# Supplementary material for: Copper-catalyzed domino coupling reaction: an efficient method to synthesize oxindoles
Source: Royal Society of Chemistry journal article supplement (doi:10.1039/c2ob26110c), 2012-01-01

*Supplementary Information*

**Copper-Catalyzed Domino Coupling Reaction: An Efficient  
Method to Synthesize Oxindoles**

Jen-Chieh Hsieh\*, An-Yi Cheng, Jun-Hao Fu and Ting-Wei Kang

*Department of Chemistry, Tamkang University, New Taipei City, 25137, Taiwan (R.O.C.)*

*[jchsieh@mail.tku.edu.tw](mailto:jchsieh@mail.tku.edu.tw)*

**Table of Contents**

|                                                                                |                      |
|--------------------------------------------------------------------------------|----------------------|
| <b>I. General Information and procedure</b>                                    | <b>Page S2–S3</b>    |
| <b>II. Experimental Details for all substrates</b>                             | <b>Page S4–S19</b>   |
| <b>III. Experimental Details for all products</b>                              | <b>Page S20–S27</b>  |
| <b>IV. Experimental Details for natural alkaloids</b>                          | <b>Page S29–S31</b>  |
| <b>V. Control Experiments and Proposed pathway</b>                             | <b>Page S31–S32</b>  |
| <b>VI. References</b>                                                          | <b>Page S33</b>      |
| <b>VII. <math>^1\text{H}</math> and <math>^{13}\text{C}</math> NMR spectra</b> | <b>Page S33–S114</b> |

**General information:** All reagents were purchased from Sigma-Aldrich, Fisher-Acros, TCI, or Alfa-Aesar, and were used without further purification unless otherwise noted. THF and Et<sub>2</sub>O were distilled from sodium, and CH<sub>3</sub>CN was distilled from CaH<sub>2</sub>. All manipulations of oxygen- and moisture-sensitive materials were conducted with a standard Schlenk technique. Flash column chromatography was performed using silica gel (230-400 mesh). Analytical thin layer chromatography (TLC) was performed on 60 F<sub>254</sub> (0.25 mm) plates and visualization was accomplished with UV light (254 and 354 nm) and/or an aqueous alkaline KMnO<sub>4</sub> solution followed by heating. Proton and carbon nuclear magnetic resonance spectra (<sup>1</sup>H NMR and <sup>13</sup>C NMR) were recorded on Bruker 300 or Bruker 600 spectrometer with Me<sub>4</sub>Si or solvent resonance as the internal standard (<sup>1</sup>H NMR, Me<sub>4</sub>Si at 0 ppm, CHCl<sub>3</sub> at 7.26 ppm; <sup>13</sup>C NMR, Me<sub>4</sub>Si at 0 ppm, CDCl<sub>3</sub> at 77.0 ppm). <sup>1</sup>H NMR data are reported as follows: chemical shift, multiplicity (s = singlet, d = doublet, t = triplet, q = quartet, quint = quintet, sext = sextet, sept = septet, br = broad, m = multiplet), coupling constants (Hz), and integration. IR spectral data were recorded on a Bruker TENSOR 37 spectrometer. Melting points (mp) were determined using a Fargo MP-1D. GC-MS data were obtained from the HP 5890 Series II GC/ HP 5972 GC MASS Spectrometer System. High Resolution Mass spectral data were obtained from the MAT-95XL HRMS by using EI method.

**General procedure for the copper-catalyzed domino reactions:**

To a screw-capped vial (10-mL) were added CuI (0.015 mmol, 2.9 mg, 3.0 mol %), KI (0.005 mmol, 0.9 mg, 1.0 mol %), *N*-acetylglycine (0.03 mmol, 3.5 mg, 6.0 mol %), NaOH (1.5 mmol, 60 mg, 3.0 equiv) and 2,2-disubstituted 2-(2-bromophenyl)-acetonitrile (**1**, 0.5 mmol, 1.0 equiv) in *t*BuOH (*tert*-butanol, 5.0 mL). The vial was sealed with cap and allowed to stir at 100 °C for the specific reaction time. The crude reaction mixture was diluted with CH<sub>2</sub>Cl<sub>2</sub>, filtered through a thin Celite pad, and concentrated *in vacuo*. The residue was isolated through a column chromatography by using hexane and ethyl acetate as eluent to give the pure product. Products **2** were obtained according to this procedure. The known structures were characterized by the HRMS, <sup>1</sup>H NMR and <sup>13</sup>C NMR spectra of reported literatures. Spectral data, melting point, HRMS data and the copies of <sup>1</sup>H NMR and <sup>13</sup>C NMR spectra for all compounds are listed below.

**General procedure (A) for the synthesis of starting materials 1a–1l:<sup>1</sup>**

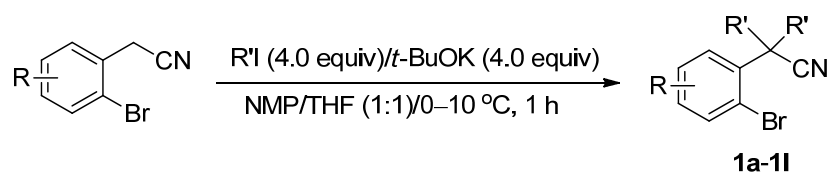

To a suspension of *t*-BuOK (897 mg, 8.0 mmol) in THF and NMP co-solvent (6 mL, 1:1) was added 2-(2-bromoaryl)acetonitrile (**5a–5j**, 2.0 mmol). The mixture was allowed to stir at 0 °C for 10 min, and RI (8.0 mmol) was then slowly injected into the reaction mixture over a period of 10 min. The resulting mixture was warmed to 10 °C and stir for an additional 1 hour, quenched with a saturated NaHCO<sub>3</sub> aqueous solution, and then extracted with ethyl acetate for three times. The combined organic layers were washed with water and brine, dried over anhydrous Na<sub>2</sub>SO<sub>4</sub>, filtered through a Celite pad, and concentrated *in vacuo*. The residue was purified by flash column chromatography on silica gel using hexane and ethyl acetate as eluent to give the pure compound. Compounds **1a–1l** were obtained according to this procedure.

**General procedure (B) for the synthesis of starting materials **1** with spiro ring:**<sup>1</sup>

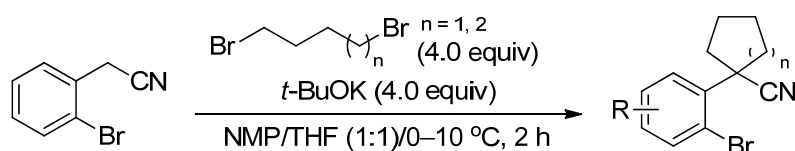

Similar procedure with the synthesis of compounds **1a–1l** expects the slight longer reaction time. Compounds **1q**, **1r**, **1A**, **1B**, **1C** and **1D** were obtained according to this procedure.

**General procedure (C) for the synthesis of 2-(2-bromoaryl)acetonitrile:**<sup>2</sup>

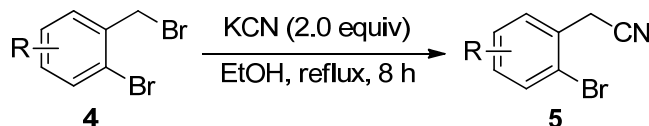

To a suspension of KCN (261 mg, 4.0 mmol) in EtOH (16 mL) was added 1-bromo-2-(bromomethyl)arene (2.0 mmol). The mixture was allowed to reflux and stir for 8 h. The residue was filtered to remove salt and isolated through a short flash column chromatography by using ethyl acetate as eluent to give the pure compound. Compounds **5c**, **5d**, **5e**, **5g**, **5h**, **5i** and **5j** were obtained according to this procedure.

**General procedure (D) for the synthesis of 1-bromo-2-(bromomethyl)arene:**<sup>3</sup>

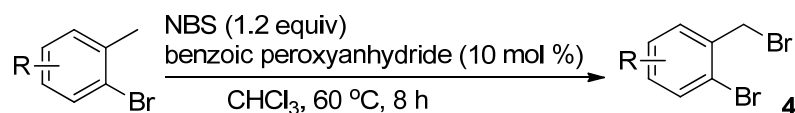

The NBS (427 mg, 2.4 mmol) and benzoic peroxyanhydride (49 mg, 0.2 mmol) were dissolved in CHCl<sub>3</sub> (6 mL). The substituted 2-bromotoluene (2.0 mmol) was added to the solution and allowed to stir at 60 °C for 8 h. The residue was filtered and isolated through a column chromatography by using hexane and ethyl acetate as eluent to give the pure compound. Compounds **4c** and **4h** were obtained according to this procedure.

## Experimental Details for all substrates:

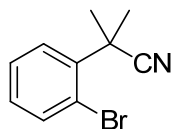

**2-(2-Bromophenyl)-2-methylpropanenitrile (1a):**<sup>4</sup> Prepared according to the general procedure A, 87% isolated yield; Yellow oil; IR (KBr): 3462, 2984, 2930, 2234, 1647, 1559, 1024, 757  $\text{cm}^{-1}$ ;  $^1\text{H}$  NMR (300 MHz,  $\text{CDCl}_3$ ):  $\delta$  7.67 (dd,  $J_1 = 8.1$  Hz,  $J_2 = 1.5$  Hz, 1H), 7.48 (dd,  $J_1 = 7.8$  Hz,  $J_2 = 1.5$  Hz, 1H), 7.35 (td,  $J_1 = 7.5$  Hz,  $J_2 = 1.2$  Hz, 1H), 7.19 (td,  $J_1 = 7.8$  Hz,  $J_2 = 1.8$  Hz, 1H), 1.90 (s, 6H);  $^{13}\text{C}$  NMR (75 MHz,  $\text{CDCl}_3$ ):  $\delta$  138.2, 135.7, 129.6, 127.9, 127.2, 123.4, 122.6, 37.5, 27.5; HRMS:  $\text{C}_{10}\text{H}_{10}\text{BrN}$  calculated 222.9997, found 222.9994; Registry Number: [57775-06-1].

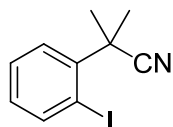

**2-(2-Iodophenyl)-2-methylpropanenitrile (1a'):** Prepared according to the general procedure A, 90% isolated yield; Colorless oil; IR (KBr): 3459, 3061, 2983, 2935, 2232, 1582, 1462, 1230, 1009, 758, 721  $\text{cm}^{-1}$ ;  $^1\text{H}$  NMR (600 MHz,  $\text{CDCl}_3$ ):  $\delta$  8.04 (dd,  $J_1 = 7.8$  Hz,  $J_2 = 1.5$  Hz, 1H), 7.46 (dd,  $J_1 = 7.8$  Hz,  $J_2 = 1.8$  Hz, 1H), 7.38 (td,  $J_1 = 7.8$  Hz,  $J_2 = 1.2$  Hz, 1H), 6.99 (td,  $J_1 = 7.8$  Hz,  $J_2 = 1.8$  Hz, 1H), 1.91 (s, 6H);  $^{13}\text{C}$  NMR (150 MHz,  $\text{CDCl}_3$ ):  $\delta$  143.3, 140.6, 129.6, 128.6, 126.8, 123.3, 95.8, 39.1, 27.9; HRMS:  $\text{C}_{10}\text{H}_{10}\text{IN}$  calculated 270.9858, found 270.9855; New compound.

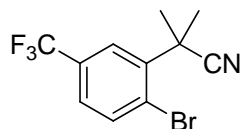

**2-(2-Bromo-5-(trifluoromethyl)phenyl)-2-methylpropanenitrile (1b):** Prepared according to the general procedure A, 79% isolated yield; Colorless oil; IR (KBr): 3458, 2989, 2236, 1608, 1475, 1330, 1174, 1129, 1027, 831  $\text{cm}^{-1}$ ;  $^1\text{H}$  NMR (600 MHz,  $\text{CDCl}_3$ ):  $\delta$  7.93 (s, 1H), 7.62 (t,  $J = 1.8$  Hz, 2H), 1.92 (s, 6H);  $^{13}\text{C}$  NMR (150 MHz,  $\text{CDCl}_3$ ):  $\delta$  142.2, 132.6 (d,  $J = 3$  Hz), 131.9 (q,  $J = 33$  Hz), 127.8, 124.8 (d,  $J = 3$  Hz), 122.8, 122.8 (q,  $J = 270$  Hz), 122.5, 37.6, 27.3; HRMS:  $\text{C}_{11}\text{H}_9\text{BrF}_3\text{N}$  calculated 290.9870, found 290.9868; New compound.

### Preparation of 2-(2-bromo-5-chlorophenyl)-2-methylpropanenitrile (1c):

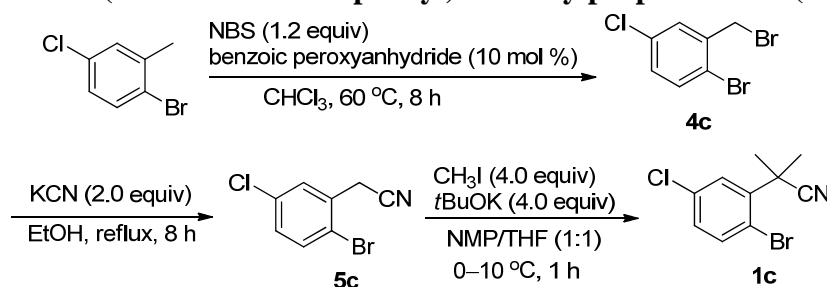

**1-Bromo-2-(bromomethyl)-4-chlorobenzene (4c):** Prepared according to the general procedure D, 85% isolated yield; White solid, mp: 66–68 °C; IR (KBr): 3474, 2922, 1753, 1656, 1453, 1215, 1104, 1026, 812, 741  $\text{cm}^{-1}$ ;  $^1\text{H}$  NMR (300 MHz,  $\text{CDCl}_3$ ):  $\delta$  7.49 (d,  $J$  = 8.4 Hz, 1H), 7.44 (d,  $J$  = 2.4 Hz, 1H), 7.15 (dd,  $J_1$  = 8.4 Hz,  $J_2$  = 2.4 Hz, 1H), 4.53 (s, 2H);  $^{13}\text{C}$  NMR (75 MHz,  $\text{CDCl}_3$ ):  $\delta$  139.3, 135.0, 134.4, 131.7, 130.8, 122.9, 32.9; HRMS:  $\text{C}_7\text{H}_5\text{Br}_2\text{Cl}$  calculated 281.8447, found 281.8443; Registry Number: [66192-24-3].

**2-(2-Bromo-5-chlorophenyl)acetonitrile (5c):** Prepared according to the general procedure C, 71% isolated yield; White solid, mp: 112–114 °C; IR (KBr): 3467, 1638, 1385, 1028, 640  $\text{cm}^{-1}$ ;  $^1\text{H}$  NMR (600 MHz,  $\text{CDCl}_3$ ):  $\delta$  7.54–7.52 (m, 2H), 7.21 (dd,  $J_1$  = 8.4 Hz,  $J_2$  = 2.4 Hz, 1H), 3.81 (s, 2H);  $^{13}\text{C}$  NMR (150 MHz,  $\text{CDCl}_3$ ):  $\delta$  134.2, 134.1, 131.6, 130.0, 129.7, 121.4, 116.2, 24.7; HRMS:  $\text{C}_8\text{H}_5\text{BrClN}$  calculated 228.9294, found 228.9297; New compound.

**2-(2-Bromo-5-chlorophenyl)-2-methylpropanenitrile (1c):** Prepared according to the general procedure A, 86% isolated yield; White solid, mp: 162–164 °C; IR (KBr): 3450, 2986, 2939, 1638, 1459, 1382, 1226, 1109, 1024, 817  $\text{cm}^{-1}$ ;  $^1\text{H}$  NMR (600 MHz,  $\text{CDCl}_3$ ):  $\delta$  7.54 (d,  $J$  = 8.4 Hz, 1H), 7.40 (d,  $J$  = 2.4 Hz, 1H), 7.14 (dd,  $J_1$  = 8.4 Hz,  $J_2$  = 2.4 Hz, 1H), 1.83 (s, 6H);  $^{13}\text{C}$  NMR (150 MHz,  $\text{CDCl}_3$ ):  $\delta$  139.7, 136.4, 133.8, 129.4, 127.3, 122.4, 120.2, 36.9, 27.1; HRMS:  $\text{C}_{10}\text{H}_9\text{BrClN}$  calculated 256.9607, found 256.9607; New compound.

### Preparation of 2-(2-bromo-5-methoxyphenyl)-2-methylpropanenitrile (1d):

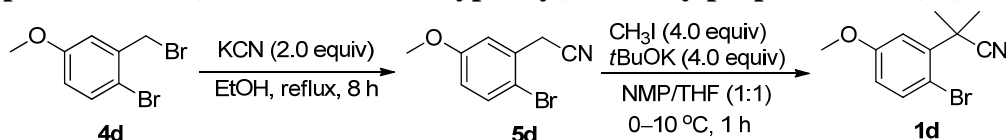

**2-(2-Bromo-5-methoxyphenyl)acetonitrile (5d):**<sup>3</sup> Prepared according to the general procedure C, 86% isolated yield; White solid, mp: 54–56 °C; IR (KBr): 3531, 3008, 2939, 2839, 2251, 1575, 1475, 1019, 810, 597  $\text{cm}^{-1}$ ;  $^1\text{H}$  NMR (300 MHz,  $\text{CDCl}_3$ ):  $\delta$  7.47 (d,  $J$  = 9.0 Hz, 1H), 7.07 (d,  $J$  = 3.0 Hz, 1H), 6.77 (dd,  $J_1$  = 9.0 Hz,  $J_2$  = 3.0 Hz, 1H), 3.82 (s, 3H), 3.80 (s, 2H);  $^{13}\text{C}$  NMR (75 MHz,  $\text{CDCl}_3$ ):  $\delta$  159.4, 133.7, 130.7, 116.8, 115.6, 115.4, 113.7, 55.6, 24.9; HRMS:  $\text{C}_9\text{H}_8\text{BrNO}$  calculated 224.9789, found

224.9786; Registry Number: [27387-23-1].

**2-(2-Bromo-5-methoxyphenyl)-2-methylpropanenitrile (1d):** Prepared according to the general procedure A, 99% isolated yield; Colorless oil; IR (KBr): 3468, 2983, 2937, 2285, 2235, 1468, 1292, 1246, 1047  $\text{cm}^{-1}$ ;  $^1\text{H}$  NMR (300 MHz,  $\text{CDCl}_3$ ):  $\delta$  7.53 (d,  $J = 8.7$  Hz, 1H), 7.02 (d,  $J = 2.7$  Hz, 1H), 6.73 (dd,  $J_1 = 8.7$  Hz,  $J_2 = 3.0$  Hz, 1H), 3.80 (s, 3H), 1.86 (s, 6H);  $^{13}\text{C}$  NMR (75 MHz,  $\text{CDCl}_3$ ):  $\delta$  159.1, 139.1, 136.1, 123.2, 114.5, 113.9, 112.5, 55.5, 37.3, 27.3; HRMS:  $\text{C}_{11}\text{H}_{12}\text{BrNO}$  calculated 253.0102, found 253.0106; Registry Number: [173026-39-6].

**Preparation of 2-(6-bromobenzo[*d*][1,3]dioxol-5-yl)-2-methylpropanenitrile (1e):**

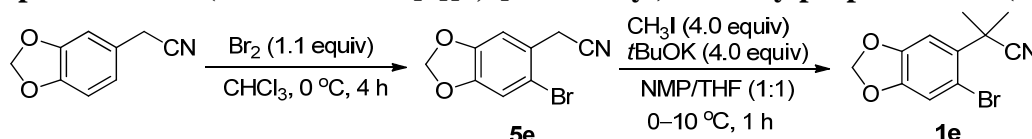

**2-(6-Bromobenzo[*d*][1,3]dioxol-5-yl)acetonitrile (5e):**<sup>5</sup> To a round bottom flask (25 mL), the commercial source 2-(benzo[*d*][1,3]dioxol-5-yl)-acetonitrile (322 mg, 2.0 mmol) was dissolved in  $\text{CHCl}_3$  (5 mL) and the flask was sealed by a septum. The reaction mixture was kept stirring at 0 °C and covered by an aluminum foil to make sure that the reaction process in dark. Bromine (352 mg, 2.2 mmol) was then dropwise injected into the solution and allowed to stir at 0 °C for 4 h, quenched by a saturated  $\text{NaHCO}_3$  aqueous solution, and then extracted with ether for three times. The combined organic layers were washed with water and brine, dried over anhydrous  $\text{Na}_2\text{SO}_4$ , filtered through a Celite pad, and concentrated *in vacuo*. The residue was purified by flash column chromatography on silica gel using hexane and ethyl acetate as eluent to give the pure product **5e** in 55% isolated yield; White solid, mp: 64–66 °C; IR (KBr): 3467, 2917, 2286, 1634, 1503, 1384, 1246, 861, 657  $\text{cm}^{-1}$ ;  $^1\text{H}$  NMR (300 MHz,  $\text{CDCl}_3$ ):  $\delta$  7.04 (s, 1H), 6.98 (s, 1H), 6.02 (s, 2H), 3.75 (s, 2H);  $^{13}\text{C}$  NMR (75 MHz,  $\text{CDCl}_3$ ):  $\delta$  148.5, 147.9, 122.6, 117.0, 114.2, 113.0, 109.5, 102.2, 24.6; HRMS:  $\text{C}_9\text{H}_6\text{BrNO}_2$  calculated 238.9582, found 238.9583; Registry Number: [5434-50-4].

**2-(6-Bromobenzo[*d*][1,3]dioxol-5-yl)-2-methylpropanenitrile (1e):** Prepared according to the general procedure A, 85% isolated yield; Colorless oil; IR (KBr): 3467, 2916, 2233, 1637, 1483, 1242, 1036, 931, 860, 636  $\text{cm}^{-1}$ ;  $^1\text{H}$  NMR (300 MHz,  $\text{CDCl}_3$ ):  $\delta$  7.10 (s, 1H), 6.95 (s, 1H), 6.00 (s, 2H), 1.84 (s, 6H);  $^{13}\text{C}$  NMR (75 MHz,  $\text{CDCl}_3$ ):  $\delta$  147.9, 147.7, 131.4, 123.3, 115.2, 113.5, 107.2, 102.2, 36.9, 27.8; HRMS:  $\text{C}_{11}\text{H}_{10}\text{BrNO}_2$  calculated 266.9895, found 266.9889; New compound.

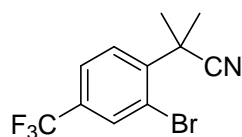

**2-(2-Bromo-4-(trifluoromethyl)phenyl)-2-methylpropanenitrile (1f):** Prepared according to the general procedure A, 99% isolated yield; Colorless oil; IR (KBr): 3459, 2989, 2237, 1614, 1396, 1327, 1132, 892, 832, 709  $\text{cm}^{-1}$ ;  $^1\text{H}$  NMR (300 MHz,  $\text{CDCl}_3$ ):  $\delta$  7.90 (s, 1H), 7.60 (s, 2H), 1.90 (s, 6H);  $^{13}\text{C}$  NMR (75 MHz,  $\text{CDCl}_3$ ):  $\delta$  142.2, 132.5, 131.7 (q,  $J = 33$  Hz), 127.8, 124.8, 122.9 (q,  $J = 286$  Hz), 122.8, 122.5, 37.5, 27.2; HRMS:  $\text{C}_{11}\text{H}_9\text{BrF}_3\text{N}$  calculated 290.9870, found 290.9870; New compound.

**Preparation of 2-(2-bromo-4-methoxyphenyl)-2-methylpropanenitrile (1g):**

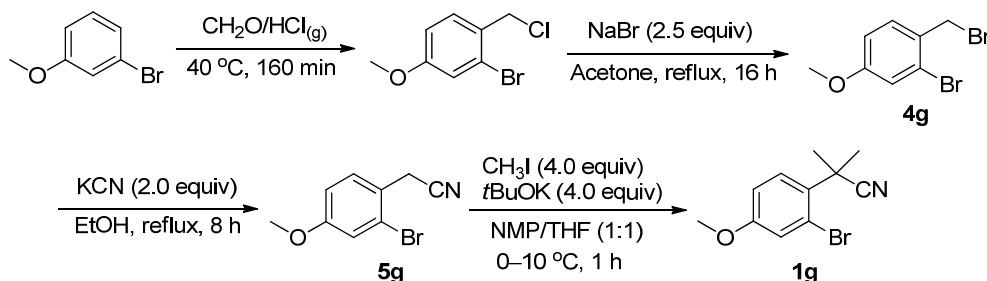

**2-Bromo-1-(bromomethyl)-4-methoxybenzene (4g):**<sup>6</sup> Preparation and experimental data please see the ref 6 for the detail.

**2-(2-Bromo-4-methoxyphenyl)acetonitrile (5g):** Prepared according to the general procedure C, 73% isolated yield; Yellow solid, mp: 52–54 °C; IR (KBr): 3461, 2963, 2926, 2851, 2252, 1605, 1495, 1288, 1241, 1031, 862  $\text{cm}^{-1}$ ;  $^1\text{H}$  NMR (600 MHz,  $\text{CDCl}_3$ ):  $\delta$  7.40 (d,  $J = 8.4$  Hz, 1H), 7.15 (d,  $J = 3.0$  Hz, 1H), 6.89 (dd,  $J_1 = 8.4$  Hz,  $J_2 = 2.4$  Hz, 1H), 3.81 (s, 3H), 3.77 (s, 2H);  $^{13}\text{C}$  NMR (150 MHz,  $\text{CDCl}_3$ ):  $\delta$  160.1, 130.2, 123.9, 121.7, 118.5, 117.2, 114.0, 55.7, 24.0; HRMS:  $\text{C}_9\text{H}_8\text{BrNO}$  calculated 224.9789, found 224.9790; Registry Number: [66916-98-1].

**2-(2-Bromo-4-methoxyphenyl)-2-methylpropanenitrile (1g):** Prepared according to the general procedure A, 87% isolated yield; Colorless oil; IR (KBr): 3468, 2924, 2851, 1603, 1492, 1385, 1298, 1244, 1034, 812  $\text{cm}^{-1}$ ;  $^1\text{H}$  NMR (600 MHz,  $\text{CDCl}_3$ ):  $\delta$  7.35 (d,  $J = 9.0$  Hz, 1H), 7.20 (d,  $J = 2.4$  Hz, 1H), 6.85 (dd,  $J_1 = 8.4$  Hz,  $J_2 = 2.4$  Hz, 1H), 3.79 (s, 3H), 1.85 (s, 6H);  $^{13}\text{C}$  NMR (150 MHz,  $\text{CDCl}_3$ ):  $\delta$  159.4, 130.2, 127.7, 123.6, 122.8, 120.8, 113.3, 55.5, 36.6, 27.7; HRMS:  $\text{C}_{11}\text{H}_{12}\text{BrNO}$  calculated 253.0102, found 253.0109; New compound.



### Preparation of 2-(2-bromo-6-chlorophenyl)-2-methylpropanenitrile (1h):

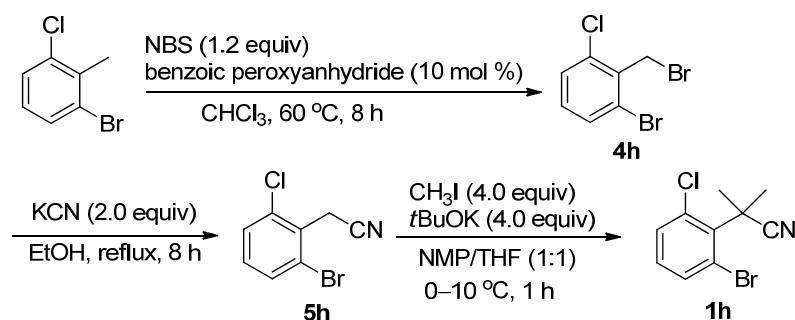

**1-Bromo-2-(bromomethyl)-3-chlorobenzene (4h):** Prepared according to the general procedure D, 80% isolated yield; White solid, mp: 58–60 °C; IR (KBr): 3465, 2920, 1638, 1571, 1436, 1074, 863, 742  $\text{cm}^{-1}$ ;  $^1\text{H}$  NMR (300 MHz,  $\text{CDCl}_3$ ):  $\delta$  7.48 (dd,  $J_1 = 8.1$  Hz,  $J_2 = 1.2$  Hz, 1H), 7.34 (dd,  $J_1 = 7.8$  Hz,  $J_2 = 0.9$  Hz, 1H), 7.08 (t,  $J = 8.4$  Hz, 1H), 4.77 (s, 2H);  $^{13}\text{C}$  NMR (75 MHz,  $\text{CDCl}_3$ ):  $\delta$  135.8, 135.1, 132.0, 130.5, 129.3, 126.0, 30.9; HRMS:  $\text{C}_7\text{H}_5\text{Br}_2\text{Cl}$  calculated 281.8447, found 281.8442; Registry Number: [75002-98-1].

**2-(2-Bromo-6-chlorophenyl)acetonitrile (5h):**<sup>3</sup> Prepared according to the general procedure C, 65% isolated yield; White solid, mp: 74–76 °C; IR (KBr): 3488, 1753, 1631, 1520, 1364, 1261, 773, 617, 552, 442  $\text{cm}^{-1}$ ;  $^1\text{H}$  NMR (300 MHz,  $\text{CDCl}_3$ ):  $\delta$  7.54 (dd,  $J_1 = 8.4$  Hz,  $J_2 = 1.2$  Hz, 1H), 7.41 (d,  $J = 8.1$  Hz, 1H), 7.17 (t,  $J = 8.1$  Hz, 1H), 4.05 (s, 2H);  $^{13}\text{C}$  NMR (75 MHz,  $\text{CDCl}_3$ ):  $\delta$  135.6, 132.1, 130.8, 129.4, 128.8, 125.7, 115.6, 23.0; HRMS:  $\text{C}_8\text{H}_5\text{BrClN}$  calculated 228.9294, found 228.9297; Registry Number: [76574-39-5].

**2-(2-Bromo-6-chlorophenyl)-2-methylpropanenitrile (1h):** Prepared according to the general procedure A, 90% isolated yield; Colorless oil; IR (KBr): 3487, 2980, 2935, 2247, 1682, 1559, 1429, 1195, 793, 753  $\text{cm}^{-1}$ ;  $^1\text{H}$  NMR (300 MHz,  $\text{CDCl}_3$ ):  $\delta$  7.59 (d,  $J = 7.8$  Hz, 1H), 7.39 (d,  $J = 8.1$  Hz, 1H), 7.05 (t,  $J = 7.8$  Hz, 1H), 2.10 (s, 6H);  $^{13}\text{C}$  NMR (75 MHz,  $\text{CDCl}_3$ ):  $\delta$  135.2, 134.6, 132.0, 130.2, 129.4, 124.1, 123.2, 39.9, 29.3; HRMS:  $\text{C}_{10}\text{H}_9\text{BrClN}$  calculated 256.9607, found 256.9606; New compound.

### Preparation of 2-(1-bromonaphthalen-2-yl)-2-methylpropanenitrile (1i):

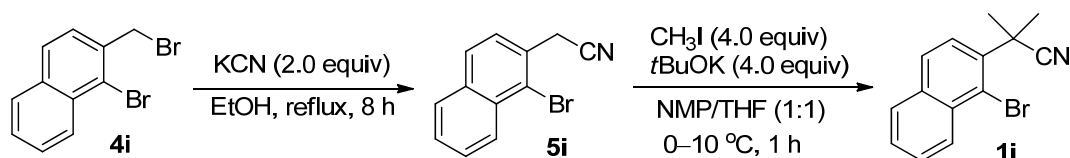

**2-(1-Bromonaphthalen-2-yl)acetonitrile (5i):**<sup>7</sup> Prepared according to the general procedure C, 48% isolated yield; White solid, mp: 122–123 °C; IR (KBr): 3459, 2905, 2252, 1502, 1384, 1257, 799, 750, 531  $\text{cm}^{-1}$ ;  $^1\text{H}$  NMR (300 MHz,  $\text{CDCl}_3$ ):  $\delta$  8.27 (d,  $J$



= 8.4 Hz, 1H), 7.83 (d,  $J$  = 8.1 Hz, 2H), 7.65–7.53 (m, 3H), 4.05 (s, 2H);  $^{13}\text{C}$  NMR (75 MHz,  $\text{CDCl}_3$ ):  $\delta$  133.8, 132.2, 128.5, 128.2, 128.1, 127.7, 127.2, 127.1, 126.0, 124.1, 117.0, 25.8; HRMS:  $\text{C}_{12}\text{H}_8\text{BrN}$  calculated 244.9840, found 244.9844; Registry Number: [6323-67-7].

**2-(1-Bromonaphthalen-2-yl)-2-methylpropanenitrile (1i):** Prepared according to the general procedure A, 90% isolated yield; White solid, mp: 75–77 °C; IR (KBr): 3459, 2982, 2929, 2231, 1637, 1502, 1320, 966, 811, 746  $\text{cm}^{-1}$ ;  $^1\text{H}$  NMR (300 MHz,  $\text{CDCl}_3$ ):  $\delta$  8.47 (d,  $J$  = 8.7 Hz, 1H), 7.82 (t,  $J$  = 4.8 Hz, 2H), 7.63 (td,  $J$  = 4.8 Hz, 1H), 7.58–7.53 (m, 2H), 2.01 (s, 6H);  $^{13}\text{C}$  NMR (75 MHz,  $\text{CDCl}_3$ ):  $\delta$  136.0, 133.7, 133.2, 128.4, 128.0, 127.9, 127.7, 127.2, 123.9, 123.7, 123.5, 38.1, 28.1; HRMS:  $\text{C}_{14}\text{H}_{12}\text{BrN}$  calculated 273.0153, found 273.0156; New compound.

**Preparation of 2-(2-bromopyridin-3-yl)-2-methylpropanenitrile (1j):**

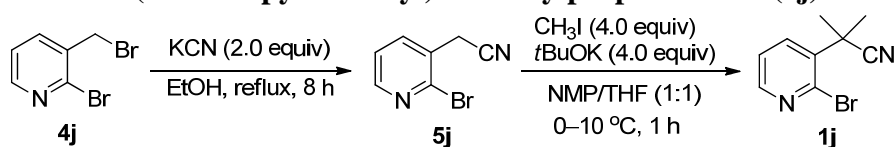

**2-(2-Bromopyridin-3-yl)acetonitrile (5j):**<sup>8</sup> Prepared according to the general procedure C, 65% isolated yield; Colorless oil; IR (KBr): 3467, 2923, 2852, 2297, 1636, 1406, 1122  $\text{cm}^{-1}$ ;  $^1\text{H}$  NMR (300 MHz,  $\text{CDCl}_3$ ):  $\delta$  8.37 (dd,  $J_1$  = 4.8 Hz,  $J_2$  = 1.8 Hz, 1H), 7.86 (dd,  $J_1$  = 7.8 Hz,  $J_2$  = 1.8 Hz, 1H), 7.36 (dd,  $J_1$  = 7.8 Hz,  $J_2$  = 4.8 Hz, 1H), 3.86 (s, 2H);  $^{13}\text{C}$  NMR (75 MHz,  $\text{CDCl}_3$ ):  $\delta$  149.7, 143.1, 137.7, 127.8, 123.3, 115.8, 24.2; HRMS:  $\text{C}_7\text{H}_5\text{BrN}_2$  calculated 195.9636, found 195.9635; Registry Number: [1211523-71-5].

**2-(2-Bromopyridin-3-yl)-2-methylpropanenitrile (1j):** Prepared according to the general procedure A, 83% isolated yield; Yellow oil; IR (KBr): 3449, 2923, 1637, 1572, 1557, 1388, 1041, 743, 643  $\text{cm}^{-1}$ ;  $^1\text{H}$  NMR (300 MHz,  $\text{CDCl}_3$ ):  $\delta$  8.36 (dd,  $J_1$  = 4.8 Hz,  $J_2$  = 1.8 Hz, 1H), 7.81 (dd,  $J_1$  = 7.5 Hz,  $J_2$  = 1.8 Hz, 1H), 7.33 (dd,  $J_1$  = 8.1 Hz,  $J_2$  = 4.8 Hz, 1H), 1.92 (s, 6H);  $^{13}\text{C}$  NMR (75 MHz,  $\text{CDCl}_3$ ):  $\delta$  149.1, 141.7, 136.0, 135.8, 123.0, 122.4, 36.5, 26.9; HRMS:  $\text{C}_9\text{H}_9\text{BrN}_2$  calculated 223.9949, found 223.9944; New compound.

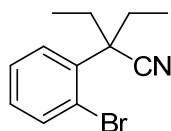

**2-(2-Bromophenyl)-2-ethylbutanenitrile (1k):**<sup>4</sup> Prepared according to the general procedure A, 95% isolated yield; Colorless oil; IR (KBr): 3450, 2973, 2936, 2879, 2285, 2233, 1637, 893, 755  $\text{cm}^{-1}$ ;  $^1\text{H}$  NMR (300 MHz,  $\text{CDCl}_3$ ):  $\delta$  7.69 (dd,  $J_1$  = 7.8 Hz,  $J_2$  = 1.8 Hz, 1H), 7.62 (dd,  $J_1$  = 7.8 Hz,  $J_2$  = 1.2 Hz, 1H), 7.33 (td,  $J_1$  = 7.5 Hz,  $J_2$

= 1.2 Hz, 1H), 7.17 (td,  $J_1 = 7.5$  Hz,  $J_2 = 1.8$  Hz, 1H), 2.71–2.59 (m, 2H), 2.13–2.01 (m, 2H), 0.91 (t,  $J = 7.2$  Hz, 6H);  $^{13}\text{C}$  NMR (75 MHz,  $\text{CDCl}_3$ ):  $\delta$  135.9, 134.6, 131.7, 129.3, 127.5, 122.5, 120.3, 52.2, 30.0, 9.8; HRMS:  $\text{C}_{12}\text{H}_{14}\text{BrN}$  calculated 251.0310, found 251.0315; Registry Number: [212626-87-4].

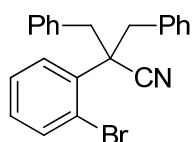

**2-Benzyl-2-(2-bromophenyl)-3-phenylpropanenitrile (11):**<sup>9</sup> Prepared according to the general procedure A, 99% isolated yield; White solid, mp: 92–94 °C; IR (KBr): 3468, 3031, 2930, 2862, 2236, 1604, 1024, 759, 657  $\text{cm}^{-1}$ ;  $^1\text{H}$  NMR (300 MHz,  $\text{CDCl}_3$ ):  $\delta$  7.68 (dd,  $J_1 = 7.8$  Hz,  $J_2 = 1.8$  Hz, 1H), 7.23–7.00 (m, 13H), 4.20 (d,  $J = 13.8$  Hz, 2H), 3.36 (d,  $J = 13.8$  Hz, 2H);  $^{13}\text{C}$  NMR (75 MHz,  $\text{CDCl}_3$ ):  $\delta$  135.9, 135.3, 133.7, 132.9, 130.2, 129.6, 128.1, 127.8, 127.2, 121.6, 120.5, 54.5, 41.8; HRMS:  $\text{C}_{22}\text{H}_{18}\text{BrN}$  calculated 375.0623, found 375.0621; Registry Number: [1312716-88-3].

#### Preparation of 2-(2-bromophenyl)-2-methoxybutanenitrile (1m):

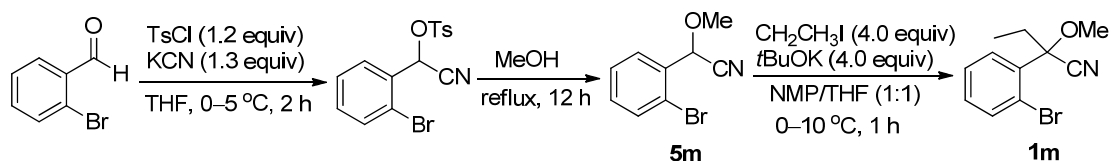

**2-(2-Bromophenyl)-2-methoxyacetonitrile (5m):** To a solution of TsCl (458 mg, 2.4 mmol) in THF (2 mL) was added to the solution of 2-bromobenzaldehyde (370 mg, 2 mmol) in THF (2 mL) at 0 °C. The mixture was allowed to stir for 15 min; the solution of KCN (169 mg, 2.6 mmol) in  $\text{H}_2\text{O}$  (1.5 mL) was then added into the solution of 2-bromobenzaldehyde. The resulting solution mixture was kept to stir for 2 h, extracted by ether, filtered to remove salt and concentrated *in vacuo*. The crude residue was dissolved in methanol (30 mL), and allowed to keep stirring for 12 h under reflux. The crude reaction mixture was filtered and concentrated *in vacuo*, isolated through a column chromatography to get compound **5m** in 99% isolated yield; Colorless oil; IR (KBr): 3467, 3004, 2933, 2830, 2288, 1629, 1592, 1471, 1438, 1198, 1086, 754  $\text{cm}^{-1}$ ;  $^1\text{H}$  NMR (300 MHz,  $\text{CDCl}_3$ ):  $\delta$  7.70 (dd,  $J_1 = 7.8$  Hz,  $J_2 = 1.8$  Hz, 1H), 7.62 (td,  $J_1 = 7.8$  Hz,  $J_2 = 0.9$  Hz, 1H), 7.41 (td,  $J_1 = 7.8$  Hz,  $J_2 = 1.2$  Hz, 1H), 7.28 (td,  $J_1 = 7.8$  Hz,  $J_2 = 1.5$  Hz, 1H), 5.44 (s, 1H), 3.61 (s, 3H);  $^{13}\text{C}$  NMR (75 MHz,  $\text{CDCl}_3$ ):  $\delta$  133.1, 132.8, 131.2, 128.9, 128.0, 122.8, 116.3, 71.6, 57.9; HRMS:  $\text{C}_9\text{H}_8\text{BrNO}$  calculated 224.9789, found 224.9791; New compound.

**2-(2-Bromophenyl)-2-methoxybutanenitrile (1m):** Prepared according to the general procedure A, 91% isolated yield; Yellow oil; IR (KBr): 3458, 2882, 2285,

1638, 1467, 1429, 1027, 758  $\text{cm}^{-1}$ ;  $^1\text{H}$  NMR (300 MHz,  $\text{CDCl}_3$ ):  $\delta$  7.65 (dd,  $J_1 = 8.1$  Hz,  $J_2 = 1.5$  Hz, 2H), 7.38 (td,  $J_1 = 7.5$  Hz,  $J_2 = 1.2$  Hz, 1H), 7.24 (td,  $J_1 = 7.8$  Hz,  $J_2 = 1.8$  Hz, 1H), 3.37 (s, 3H), 2.38–2.28 (m, 2H), 0.99 (t,  $J = 7.2$  Hz, 3H);  $^{13}\text{C}$  NMR (75 MHz,  $\text{CDCl}_3$ ):  $\delta$  135.8, 134.0, 130.4, 130.0, 127.6, 119.9, 117.5, 84.0, 54.2, 32.2, 8.6; HRMS:  $\text{C}_{11}\text{H}_{12}\text{BrNO}$  calculated 253.0102, found 253.0101; New compound.

### Preparation of 2-(2-bromophenyl)-2-isopropoxybutanenitrile (1n):

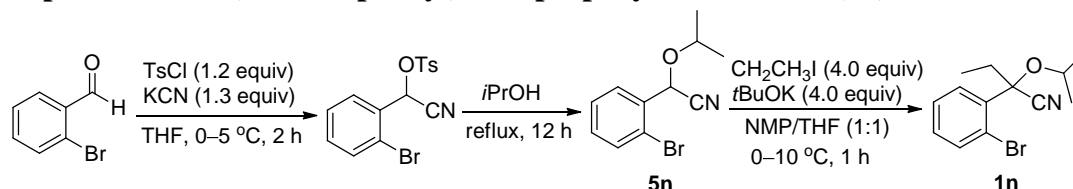

**2-(2-Bromophenyl)-2-isopropoxyacetonitrile (5n):** Procedure was the same with the preparation of **5m**, 99% isolated yield; Colorless oil; IR (KBr): 3459, 2976, 2932, 1636, 1469, 1385, 1116, 1026, 754, 684  $\text{cm}^{-1}$ ;  $^1\text{H}$  NMR (300 MHz,  $\text{CDCl}_3$ ):  $\delta$  7.74 (dd,  $J_1 = 7.8$  Hz,  $J_2 = 1.8$  Hz, 1H), 7.60 (dd,  $J_1 = 8.1$  Hz,  $J_2 = 1.2$  Hz, 1H), 7.42 (td,  $J_1 = 7.8$  Hz,  $J_2 = 1.2$  Hz, 1H), 7.28 (td,  $J_1 = 7.5$  Hz,  $J_2 = 1.8$  Hz, 1H), 5.58 (s, 1H), 4.14–4.01 (m, 1H), 1.35 (d,  $J = 6.3$  Hz, 3H), 1.29 (d,  $J = 6.0$  Hz, 3H);  $^{13}\text{C}$  NMR (75 MHz,  $\text{CDCl}_3$ ):  $\delta$  133.8, 133.1, 131.1, 129.3, 128.2, 122.7, 117.5, 72.9, 67.7, 22.5, 21.4; HRMS:  $\text{C}_{11}\text{H}_{12}\text{BrNO}$  calculated 253.0102, found 253.0105; New compound.

**2-(2-Bromophenyl)-2-isopropoxybutanenitrile (1n):** Prepared according to the general procedure A, 86% isolated yield; White solid, mp: 30–32  $^\circ\text{C}$ ; IR (KBr): 3462, 2976, 2937, 1466, 1384, 1077, 923, 757, 453  $\text{cm}^{-1}$ ;  $^1\text{H}$  NMR (600 MHz,  $\text{CDCl}_3$ ):  $\delta$  7.79 (dd,  $J_1 = 8.4$  Hz,  $J_2 = 1.8$  Hz, 1H), 7.64 (dd,  $J_1 = 7.8$  Hz,  $J_2 = 0.6$  Hz, 1H), 7.36 (td,  $J_1 = 7.8$  Hz,  $J_2 = 1.2$  Hz, 1H), 7.22 (td,  $J_1 = 7.8$  Hz,  $J_2 = 1.2$  Hz, 1H), 3.94–3.90 (m, 1H), 2.46–2.38 (m, 2H), 1.33 (d,  $J = 6.0$  Hz, 3H), 1.11 (d,  $J = 6.0$  Hz, 3H), 0.93 (t,  $J = 7.5$  Hz, 3H);  $^{13}\text{C}$  NMR (150 MHz,  $\text{CDCl}_3$ ):  $\delta$  135.9, 135.3, 130.4, 130.3, 127.3, 120.4, 118.9, 82.4, 71.2, 32.3, 23.2, 23.0, 8.7; HRMS:  $\text{C}_{13}\text{H}_{16}\text{BrNO}$  calculated 281.0415, found 281.0419; New compound.

### Preparation of 2-(2-bromophenyl)-2-phenoxybutanenitrile (1o):

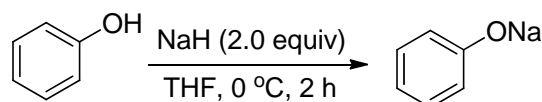

**Preparation of sodium phenoxide:** Sodium hydride powder (NaH, 60% in mineral oil, 192 mg, 4.8 mmol) was washed by the dry hexane for several times. The hexane was removed and THF (6 mL) was then added and kept stirring at 0  $^\circ\text{C}$ . Phenol (226 mg, 2.4 mmol) was slowly added into the suspension and the reaction mixture was

allowed to stir at 0 °C for 2 h. The crude residue was concentrated *in vacuo* to remove THF. The resulting crude sodium phenoxide was directly used for the synthesis of compound **5o**.

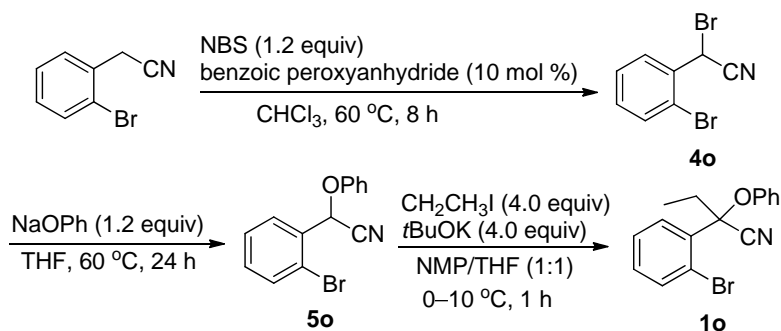

**2-Bromo-2-(2-bromophenyl)acetonitrile (4o):** Prepared according to the general procedure D, 55% isolated yield; White solid, mp: 67–68 °C; IR (KBr): 3468, 2969, 2924, 2853, 2248, 1639, 1471, 1442, 758, 720, 676, 648, 617 cm<sup>-1</sup>; <sup>1</sup>H NMR (300 MHz, CDCl<sub>3</sub>): δ 7.84 (dd, *J*<sub>1</sub> = 7.8 Hz, *J*<sub>2</sub> = 1.5 Hz, 1H), 7.60 (dd, *J*<sub>1</sub> = 8.1 Hz, *J*<sub>2</sub> = 1.2 Hz, 1H), 7.43 (t, *J* = 6.6 Hz, 1H), 7.28 (t, *J* = 7.8 Hz, 1H), 5.85 (s, 1H); <sup>13</sup>C NMR (75 MHz, CDCl<sub>3</sub>): δ 133.8, 132.9, 131.9, 129.7, 128.8, 123.1, 116.0, 27.5; HRMS: C<sub>8</sub>H<sub>5</sub>Br<sub>2</sub>N calculated 272.8789, found 272.8785; New compound.

**2-(2-Bromophenyl)-2-phenoxyacetonitrile (5o):** To a solution of **4o** (550 mg, 2.0 mmol) in THF (4 mL) was added the prepared crude sodium phenoxide. The mixture was allowed to stir at 60 °C for 24 h, filtered to remove the salt and isolated by short column to give **5o** in 53% isolated yield; White solid, mp: 116–118 °C; IR (KBr): 3467, 2925, 2854, 1745, 1647, 1636, 1458, 1384, 740 cm<sup>-1</sup>; <sup>1</sup>H NMR (600 MHz, CDCl<sub>3</sub>): δ 7.85 (dd, *J*<sub>1</sub> = 7.8 Hz, *J*<sub>2</sub> = 1.8 Hz, 1H), 7.67 (d, *J* = 6.6 Hz, 1H), 7.47 (td, *J*<sub>1</sub> = 7.8 Hz, *J*<sub>2</sub> = 1.2 Hz, 1H), 7.38–7.33 (m, 3H), 7.12 (t, *J* = 7.8 Hz, 3H), 6.18 (s, 1H); <sup>13</sup>C NMR (150 MHz, CDCl<sub>3</sub>): δ 156.3, 133.4, 132.4, 131.7, 129.9, 129.3, 128.4, 123.6, 122.9, 116.4, 116.1, 68.7; HRMS: C<sub>14</sub>H<sub>10</sub>BrNO calculated 286.9946, found 286.9949; New compound.

**2-(2-Bromophenyl)-2-phenoxybutanenitrile (1o):** Prepared according to the general procedure A, 82% isolated yield; Colorless oil; IR (KBr): 3464, 3088, 3957, 1574, 1476, 1408, 1184, 1008, 731 cm<sup>-1</sup>; <sup>1</sup>H NMR (300 MHz, CDCl<sub>3</sub>): δ 7.71 (dd, *J*<sub>1</sub> = 7.8 Hz, *J*<sub>2</sub> = 1.5 Hz, 1H), 7.65 (dd, *J*<sub>1</sub> = 8.1 Hz, *J*<sub>2</sub> = 1.5 Hz, 1H), 7.36 (t, *J* = 6.6 Hz, 1H), 7.26–7.20 (m, 3 H), 7.03 (d, *J* = 7.5 Hz, 1H), 6.95–6.92 (m, 2H), 2.62–2.49 (m, 2 H), 1.18 (t, *J* = 7.2 Hz, 3H); <sup>13</sup>C NMR (75 MHz, CDCl<sub>3</sub>): δ 154.5, 135.9, 134.5, 130.5, 129.6, 129.1, 127.7, 122.9, 119.5, 118.2, 117.1, 81.7, 33.8, 8.7; HRMS: C<sub>16</sub>H<sub>14</sub>BrNO calculated 315.0259, found 315.0260; New compound.

**Preparation of 2-(2-bromophenyl)-2-(phenylthio)butanenitrile (1p):**

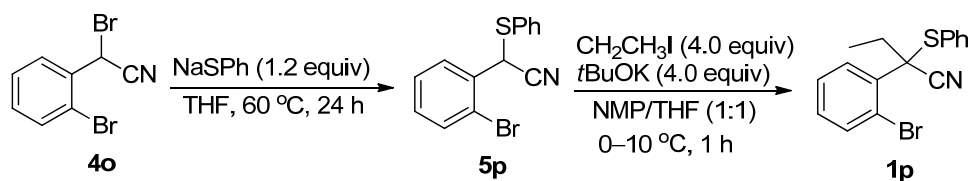

**2-(2-Bromophenyl)-2-(phenylthio)acetonitrile (5p):** Procedure was the same with the preparation of **5o**, 52% isolated yield; White solid, mp: 53–55 °C; IR (KBr): 3459, 2924, 2853, 2285, 1639, 1384, 727, 707, 623  $\text{cm}^{-1}$ ;  $^1\text{H}$  NMR (300 MHz,  $\text{CDCl}_3$ ):  $\delta$  7.65–7.62 (m, 1H), 7.54–7.50 (m, 2H), 7.44–7.41 (m, 1H), 7.38–7.33 (m, 2H), 7.25–7.21 (m, 3H), 5.34 (s, 1H);  $^{13}\text{C}$  NMR (75 MHz,  $\text{CDCl}_3$ ):  $\delta$  135.9, 133.5, 131.9, 130.6, 130.2, 129.8, 129.6, 129.3, 127.8, 123.2, 117.7, 41.9; HRMS:  $\text{C}_{14}\text{H}_{10}\text{BrNS}$  calculated 302.9717, found 302.9721; New compound.

**2-(2-Bromophenyl)-2-(phenylthio)butanenitrile (1p):** Prepared according to the general procedure A, 80% isolated yield; Yellow oil; IR (KBr): 3460, 2972, 2934, 1637, 1469, 1459, 1025, 749, 691  $\text{cm}^{-1}$ ;  $^1\text{H}$  NMR (300 MHz,  $\text{CDCl}_3$ ):  $\delta$  7.72–7.66 (m, 1H), 7.38–7.30 (m, 4H), 7.23–7.11 (m, 4H), 3.10–3.02 (m, 1H), 2.42–2.35 (m, 1H), 1.04 (t,  $J = 7.5$  Hz, 3H);  $^{13}\text{C}$  NMR (75 MHz,  $\text{CDCl}_3$ ):  $\delta$  136.6, 136.3, 132.6, 131.6, 130.1, 129.9, 129.8, 128.7, 127.1, 121.1, 119.7, 57.5, 30.4, 10.3; HRMS:  $\text{C}_{16}\text{H}_{14}\text{BrNS}$  calculated 331.0030, found 331.0035; New compound.

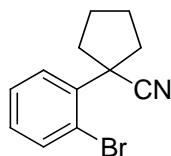

**2-(2-Bromophenyl)-2-(phenylthio)butanenitrile (1q):**<sup>10</sup> Prepared according to the general procedure B, 90% isolated yield; Colorless oil; IR (KBr): 3467, 2960, 2876, 2231, 1469, 1023, 756  $\text{cm}^{-1}$ ;  $^1\text{H}$  NMR (300 MHz,  $\text{CDCl}_3$ ):  $\delta$  7.67 (dd,  $J_1 = 8.1$  Hz,  $J_2 = 1.2$  Hz, 1H), 7.41 (dd,  $J_1 = 8.1$  Hz,  $J_2 = 1.5$  Hz, 1H), 7.31 (td,  $J_1 = 8.1$  Hz,  $J_2 = 1.5$  Hz, 1H), 7.18 (td,  $J_1 = 7.8$  Hz,  $J_2 = 1.8$  Hz, 1H), 2.79–2.71 (m, 2H), 2.25–2.15 (m, 2H), 2.07–2.00 (m, 2H), 1.94–1.87 (m, 2H);  $^{13}\text{C}$  NMR (75 MHz,  $\text{CDCl}_3$ ):  $\delta$  137.6, 135.2, 129.5, 127.7, 127.5, 123.7, 122.9, 47.6, 38.2, 23.7; HRMS:  $\text{C}_{12}\text{H}_{12}\text{BrN}$  calculated 249.0153, found 249.0148; Registry Number: [143328-17-0].

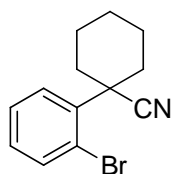

**1-(2-Bromophenyl)cyclohexanecarbonitrile (1r):**<sup>11</sup> Prepared according to the

general procedure B, 94% isolated yield; Colorless oil; IR (KBr): 3459, 2935, 1637, 1469, 1454, 1385, 1009, 735  $\text{cm}^{-1}$ ;  $^1\text{H}$  NMR (300 MHz,  $\text{CDCl}_3$ ):  $\delta$  7.67 (dd,  $J_1 = 7.8$  Hz,  $J_2 = 1.2$  Hz, 1H), 7.45 (dd,  $J_1 = 8.1$  Hz,  $J_2 = 1.8$  Hz, 1H), 7.35 (td,  $J_1 = 8.1$  Hz,  $J_2 = 1.2$  Hz, 1H), 7.18 (td,  $J_1 = 7.2$  Hz,  $J_2 = 1.8$  Hz, 1H), 2.57 (d,  $J = 11.1$  Hz, 2H), 2.04–1.77 (m, 7H), 1.33–1.26 (m, 1H);  $^{13}\text{C}$  NMR (75 MHz,  $\text{CDCl}_3$ ):  $\delta$  138.4, 135.8, 129.4, 127.9, 127.4, 123.0, 121.0, 43.8, 35.0, 25.0, 23.2; HRMS:  $\text{C}_{13}\text{H}_{14}\text{BrN}$  calculated 263.0310, found 263.0311; Registry Number: [106795-74-8].

### Preparation of 4-(2-bromophenyl)tetrahydro-2H-pyran-4-carbonitrile (**1s**):

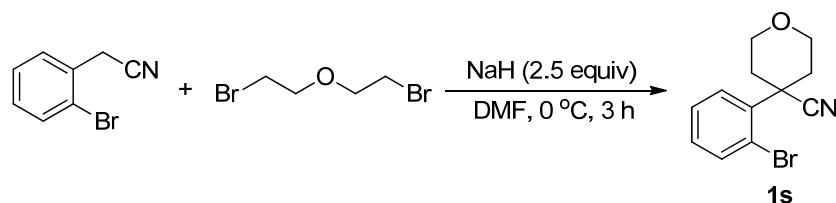

Sodium hydride (NaH, 60% in mineral oil, 200 mg, 5 mmol) was washed by dry hexane for several times, the hexane was removed and dry DMF (3 mL) was then added and kept stirring at 0 °C. The solution of 2-(2-bromophenyl)acetonitrile (390 mg, 2 mmol) in DMF (1 mL) was added to the NaH/DMF suspension and kept stirring at 0 °C for 3 h. The reaction mixture was filtered and purified by column chromatography to get compound **1s** in 47% isolated yield; White solid, mp: 95–97 °C; IR (KBr): 3460, 2964, 2931, 2858, 2768, 2703, 2233, 1635, 1469, 1114, 755  $\text{cm}^{-1}$ ;  $^1\text{H}$  NMR (300 MHz,  $\text{CDCl}_3$ ):  $\delta$  7.66 (d,  $J = 7.8$  Hz, 1H), 7.36 (d,  $J = 4.2$  Hz, 2H), 7.23–7.17 (m, 1H), 4.07 (dd,  $J_1 = 11.4$  Hz,  $J_2 = 4.2$  Hz, 2H), 3.96 (td,  $J_1 = 12.3$  Hz,  $J_2 = 1.5$  Hz, 2H), 2.50 (dd,  $J_1 = 11.7$  Hz,  $J_2 = 1.2$  Hz, 2H), 2.11 (td,  $J_1 = 13.2$  Hz,  $J_2 = 4.5$  Hz, 2H);  $^{13}\text{C}$  NMR (75 MHz,  $\text{CDCl}_3$ ):  $\delta$  136.7, 135.7, 129.7, 128.0, 127.2, 122.7, 119.9, 64.4, 41.3, 34.5; HRMS:  $\text{C}_{12}\text{H}_{12}\text{BrNO}$  calculated 265.0102, found 265.0103; New compound.

### Preparation of 8-(2-bromophenyl)-1,4-dioxaspiro[4.5]decane-8-carbonitrile (**1t**):

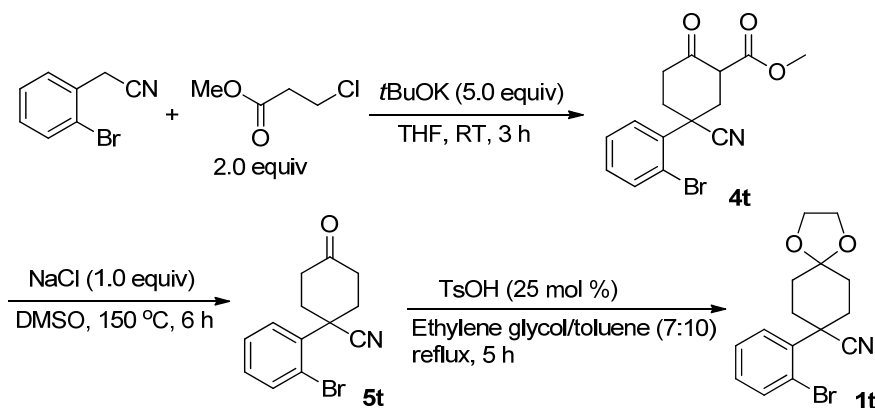

**Methyl 5-(2-bromophenyl)-5-cyano-2-oxocyclohexanecarboxylate (4t):** To a suspension of potassium *tert*-butoxide (KO<sup>t</sup>Bu, 1122 mg, 10 mmol) in THF (5 mL) was added 2-(2-bromophenyl)acetonitrile (390 mg, 2 mmol) and methyl 3-chloropropionate (490 mg, 4 mmol). The mixture was kept stirring for 3 h at room temperature, quenched, extracted by HCl/CH<sub>2</sub>Cl<sub>2</sub> for three times and collected the combined organic layer. Purification by the column chromatography to provide the compound **4t** in 52% isolated yield; Yellow oil; IR (KBr): 3427, 2923, 1636, 1572, 1470, 1439, 1124, 755 cm<sup>-1</sup>; <sup>1</sup>H NMR (300 MHz, CDCl<sub>3</sub>): δ 12.23 (s, 1H), 7.70 (dd, *J*<sub>1</sub> = 7.8 Hz, *J*<sub>2</sub> = 0.9 Hz, 1H), 7.43 (dd, *J*<sub>1</sub> = 7.8 Hz, *J*<sub>2</sub> = 1.5 Hz, 1H), 7.36 (td, *J*<sub>1</sub> = 6.6 Hz, *J*<sub>2</sub> = 1.2 Hz, 1H), 7.22 (td, *J*<sub>1</sub> = 7.8 Hz, *J*<sub>2</sub> = 1.5 Hz, 1H), 3.80 (s, 3H), 3.40 (d, *J* = 16.2 Hz, 1H), 2.85–2.78 (m, 2H), 2.56–2.48 (m, 2H), 2.45–2.36 (m, 1H); <sup>13</sup>C NMR (75 MHz, CDCl<sub>3</sub>): δ 171.8, 170.6, 135.9, 130.0, 128.0, 127.7, 122.7, 120.5, 94.4, 51.8, 40.8, 32.1, 29.6, 26.7; HRMS: C<sub>15</sub>H<sub>14</sub>BrNO<sub>3</sub> calculated 335.0157, found 335.0153; New compound.

**1-(2-Bromophenyl)-4-oxocyclohexanecarbonitrile (5t):** To a solution of NaCl (117 mg, 2 mmol) in DMSO (4 mL) was added **4t** (670 mg, 2 mmol) and stirred at 150 °C for 6 h under nitrogen atmosphere, quenched, extracted by HCl/CH<sub>2</sub>Cl<sub>2</sub> for 3 times and collected the combined organic layer. Purification by the column chromatography to provide the compound **5t** in 94% isolated yield; Yellow solid, mp: 95–96 °C; IR (KBr): 3461, 2924, 1719, 1647, 1637, 1466, 1427, 1339, 758 cm<sup>-1</sup>; <sup>1</sup>H NMR (600 MHz, CDCl<sub>3</sub>): δ 7.70 (dd, *J*<sub>1</sub> = 7.8 Hz, *J*<sub>2</sub> = 1.2 Hz, 1H), 7.43 (dd, *J*<sub>1</sub> = 8.4 Hz, *J*<sub>2</sub> = 1.8 Hz, 1H), 7.37 (td, *J*<sub>1</sub> = 8.4 Hz, *J*<sub>2</sub> = 0.6 Hz, 1H), 7.24 (td, *J*<sub>1</sub> = 8.4 Hz, *J*<sub>2</sub> = 1.2 Hz, 1H), 2.95 (td, *J*<sub>1</sub> = 15.0 Hz, *J*<sub>2</sub> = 6.0 Hz, 2H), 2.90–2.87 (m, 2H), 2.60–2.57 (m, 2H), 2.29 (td, *J*<sub>1</sub> = 13.8 Hz, *J*<sub>2</sub> = 4.2 Hz, 2H); <sup>13</sup>C NMR (150 MHz, CDCl<sub>3</sub>): δ 207.0, 135.9 (2C), 130.1, 128.2, 127.1, 123.0, 119.5, 42.4, 38.0, 34.4; HRMS: C<sub>13</sub>H<sub>12</sub>BrNO calculated 277.0102, found 277.0100; New compound.

**8-(2-Bromophenyl)-1,4-dioxaspiro[4.5]decane-8-carbonitrile (1t):** White solid, mp: 114–116 °C; IR (KBr): 3459, 2286, 1638, 1109, 1032, 719 cm<sup>-1</sup>; <sup>1</sup>H NMR (600 MHz, CDCl<sub>3</sub>): δ 7.67 (dd, *J*<sub>1</sub> = 7.8 Hz, *J*<sub>2</sub> = 1.2 Hz, 1H), 7.45 (dd, *J*<sub>1</sub> = 7.8 Hz, *J*<sub>2</sub> = 1.2 Hz, 1H), 7.34 (td, *J*<sub>1</sub> = 7.2 Hz, *J*<sub>2</sub> = 1.2 Hz, 1H), 7.20 (td, *J*<sub>1</sub> = 7.8 Hz, *J*<sub>2</sub> = 1.8 Hz, 1H), 4.01 (t, *J* = 6.0 Hz, 2H), 3.95 (t, *J* = 6.0 Hz, 2H), 2.59–2.57 (m, 2H), 2.22–2.14 (m, 4H), 1.91–1.88 (m, 2H); <sup>13</sup>C NMR (150 MHz, CDCl<sub>3</sub>): δ 137.3, 135.8, 129.6, 127.9, 127.3, 123.2, 120.3, 107.0, 64.6, 64.3, 42.7, 32.5, 32.1; HRMS: C<sub>15</sub>H<sub>16</sub>BrNO<sub>2</sub> calculated 321.0364, found 321.0364; New compound.



### Preparation of 2-(2-bromophenyl)-2,3-dihydro-1H-indene-2-carbonitrile (**1u**):

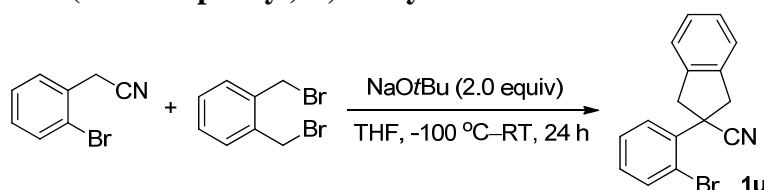

To a suspension of sodium *tert*-butoxide (NaOtBu, 384 mg, 4 mmol) in THF (5 mL) was added 2-(2-bromophenyl)acetonitrile (390 mg, 2 mmol) and kept stirring for a while at -100 °C. The solution of 1,2-bis(bromomethyl)benzene (528 mg, 2 mmol) in THF (1 mL) was then slowly added into the suspension for 30 min at -100 °C. The reaction mixture was then warmed up room temperature and kept stirring for 24 h, quenched, extracted by NaHCO<sub>3</sub>/toluene for three times and collected the combined organic layer. Purification by the column chromatography to provide the compound **1u** in 42% isolated yield; White solid, mp: 134–135 °C; IR (KBr): 3459, 2922, 2851, 2234, 1636, 1470, 1385, 1023, 757 cm<sup>-1</sup>; <sup>1</sup>H NMR (600 MHz, CDCl<sub>3</sub>): δ 7.69 (dd, *J*<sub>1</sub> = 8.4 Hz, *J*<sub>2</sub> = 1.8 Hz, 1H), 7.49 (dd, *J*<sub>1</sub> = 7.8 Hz, *J*<sub>2</sub> = 1.2 Hz, 1H), 7.31–7.24 (m, 5H), 7.20 (td, *J*<sub>1</sub> = 7.8 Hz, *J*<sub>2</sub> = 1.2 Hz, 1H), 3.92 (d, *J* = 15.6 Hz, 2H), 3.81 (d, *J* = 15.6 Hz, 2H); <sup>13</sup>C NMR (150 MHz, CDCl<sub>3</sub>): δ 138.9, 136.2, 135.5, 129.8, 128.6, 127.7, 127.6, 124.5, 123.1, 123.1, 47.8, 44.8; HRMS: C<sub>16</sub>H<sub>12</sub>BrN calculated 297.0153, found 297.0157; New compound.

### Preparation of 2-(2-bromophenyl)-2-cyclohexylideneacetonitrile (**1v**):

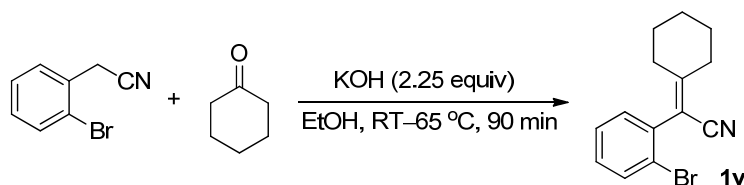

To a solution of potassium hydroxide (KOH, 253 mg, 4.5 mmol) in EtOH (1 mL) was added 2-(2-bromophenyl)acetonitrile (390 mg, 2 mmol) and kept stirring under nitrogen atmosphere for a while at room temperature. Cyclohexanone (216 mg, 2.2 mmol) was then slowly injected into the reaction mixture and kept stirring at 65 °C for 90 min, filtered to remove the salt and isolated by column chromatography to provide **1v** in 47% isolated yield; Colorless oil, IR (KBr): 3499, 3058, 2934, 2857, 2210, 1625, 1470, 1443, 1028, 982, 755 cm<sup>-1</sup>; <sup>1</sup>H NMR (600 MHz, CDCl<sub>3</sub>): δ 7.61 (d, *J* = 7.8 Hz, 1H), 7.32 (td, *J*<sub>1</sub> = 8.4 Hz, *J*<sub>2</sub> = 1.2 Hz, 1H), 7.21 (td, *J*<sub>1</sub> = 9.6 Hz, *J*<sub>2</sub> = 1.8 Hz, 2H), 2.73–2.62 (m, 2H), 2.07–1.99 (m, 2H), 1.80–1.75 (m, 2H), 1.62–1.60 (m, 3H), 1.54–1.51 (m, 1H); <sup>13</sup>C NMR (150 MHz, CDCl<sub>3</sub>): δ 163.9, 134.4, 133.0, 131.3, 130.0, 127.6, 124.1, 117.0, 106.6, 34.4, 31.4, 27.8, 27.3, 25.7; HRMS: C<sub>14</sub>H<sub>14</sub>BrN calculated 275.0310, found 275.0313; New compound.



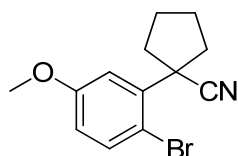

**1-(2-Bromo-5-methoxyphenyl)cyclopentanecarbonitrile (1C):** Prepared according to the general procedure B by using **5d** as starting material, 90% isolated yield; Colorless oil; IR (KBr): 3450, 2960, 2877, 2232, 1594, 1271, 1466, 1293, 1243, 1017, 810, 603  $\text{cm}^{-1}$ ;  $^1\text{H}$  NMR (300 MHz,  $\text{CDCl}_3$ ):  $\delta$  7.55 (d,  $J = 8.7$  Hz, 1H), 6.98 (d,  $J = 3.0$  Hz, 1H), 6.73 (dd,  $J_1 = 8.7$  Hz,  $J_2 = 3.0$  Hz, 1H), 3.80 (s, 3H), 2.74–2.69 (m, 2H), 2.21–2.17 (m, 2H), 2.04–2.00 (m, 2H), 1.92–1.88 (m, 2H);  $^{13}\text{C}$  NMR (75 MHz,  $\text{CDCl}_3$ ):  $\delta$  159.4, 139.0, 136.2, 123.4, 115.6, 114.4, 114.2, 56.1, 48.1, 38.7, 24.2; HRMS:  $\text{C}_{13}\text{H}_{14}\text{BrNO}$  calculated 279.0259, found 279.0263; New compound.

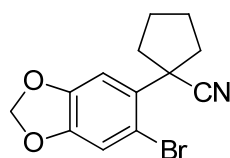

**1-(6-Bromobenzo[d][1,3]dioxol-5-yl)cyclopentanecarbonitrile (1D):** Prepared according to the general procedure B by using **5e** as starting material, 72% isolated yield; White solid, mp: 83–85  $^{\circ}\text{C}$ ; IR (KBr): 3458, 2957, 2919, 2877, 2230, 1637, 1506, 1481, 1238, 1038  $\text{cm}^{-1}$ ;  $^1\text{H}$  NMR (600 MHz,  $\text{CDCl}_3$ ):  $\delta$  7.11 (s, 1H), 6.89 (s, 1H), 6.00 (s, 2H), 2.74–2.70 (m, 2H), 2.13–2.08 (m, 2H), 2.03–2.00 (m, 2H), 1.89–1.87 (m, 2H);  $^{13}\text{C}$  NMR (150 MHz,  $\text{CDCl}_3$ ):  $\delta$  147.9, 147.4, 130.8, 122.8, 114.9, 114.7, 107.9, 102.1, 47.3, 38.5, 23.5; HRMS:  $\text{C}_{13}\text{H}_{12}\text{BrNO}_2$  calculated 293.0051, found 293.0050; New compound.

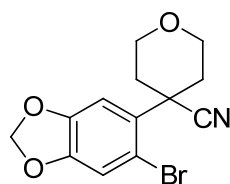

**4-(6-Bromobenzo[d][1,3]dioxol-5-yl)tetrahydro-2H-pyran-4-carbonitrile (1E):** Prepared according to the general procedure B by using **5e** as starting material, 76% isolated yield; White solid, mp: 120–122  $^{\circ}\text{C}$ ; IR (KBr): 3474, 2980, 2909, 2838, 1631, 1474, 1273, 760, 513  $\text{cm}^{-1}$ ;  $^1\text{H}$  NMR (600 MHz,  $\text{CDCl}_3$ ):  $\delta$  7.12 (s, 1H), 6.87 (s, 1H), 6.02 (s, 2H), 4.07 (dd,  $J_1 = 12$  Hz,  $J_2 = 3.6$  Hz, 2H), 3.96 (td,  $J_1 = 12.6$  Hz,  $J_2 = 1.8$  Hz, 2H), 2.50 (dd,  $J_1 = 12.6$  Hz,  $J_2 = 0.6$  Hz, 2H), 2.04 (td,  $J_1 = 13.2$  Hz,  $J_2 = 4.2$  Hz, 2H);  $^{13}\text{C}$  NMR (150 MHz,  $\text{CDCl}_3$ ):  $\delta$  148.1, 148.0, 130.1, 120.0, 115.5, 113.8, 107.3, 102.3, 64.6, 41.0, 35.1. HRMS:  $\text{C}_{13}\text{H}_{12}\text{BrNO}_3$  calculated 309.0001, found 309.0005; New

compound.

**Preparation of 2-(2-bromophenyl)-2-methylpropanamide (**3a**):**<sup>12</sup>

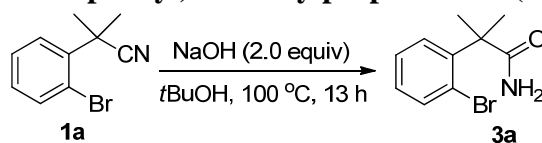

To a screw-capped vial (25 mL) were added NaOH (400 mg, 10 mmol), *tert*-butanol (*t*BuOH, 10 mL) and **1a** (1.12 g, 5 mmol). The vial was sealed with cap and allowed to stir at 100 °C. The reaction was monitored by TLC every hour until the complete consumption of **1a**. After total conversion of **1a**, the reaction was diluted with CH<sub>2</sub>Cl<sub>2</sub>, filtered through a thin Celite pad to remove salt, and concentrated *in vacuo*. The residue was isolated through a short flash column chromatography by using ethyl acetate as eluent to give the pure compound **3a** in 92% isolated yield; Colorless oil (high viscosity); IR (KBr): 3472, 2977, 2932, 1669, 1605, 1468, 1427, 1390, 1360, 1022, 756 cm<sup>-1</sup>; <sup>1</sup>H NMR (600 MHz, CDCl<sub>3</sub>): δ 7.60 (dd, *J*<sub>1</sub> = 7.8 Hz, *J*<sub>2</sub> = 1.2 Hz, 1H), 7.49 (dd, *J*<sub>1</sub> = 7.8 Hz, *J*<sub>2</sub> = 1.2 Hz, 1H), 7.34 (td, *J*<sub>1</sub> = 7.8 Hz, *J*<sub>2</sub> = 1.2 Hz, 1H), 7.14 (td, *J*<sub>1</sub> = 7.8 Hz, *J*<sub>2</sub> = 1.8 Hz, 1H), 5.72 (br, 1H), 5.23 (br, 1H), 1.65 (s, 6H); <sup>13</sup>C NMR (150 MHz, CDCl<sub>3</sub>): δ 179.0, 143.0, 134.8, 128.6, 127.7, 127.6, 124.1, 48.3, 26.4; HRMS: C<sub>10</sub>H<sub>12</sub>BrNO calculated 241.0102, found 241.0098; Registry Number: [173026-22-7].

## Experimental Details for all products

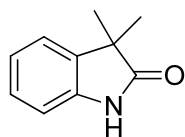

**3,3-Dimethylindolin-2-one (2a):**<sup>13</sup> White solid, mp: 182–184 °C; IR (KBr): 3450, 3096, 1717, 1676, 1410, 1226, 1172, 738, 618, 492 cm<sup>-1</sup>; <sup>1</sup>H NMR (600 MHz, CDCl<sub>3</sub>): δ 8.62 (br, 1H), 7.20 (t, *J* = 7.8 Hz, 2H), 7.04 (t, *J* = 7.8 Hz, 1H), 6.94 (d, *J* = 7.2 Hz, 1H), 1.41 (s, 6H); <sup>13</sup>C NMR (150 MHz, CDCl<sub>3</sub>): δ 183.9, 139.8, 136.3, 127.6, 122.6, 122.4, 109.8, 44.6, 24.3; HRMS: C<sub>10</sub>H<sub>11</sub>NO calculated 161.0841, found 161.0838; Registry Number: [19155-24-9].

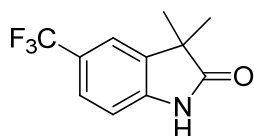

**3,3-Dimethyl-5-(trifluoromethyl)indolin-2-one (2b):** White solid, mp: 152–154 °C; IR (KBr): 3450, 2930, 2880, 1729, 1629, 1339, 1095, 897, 816, 779, 537 cm<sup>-1</sup>; <sup>1</sup>H NMR (600 MHz, CDCl<sub>3</sub>): δ 8.89 (br, 1H), 7.50 (d, *J* = 8.4 Hz, 1H), 7.43 (s, 1H), 7.02 (d, *J* = 7.8 Hz, 1H), 1.44 (s, 6H); <sup>13</sup>C NMR (150 MHz, CDCl<sub>3</sub>): δ 183.8, 142.9, 136.7, 125.5, 125.0 (q, *J* = 31.5 Hz), 124.4 (q, *J* = 270 Hz), 119.8, 109.7, 44.8, 24.2; HRMS: C<sub>11</sub>H<sub>10</sub>F<sub>3</sub>NO calculated 229.0714, found 229.0715; New compound.

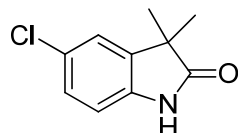

**5-Chloro-3,3-dimethylindolin-2-one (2c):**<sup>14</sup> White solid, mp: 162–164 °C; IR (KBr): 3468, 3167, 2874, 2926, 2853, 2304, 1731, 1670, 1481, 1204 cm<sup>-1</sup>; <sup>1</sup>H NMR (600 MHz, CDCl<sub>3</sub>): δ 9.14 (br, 1H), 7.18–7.16 (m, 2H), 6.88 (d, *J* = 8.4 Hz, 1H), 1.40 (s, 6H); <sup>13</sup>C NMR (150 MHz, CDCl<sub>3</sub>): δ 183.9, 138.4, 138.0, 127.9, 127.6, 123.2, 110.9, 45.1, 24.2; HRMS: C<sub>10</sub>H<sub>10</sub>ClNO calculated 195.0451, found 195.0453; Registry Number: [74492-46-9].

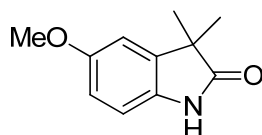

**5-Methoxy-3,3-dimethylindolin-2-one (2d):** White solid, mp: 154–156 °C; IR(KBr): 3483, 2966, 1702, 1452, 1029, 596 cm<sup>-1</sup>; <sup>1</sup>H NMR (600 MHz, CDCl<sub>3</sub>): δ 8.14 (br, 1H), 6.83–6.79 (m, 2H), 6.73 (dd, *J*<sub>1</sub> = 8.4 Hz, *J*<sub>2</sub> = 2.4 Hz, 1H), 3.79 (s, 3H), 1.39 (s, 6H);

$^{13}\text{C}$  NMR (150 MHz,  $\text{CDCl}_3$ ):  $\delta$  183.5, 155.9, 137.7, 133.0, 111.9, 110.1, 110.0, 55.8, 45.1, 24.4; HRMS:  $\text{C}_{11}\text{H}_{13}\text{NO}_2$  calculated 191.0946, found 191.0951; Registry Number: [87234-57-7].

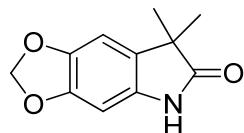

**7,7-Dimethyl-5H-[1,3]dioxolo[4,5-f]indol-6(7H)-one (2e):** White solid, mp: 244–246 °C; IR (KBr): 3467, 2925, 2284, 1701, 1476, 1118, 1035, 680, 486  $\text{cm}^{-1}$ ;  $^1\text{H}$  NMR (600 MHz,  $\text{CDCl}_3$ ):  $\delta$  8.63 (br, 1H), 6.70 (s, 1H), 6.53 (s, 1H), 5.91 (s, 2H), 1.36 (s, 6H);  $^{13}\text{C}$  NMR (150 MHz,  $\text{CDCl}_3$ ):  $\delta$  184.4, 146.8, 143.2, 133.5, 128.2, 104.1, 100.9, 93.6, 45.0, 24.5; HRMS:  $\text{C}_{11}\text{H}_{11}\text{NO}_3$  calculated 205.0739, found 205.0740; New compound.

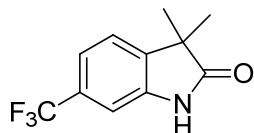

**3,3-Dimethyl-6-(trifluoromethyl)indolin-2-one (2f):** White solid, mp: 180–181 °C; IR (KBr): 3449, 2970, 2637, 1676, 1460, 1355, 1157, 1052, 640, 519  $\text{cm}^{-1}$ ;  $^1\text{H}$  NMR (600 MHz,  $\text{CDCl}_3$ ):  $\delta$  9.35 (br, 1H), 7.33 (d,  $J = 7.8$  Hz, 1H), 7.29 (d,  $J = 7.8$  Hz, 1H), 7.21 (s, 1H), 1.44 (s, 6H);  $^{13}\text{C}$  NMR (150 MHz,  $\text{CDCl}_3$ ):  $\delta$  184.0, 140.4, 140.0, 130.3 (q,  $J = 31.5$  Hz), 124.0 (q,  $J = 270$  Hz), 122.8, 119.6 (d,  $J = 3$  Hz), 106.9 (d,  $J = 3$  Hz), 44.9, 24.1; HRMS:  $\text{C}_{11}\text{H}_{10}\text{F}_3\text{NO}$  calculated 229.0714, found 229.0712; New compound.

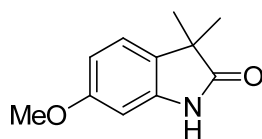

**6-Methoxy-3,3-dimethylindolin-2-one (2g):** White solid, mp: 167–169 °C; IR (KBr): 3856, 3449, 3192, 2969, 1712, 1672, 1384, 1351, 1157, 740, 572  $\text{cm}^{-1}$ ;  $^1\text{H}$  NMR (600 MHz,  $\text{CDCl}_3$ ):  $\delta$  8.42 (br, 1H), 7.07 (d,  $J = 7.8$  Hz, 1H), 6.56 (dd,  $J_1 = 7.8$  Hz,  $J_2 = 1.8$  Hz, 1H), 6.53 (d,  $J = 2.4$  Hz, 1H), 3.80 (s, 3H), 1.38 (s, 6H);  $^{13}\text{C}$  NMR (150 MHz,  $\text{CDCl}_3$ ):  $\delta$  184.4, 159.7, 140.7, 128.3, 123.2, 107.2, 97.2, 55.5, 44.2, 24.5; HRMS:  $\text{C}_{11}\text{H}_{13}\text{NO}_2$  calculated 191.0946, found 191.0948; New compound.

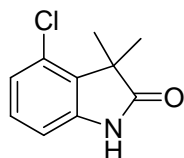

**4-Chloro-3,3-dimethylindolin-2-one (2h):** White solid, mp: 136–138 °C; IR (KBr): 3469, 3152, 2826, 1723, 1676, 1619, 1247, 1188, 661  $\text{cm}^{-1}$ ;  $^1\text{H}$  NMR (600 MHz,  $\text{CDCl}_3$ ):  $\delta$  9.50 (br, 1H), 7.13 (t,  $J = 7.8$  Hz, 1H), 6.97 (dd,  $J_1 = 7.8$  Hz,  $J_2 = 0.6$  Hz, 1H), 6.88 (dd,  $J_1 = 7.8$  Hz,  $J_2 = 0.6$  Hz, 1H), 1.55 (s, 6H);  $^{13}\text{C}$  NMR (150 MHz,  $\text{CDCl}_3$ ):  $\delta$  183.8, 141.7, 132.0, 130.6, 128.9, 123.5, 108.6, 46.3, 21.3; HRMS:  $\text{C}_{10}\text{H}_{10}\text{ClNO}$  calculated 195.0451, found 195.0454; New compound.

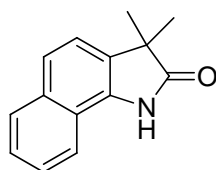

**3,3-Dimethyl-1H-benzo[g]indol-2(3H)-one (2i):** White solid, mp: 222–224 °C; IR (KBr): 3468, 2970, 1703, 1459, 1197, 812, 558  $\text{cm}^{-1}$ ;  $^1\text{H}$  NMR (600 MHz,  $\text{CDCl}_3$ ):  $\delta$  7.97 (d,  $J = 8.4$  Hz, 1H), 7.87 (d,  $J = 8.4$  Hz, 1H), 7.61 (d,  $J = 8.4$  Hz, 1H), 7.57 (t,  $J = 6.6$  Hz, 1H), 7.49 (t,  $J = 6.6$  Hz, 1H), 7.38 (d,  $J = 7.8$  Hz, 1H), 2.17 (br, 1H), 1.53 (s, 6H);  $^{13}\text{C}$  NMR (150 MHz,  $\text{CDCl}_3$ ):  $\delta$  185.7, 135.7, 133.3, 130.8, 128.6, 126.1, 125.8, 122.4, 121.6, 120.2, 119.8, 46.0, 24.2; HRMS:  $\text{C}_{14}\text{H}_{13}\text{NO}$  calculated 211.0997, found 211.0994; New compound.

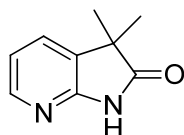

**3,3-Dimethyl-1H-pyrrolo[2,3-b]pyridin-2(3H)-one (2j):** White solid, mp: 182–184 °C; IR (KBr): 3450, 3114, 2966, 2874, 1731, 1613, 1466, 1200, 1153, 777  $\text{cm}^{-1}$ ;  $^1\text{H}$  NMR (600 MHz,  $\text{CDCl}_3$ ):  $\delta$  8.16 (dd,  $J_1 = 5.4$  Hz,  $J_2 = 1.8$  Hz, 1H), 7.44 (dd,  $J_1 = 7.2$  Hz,  $J_2 = 1.2$  Hz, 1H), 6.96 (dd,  $J_1 = 7.2$  Hz,  $J_2 = 5.4$  Hz, 1H), 1.87 (br, 1H), 1.42 (s, 6H);  $^{13}\text{C}$  NMR (150 MHz,  $\text{CDCl}_3$ ):  $\delta$  182.1, 155.6, 146.1, 130.5, 130.4, 118.1, 44.6, 23.8; HRMS:  $\text{C}_9\text{H}_{10}\text{N}_2\text{O}$  calculated 162.0793, found 162.0794; Registry Number: [109535-73-1].

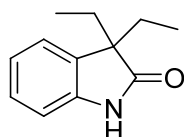

**3,3-Diethylindolin-2-one (2k):**<sup>15</sup> White solid, mp: 166–168 °C; IR (KBr): 3873, 3449,



3136, 2969, 2876, 1667, 1344, 1204, 744  $\text{cm}^{-1}$ ;  $^1\text{H}$  NMR (600 MHz,  $\text{CDCl}_3$ ):  $\delta$  8.40 (br, 1H), 7.20 (td,  $J_1 = 7.8$  Hz,  $J_2 = 1.2$  Hz, 1H), 7.12 (d,  $J = 6.6$  Hz, 1H), 7.06 (td,  $J_1 = 7.8$  Hz,  $J_2 = 1.2$  Hz, 1H), 6.91 (d,  $J = 7.8$  Hz, 1H), 1.96–1.90 (m, 2H), 1.83–1.78 (m, 2H), 0.64 (t,  $J = 7.8$  Hz, 6H);  $^{13}\text{C}$  NMR (150 MHz,  $\text{CDCl}_3$ ):  $\delta$  182.5, 141.3, 132.4, 127.6, 123.1, 122.4, 109.5, 54.9, 30.6, 8.7; HRMS:  $\text{C}_{12}\text{H}_{15}\text{NO}$  calculated 189.1154, found 189.1159; Registry Number: [53204-33-4].

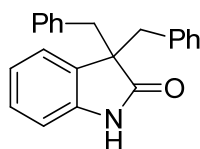

**3,3-Dibenzylindolin-2-one (2l):**<sup>16</sup> White solid, mp: 218–220 °C; IR (KBr): 3450, 3083, 2919, 2854, 1718, 1625, 1241, 754, 696, 556  $\text{cm}^{-1}$ ;  $^1\text{H}$  NMR (600 MHz,  $\text{CDCl}_3$ ):  $\delta$  7.18–7.17 (m, 2H), 7.09–7.00 (m, 8H), 6.93 (dd,  $J_1 = 7.8$  Hz,  $J_2 = 1.2$  Hz, 4H), 6.45 (dd,  $J_1 = 7.2$  Hz,  $J_2 = 1.2$  Hz, 1H), 3.31 (d,  $J = 13.2$  Hz, 2H), 3.17 (d,  $J = 13.2$  Hz, 2H);  $^{13}\text{C}$  NMR (150 MHz,  $\text{CDCl}_3$ ):  $\delta$  180.1, 140.5, 135.8, 130.6, 130.1, 127.8, 127.7, 126.5, 124.8, 121.7, 109.2, 56.4, 43.5; HRMS:  $\text{C}_{22}\text{H}_{19}\text{NO}$  calculated 313.1467, found 313.1463; Registry Number: [14192-31-5].

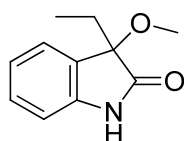

**3-Ethyl-3-methoxyindolin-2-one (2m):** Yellow solid, mp: 160–161 °C; IR (KBr): 3463, 3274, 2984, 2828, 1729, 1621, 1470, 1210, 1139, 765, 706, 646  $\text{cm}^{-1}$ ;  $^1\text{H}$  NMR (600 MHz,  $\text{CDCl}_3$ ):  $\delta$  8.65 (br, 1H), 7.30–7.27 (m, 2H), 7.10 (td,  $J_1 = 7.2$  Hz,  $J_2 = 0.6$  Hz, 1H), 6.93 (d,  $J = 8.4$  Hz, 1H), 3.10 (s, 3H), 2.00 (q,  $J = 7.2$  Hz, 2H), 0.79 (t,  $J = 7.2$  Hz, 3H);  $^{13}\text{C}$  NMR (150 MHz,  $\text{CDCl}_3$ ):  $\delta$  178.8, 141.3, 129.7, 127.4, 124.6, 123.0, 110.3, 84.0, 53.2, 30.7, 7.3; HRMS:  $\text{C}_{11}\text{H}_{13}\text{NO}_2$  calculated 191.0946, found 191.0942; New compound.

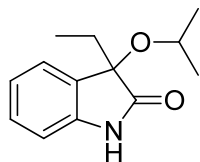

**3-Ethyl-3-isopropoxyindolin-2-one (2n):** White solid, mp: 171–172 °C; IR (KBr): 3449, 2923, 1754, 1689, 1625, 1384, 1107, 747, 497  $\text{cm}^{-1}$ ;  $^1\text{H}$  NMR (600 MHz,  $\text{CDCl}_3$ ):  $\delta$  9.00 (br, 1H), 7.30–7.25 (m, 2H), 7.07 (t,  $J = 7.8$  Hz, 1H), 6.94 (d,  $J = 7.8$  Hz, 1H), 3.46–3.42 (m, 1H), 1.96 (q,  $J = 7.2$  Hz, 2H), 1.12 (d,  $J = 6.0$  Hz, 3H), 0.99 (d,  $J = 6.6$  Hz, 3H), 0.73 (t,  $J = 7.2$  Hz, 3H);  $^{13}\text{C}$  NMR (150 MHz,  $\text{CDCl}_3$ ):  $\delta$  180.1, 141.0,

129.4, 128.8, 124.8, 122.7, 110.3, 83.1, 69.2, 31.6, 24.2, 23.3, 7.1; HRMS:  $C_{13}H_{17}NO_2$  calculated 219.1259, found 219.1261; New compound.

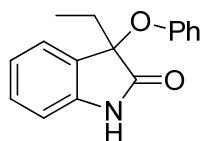

**3-Ethyl-3-phenoxyindolin-2-one (2o):** White solid, mp: 125–127 °C; IR (KBr): 3449, 2923, 1721, 1619, 1544, 1324, 1115, 691, 489  $cm^{-1}$ ;  $^1H$  NMR (600 MHz,  $CDCl_3$ ):  $\delta$  8.42 (br, 1H), 7.28 (d,  $J = 7.2$  Hz, 1H), 7.24 (td,  $J_1 = 7.8$  Hz,  $J_2 = 0.6$  Hz, 1H), 7.07–7.02 (m, 3H), 6.88–6.84 (m, 2H), 6.72 (q,  $J = 8.4$  Hz, 2H), 2.25–2.17 (m, 2H), 0.91 (d,  $J = 7.8$  Hz, 3H);  $^{13}C$  NMR (150 MHz,  $CDCl_3$ ):  $\delta$  177.6, 155.7, 140.2, 129.7, 129.1, 127.8, 124.8, 123.0, 122.7, 119.0, 110.5, 84.1, 32.2, 7.1; HRMS:  $C_{16}H_{15}NO_2$  calculated 253.1103, found 253.1108; New compound.

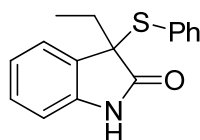

**3-Ethyl-3-(phenylthio)indolin-2-one (2p):** Yellow solid, mp: 134–136 °C; IR (KBr): 3449, 2923, 2853, 1639, 1384, 1118, 742, 492  $cm^{-1}$ ;  $^1H$  NMR (600 MHz,  $CDCl_3$ ):  $\delta$  8.30 (br, 1H), 7.32 (d,  $J = 7.2$  Hz, 1H), 7.24–7.20 (m, 3H), 7.14 (td,  $J_1 = 7.8$  Hz,  $J_2 = 0.6$  Hz, 1H), 7.10–7.06 (m, 3H), 6.67 (d,  $J = 7.8$  Hz, 1H), 2.24–2.17 (m, 1H), 2.16–2.10 (m, 1H), 0.77 (d,  $J = 7.8$  Hz, 3H);  $^{13}C$  NMR (150 MHz,  $CDCl_3$ ):  $\delta$  178.6, 140.6, 136.4, 129.9, 129.5, 129.3, 128.6, 128.3, 124.6, 122.6, 109.7, 60.1, 28.6, 9.3; HRMS:  $C_{16}H_{15}NOS$  calculated 269.0874, found 269.0873; New compound.

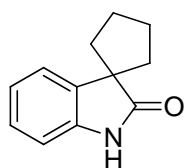

**Spiro[cyclopentane-1,3'-indolin]-2'-one (2q):**<sup>15</sup> White solid, mp: 122–124 °C; IR (KBr): 3449, 2956, 2928, 2281, 1703, 1619, 1384, 747, 492  $cm^{-1}$ ;  $^1H$  NMR (600 MHz,  $CDCl_3$ ):  $\delta$  8.55 (br, 1H), 7.18 (t,  $J = 7.8$  Hz, 2H), 7.02 (td,  $J_1 = 7.8$  Hz,  $J_2 = 1.2$  Hz, 1H), 6.90 (dd,  $J_1 = 7.8$  Hz,  $J_2 = 0.6$  Hz, 1H), 2.20–2.17 (m, 2H), 2.09–2.06 (m, 2H), 2.00–1.98 (m, 2H), 1.90–1.87 (m, 2H);  $^{13}C$  NMR (150 MHz,  $CDCl_3$ ):  $\delta$  184.6, 140.0, 137.4, 127.3, 122.6, 122.5, 109.5, 54.4, 38.4, 26.7; HRMS:  $C_{12}H_{13}NO$  calculated 187.0997, found 187.0993; Registry Number: [41058-67-7].

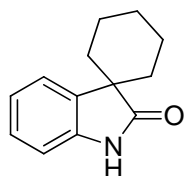

**Spiro[cyclohexane-1,3'-indolin]-2'-one (2r):**<sup>15</sup> White solid, mp: 115–117 °C; IR (KBr): 3468, 2924, 2852, 1701, 1637, 1619, 1385, 1101, 746 cm<sup>-1</sup>; <sup>1</sup>H NMR (600 MHz, CDCl<sub>3</sub>): δ 8.68 (br, 1H), 7.45 (d, *J* = 7.2 Hz, 1H), 7.21 (td, *J*<sub>1</sub> = 7.8 Hz, *J*<sub>2</sub> = 0.6 Hz, 1H), 7.02 (td, *J*<sub>1</sub> = 7.2 Hz, *J*<sub>2</sub> = 0.6 Hz, 1H), 6.94 (d, *J* = 7.8 Hz, 1H), 1.97–1.92 (m, 2H), 1.90–1.85 (m, 2H), 1.80–1.73 (m, 3H), 1.66–1.60 (m, 3H); <sup>13</sup>C NMR (150 MHz, CDCl<sub>3</sub>): δ 183.3, 140.0, 135.8, 127.4, 124.2, 121.8, 109.7, 48.0, 32.9, 25.2, 21.1; HRMS: C<sub>13</sub>H<sub>15</sub>NO calculated 201.1154, found 201.1156; Registry Number: [4933-14-6].

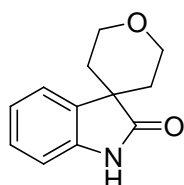

**2',3',5',6'-Tetrahydrospiro[indoline-3,4'-pyran]-2-one (2s):** White solid, mp: 238–240 °C; IR (KBr): 3568, 3447, 2913, 1700, 1624, 1559, 1092 cm<sup>-1</sup>; <sup>1</sup>H NMR (600 MHz, CDCl<sub>3</sub>): δ 8.17 (br, 1H), 7.36 (d, *J* = 7.8 Hz, 1H), 7.23 (t, *J* = 6.6 Hz, 1H), 7.06 (t, *J* = 7.8 Hz, 1H), 6.92 (d, *J* = 7.8 Hz, 1H), 4.27–4.23 (m, 2H), 3.96–3.92 (m, 2H), 1.94–1.86 (m, 4H); <sup>13</sup>C NMR (150 MHz, CDCl<sub>3</sub>): δ 181.8, 139.8, 134.6, 128.0, 123.5, 122.5, 109.7, 62.9, 44.6, 32.9; HRMS: C<sub>12</sub>H<sub>13</sub>NO<sub>2</sub> calculated 203.0946, found 203.0944; Registry Number: [304876-29-7].

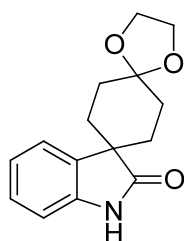

**Dispiro[1,3-dioxolane-2,1'-cyclohexane-4',3''-[3H]indol]-2''(1''H)-one (2t):** White solid, mp: 214–215 °C; IR (KBr): 3468, 2958, 2925, 2854, 1700, 1620, 1444, 1094, 750, 488 cm<sup>-1</sup>; <sup>1</sup>H NMR (600 MHz, CDCl<sub>3</sub>): δ 9.34 (br, 1H), 7.35 (d, *J* = 7.2 Hz, 1H), 7.20 (t, *J* = 7.8 Hz, 1H), 7.00 (t, *J* = 7.8 Hz, 1H), 6.96 (d, *J* = 7.8 Hz, 1H), 4.03 (s, 4H), 2.30–2.24 (m, 2H), 2.05–2.00 (m, 2H), 1.93–1.86 (m, 4H); <sup>13</sup>C NMR (150 MHz, CDCl<sub>3</sub>): δ 183.1, 140.2, 134.9, 127.7, 123.3, 122.0, 109.9, 108.1, 64.3, 46.5, 31.2, 30.1; HRMS: C<sub>15</sub>H<sub>17</sub>NO<sub>3</sub> calculated 259.1208, found 259.1202; Registry Number: [52140-55-3].

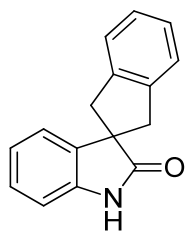

**1,3-Dihydrospiro[indene-2,3'-indolin]-2'-one (2u):** White solid, mp: 210–212 °C; IR (KBr): 3464, 3187, 1707, 1459, 1225, 1009, 749, 643  $\text{cm}^{-1}$ ;  $^1\text{H}$  NMR (600 MHz,  $\text{CDCl}_3$ ):  $\delta$  8.71 (br, 1H), 7.28–7.24 (m, 4H), 7.18 (t,  $J = 7.8$  Hz, 1H), 6.93 (d,  $J = 7.8$  Hz, 1H), 6.89 (t,  $J = 7.8$  Hz, 1H), 6.83 (d,  $J = 7.8$  Hz, 1H), 3.65 (d,  $J = 16.2$  Hz, 2H), 3.13 (d,  $J = 15.6$  Hz, 2H);  $^{13}\text{C}$  NMR (150 MHz,  $\text{CDCl}_3$ ):  $\delta$  182.6, 141.1, 139.6, 136.7, 128.0, 127.0, 124.5, 122.8, 121.9, 109.8, 54.5, 44.0; HRMS:  $\text{C}_{16}\text{H}_{13}\text{NO}$  calculated 235.0997, found 235.1001; Registry Number: [114727-61-6].

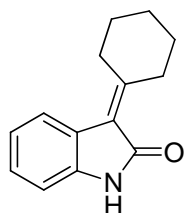

**3-Cyclohexylideneindolin-2-one (2v):**<sup>17</sup> White solid, mp: 204–206 °C; IR (KBr): 3449, 2926, 2854, 1690, 1618, 1467, 1217, 736  $\text{cm}^{-1}$ ;  $^1\text{H}$  NMR (600 MHz,  $\text{CDCl}_3$ ):  $\delta$  8.03 (br, 1H), 7.61 (d,  $J = 7.8$  Hz, 1H), 7.16 (td,  $J_1 = 7.8$  Hz,  $J_2 = 1.2$  Hz, 1H), 6.98 (td,  $J_1 = 7.8$  Hz,  $J_2 = 0.6$  Hz, 1H), 6.84 (d,  $J = 7.2$  Hz, 1H), 3.35 (t,  $J = 6.6$  Hz, 2H), 2.87 (t,  $J = 6.0$  Hz, 2H), 1.86–1.82 (m, 2H), 1.80–1.76 (m, 2H), 1.72–1.68 (m, 2H);  $^{13}\text{C}$  NMR (150 MHz,  $\text{CDCl}_3$ ):  $\delta$  169.9, 164.6, 139.3, 127.5, 124.3, 123.8, 121.5, 120.0, 109.3, 33.1, 30.0, 28.1, 27.8, 25.8; HRMS:  $\text{C}_{14}\text{H}_{15}\text{NO}$  calculated 213.1154, found 213.1153; Registry Number: [3478-78-2].

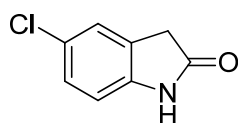

**5-Chloroindolin-2-one (2x):**<sup>18</sup> White solid, mp: 195–196 °C; IR (KBr): 3444, 2900, 1701  $\text{cm}^{-1}$ ;  $^1\text{H}$  NMR (300 MHz,  $\text{CDCl}_3$ ):  $\delta$  8.50 (br, 1H), 7.21–7.18 (m, 2H), 7.01 (d,  $J = 7.8$  Hz, 1H), 3.54 (s, 2H);  $^{13}\text{C}$  NMR (75 MHz,  $\text{CDCl}_3$ ):  $\delta$  176.8, 140.9, 127.9, 127.7, 126.9, 125.1, 110.5, 36.1; HRMS:  $\text{C}_8\text{H}_6\text{ClNO}$  calculated 167.0138, found 167.0144; Registry Number: [17630-75-0].

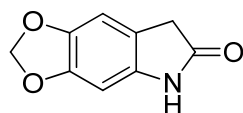

**5H-[1,3]dioxolo[4,5-f]indol-6(7H)-one (2y):** White solid, mp: 228–229 °C; IR (KBr): 742, 1295, 1475, 1720, 2915  $\text{cm}^{-1}$ ;  $^1\text{H}$  NMR (600 MHz,  $\text{CDCl}_3$ ):  $\delta$  7.91 (br, 1H), 6.74 (s, 1H), 6.47 (s, 1H), 5.92 (s, 2H), 3.46 (s, 2H);  $^{13}\text{C}$  NMR (150 MHz,  $\text{CDCl}_3$ ):  $\delta$  177.6, 147.1, 143.1, 136.0, 116.7, 106.1, 100.1, 93.3, 36.4; HRMS:  $\text{C}_8\text{H}_7\text{NO}$  calculated 177.0426, found 177.0429; New compound.

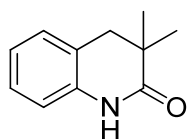

**3,3-Dimethyl-3,4-dihydroquinolin-2(1H)-one (2y):**<sup>19</sup> Yellow solid, mp: 159–161 °C; IR (KBr): 3475, 3195, 3071, 2985, 2923, 1672, 1494, 1389, 762, 670  $\text{cm}^{-1}$ ;  $^1\text{H}$  NMR (600 MHz,  $\text{CDCl}_3$ ):  $\delta$  8.22 (br, 1H), 7.18 (t,  $J = 7.2$  Hz, 1H), 7.14 (d,  $J = 7.2$  Hz, 1H), 7.00 (t,  $J = 7.2$  Hz, 1H), 6.78 (d,  $J = 7.8$  Hz, 1H), 2.81 (s, 2H), 1.22 (s, 6H);  $^{13}\text{C}$  NMR (150 MHz,  $\text{CDCl}_3$ ):  $\delta$  176.9, 136.6, 128.5, 127.4, 123.3, 123.2, 114.8, 40.2, 37.3, 24.3; HRMS:  $\text{C}_{11}\text{H}_{13}\text{NO}$  calculated 175.0997, found 175.0993; Registry Number: [92367-59-4].

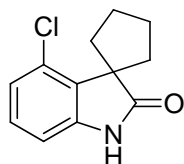

**4'-Chlorospiro[cyclopentane-1,3'-indolin]-2'-one (2A):** White solid, mp: 168–170 °C; IR (KBr): 3487, 3170, 3134, 2957, 2870, 1706, 1619, 1444, 1178, 661  $\text{cm}^{-1}$ ;  $^1\text{H}$  NMR (600 MHz,  $\text{CDCl}_3$ ):  $\delta$  9.25 (br, 1H), 7.11 (t,  $J = 7.8$  Hz, 1H), 6.96 (d,  $J = 7.8$  Hz, 1H), 6.83 (d,  $J = 7.8$  Hz, 1H), 2.33–2.31 (m, 2H), 2.09–2.03 (m, 6H);  $^{13}\text{C}$  NMR (150 MHz,  $\text{CDCl}_3$ ): 185.4, 142.5, 131.9, 129.8, 128.6, 123.4, 108.2, 54.6, 35.0, 27.6; HRMS:  $\text{C}_{12}\text{H}_{12}\text{ClNO}$  calculated 221.0607, found 221.0611; New compound.

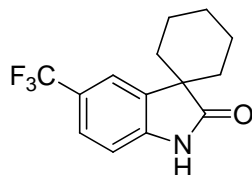

**5'-(Trifluoromethyl)spiro[cyclohexane-1,3'-indolin]-2'-one (2B):** White solid, mp: 182–184 °C; IR (KBr): 3467, 2933, 1724, 1691, 1113, 825  $\text{cm}^{-1}$ ;  $^1\text{H}$  NMR (600 MHz,  $\text{CDCl}_3$ ):  $\delta$  9.11 (br, 1H), 7.64 (s, 1H), 7.51 (d,  $J = 8.4$  Hz, 1H), 7.02 (d,  $J = 7.8$  Hz,

1H), 2.00–1.97 (m, 2H), 1.91–1.86 (m, 2H), 1.77–1.64 (m, 6H); <sup>13</sup>C NMR (150 MHz, CDCl<sub>3</sub>): δ 183.3, 143.1, 136.3, 125.2, 124.5 (q, *J* = 270 Hz), 124.3 (q, *J* = 33 Hz), 121.0, 109.5, 48.0, 32.8, 25.0, 21.0; HRMS: C<sub>14</sub>H<sub>14</sub>F<sub>3</sub>NO calculated 269.1027, found 269.1025; New compound.

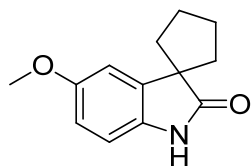

**5'-Methoxyspiro[cyclopentane-1,3'-indolin]-2'-one (2C):** White solid, mp: 180–182 °C; IR (KBr): 3460, 2956, 2862, 1682, 1652, 1635, 1491, 1209, 1029 cm<sup>-1</sup>; <sup>1</sup>H NMR (600 MHz, CDCl<sub>3</sub>): δ 8.86 (br, 1H), 6.82 (dd, *J*<sub>1</sub> = 8.4 Hz, *J*<sub>2</sub> = 1.2 Hz, 1H), 6.79 (d, *J* = 3.0 Hz, 1H), 6.70 (dd, *J*<sub>1</sub> = 8.4 Hz, *J*<sub>2</sub> = 2.4 Hz, 1H), 3.78 (s, 3H), 2.20–2.17 (m, 2H), 2.08–2.05 (m, 2H), 1.98–1.95 (m, 2H), 1.87–1.84 (m, 2H); <sup>13</sup>C NMR (150 MHz, CDCl<sub>3</sub>): δ 184.7, 155.9, 138.8, 133.6, 111.3, 110.2, 109.7, 55.8, 54.9, 38.4, 26.7; HRMS: C<sub>13</sub>H<sub>15</sub>NO<sub>2</sub> calculated 217.1103, found 217.1100; New compound.

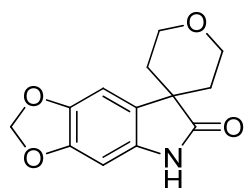

**2',3',5',6'-Tetrahydrospiro[[1,3]dioxolo[4,5-f]indole-7,4'-pyran]-6(5H)-one (2D):** White solid, mp: 276–277 °C; IR (KBr): 3461, 2923, 1721, 1631, 1474, 1267, 1176, 1111, 754, 409 cm<sup>-1</sup>; <sup>1</sup>H NMR (600 MHz, CDCl<sub>3</sub>, bad solubility): δ 7.72 (br, 1H), 6.86 (s, 1H), 6.49 (s, 1H), 5.93 (s, 2H), 4.25–4.21 (m, 2H), 3.91–3.88 (m, 2H), 1.86–1.84 (m, 4H); <sup>13</sup>C NMR (150 MHz, CDCl<sub>3</sub>): δ 182.0, 147.0, 143.2, 133.6, 126.4, 104.9, 101.1, 93.2, 62.8, 44.8, 33.1; HRMS: C<sub>13</sub>H<sub>13</sub>NO<sub>4</sub> calculated 247.0845, found 247.0844; New compound.

## Experimental Details for natural alkaloids

### Synthesis of (±)-coerulescine (**2z**):

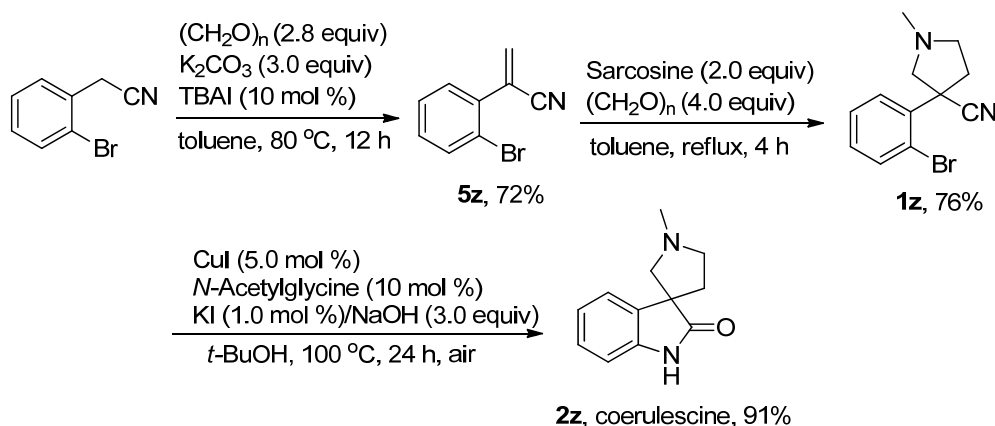

**2-(2-Bromophenyl)acrylonitrile (**5z**):** To a suspension of potassium carbonate ( $\text{K}_2\text{CO}_3$ , 830 mg, 6 mmol) and tetrabutyl ammonium iodide ( $\text{Bu}_4\text{NI}$ , 74 mg, 0.2 mmol) in toluene (4 mL) was added 2-(2-bromophenyl)acetonitrile (390 mg, 2 mmol) and allowed to stir for few minutes. The aqueous formaldehyde ( $\text{CH}_2\text{O}$ , 37% in  $\text{H}_2\text{O}$ , 168 mg, 5.6 mmol) was then slowly injected into the solution over a period of 20 min. The resulting reaction mixture was warmed to 80 °C and kept stirring for 12 h, quenched by  $\text{H}_2\text{O}$  and extracted by toluene for several times. The combined organic layer was collected and dried over anhydrous  $\text{MgSO}_4$ , purified by column chromatography to provide pure compound **5z** in 72% isolated yield; Orange oil; IR (KBr): 3459, 2921, 2851, 2227, 1611, 1471, 1430, 1026, 947, 767, 742  $\text{cm}^{-1}$ ;  $^1\text{H}$  NMR (300 MHz,  $\text{CDCl}_3$ ):  $\delta$  7.58 (d,  $J = 7.8$  Hz, 1H), 7.33–7.29 (m, 2H), 7.25–7.21 (m, 1H), 6.28 (s, 1H), 6.08 (s, 1H);  $^{13}\text{C}$  NMR (75 MHz,  $\text{CDCl}_3$ ):  $\delta$  135.1, 134.3, 133.2, 130.7, 130.3, 127.7, 122.5, 121.5, 116.6; HRMS:  $\text{C}_9\text{H}_6\text{BrN}$  calculated 206.9684, found 206.9681; New compound.

**3-(2-Bromophenyl)-1-methylpyrrolidine-3-carbonitrile (**1z**):** Compound **5z** (416 mg, 2 mmol) was dissolved in toluene (4 mL) and allowed to stir under reflux. The prepared solution of sarcosine (356 mg, 4 mmol) in aqueous formaldehyde ( $\text{CH}_2\text{O}$ , 37% in  $\text{H}_2\text{O}$ , 1 mL) was slowly injected into the solution of **5z** in toluene for the period over 2 h. The reaction mixture was allowed to stir for an additional 2 h, quenched by  $\text{H}_2\text{O}$  and extracted by toluene for several times. The combined organic layer was collected and dried over anhydrous  $\text{MgSO}_4$ , purified by column chromatography to provide pure compound **1z** in 76% isolated yield; Yellow oil; IR (KBr): 3460, 2921, 2850, 2789, 1637, 1471, 1384, 1028, 760  $\text{cm}^{-1}$ ;  $^1\text{H}$  NMR (300 MHz,  $\text{CDCl}_3$ ):  $\delta$  7.66 (dd,  $J_1 = 8.1$  Hz,  $J_2 = 0.9$  Hz, 1H), 7.38 (dd,  $J_1 = 8.1$  Hz,  $J_2 = 1.8$  Hz, 1H), 7.32 (td,  $J_1 = 8.1$  Hz,  $J_2 = 1.2$  Hz, 1H), 7.19 (td,  $J_1 = 7.5$  Hz,  $J_2 = 1.8$  Hz, 1H), 3.42 (d,  $J = 9.9$  Hz, 1H), 3.20 (d,  $J = 9.6$  Hz, 1H), 3.04–2.90 (m, 2H), 2.76–2.67



(m, 1H), 2.46 (s, 4H);  $^{13}\text{C}$  NMR (75 MHz,  $\text{CDCl}_3$ ):  $\delta$  137.1, 135.1, 129.7, 127.7, 127.6, 123.6, 122.7, 65.6, 54.6, 46.0, 41.8, 38.3; HRMS:  $\text{C}_{12}\text{H}_{13}\text{BrN}_2$  calculated 264.0262, found 264.0267; New compound.

**(±)-Coerulescine (2z):**<sup>20</sup> Yellow solid, mp: 129–130 °C; IR (KBr): 3465, 3242, 2944, 2791, 1709, 1620, 1472, 1338, 1197, 753  $\text{cm}^{-1}$ ;  $^1\text{H}$  NMR (600 MHz,  $\text{CDCl}_3$ ):  $\delta$  9.04 (br, 1H), 7.38 (d,  $J$  = 7.8 Hz, 1H), 7.18 (t,  $J$  = 7.8 Hz, 1H), 7.03 (t,  $J$  = 7.8 Hz, 1H), 6.91 (d,  $J$  = 7.8 Hz, 1H), 3.02–2.98 (m, 1H), 2.90 (d,  $J$  = 9.6 Hz, 1H), 2.84–2.78 (m, 2H), 2.46 (s, 3H), 2.44–2.40 (m, 1H), 2.12–2.08 (m, 1H);  $^{13}\text{C}$  NMR (150 MHz,  $\text{CDCl}_3$ ):  $\delta$  183.2, 140.2, 136.3, 127.7, 123.2, 122.7, 109.6, 66.4, 56.8, 53.7, 41.8, 37.9; HRMS:  $\text{C}_{12}\text{H}_{14}\text{N}_2\text{O}$  calculated 202.1106, found 202.1104; Registry Number: [66859-18-5].

### Synthesis of (±)-horsfiline (2E):

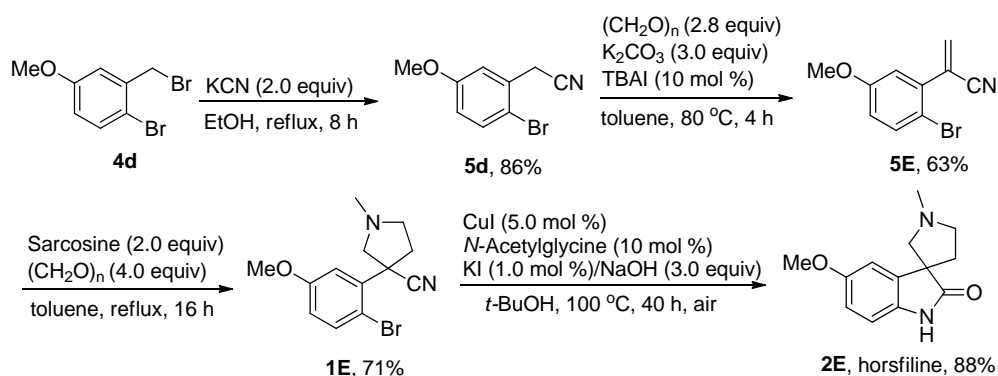

**2-(2-Bromo-5-methoxyphenyl)acrylonitrile (5E):** Procedure is the same with the preparation of 5z, 63% isolated yield; Colorless oil; IR (KBr): 3467, 2921, 2851, 2298, 1637, 1384  $\text{cm}^{-1}$ ;  $^1\text{H}$  NMR (300 MHz,  $\text{CDCl}_3$ ):  $\delta$  7.47 (d,  $J$  = 9.0 Hz, 1H), 6.86 (d,  $J$  = 3.0 Hz, 1H), 6.80 (dd,  $J_1$  = 9.0 Hz,  $J_2$  = 3.0 Hz, 1H), 6.30 (s, 1H), 6.12 (s, 1H), 3.77 (s, 3H);  $^{13}\text{C}$  NMR (75 MHz,  $\text{CDCl}_3$ ):  $\delta$  159.0, 135.2, 135.1, 134.1, 122.6, 116.7, 116.5, 116.0, 111.9, 55.5; HRMS:  $\text{C}_{10}\text{H}_8\text{BrNO}$  calculated 236.9789, found 236.9786; New compound.

**3-(2-Bromo-5-methoxyphenyl)-1-methylpyrrolidine-3-carbonitrile (1E):** Prepared according to the preparation of 1z, 71% isolated yield; Yellow oil; IR (KBr): 3446, 2941, 2842, 2789, 2235, 1635, 1467, 1293, 811  $\text{cm}^{-1}$ ;  $^1\text{H}$  NMR (300 MHz,  $\text{CDCl}_3$ ):  $\delta$  7.53 (d,  $J$  = 9.0 Hz, 1H), 6.93 (d,  $J$  = 3.0 Hz, 1H), 6.73 (dd,  $J_1$  = 8.7 Hz,  $J_2$  = 3.0 Hz, 1H), 3.79 (s, 3H), 3.41 (d,  $J$  = 9.9 Hz, 1H), 3.17 (d,  $J$  = 9.9 Hz, 1H), 3.00–2.90 (m, 2H), 2.75–2.69 (m, 1H), 2.46 (s, 3H), 2.45–2.37 (m, 1H);  $^{13}\text{C}$  NMR (75 MHz,  $\text{CDCl}_3$ ):  $\delta$  158.8, 137.9, 135.5, 122.6, 115.0, 114.0, 113.5, 65.4, 55.5, 54.5, 45.9, 41.6, 38.1; HRMS:  $\text{C}_{13}\text{H}_{15}\text{BrN}_2\text{O}$  calculated 294.0368, found 294.0363; New compound.

**(±)-Horsfiline (2E):**<sup>21</sup> Yellow solid, mp: 159–160 °C; IR (KBr): 3449, 2922, 2851, 1702, 1492, 1208, 1032, 811, 669, 618  $\text{cm}^{-1}$ ;  $^1\text{H}$  NMR (600 MHz,  $\text{CDCl}_3$ ):  $\delta$  7.95 (br,

1H), 7.02 (d,  $J = 2.4$  Hz, 1H), 6.78 (d,  $J = 8.4$  Hz, 1H), 6.72 (dd,  $J_1 = 8.4$  Hz,  $J_2 = 2.4$  Hz, 1H), 3.79 (s, 3H), 3.03–2.99 (m, 1H), 2.85 (s, 2H), 2.74 (q,  $J = 7.2$  Hz, 1H), 2.45 (s, 3H), 2.43–2.39 (m, 1H), 2.11–2.06 (m, 1H);  $^{13}\text{C}$  NMR (150 MHz,  $\text{CDCl}_3$ ):  $\delta$  182.4, 156.2, 137.7, 133.2, 112.4, 110.4, 109.6, 66.5, 56.7, 55.9, 54.1, 41.8, 38.1; HRMS:  $\text{C}_{13}\text{H}_{16}\text{N}_2\text{O}_2$  calculated 232.1212, found 232.1211; Registry Number: [136316-07-9].

## Control Experiments and Proposed Pathway

The following two control experiments were preceded for the study of reaction pathway. First, the reaction was processed stepwise by converting all the **1a** to its corresponding amide derivative **3a** and then coupling the C-N bond to form **2a** by using the same reaction condition with the domino process.

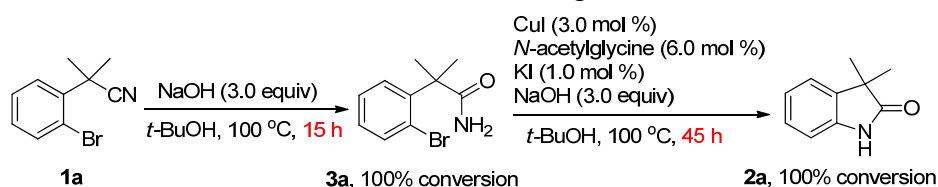

**Scheme 1.** Stepwise formation of oxindole

Second, the reaction was monitored and the ratios of each species were checked at the different reaction time (Table 1).

**Table 1.** Reaction monitoring for the ratio of all species.

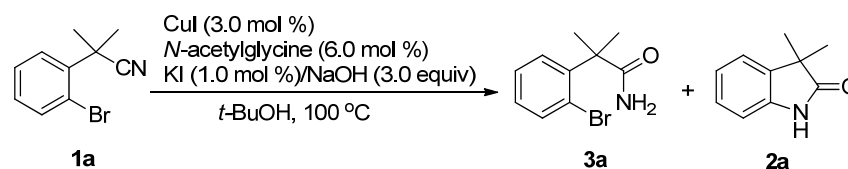

| Entry | t (h) | Ratio of <b>1a</b> <sup>a</sup> | Ratio of <b>3a</b> <sup>a</sup> | Ratio of <b>2a</b> <sup>a</sup> |
|-------|-------|---------------------------------|---------------------------------|---------------------------------|
| 1     | 4     | 38                              | 56                              | 6                               |
| 2     | 6     | 22                              | 55                              | 23                              |
| 3     | 8     | 3                               | 53                              | 44                              |
| 4     | 10    | 0                               | 31                              | 69                              |
| 5     | 12    | 0                               | 19                              | 81                              |
| 6     | 16    | 0                               | 12                              | 88                              |
| 7     | 20    | 0                               | 7                               | 93                              |
| 8     | 24    | 0                               | 0                               | 100                             |

<sup>a</sup> The ratios were determined by  $^1\text{H}$  NMR after working up the reaction.

We can conclude and describe the results according to the control experiments:

1. For the stepwise reaction (Scheme 1), the transformation from **3a** to **2a** required much longer time than the overall reaction time of Cu-catalyzed domino reaction. Thus, the reaction pathway of the Cu-catalyzed domino reaction might be not via the directly intramolecular C-N coupling reaction of **3a** to form **2a**.

2. According to the results listed in table 1, we observed that the consumption of **1a** is significantly faster than the stepwise reaction. This is caused by the acceleration of nucleophilic addition by copper complex, which is acting as a Lewis acid.

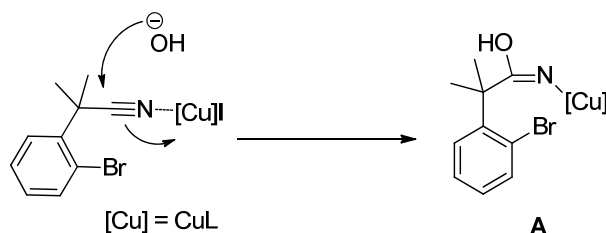

3. The formation of **2a** in the domino reaction is much more facile than the stepwise reaction; more than 80% **2a** was generated within 12 h (Table 1, entry 5). That means the oxidative addition of copper complex to aryl bromide moiety in domino reaction is much easier than the transformation of **2a** from **3a**. This suggests that the oxidative addition occurs in intramolecular manner. The following reductive elimination provides **2'**, and a rapid tautomerization affords product **2**.

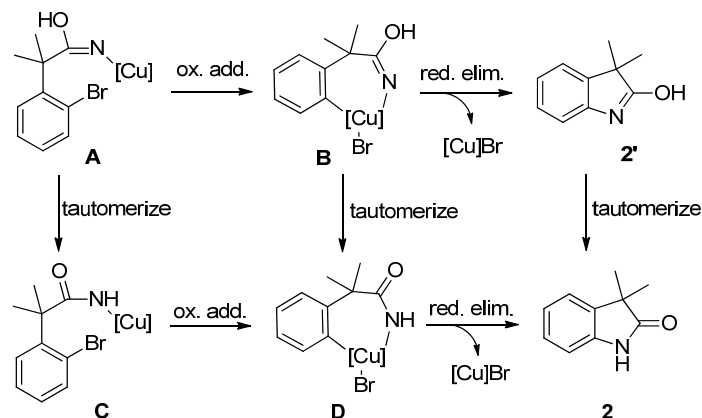

Furthermore, we believe that the tautomerization should be much faster than the intramolecular oxidative addition. Thus, the reaction pathway should be decided as **A**→**C**→**D**→**2**.

4. The observation of **3** in table 1 was caused by the direct hydrolysis of **A** or **C**. And the amount of **3** was related to the amount of **A** and **C**.

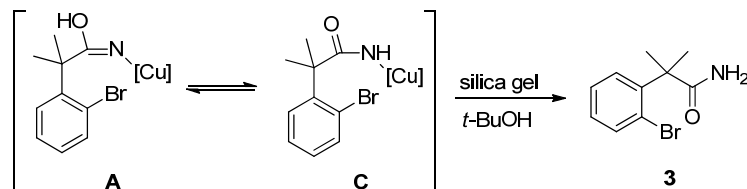

5. Before the complete consumption of **1a**, the ratio of **3a** is always about 55% (Table 1, entries 1–3). After the consumption of **1a** is complete, the ratio of **3a** is also reduced significantly. This result reveals that the equilibrium between **C** and **D** can be maintained before the complete consumption of **1a**, and the reductive elimination of **D** dominate the formation of **2**. Our proposed mechanism (shown in manuscript) was suggested according to the results described above.

## References

- (1) Yamashita, M.; Ono, Y.; Tawada, H. *Tetrahedron* **2004**, *60*, 2843.
- (2) (a) Hideaki, M.; Mitsutaka, N. *Tetrahedron* **2006**, *62*, 7056. (b) Ivarez-Bercedo, P.; Flores-Gaspar, A.; Correa, A.; Martin, R. *J. Am. Chem. Soc.* **2010**, *132*, 466.
- (3) Chaumontet, M.; Piccardi, R.; Audic, N.; Hitce, J.; Peglion, L.-J.; Clot, E. *J. Am. Chem. Soc.* **2008**, *130*, 15157.
- (4) Pascal, C.; Dubois, J.; Guénard, D.; Guéritte, F. *J. Org. Chem.* **1998**, *63*, 6414.
- (5) Kumar, S.; Peruncheralathan, S.; Ila, H.; Junjappa, H. *Org. Lett.* **2008**, *10*, 965.
- (6) Heemstra, J. M.; Kerrigan, S. A.; Doerge, D. R.; Helferich, W. G.; Boulanger, W. A. *Org. Lett.* **2006**, *8*, 5441.
- (7) Pieters, G.; Gaucher, A.; Prim, D.; Besson, T.; Planas, J. G.; Teixidor, F.; Vinas, C.; Light, M. E.; Hursthouse, M. B. *Chem. Commun.* **2011**, *47*, 7725.
- (8) Balieu, S.; Toutah, K.; Carro, L.; Chamoreau, L.-M.; Rousselière, H.; Courillon, C. *Tetrahedron Lett.* **2011**, *52*, 2876.
- (9) Flores-Gaspar, A.; Martin, R. *Adv. Synth. Catal.* **2011**, *353*, 1223.
- (10) Kesharwani, T.; Verma, A. K.; Emrich, D.; Ward, J. A.; Larock, R. C. *Org. Lett.* **2009**, *11*, 2591.
- (11) Hitce, J.; Retailleau, P.; Baudoin, O. *Chem. Eur. J.* **2007**, *13*, 792.
- (12) Erdelmeier, I.; Tailhan-Lomont, C.; Yadan, J.-C. *J. Org. Chem.* **2000**, *65*, 8152.
- (13) Wasa, M.; Yu, J.-Q. *J. Am. Chem. Soc.* **2008**, *130*, 14058.
- (14) Fukui, M.; Endo, Y.; Oishi, T. *Chem. Pharm. Bull.* **1980**, *28*, 3639.
- (15) Fensome, A.; Adams, W. R.; Adams, A. L.; Berrodin, T. J.; Cohen, J.; Huselton, C.; Illenberger, A.; Kern, J. C.; Hudak, V. A.; Marella, M. A.; Melenski, E. G.; McComas, C. C.; Mugford, C. A.; Slayden, O. D.; Yudt, M.; Zhang, Z.; Zhang, P.; Zhu, Y.; Winneker, R. C.; Wrobel, J. E. *J. Med. Chem.* **2008**, *51*, 1861.
- (16) Harrowven, D. C.; Stenning, K. J.; Whiting, S.; Thompson, T.; Walton, R. *Org. Biomol. Chem.* **2011**, *9*, 4882.
- (17) Villemin, D.; Martin, B. *Synth. Commun.* **1998**, *28*, 3201.
- (18) Dandia, A.; Bhati, D. S.; Jain, A. K.; Sharma, G. N. *Ultrason. Sonochem.* **2011**, *18*, 1143.
- (19) Motoyama, Y.; Kamo, K.; Nagashima, H. *Org. Lett.*, **2009**, *11*, 1345.
- (20) Jossang, A.; Jossang, P.; Hadi, H. A.; Sevenet, T.; Bodo, B. *J. Org. Chem.* **1991**, *56*, 6527.
- (21) Anderton, N.; Cockrum, P. A.; Colegate, S. M.; Edgar, J. A.; Flower, K.; Gardner, D.; Willing, R. I. *Phytochemistry* **1998**, *48*, 437.

# <sup>1</sup>H and <sup>13</sup>C NMR Spectra (300 MHz and 600 MHz, CDCl<sub>3</sub>) for substrates 2-(2-Bromophenyl)-2-methylpropanenitril (1a)

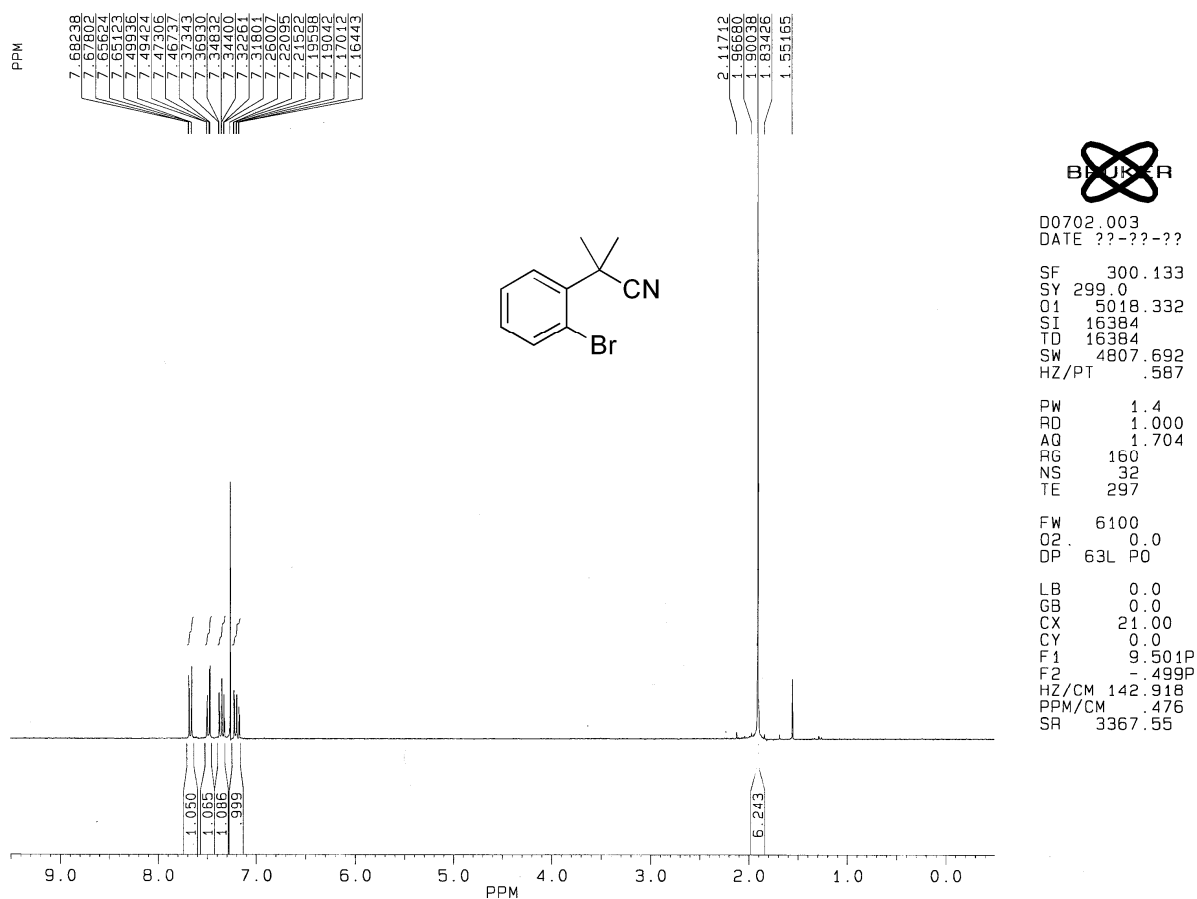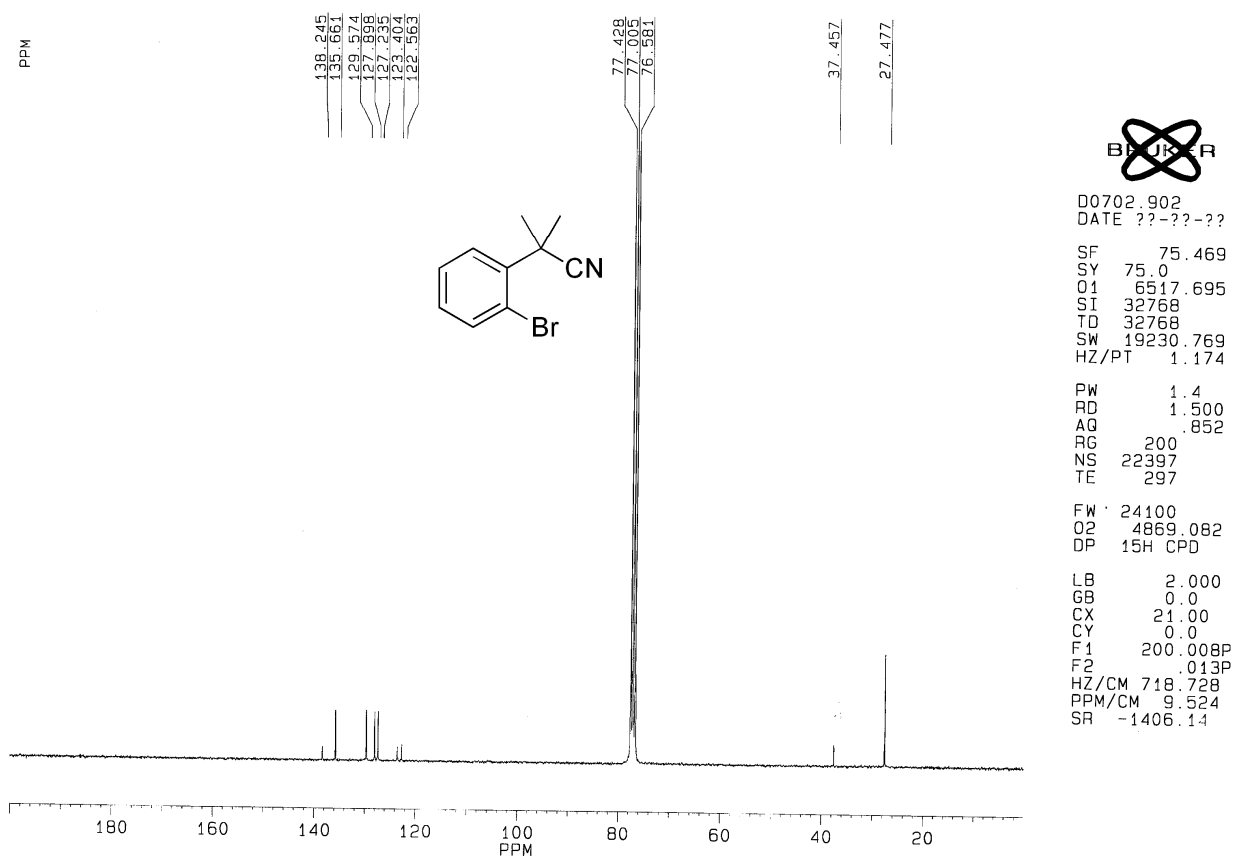

2-(2-Iodophenyl)-2-methylpropanenitril (1a')

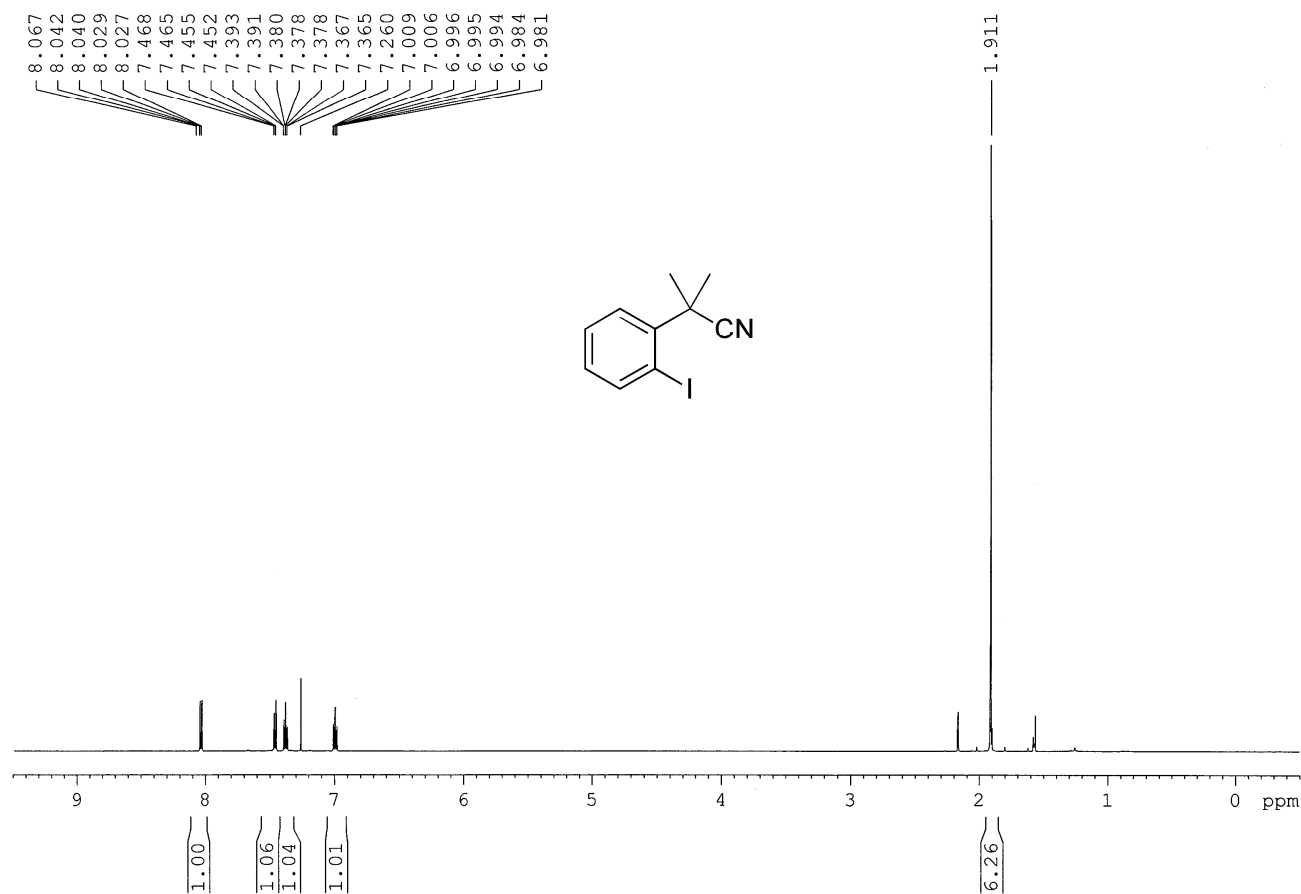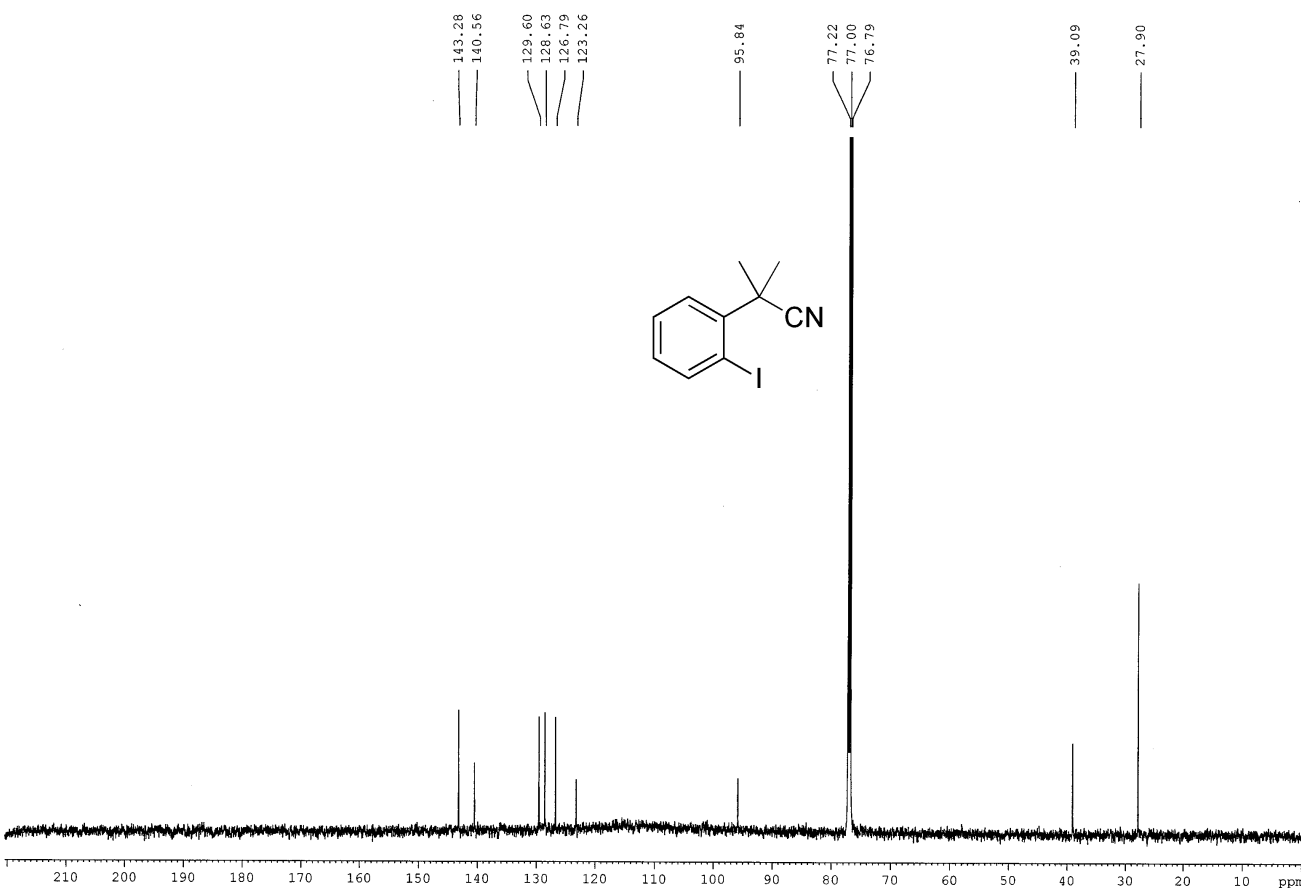

**2-(2-Bromo-5-(trifluoromethyl)phenyl)-2-methylpropanenitrile (1b)**

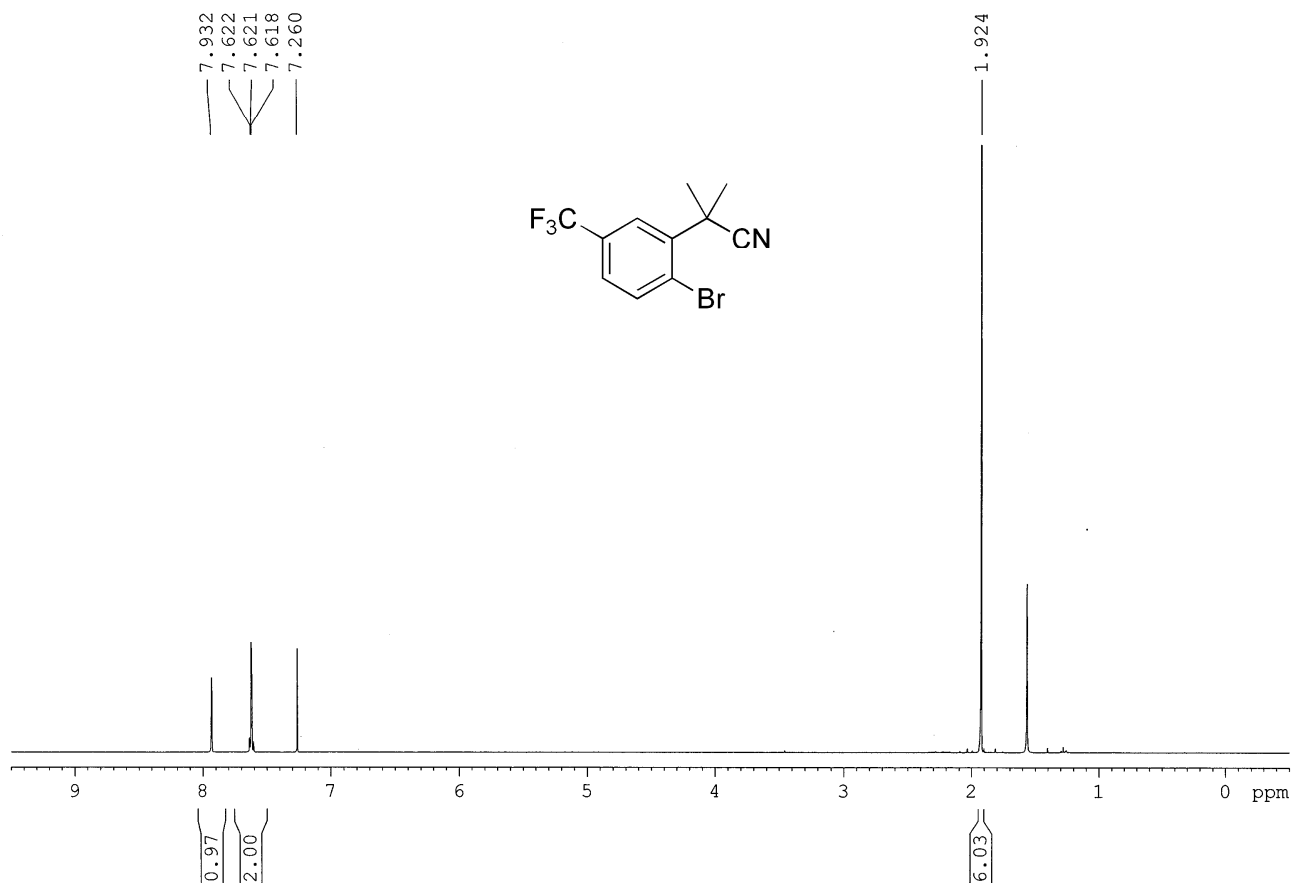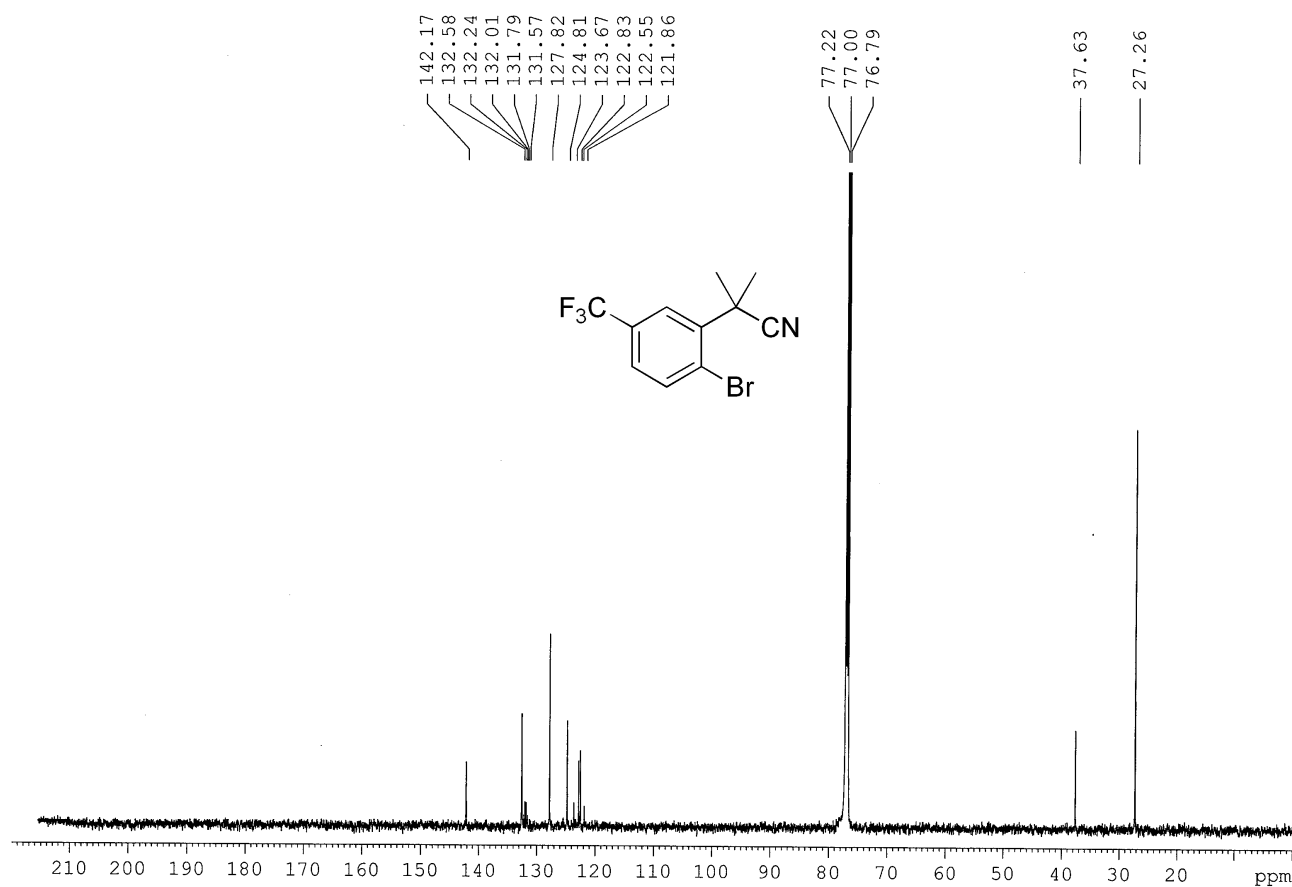



# 1-Bromo-2-(bromomethyl)-4-chlorobenzene (4c)

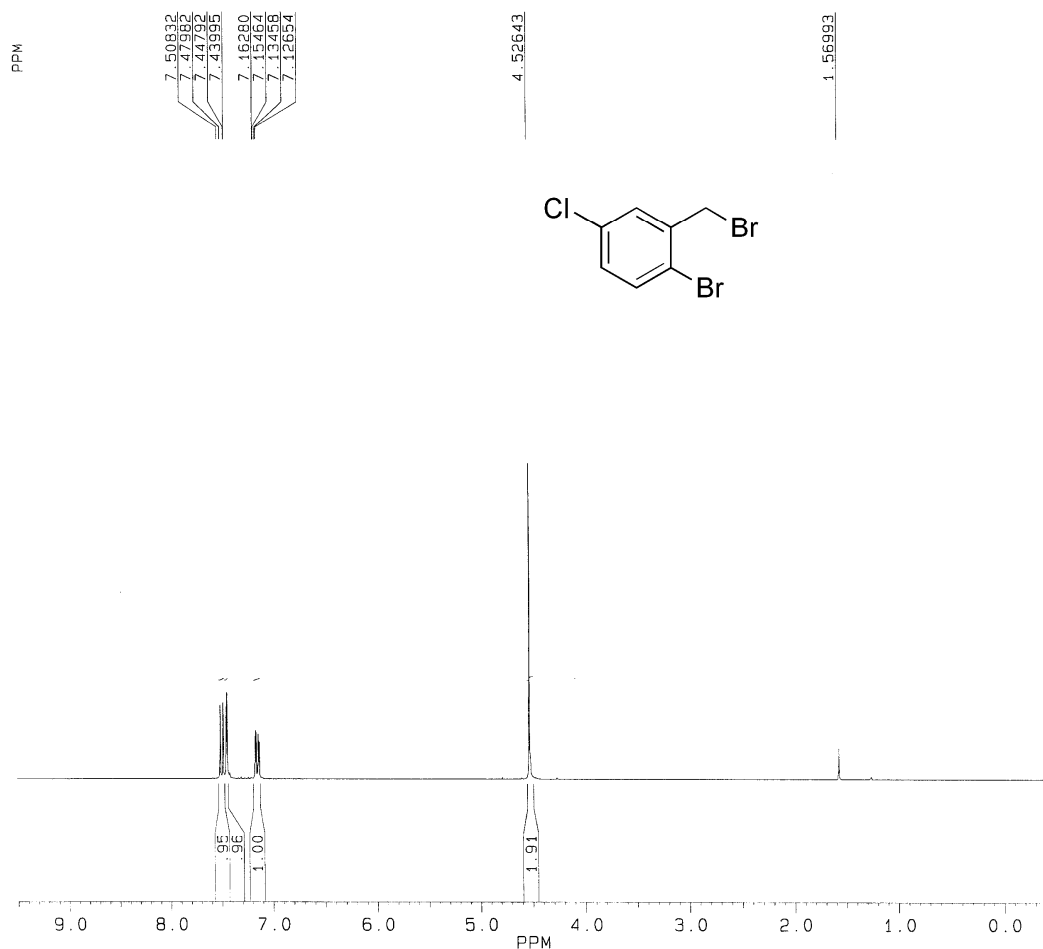

**BEUKER**

D0316.009  
DATE ??-??-??

SF 300.133  
SY 299.0  
Q1 5018.332  
SI 16384  
TD 16384  
SW 4807.692  
HZ/PT .587

PW 1.4  
RD 1.000  
AQ 1.704  
RG 40  
NS 16  
TE 297

FW 6100  
O2 0.0  
DP 63L P0  
LB 0.0  
GB 0.0  
CX 21.00  
CY 0.0  
F1 9.501P  
F2 -.499P  
HZ/CM 142.918  
PPM/CM .476  
SR 3367.55

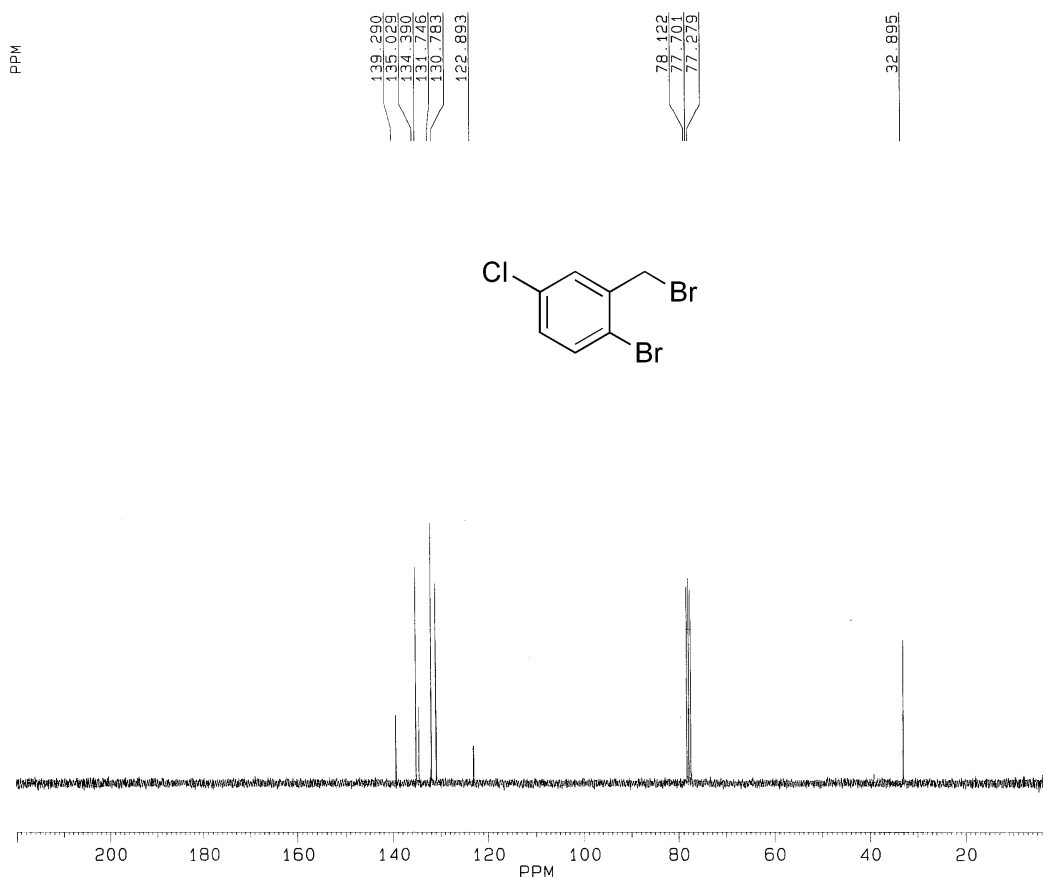

**BEUKER**

D0316.902  
DATE ??-??-??

SF 75.469  
SY 75.0  
Q1 6517.695  
SI 32768  
TD 32768  
SW 19230.769  
HZ/PT 1.174

PW 1.4  
RD 1.500  
AQ .852  
RG 200  
NS 325  
TE 297

FW 24100  
O2 4869.082  
DP 15H CPD  
LB 0.0  
GB 0.0  
CX 21.00  
CY 0.0  
F1 220.009P  
F2 .013P  
HZ/CM 790.606  
PPM/CM 10.476  
SR -1454.27

**2-(2-Bromo-5-chlorophenyl)acetonitrile (5c)**

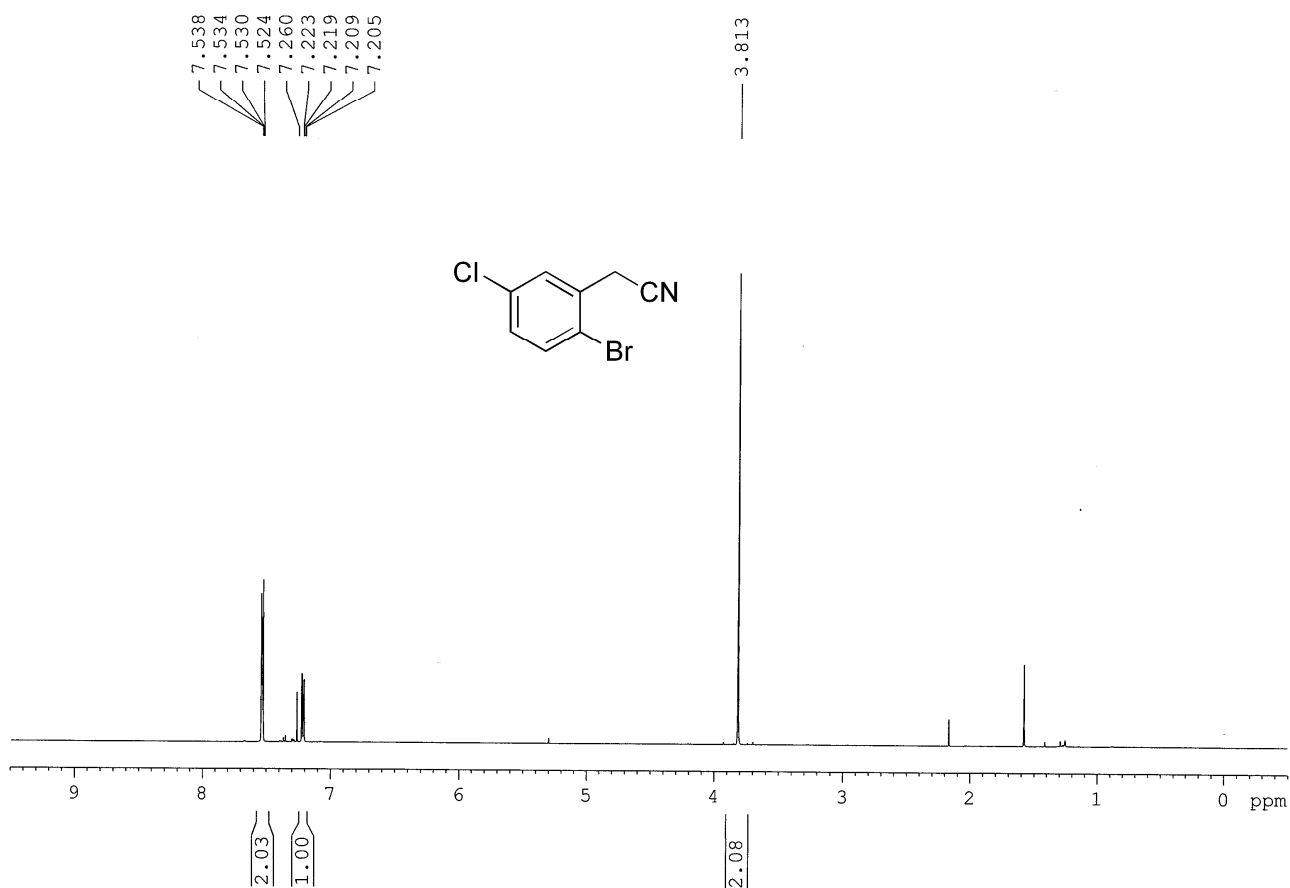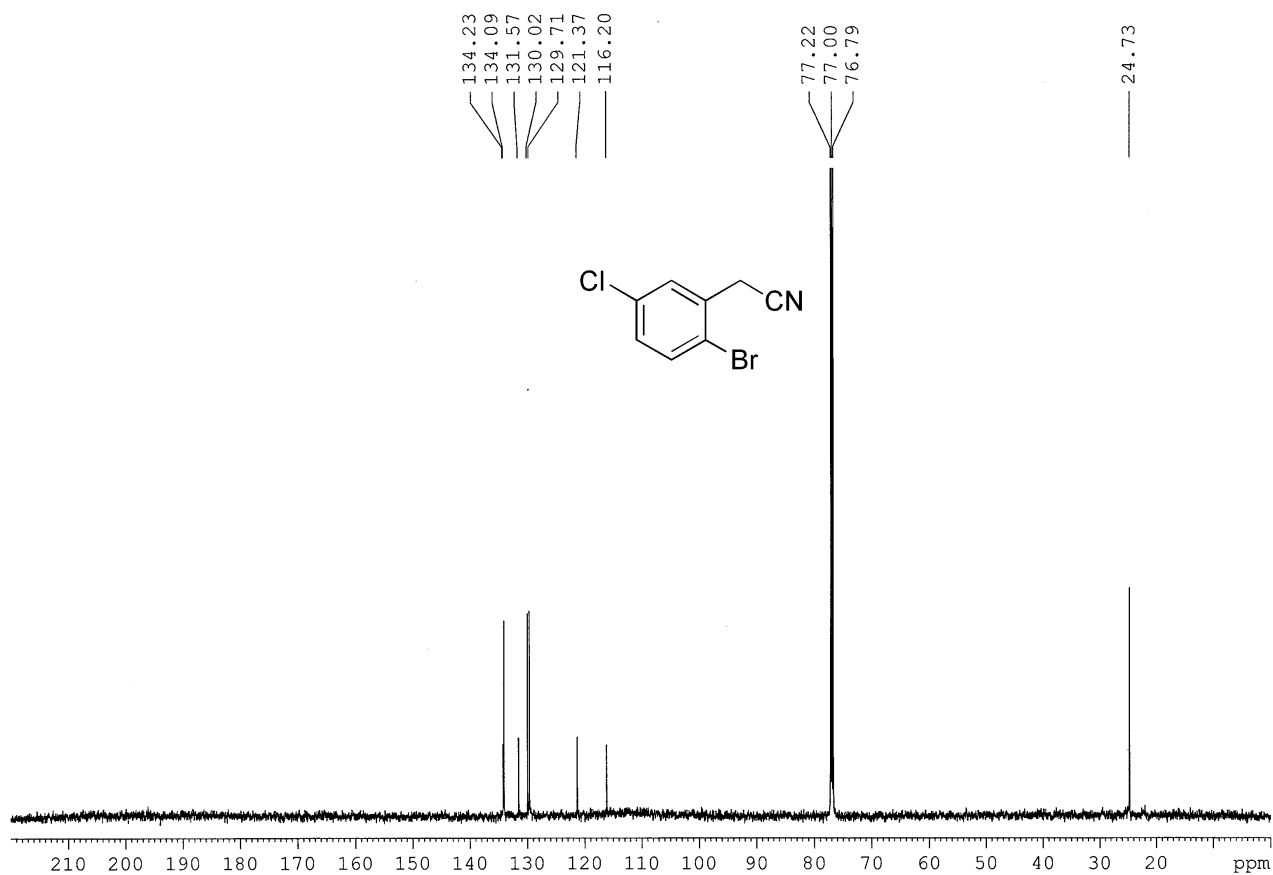

**2-(2-Bromo-5-chlorophenyl)-2-methylpropanenitrile (1c)**

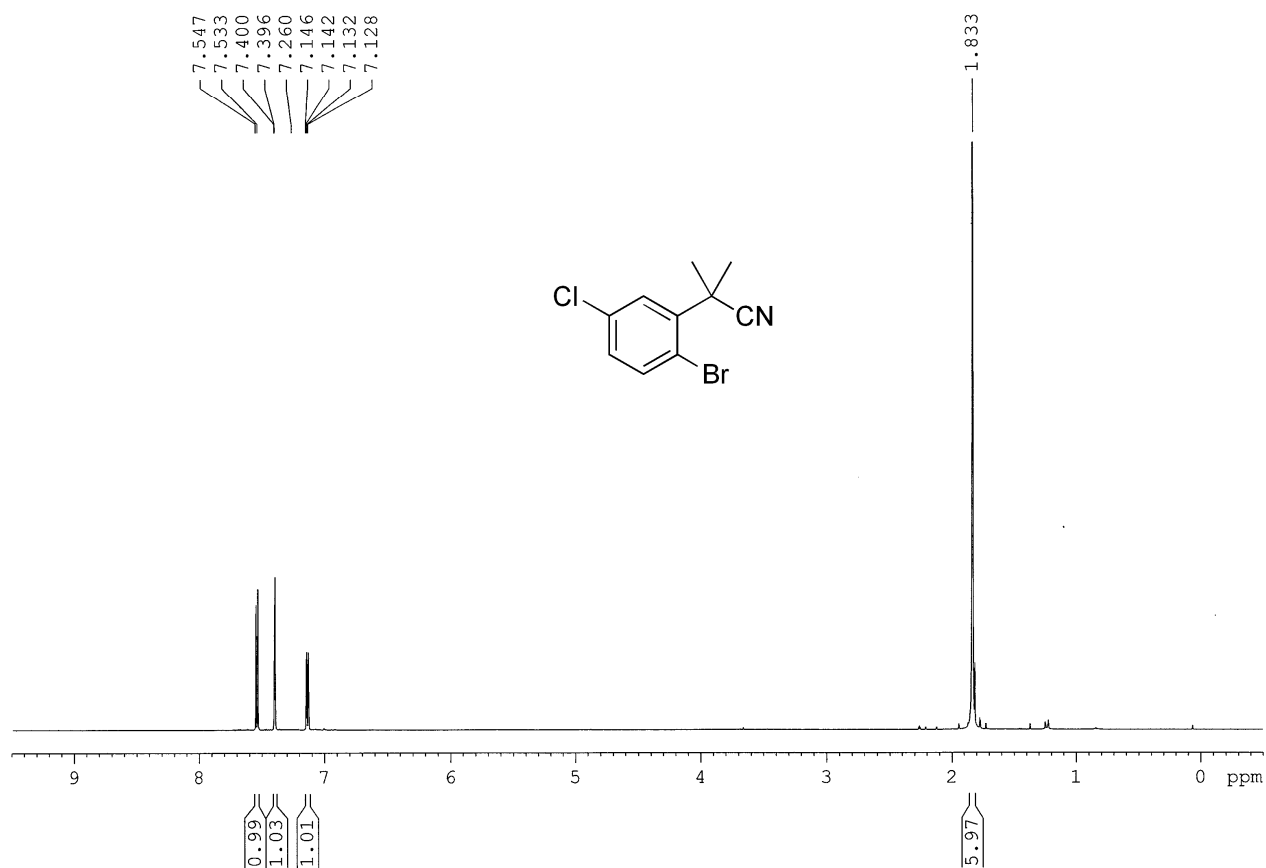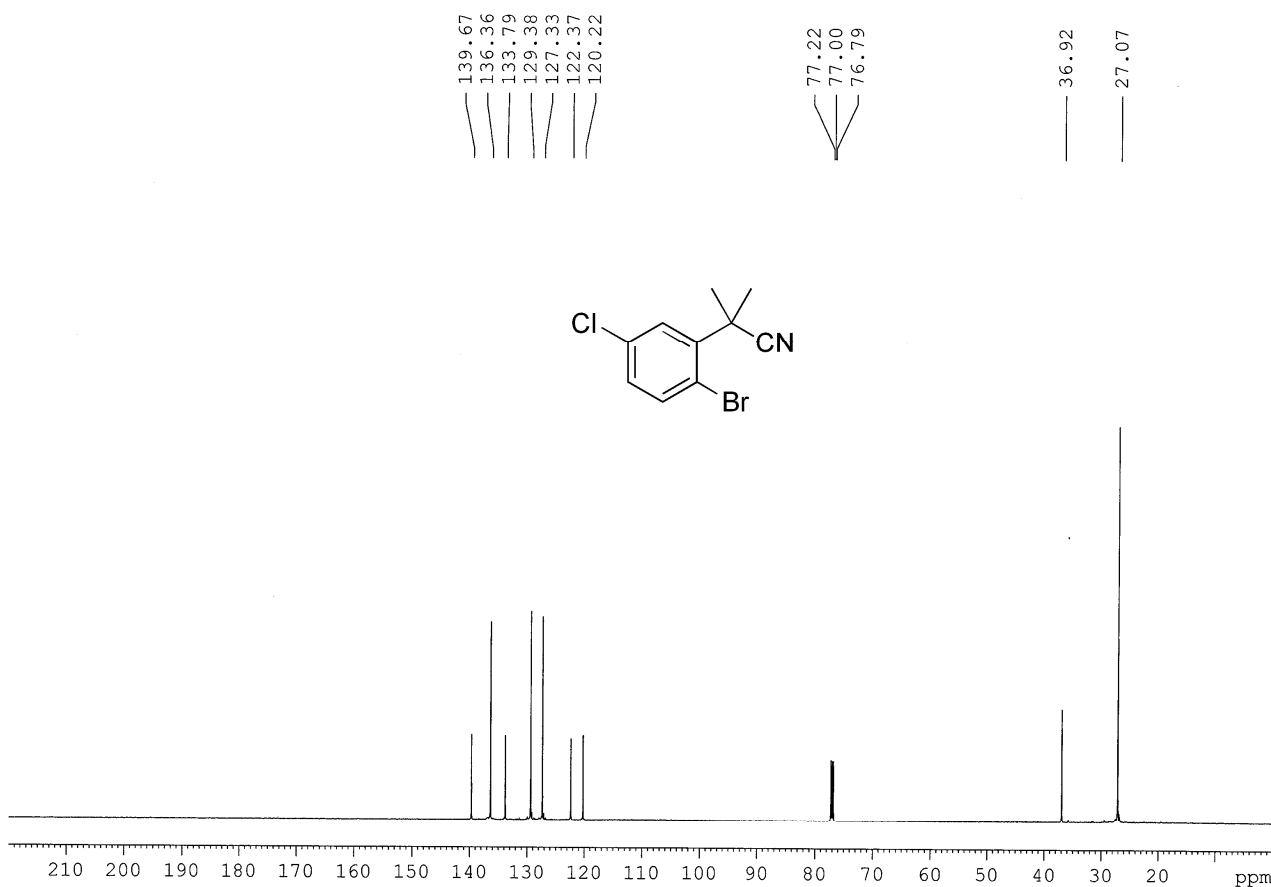

# 2-(2-Bromo-5-methoxyphenyl)acetonitrile (5d)

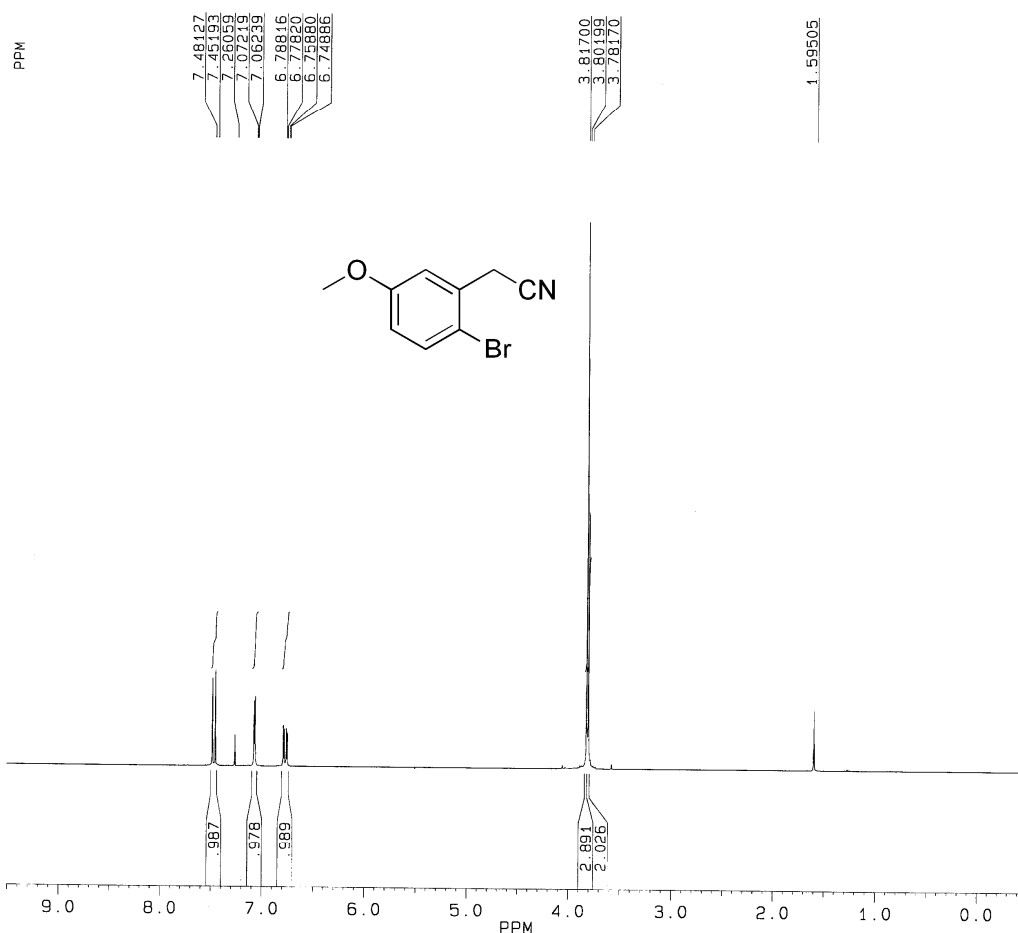

~~BRUKER~~

D0729.012  
DATE ??-??-??

SF 300.133  
SY 299.0  
O1 5018.332  
SI 16384  
TD 16384  
SW 4807.692  
HZ/PT .587

PW 1.4  
RD 1.000  
AQ 1.704  
RG 40  
NS 32  
TE 297

FW 6100  
O2 0.0  
DP 63L P0  
LB 0.0  
GB 0.0  
CX 21.00  
CY 0.0  
F1 9.501P  
F2 -.499P  
HZ/CM 142.918  
PPM/CM .476  
SR 3366.97

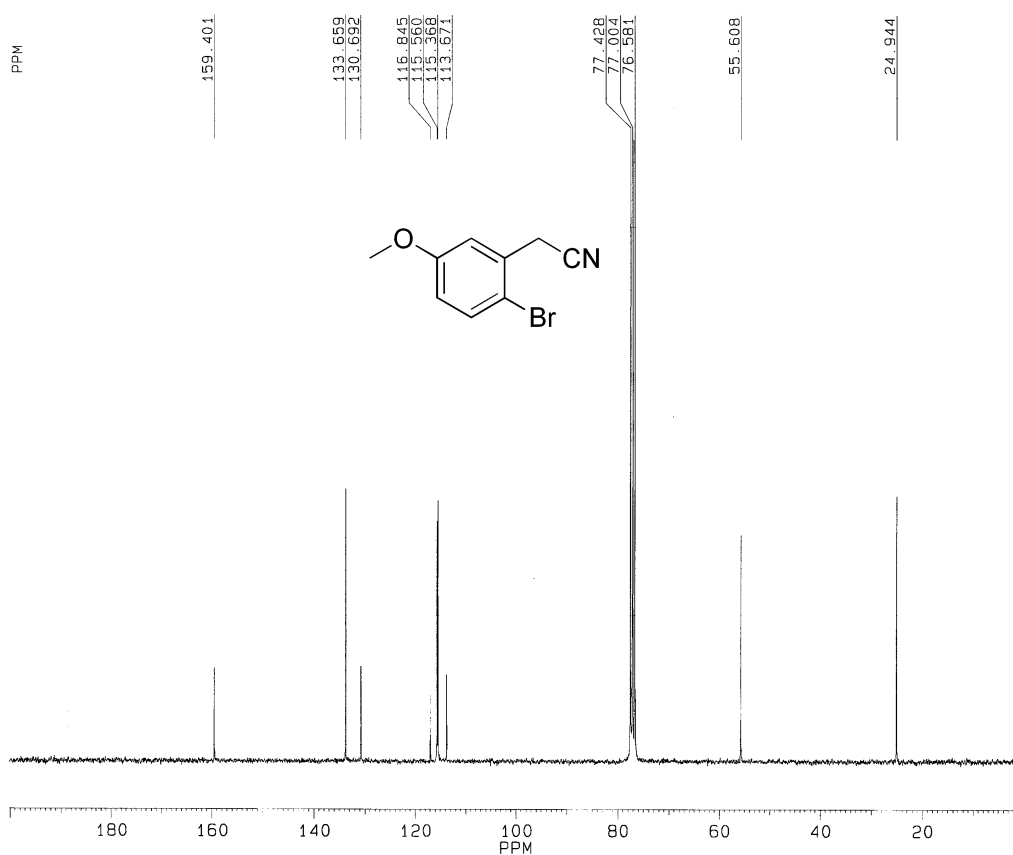

~~BRUKER~~

D0905.901  
DATE ??-??-??

SF 75.469  
SY 75.0  
O1 6517.695  
SI 32768  
TD 32768  
SW 19230.769  
HZ/PT 1.174

PW 1.4  
RD 1.500  
AQ .852  
RG 200  
NS 5105  
TE 297

FW 24100  
O2 4869.082  
DP 15H CPD  
LB 2.000  
GB 0.0  
CX 21.00  
CY 0.0  
F1 200.008P  
F2 .013P  
HZ/CM 718.728  
PPM/CM 9.524  
SR -1403.80

# 2-(2-Bromo-5-methoxyphenyl)-2-methylpropanenitrile (1d)

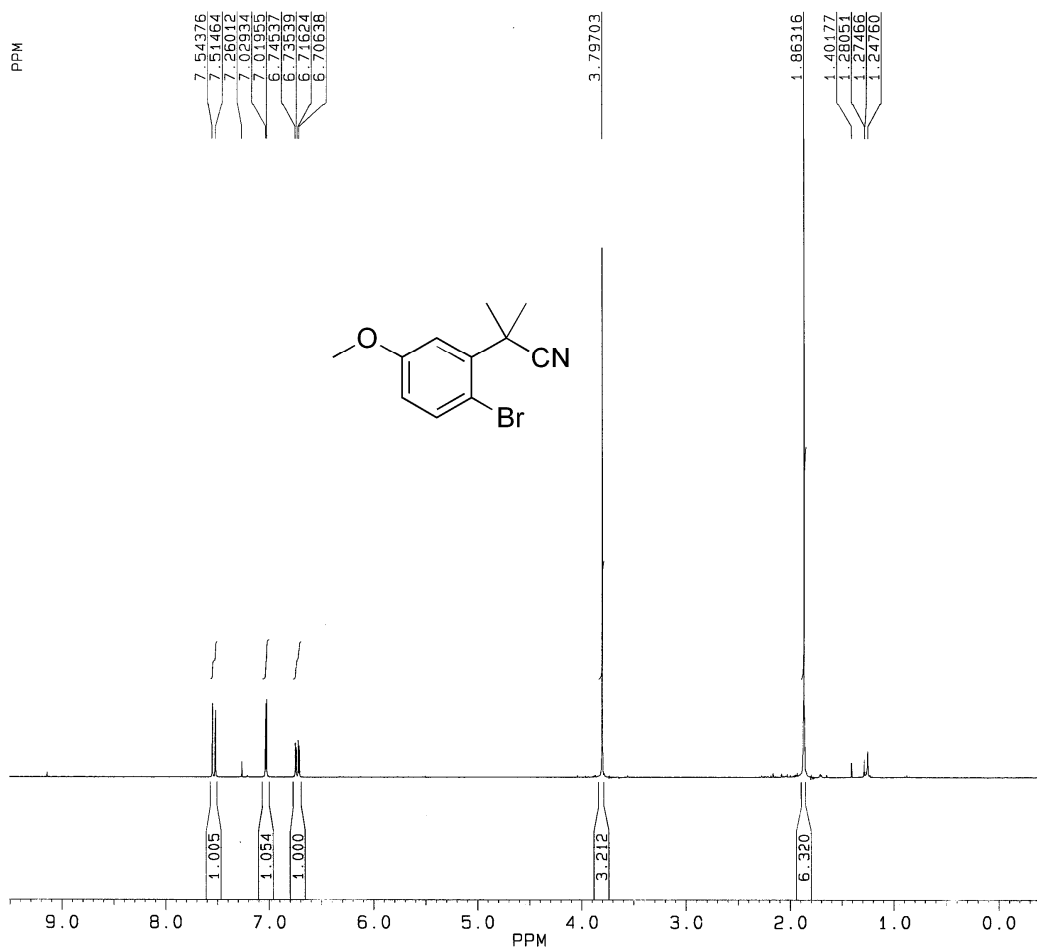

**BRUKER**

D1213.013  
DATE ??-??-??

SF 300.133  
SY 299.0  
O1 5018.332  
SI 16384  
TD 16384  
SW 4807.692  
HZ/PT .587

PW 1.4  
RD 1.000  
AQ 1.704  
RG 20  
NS 0  
TE 297

FW 6100  
O2 0.0  
DP 63L P0

LB 0.0  
GB 0.0  
CX 21.00  
CY 0.0  
F1 9.501P  
F2 - .499P  
HZ/CM 142.918  
PPM/CM .476  
SR 3367.55

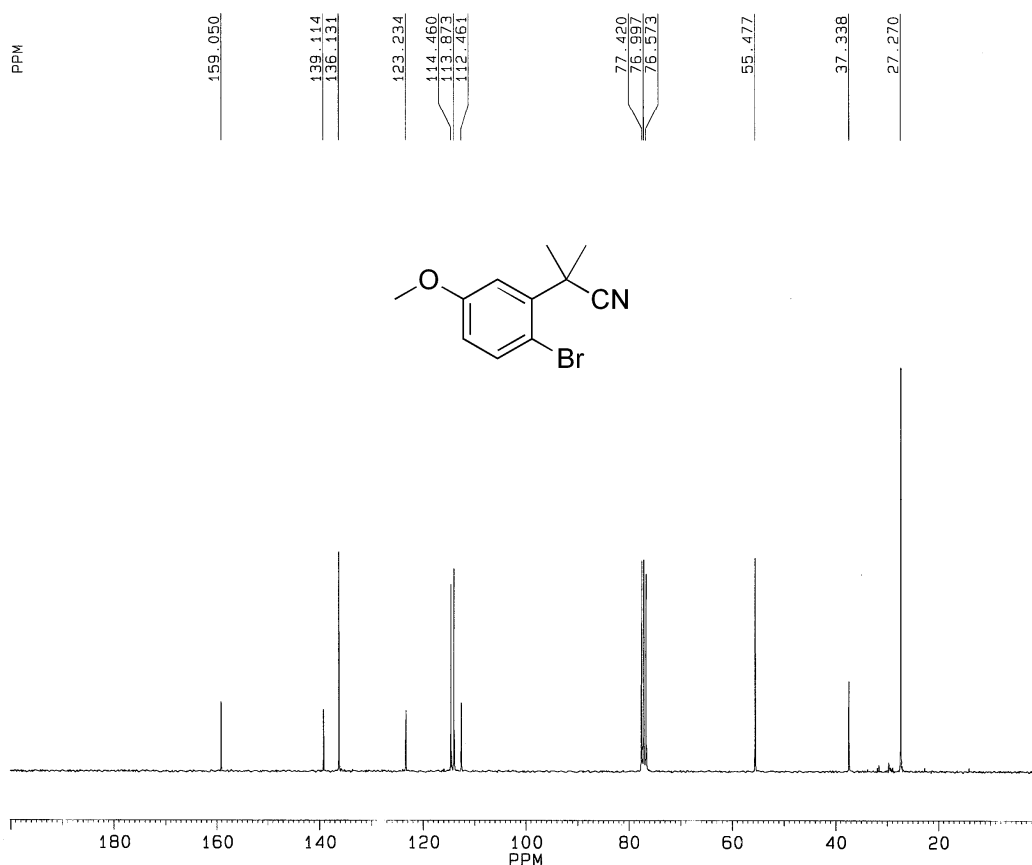

**BRUKER**

D1213.901  
DATE ??-??-??

SF 75.469  
SY 75.0  
O1 6517.695  
SI 32768  
TD 32768  
SW 19230.769  
HZ/PT 1.174

PW 1.4  
RD 1.500  
AQ .852  
RG 160  
NS 4058  
TE 297

FW 24100  
O2 4869.082  
DP 15H CPD

LB 2.000  
GB 0.0  
CX 21.00  
CY 0.0  
F1 200.008P  
F2 .013P  
HZ/CM 718.728  
PPM/CM 9.524  
SR -1399.10

# 2-(6-Bromobenzo[d][1,3]dioxol-5-yl)acetonitrile (5e)

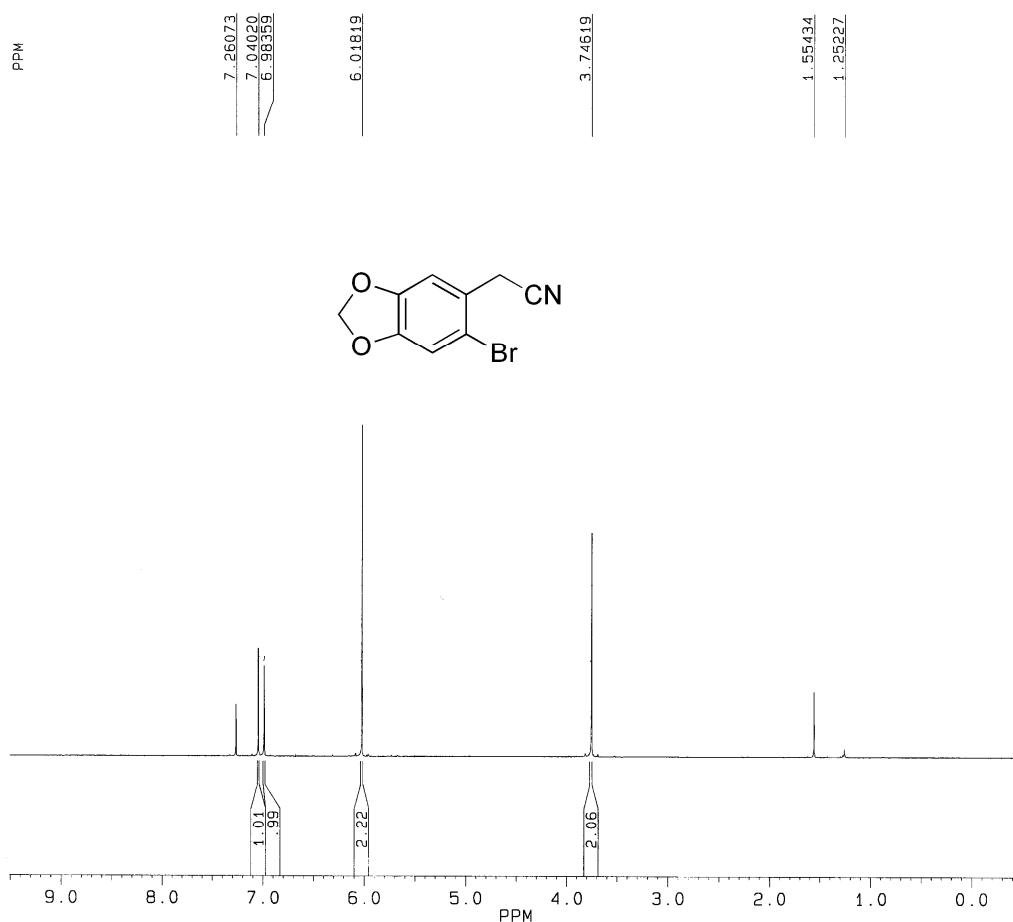

**BRUKER**

D0810.039  
DATE ??-??-??

SF 300.133  
SY 299.0  
Q1 5018.332  
SI 16384  
TD 16384  
SW 4807.692  
HZ/PT .587

PW 1.4  
RD 1.000  
AQ 1.704  
RG 400  
NS 32  
TE 297

FW 6100  
O2 0.0  
DP 63L P0

LB 0.0  
GB 0.0  
CX 21.00  
CY 0.0  
F1 9.501P  
F2 -.499P  
HZ/CM 142.918  
PPM/CM .476  
SR 3367.55

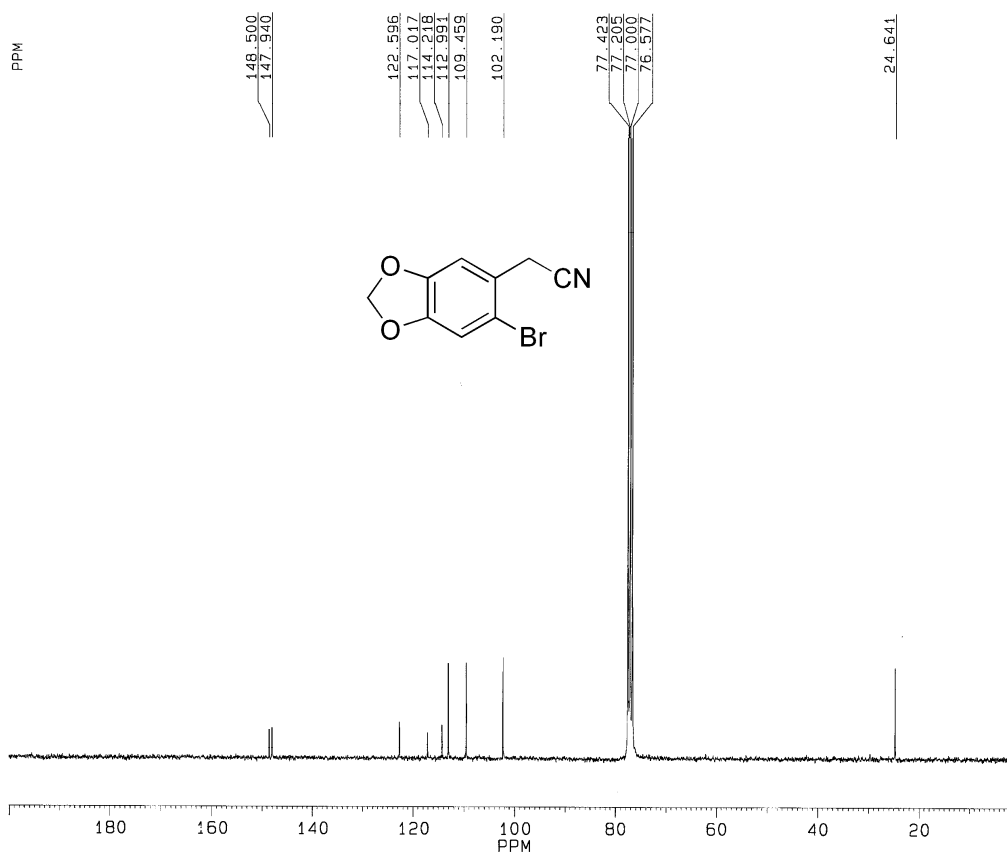

**BRUKER**

D0810.902  
DATE ??-??-??

SF 75.469  
SY 75.0  
Q1 6517.695  
SI 32768  
TD 32768  
SW 19230.769  
HZ/PT 1.174

PW 1.4  
RD 1.500  
AQ .852  
RG 200  
NS 15928  
TE 297

FW 24100  
O2 4869.082  
DP 15H CPD

LB 2.000  
GB 0.0  
CX 21.00  
CY 0.0  
F1 200.008P  
F2 .013P  
HZ/CM 718.728  
PPM/CM 9.524  
SR -1404.97

# 2-(6-Bromobenzo[d][1,3]dioxol-5-yl)-2-methylpropanenitrile (1e)

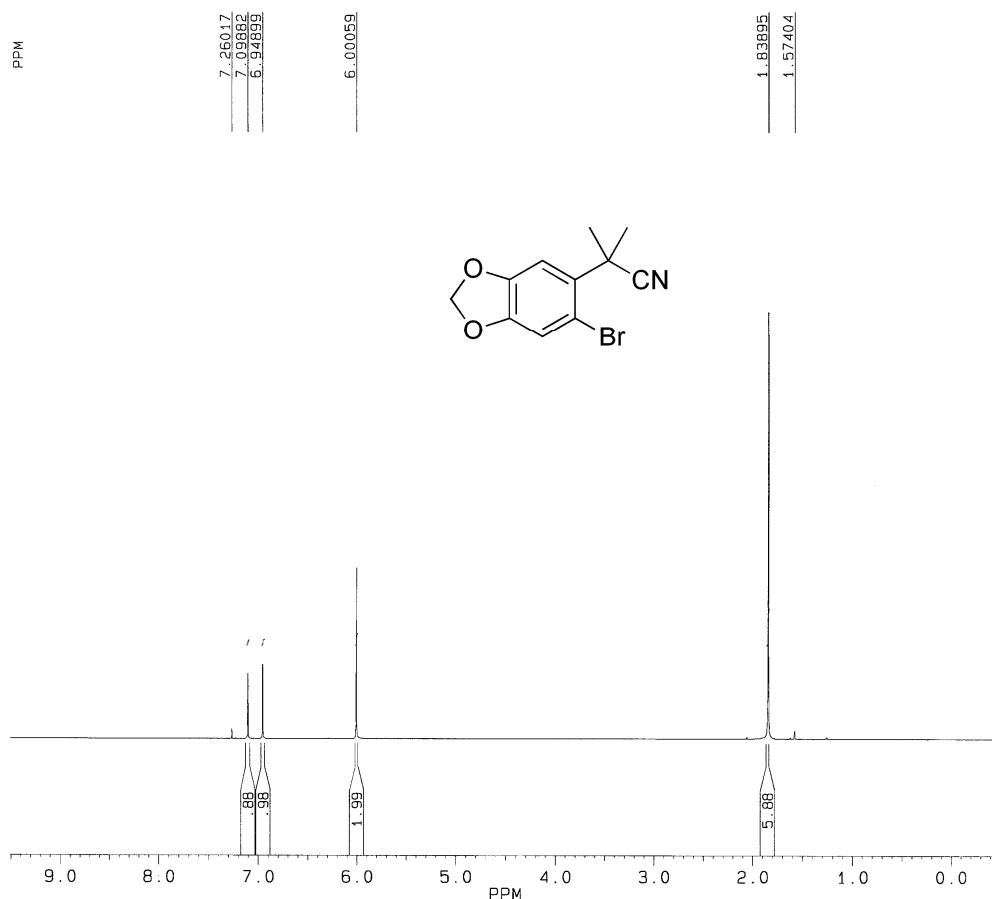

~~BRUKER~~

D0815.004  
DATE ??-??-??

SF 300.133  
SY 299.0  
Q1 5018.332  
SI 16384  
TD 16384  
SW 4807.692  
HZ/PT .587

PW 1.4  
RD 1.000  
AQ 1.704  
RG 20  
NS 32  
TE 297

FW 6100  
Q2 0.0  
DP 63L P0

LB 0.0  
GB 0.0  
CX 21.00  
CY 0.0  
F1 9.501P  
F2 1.499P  
HZ/CM 142.918  
PPM/CM .476  
SR 3367.55

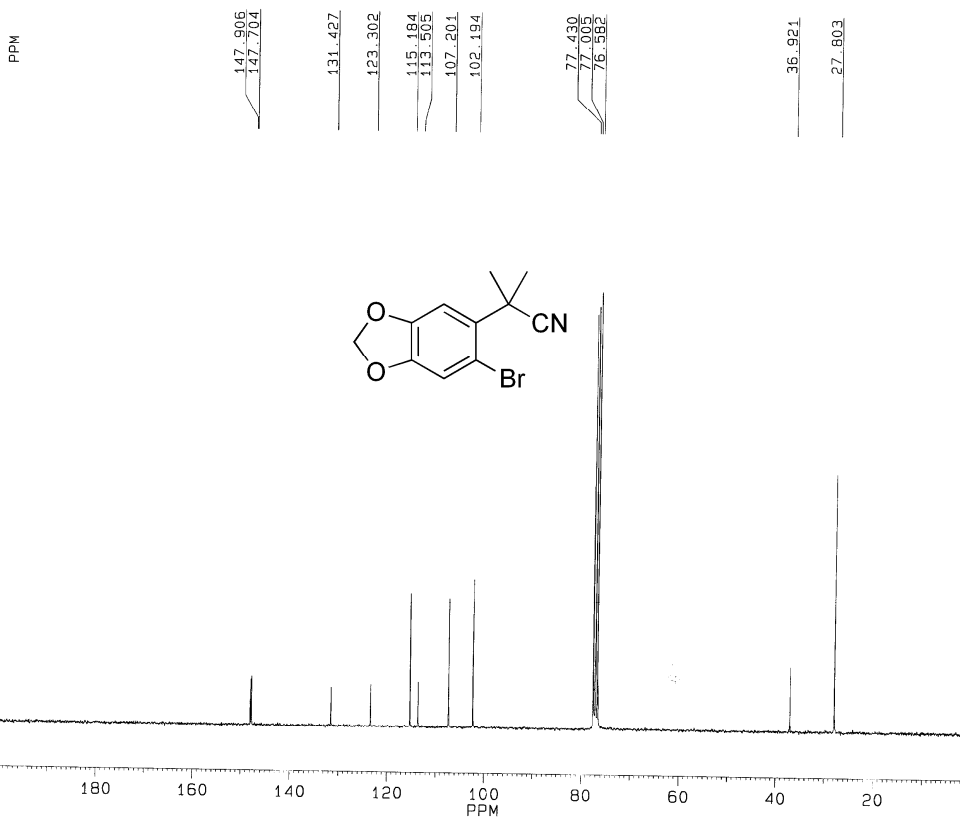

~~BRUKER~~

D0815.901  
DATE ??-??-??

SF 75.469  
SY 75.0  
Q1 6517.695  
SI 32768  
TD 32768  
SW 19230.769  
HZ/PT 1.174

PW 1.4  
RD 1.500  
AQ .852  
RG 160  
NS 3356  
TE 297

FW 24100  
Q2 4869.082  
DP 15H CPD

LB 2.000  
GB 0.0  
CX 21.00  
CY 0.0  
F1 200.008P  
F2 .013P  
HZ/CM 718.728  
PPM/CM 9.524  
SR -1403.80

# 2-(2-Bromo-4-(trifluoromethyl)phenyl)-2-methylpropanenitrile (1f)

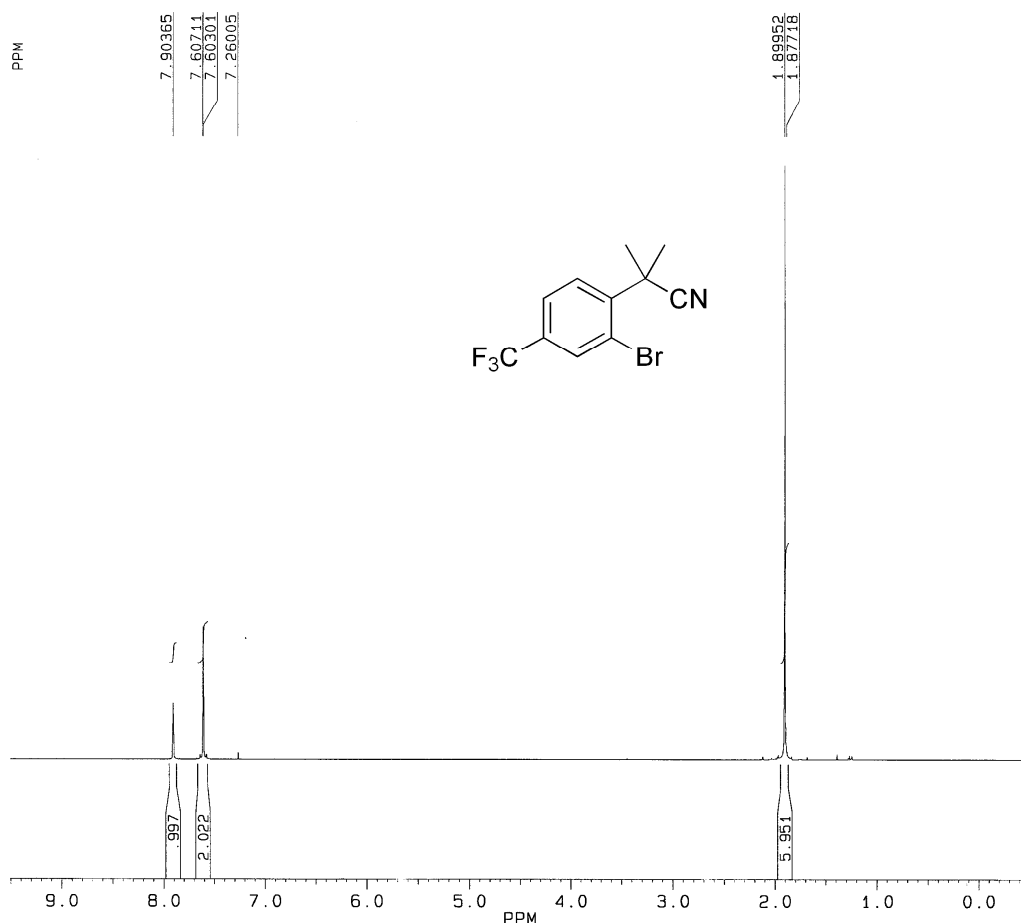

**BFUK-R**

D1222.009  
DATE ??-??-??

SF 300.133  
SY 299.0  
O1 5018.332  
SI 16384  
TD 16384  
SW 4807.692  
HZ/PT .587

PW 1.4  
RD 1.000  
AQ 1.704  
RG 10  
NS 32  
TE 297

FW 6100  
O2 .0.0  
DP 63L P0

LB 0.0  
GB 0.0  
CX 21.00  
CY 0.0  
F1 9.501P  
F2 -.499P  
HZ/CM 142.918  
PPM/CM .476  
SR 3367.55

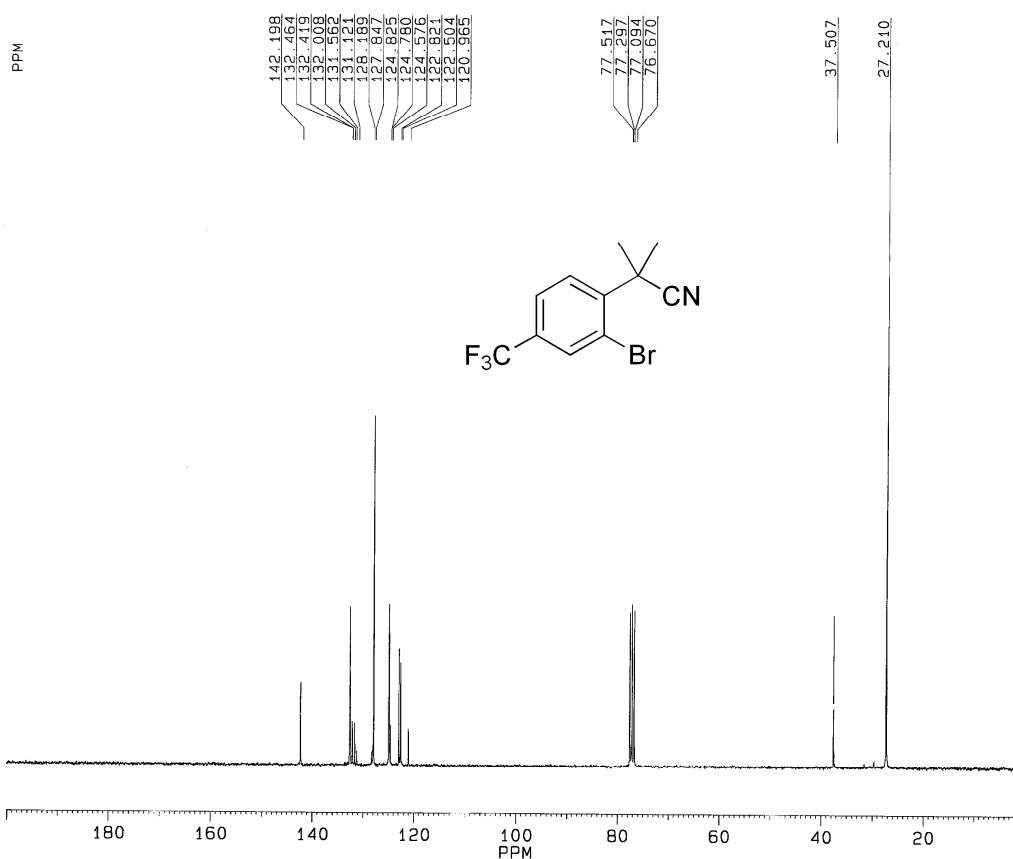

**BFUK-R**

D1221.907  
DATE ??-??-??

SF 75.469  
SY 75.0  
O1 6517.695  
SI 32768  
TD 32768  
SW 19230.769  
HZ/PT 1.174

PW 1.4  
RD 1.500  
AQ .852  
RG 160  
NS 800  
TE 297

FW 24100  
O2 4869.082  
DP 15H CPD

LB 2.000  
GB 0.0  
CX 21.00  
CY 0.0  
F1 200.008P  
F2 .013P  
HZ/CM 718.728  
PPM/CM 9.524  
SR -1404.97



**2-(2-Bromo-4-methoxyphenyl)acetonitrile (5g)**

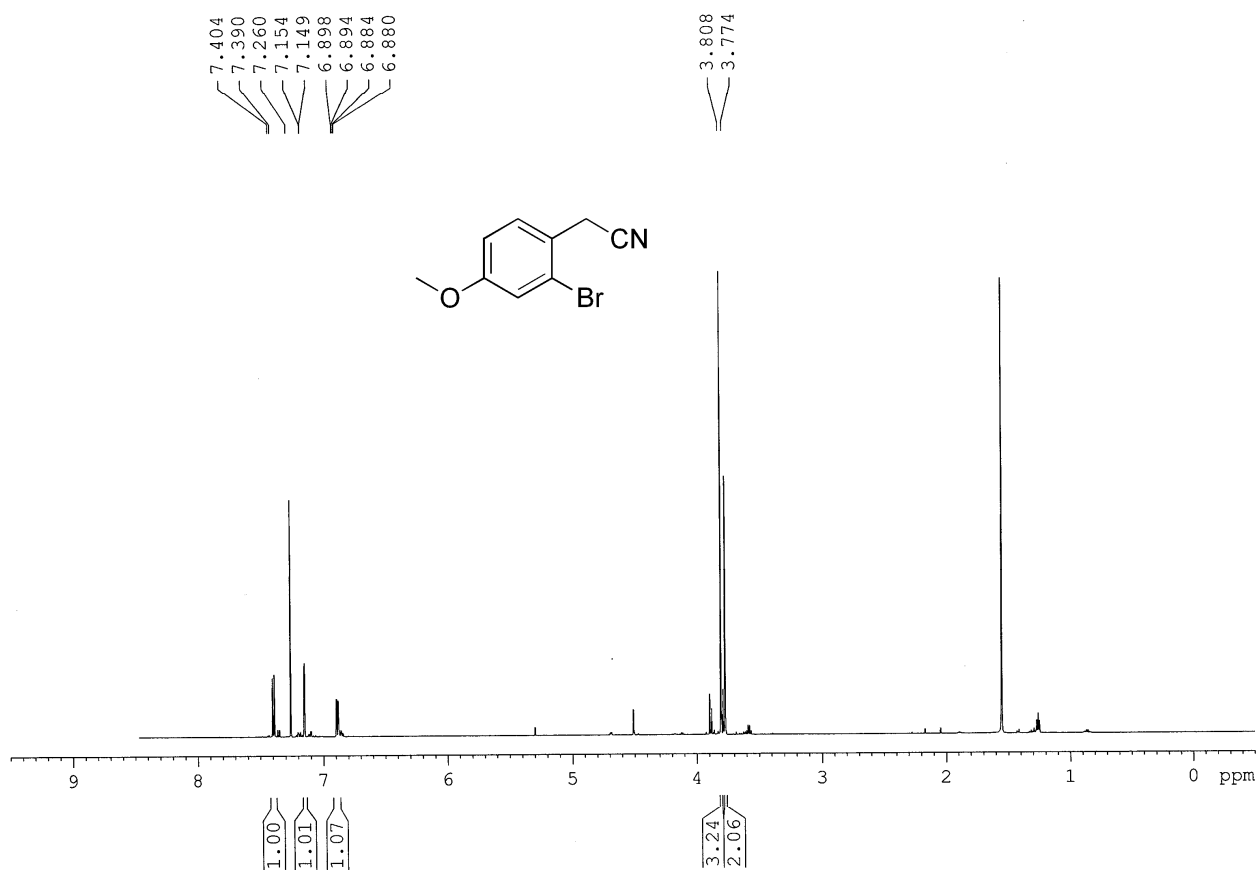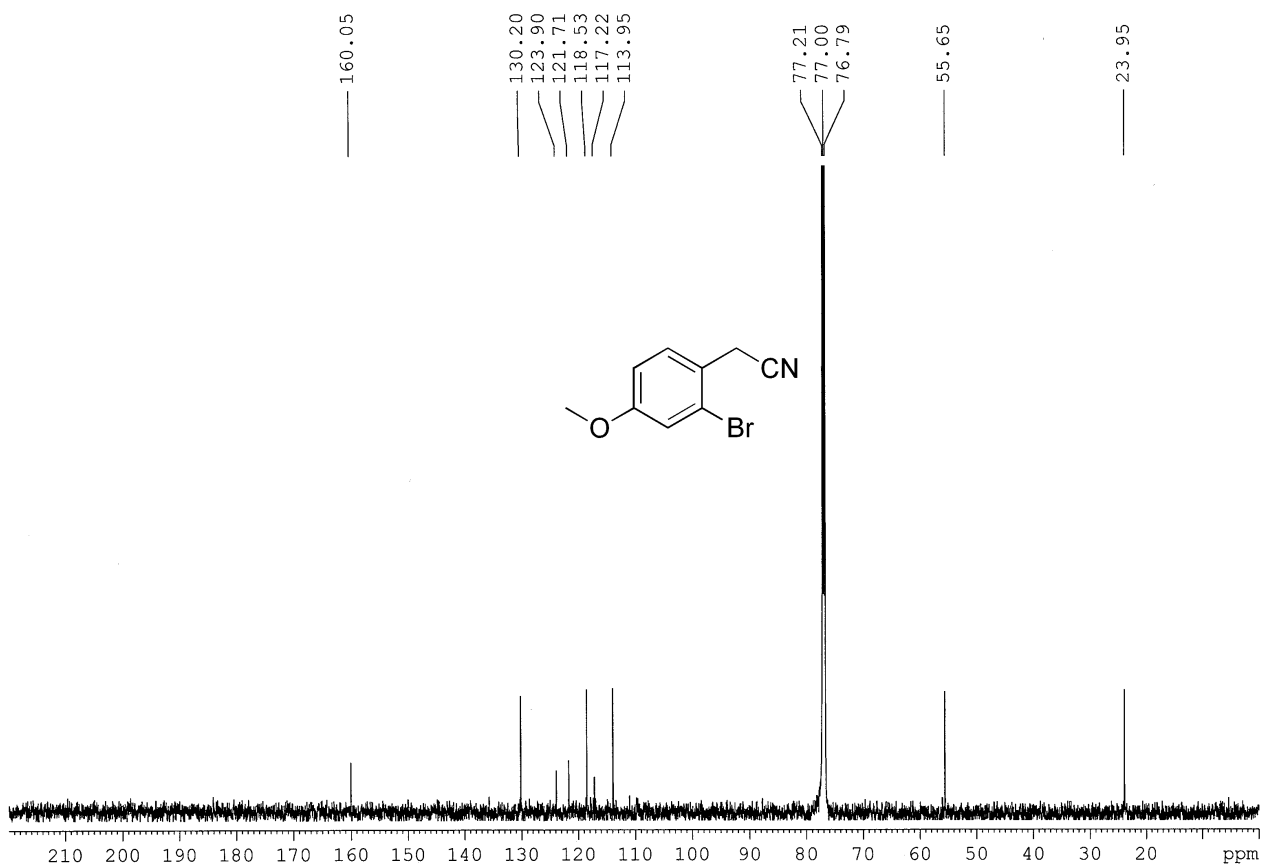

**2-(2-Bromo-4-methoxyphenyl)-2-methylpropanenitrile (1g)**

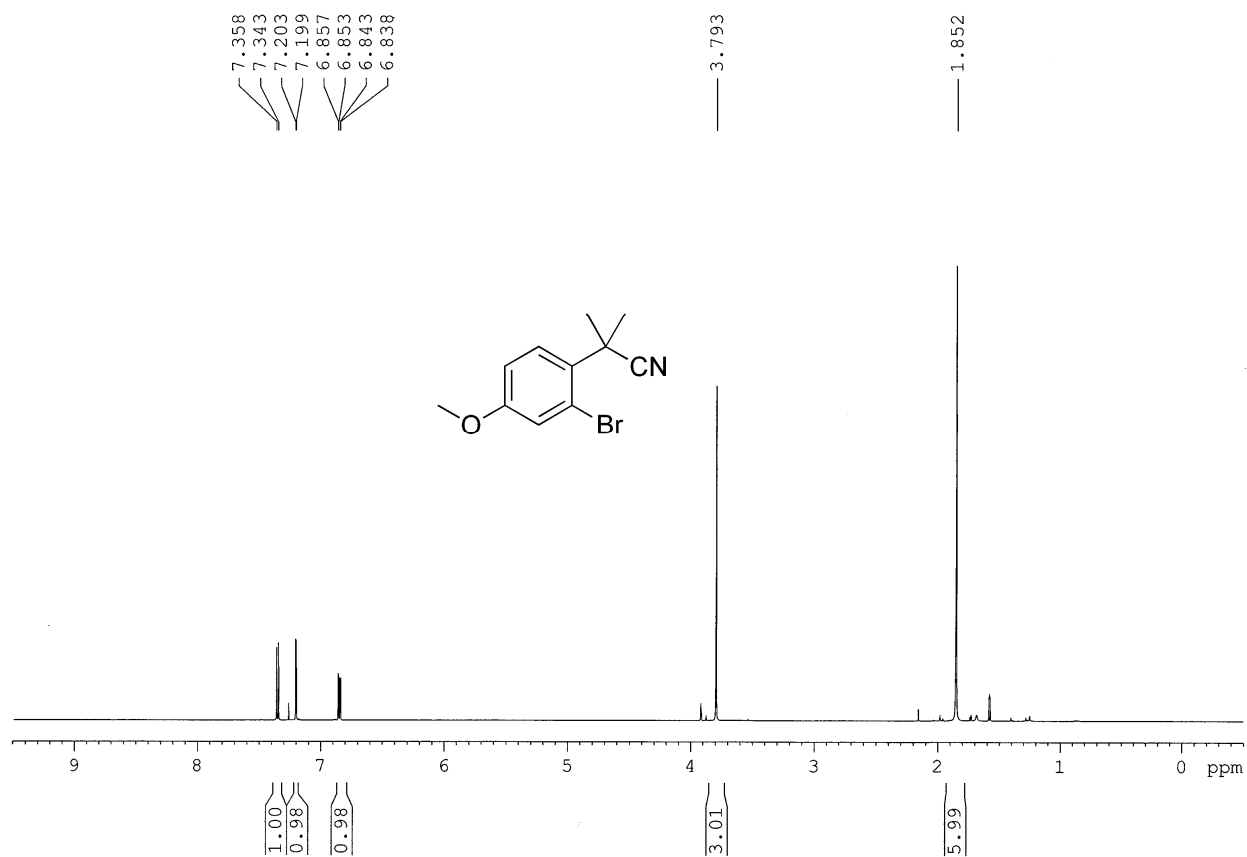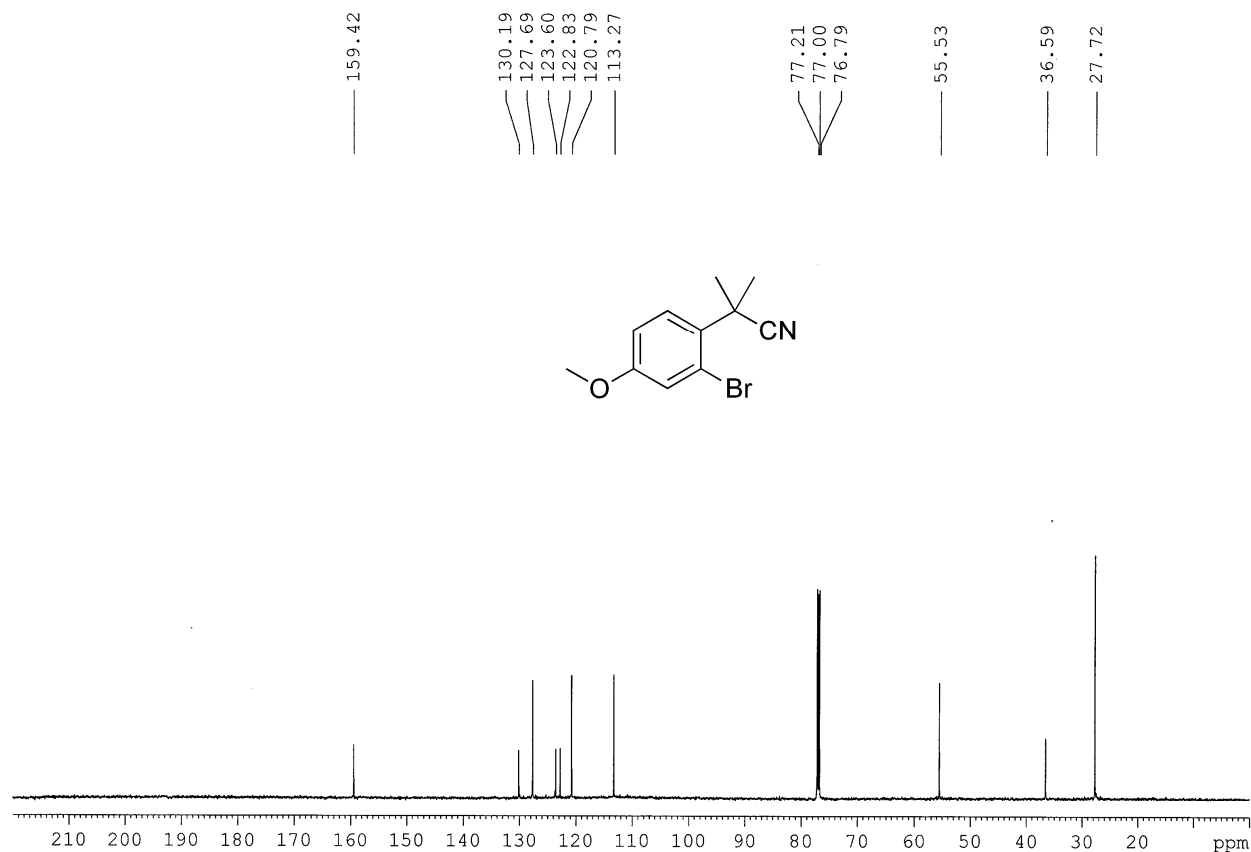

# 1-Bromo-2-(bromomethyl)-3-chlorobenzene (4h)

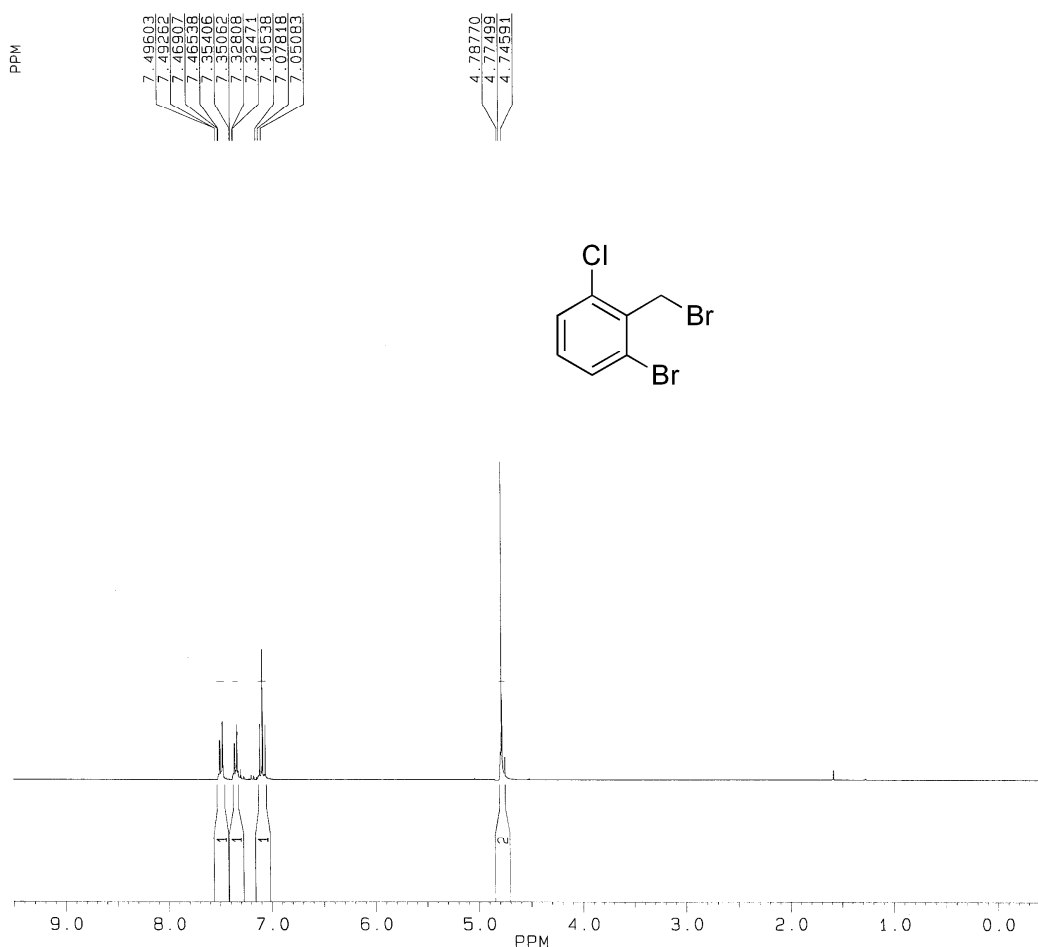

~~BRUKER~~

D0316.014  
DATE ??-??-??

SF 300.133  
SY 299.0  
O1 5018.332  
SI 16384  
TD 16384  
SW 4807.692  
HZ/PT .587

PW 1.4  
RD 1.000  
AQ 1.704  
RG 20  
NS 32  
TE 297

FW 6100  
O2 0.0  
DP 63L P0

LB 0.0  
GB 0.0  
CX 21.00  
CY 0.0  
F1 9.501P  
F2 - 499P  
HZ/CM 142.918  
PPM/CM .476  
SR 3367.55

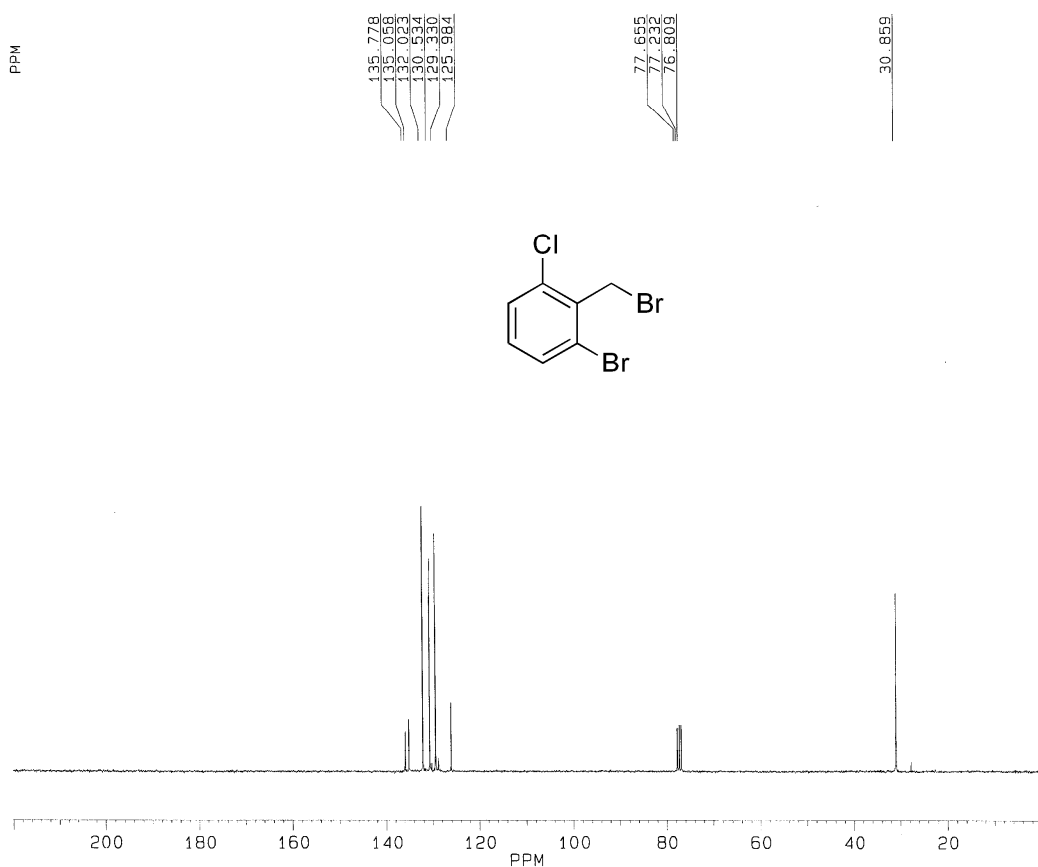

~~BRUKER~~

D0316.903  
DATE ??-??-??

SF 75.469  
SY 75.0  
O1 6517.695  
SI 32768  
TD 32768  
SW 19230.769  
HZ/PT 1.174

PW 1.4  
RD 1.500  
AQ .852  
RG 200  
NS 305  
TE 297

FW 24100  
O2 4869.082  
DP 15H CPD

LB 2.000  
GB 0.0  
CX 21.00  
CY 0.0  
F1 220.005P  
F2 .010P  
HZ/CM 790.606  
PPM/CM 10.476  
SR -1409.42

## 2-(2-Bromo-6-chlorophenyl)acetonitrile (5h)

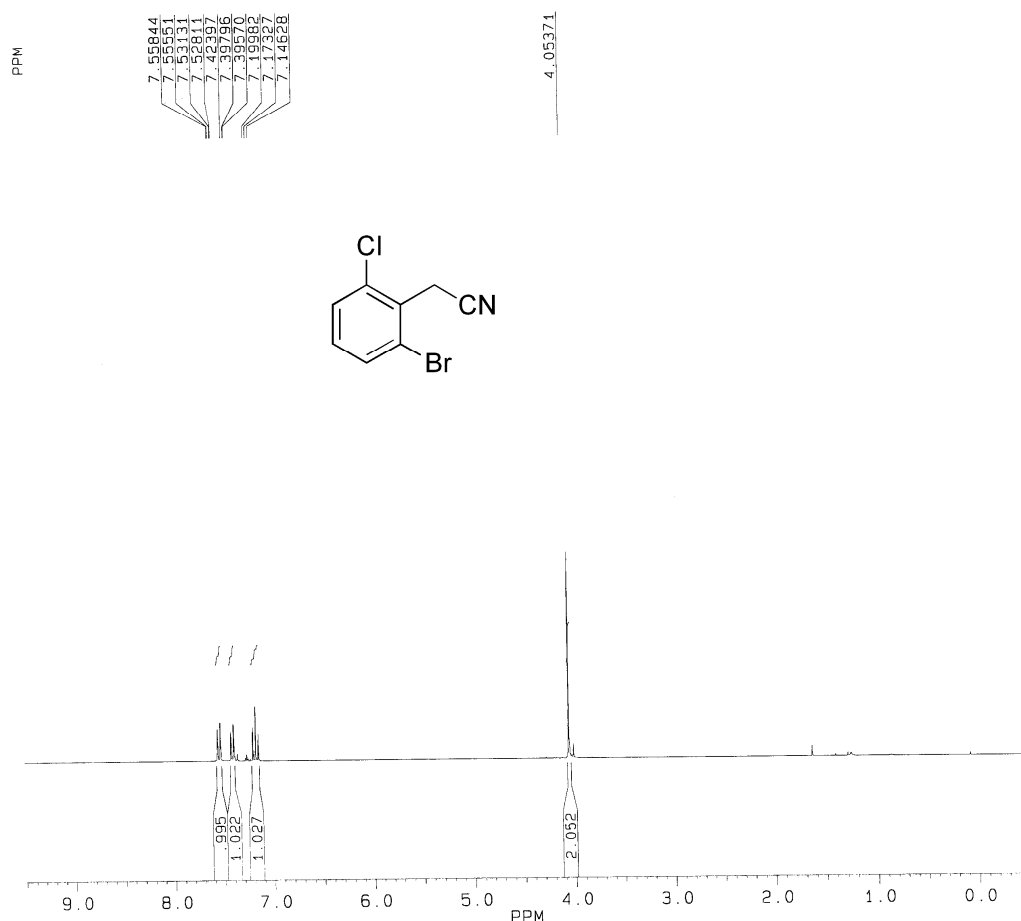

~~BRUKER~~

D0317.001  
DATE ??-??-??

SF 300.133  
SY 299.0  
O1 5018.332  
SI 16384  
TD 16384  
SW 4807.692  
HZ/PT .587

PW 1.4  
RD 1.000  
AQ 1.704  
RG 40  
NS 32  
TE 297

FW 6100  
O2 0.0  
DP 63L P0  
LB 0.0  
GB 0.0  
CX 21.00  
CY 0.0  
F1 9.501P  
F2 -.499P  
HZ/CM 142.918  
PPM/CM .476  
SR 3367.00

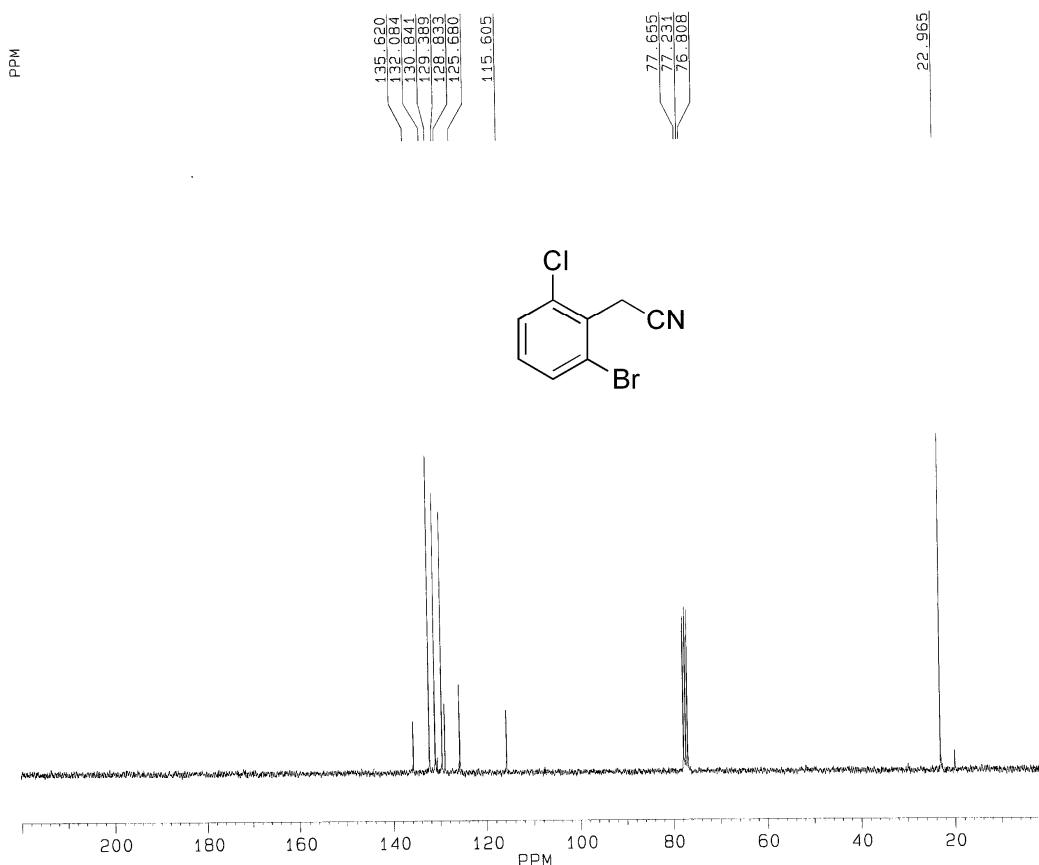

~~BRUKER~~

D0317.901  
DATE ??-??-??

SF 75.469  
SY 75.0  
O1 6517.695  
SI 32768  
TD 32768  
SW 19230.769  
HZ/PT 1.174

PW 1.4  
RD 1.500  
AQ .852  
RG 200  
NS 501  
TE 297

FW 24100  
O2 4869.082  
DP 15H CPD

LB 2.000  
GB 0.0  
CX 21.00  
CY 0.0  
F1 220.021P  
F2 .026P  
HZ/CM 790.606  
PPM/CM 10.476  
SR -1416.46

# 2-(2-Bromo-6-chlorophenyl)-2-methylpropanenitrile (1h)

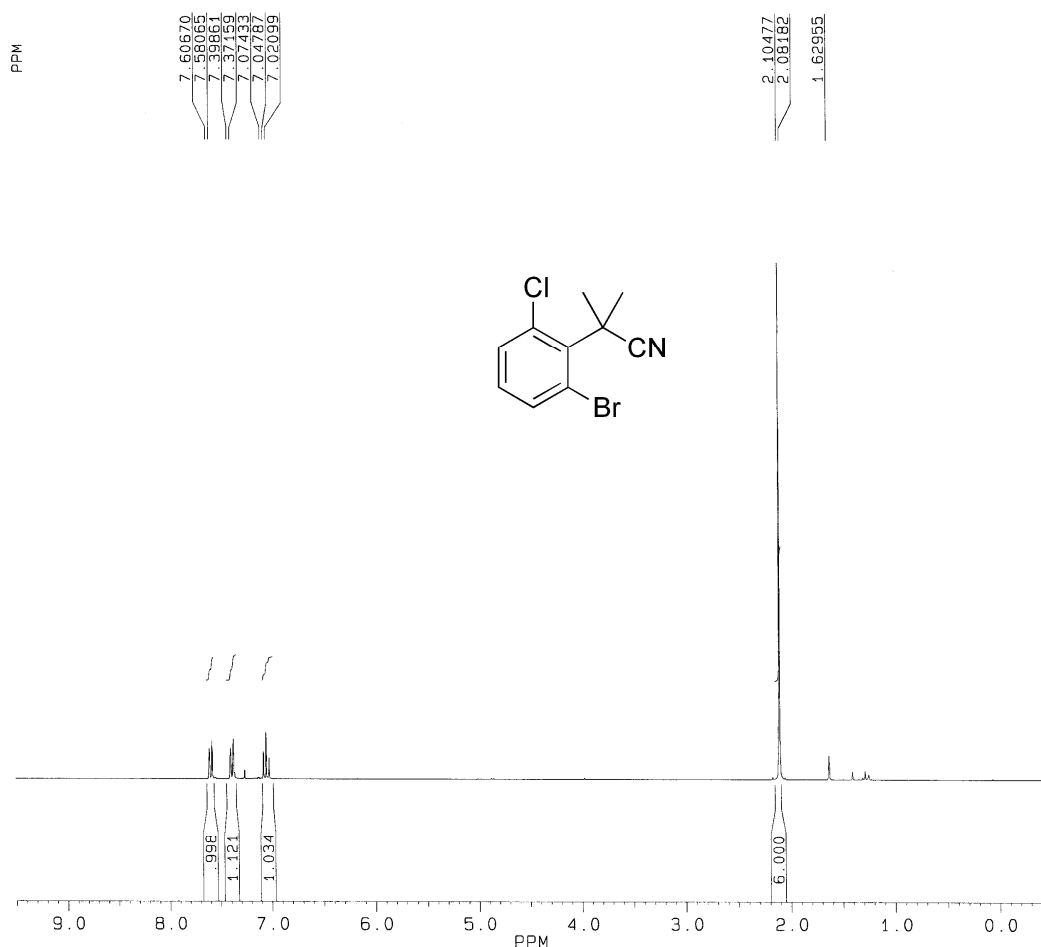

**BRUKER**

D0316.018  
DATE ??-??-??

SF 300.133  
SY 299.0  
Q1 5018.332  
SI 16384  
TD 16384  
SW 4807.692  
HZ/PT .587

PW 1.4  
RD 1.000  
AQ 1.704  
RG 40  
NS 32  
TE 297

FW 6100  
Q2 0.0  
DP 63L P0  
LB 0.0  
GB 0.0  
CX 21.00  
CY 0.0  
F1 9.501P  
F2 -.499P  
HZ/CM 142.918  
PPM/CM .476  
SR 3368.14

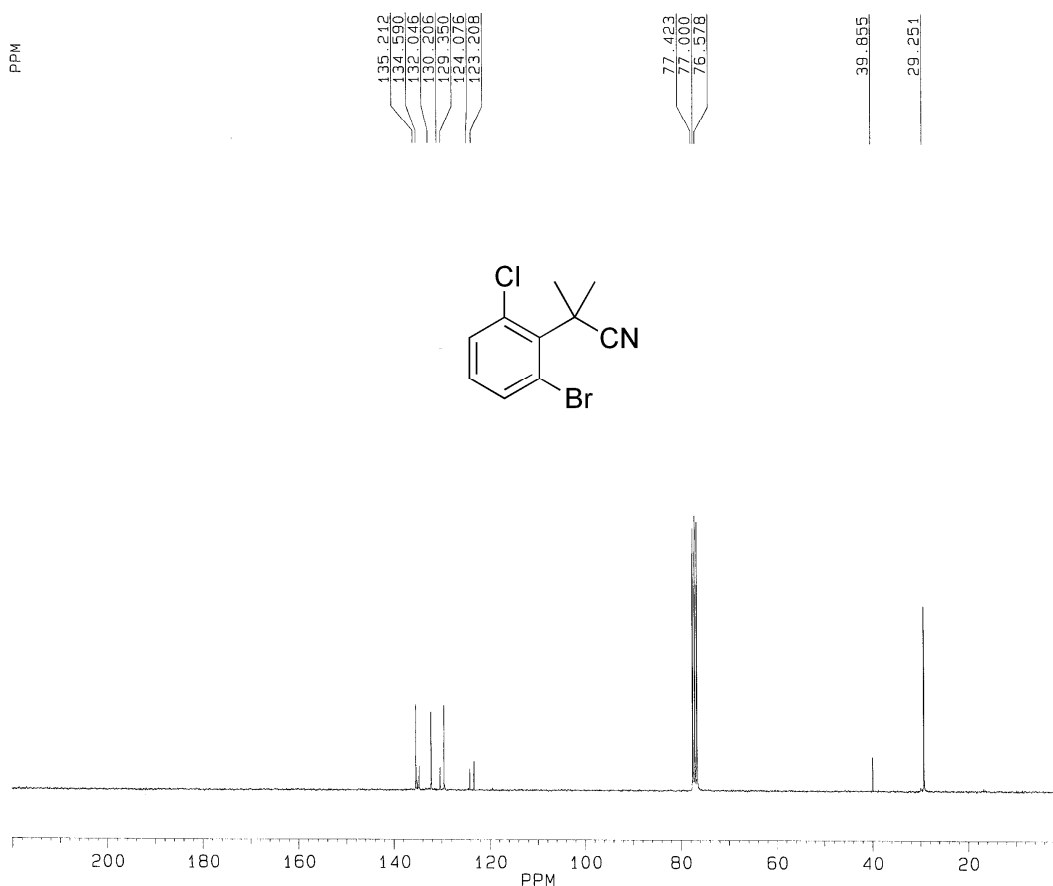

**BRUKER**

D0317.902  
DATE ??-??-??

SF 75.469  
SY 75.0  
Q1 6517.695  
SI 32768  
TD 32768  
SW 19230.769  
HZ/PT 1.174

PW 1.4  
RD 1.500  
AQ .852  
RG 200  
NS 3113  
TE 297

FW 24100  
Q2 4869.082  
DP 15H CPD

LB 2.000  
GB 0.0  
CX 21.00  
CY 0.0  
F1 220.009P  
F2 .013P  
HZ/CM 790.606  
PPM/CM 10.476  
SR -1402.62

## 2-(1-Bromonaphthalen-2-yl)acetonitrile (5i)

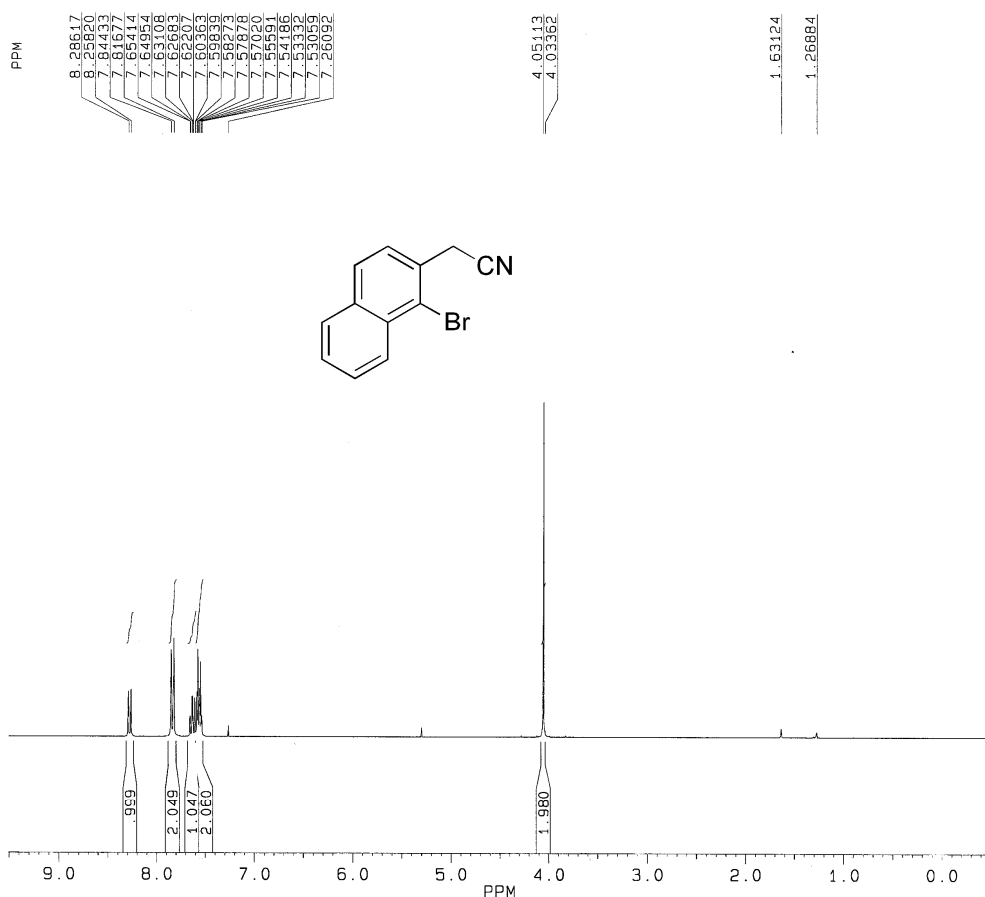

~~BRUKER~~

D0111.003  
DATE ??-??-??

SF 300.133  
SY 299.0  
Q1 5018.332  
SI 16384  
TD 16384  
SW 4807.692  
HZ/PT .587

PW 1.4  
RD 1.000  
AQ 1.704  
RG 40  
NS 32  
TE 297

FW 6100  
O2 0.0  
DP 63L P0  
LB 0.0  
GB 0.0  
CX 21.00  
CY 0.0  
F1 9.501P  
F2 -4.99P  
HZ/CM 142.918  
PPM/CM .476  
SR 3367.55

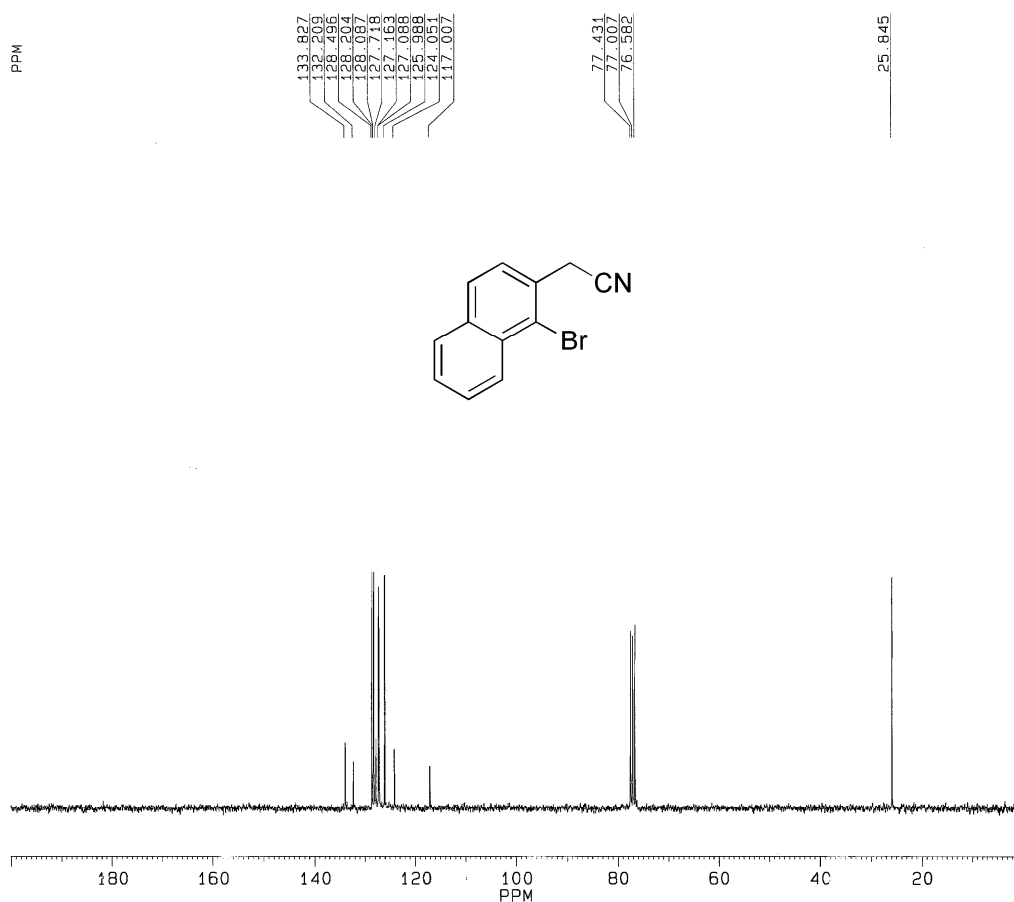

~~BRUKER~~

D0111.901  
DATE ??-??-??

SF 75.469  
SY 75.0  
Q1 6517.695  
SI 32768  
TD 32768  
SW 19230.769  
HZ/PT 1.174

PW 1.4  
RD 1.500  
AQ .852  
RG 160  
NS 300  
TE 297

FW 24100  
O2 4869.082  
DP 15H CPD

LB 2.000  
GB 0.0  
CX 21.00  
CY 0.0  
F1 200.023P  
F2 .029P  
HZ/CM 718.728  
PPM/CM 9.524  
SR -1399.10

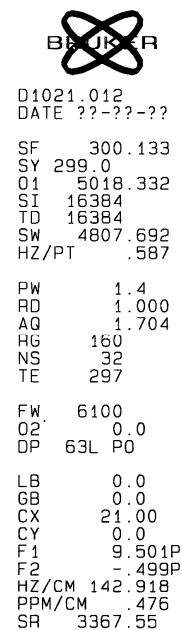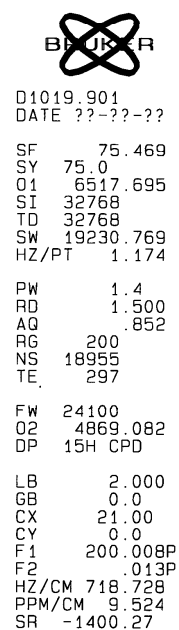

# 2-(2-Bromopyridin-3-yl)acetonitrile (5j)

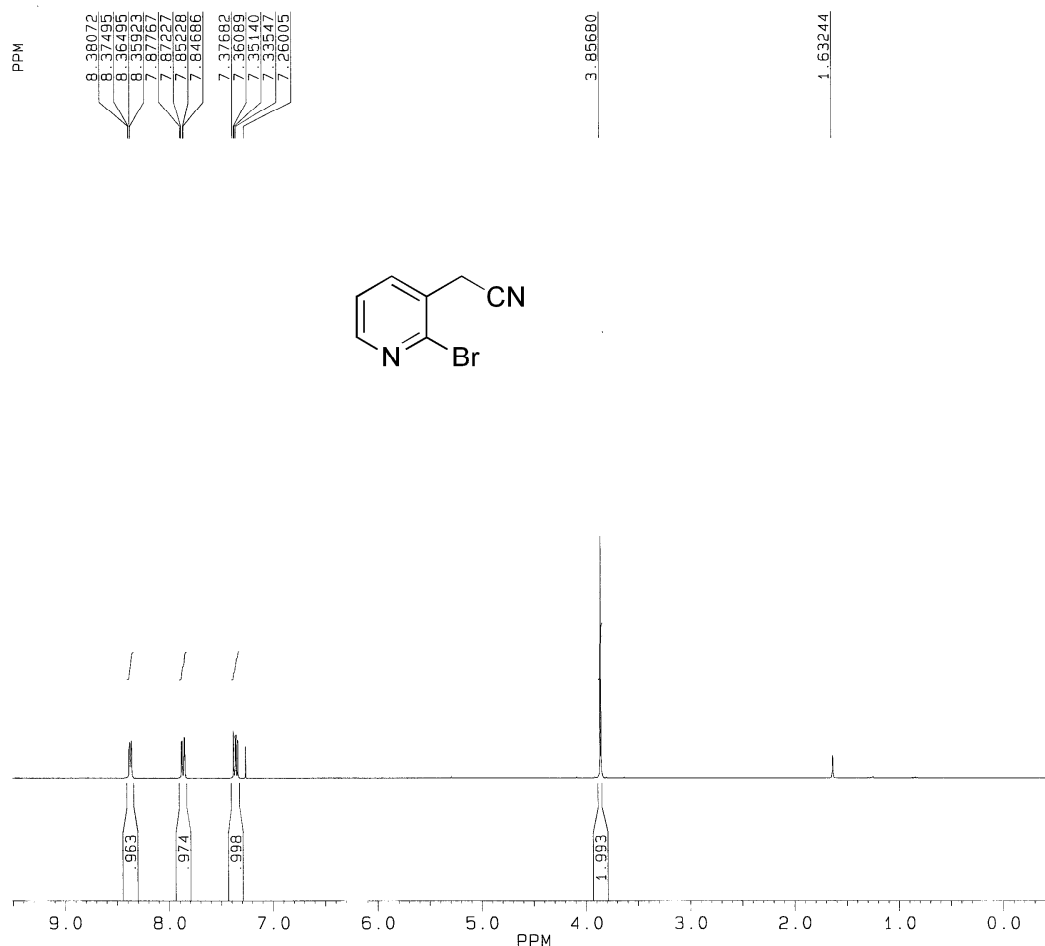



# 2-(2-Bromopyridin-3-yl)-2-methylpropanenitrile (1j)

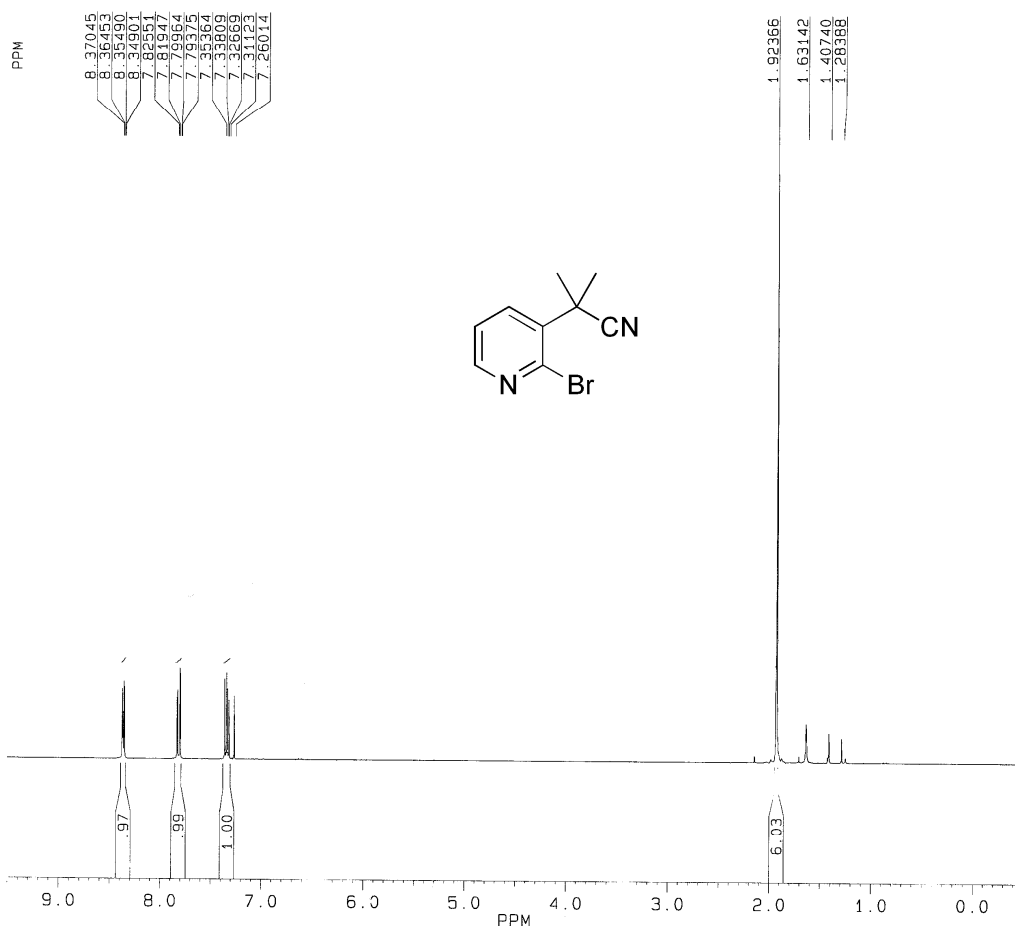

**BRUKER**

D0908.010  
DATE ??-??-??

SF 300.133  
SY 299.0  
Q1 5018.332  
SI 16384  
TD 16384  
SW 4807.692  
HZ/PT .587

PW 1.4  
RD 1.000  
AQ 1.704  
RG 160  
NS 32  
TE 297

FW 6100  
Q2 0.0  
DP 63L P0

LB 0.0  
GB 0.0  
CX 21.00  
CY 0.0  
F1 9.501P  
F2 -.499P  
HZ/CM 142.918  
PPM/CM .476  
SR 3367.55

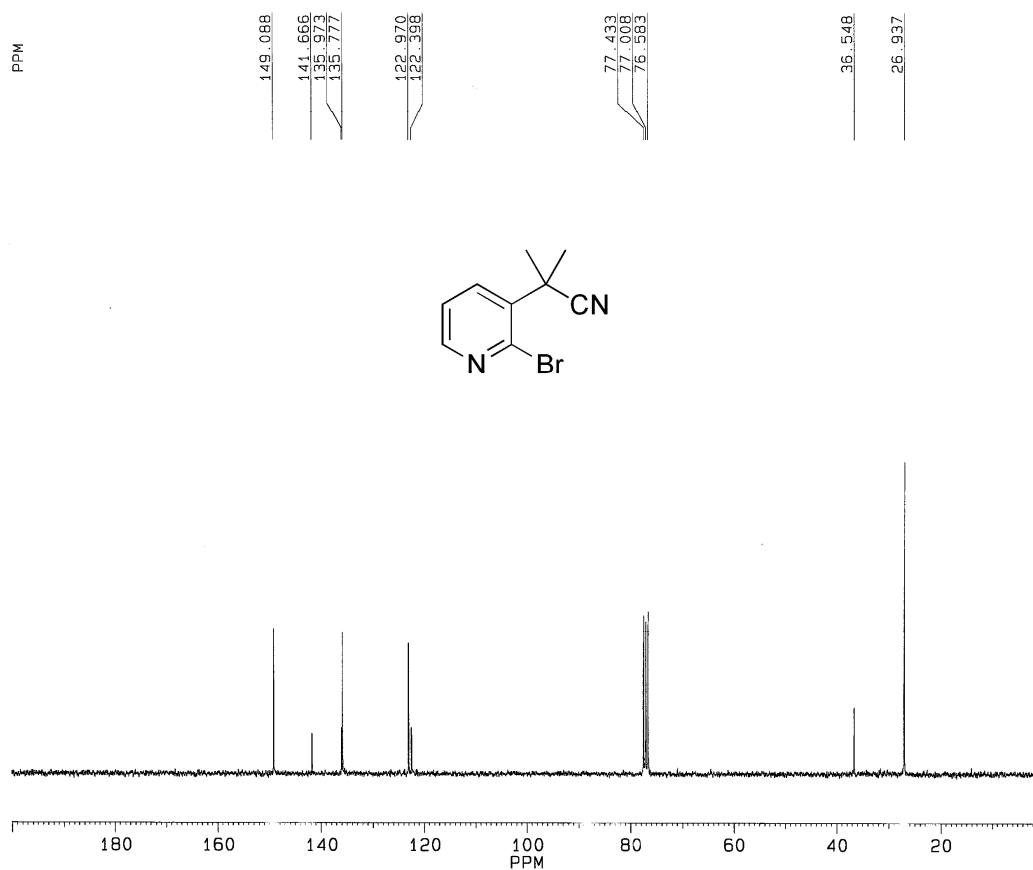

**BRUKER**

D1215.904  
DATE ??-??-??

SF 75.469  
SY 75.0  
Q1 6517.695  
SI 32768  
TD 32768  
SW 19230.769  
HZ/PT 1.174

PW 1.4  
RD 1.500  
AQ .852  
RG 160  
NS 150  
TE 297

FW 24100  
Q2 4869.082  
DP 15H CPD

LB 2.000  
GB 0.0  
CX 21.00  
CY 0.0  
F1 200.008P  
F2 .013P  
HZ/CM 718.728  
PPM/CM 9.524  
SR -1396.75

# 2-(2-Bromophenyl)-2-ethylbutanenitrile (1k)

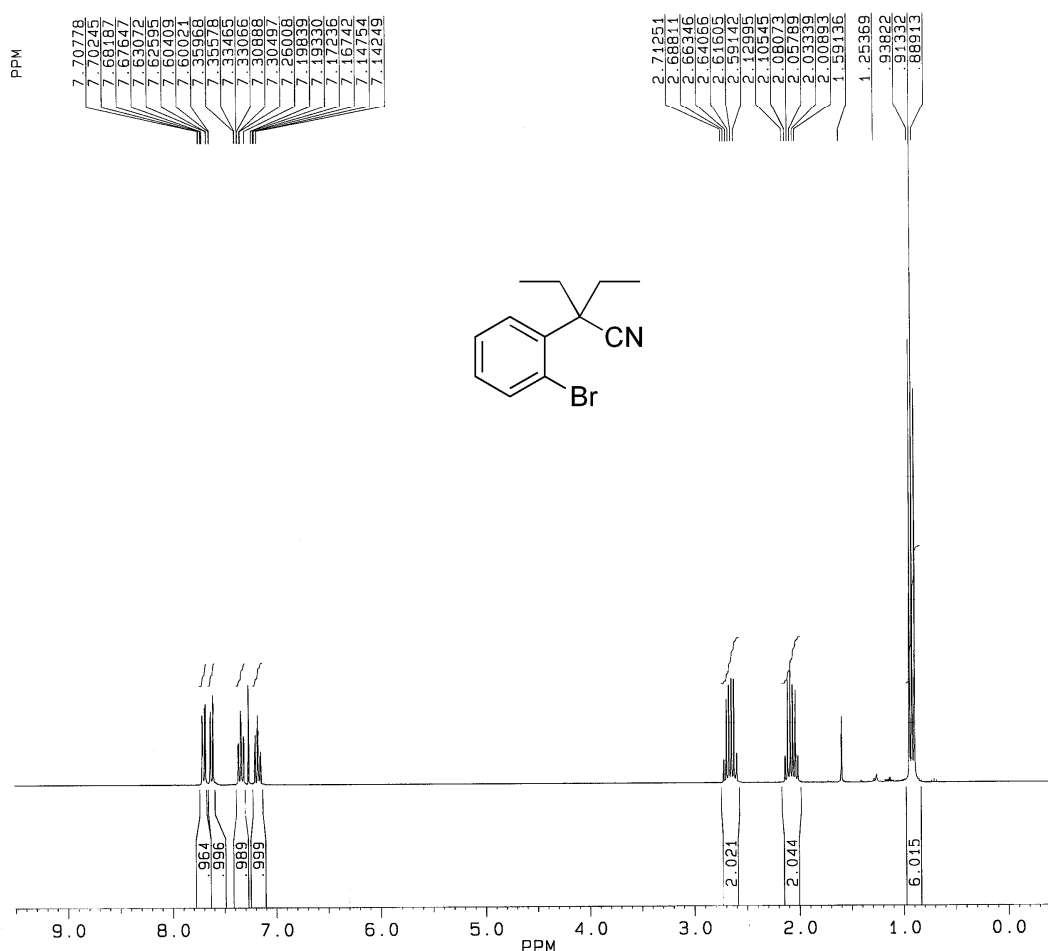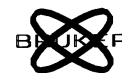

D1126.004  
DATE ??-??-??

SF 300.133  
SY 299.0  
O1 5018.332  
SI 16384  
TD 16384  
SW 4807.692  
HZ/PT .587

PW 1.4  
RD 1.000  
AQ 1.704  
RG 80  
NS 32  
TE 297

FW 6100  
O2 0.0  
DP 63L P0

LB 0.0  
GB 0.0  
CX 21.00  
CY 0.0  
F1 9.501P  
F2 -1.499P  
HZ/CM 142.918  
PPM/CM .476  
SR 3367.55

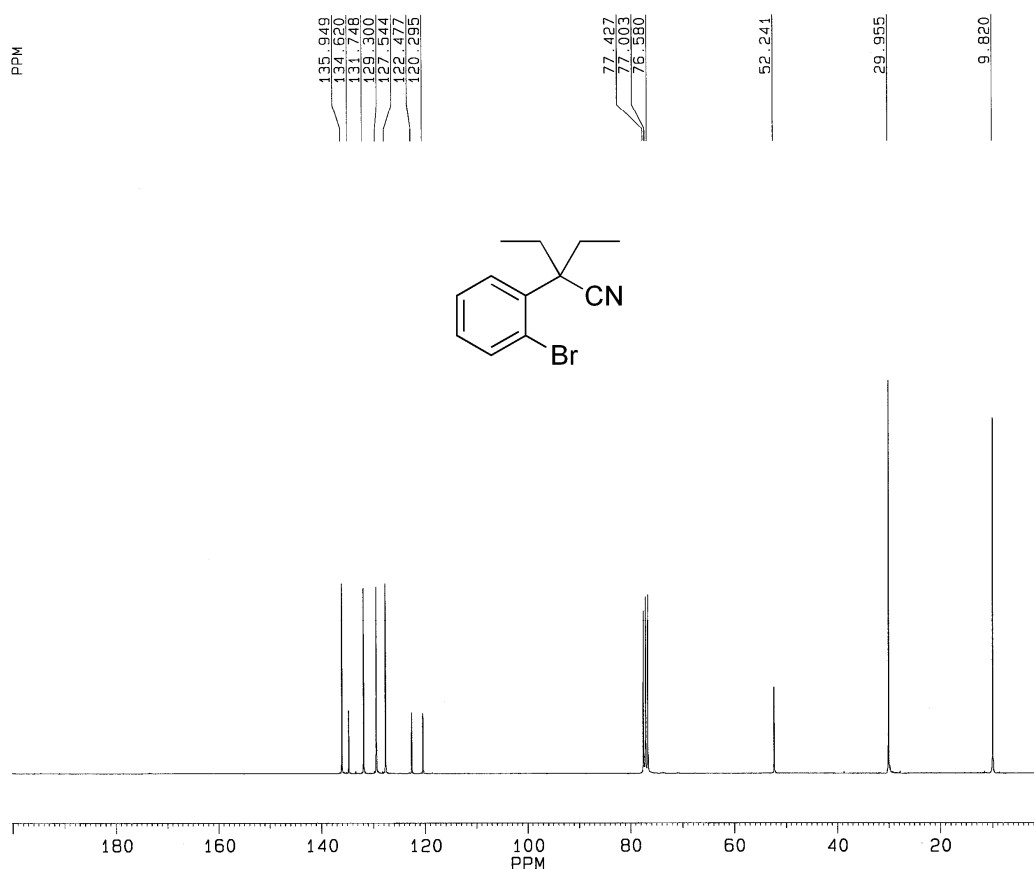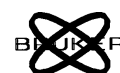

D1124.903  
DATE ??-??-??

SF 75.469  
SY 75.0  
O1 6517.695  
SI 32768  
TD 32768  
SW 19230.769  
HZ/PT 1.174

PW 1.4  
RD 1.500  
AQ .852  
RG 200  
NS 18563  
TE 297

FW 24100  
O2 4869.082  
DP 15H CPD

LB 2.000  
GB 0.0  
CX 21.00  
CY 0.0  
F1 200.008P  
F2 .013P  
HZ/CM 718.728  
PPM/CM 9.524  
SR -1400.27

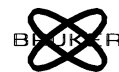

|        |         |
|--------|---------|
| FW.    | 6100    |
| O2     | 0.0     |
| DP     | 63L P0  |
| LB     | 0.0     |
| GB     | 0.0     |
| CX     | 21.00   |
| CY     | 0.0     |
| F1     | 9.501F  |
| F2     | -.499F  |
| HZ/CM  | 142.918 |
| PPM/CM | .476    |
| SR     | 3368.14 |

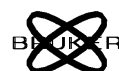

```
FW      24100
O2      4869.082
DP      15H CPD

LB              2.000
GB              0.0
CX              21.00
CY              0.0
F1          200.008P
F2              .013P
HZ/CM      718.728
PPM/CM      9.524
SR      -1406.14
```

# 2-(2-Bromophenyl)-2-methoxyacetonitrile (5m)

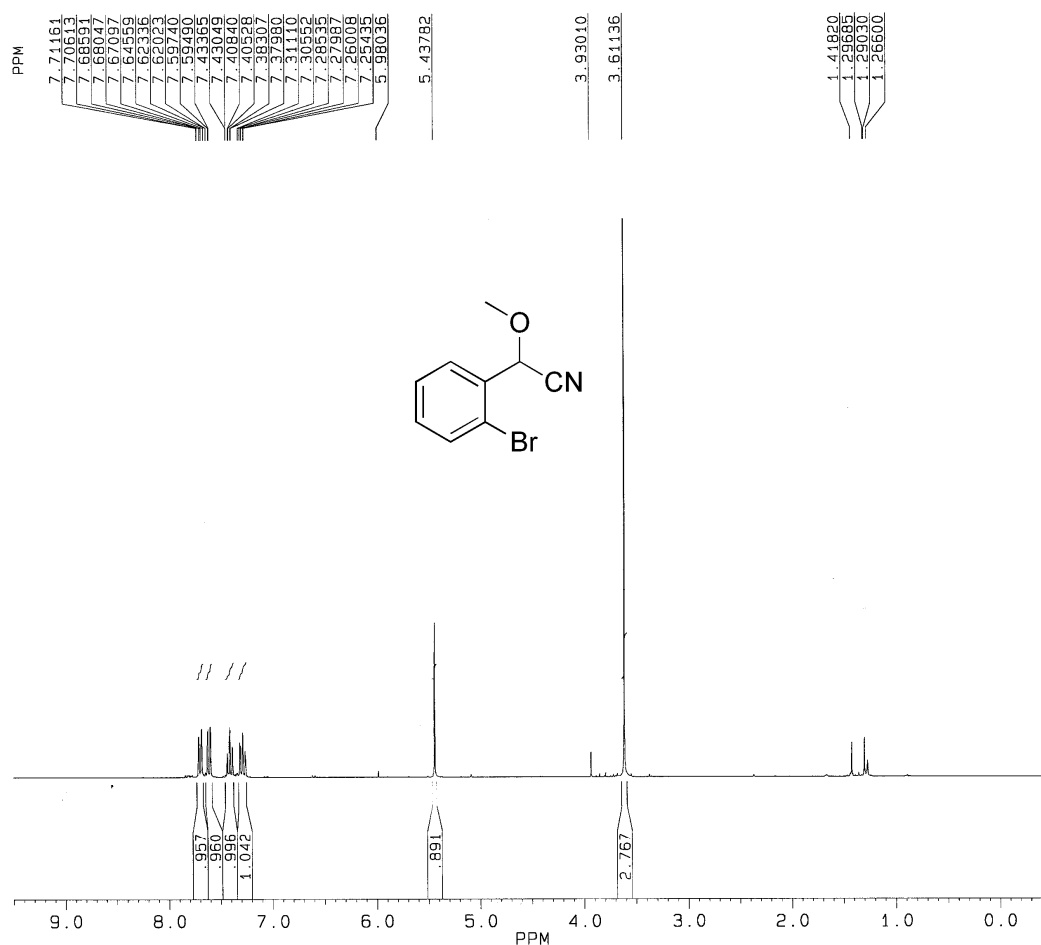

**BRUKER**

D1222.020  
DATE ??-??-??

SF 300.133  
SY 299.0  
O1 5018.332  
SI 16384  
TD 16384  
SW 4807.692  
HZ/PT .587

PW 1.4  
RD 1.000  
AQ 1.704  
RG 20  
NS 16  
TE 297

FW 6100  
O2 0.0  
DP 63L P0  
LB 0.0  
GB 0.0  
CX 21.00  
CY 0.0  
F1 9.501P  
F2 -.499P  
HZ/CM 142.918  
PPM/CM .476  
SR 3367.55

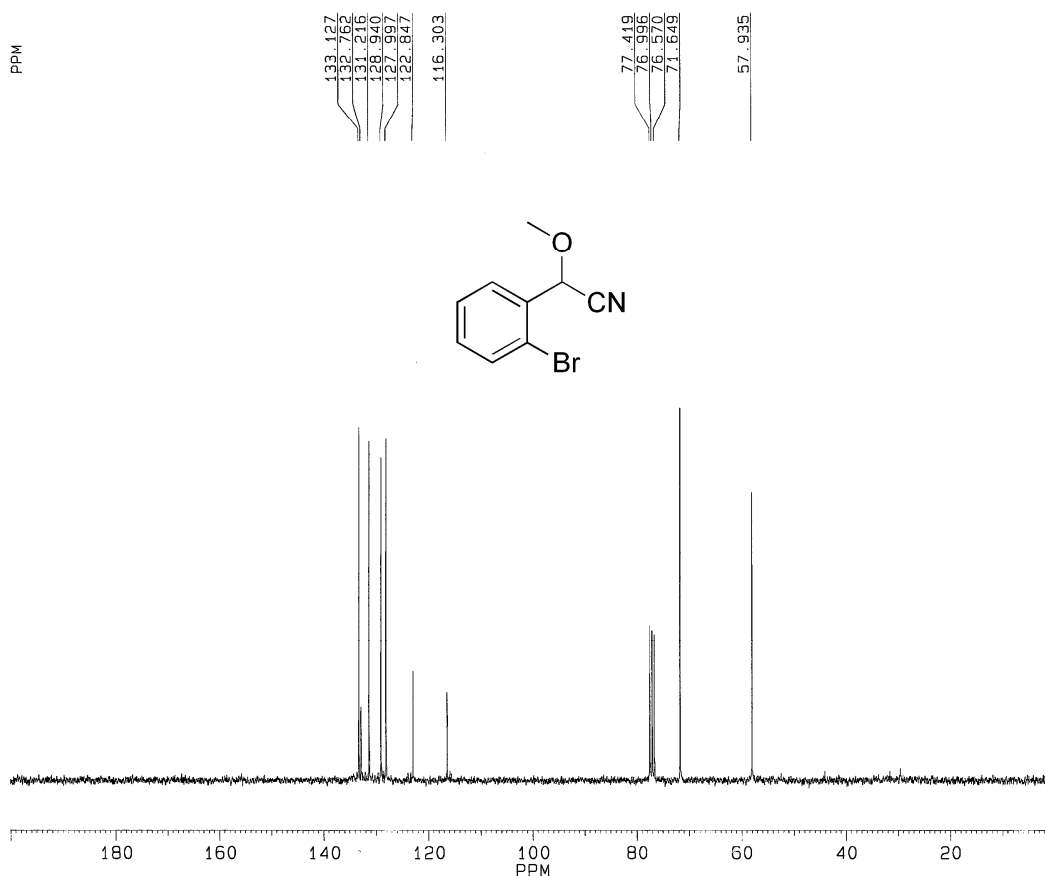

**BRUKER**

D1222.903  
DATE ??-??-??

SF 75.469  
SY 75.0  
O1 6517.695  
SI 32768  
TD 32768  
SW 19230.769  
HZ/PT 1.174

PW 1.4  
RD 1.500  
AQ .852  
RG 160  
NS 250  
TE 297

FW 24100  
O2 4869.082  
DP 15H CPD  
LB 2.000  
GB 0.0  
CX 21.00  
CY 0.0  
F1 200.008P  
F2 .013P  
HZ/CM 718.728  
PPM/CM 9.524  
SR -1395.58

# 2-(2-Bromophenyl)-2-methoxybutanenitrile (1m)

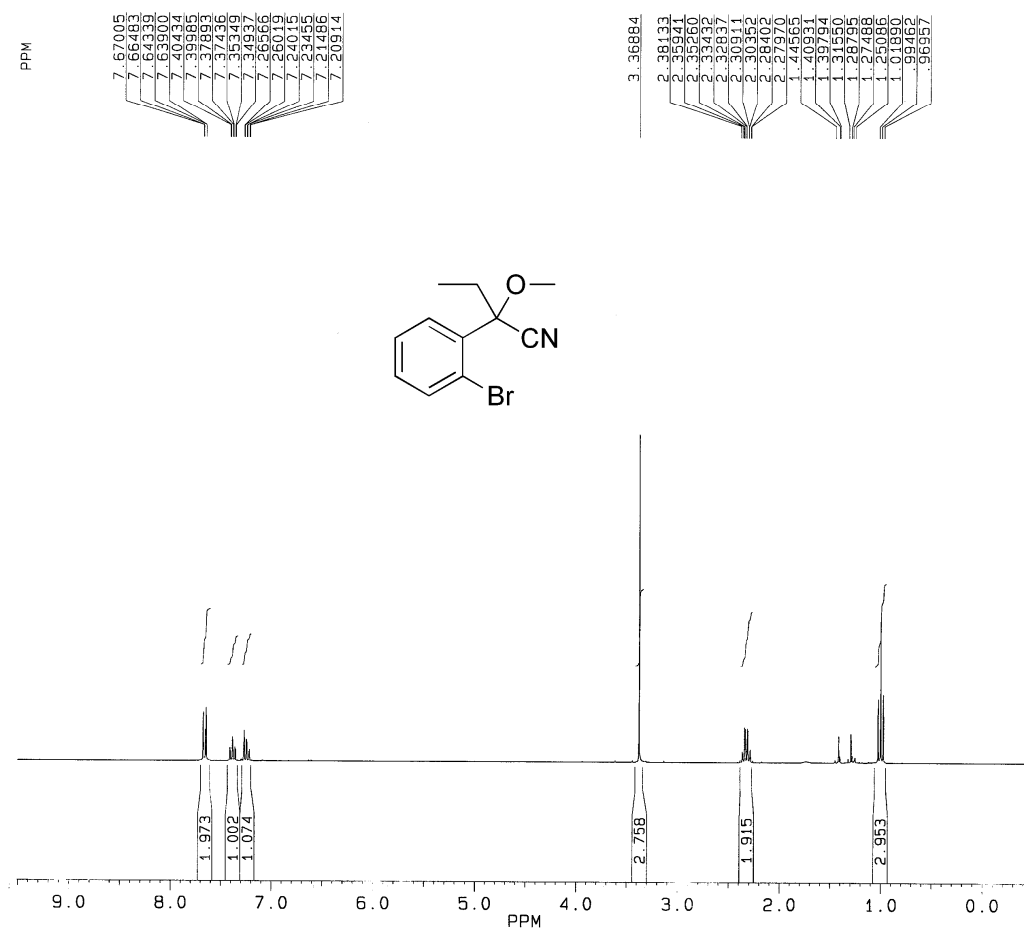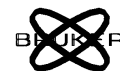

D1216.011  
DATE ??-??-??

SF 300.133  
SY 299.0  
O1 5018.332  
SI 16384  
TD 16384  
SW 4807.692  
HZ/PT .587

PW 1.4  
RD 1.000  
AQ 1.704  
RG 40  
NS 32  
TE 297

FW 6100  
O2 0.0  
DP 63L PD

LB 0.0  
GB 0.0  
CX 21.00  
CY 0.0  
F1 9.501P  
F2 -.499P  
HZ/CM 142.918  
PPM/CM .476  
SR 3367.55

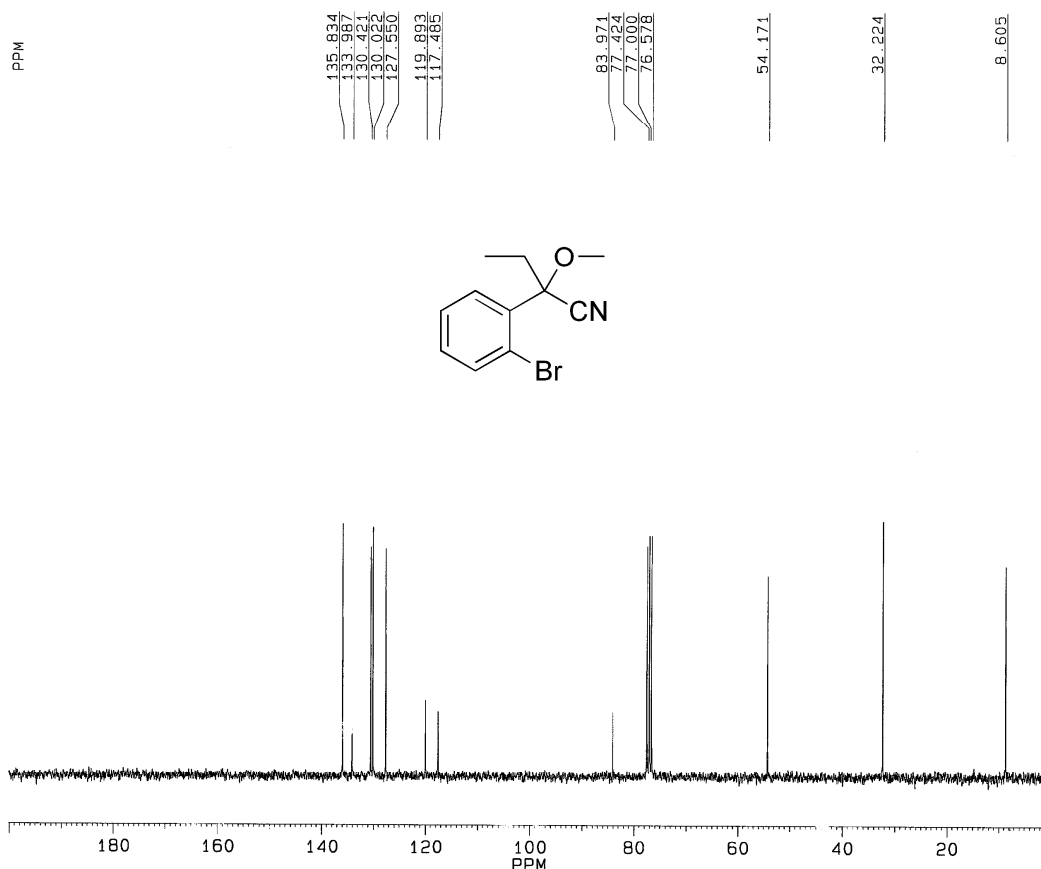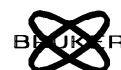

D1216.901  
DATE ??-??-??

SF 75.469  
SY 75.0  
O1 6517.695  
SI 32768  
TD 32768  
SW 19230.769  
HZ/PT 1.174

PW 1.4  
RD 1.500  
AQ .852  
RG 200  
NS 300  
TE 297

FW 24100  
O2 4869.082  
DP 15H CPD

LB 2.000  
GB 0.0  
CX 21.00  
CY 0.0  
F1 200.008P  
F2 .013P  
HZ/CM 718.728  
PPM/CM 9.524  
SR -1402.62

2-(2-Bromophenyl)-2-isopropoxyacetonitrile (5n)

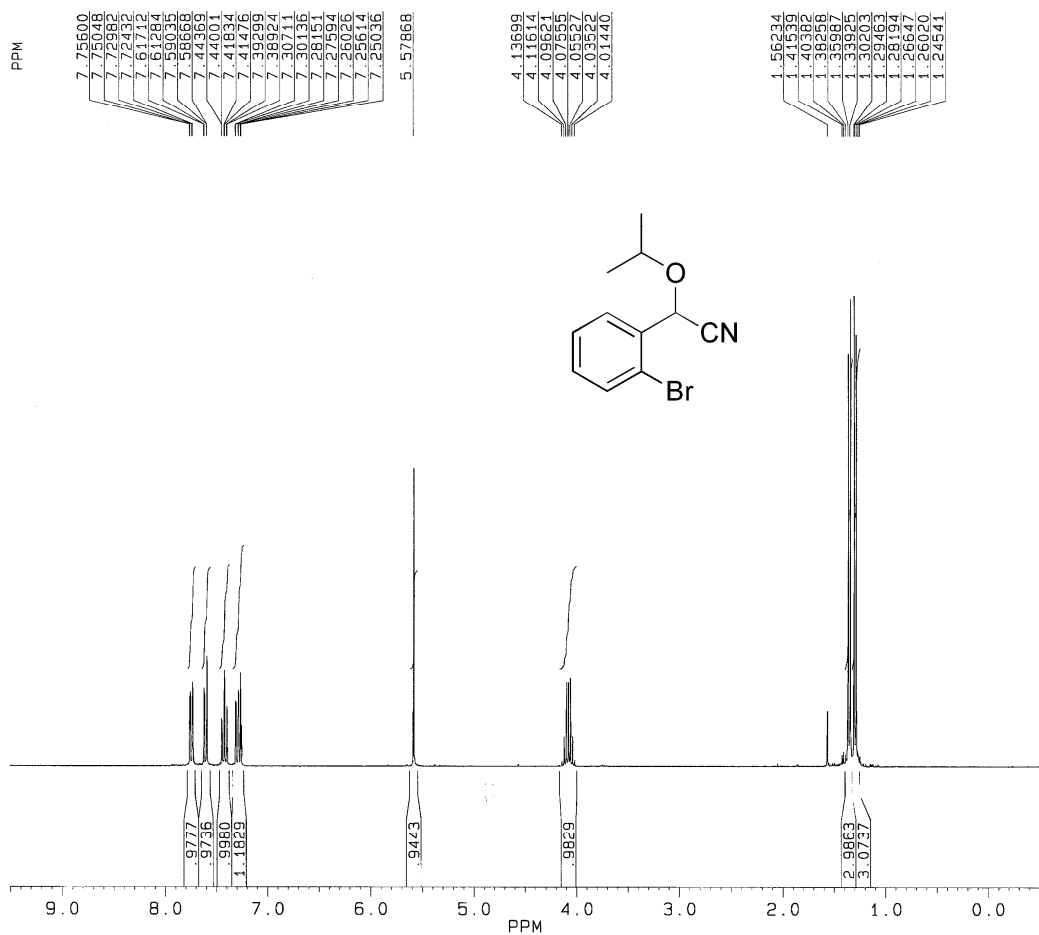

~~BOOKER~~

D1231.008  
DATE ??-??-??

SF 300.133  
SY 299.0  
O1 5018.332  
SI 16384  
TD 16384  
SW 4807.692  
HZ/PT .587

PW 1.4  
RD 1.000  
AQ 1.704  
RG 100  
NS 32  
TE 297

FW 6100  
O2 0.0  
DP 63L P0

LB 0.0  
GB 0.0  
CX 21.00  
CY 0.0  
F1 9.501P  
F2 - .499P  
HZ/CM 142.918  
PPM/CM .476  
SR 3367.55

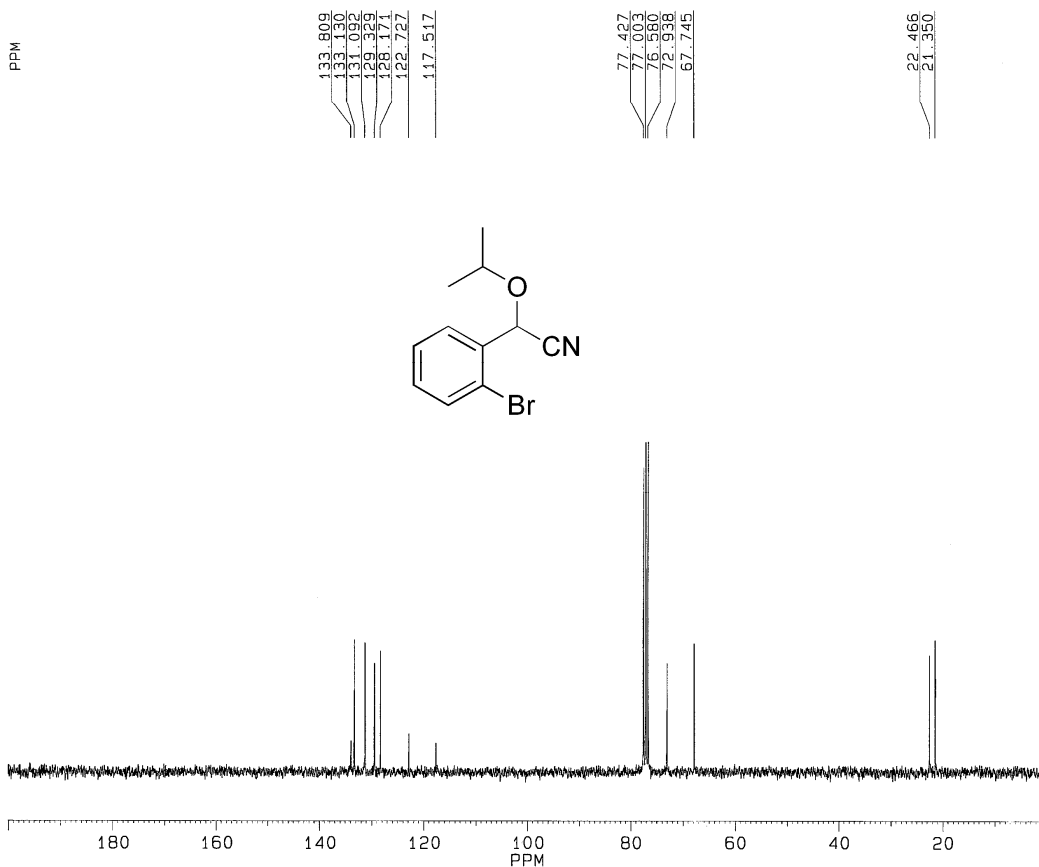

~~BOOKER~~

D1231.901  
DATE ??-??-??

SF 75.469  
SY 75.0  
O1 6517.695  
SI 32768  
TD 32768  
SW 19230.769  
HZ/PT 1.174

PW 1.4  
RD 1.500  
AQ .852  
RG 160  
NS 500  
TE 297

FW 24100  
O2 4869.082  
DP 15H CPD

LB 2.000  
GB 0.0  
CX 21.00  
CY 0.0  
F1 200.008P  
F2 .013P  
HZ/CM 718.728  
PPM/CM 9.524  
SR -1404.97

## 2-(2-Bromophenyl)-2-isopropoxybutanenitrile (1n)

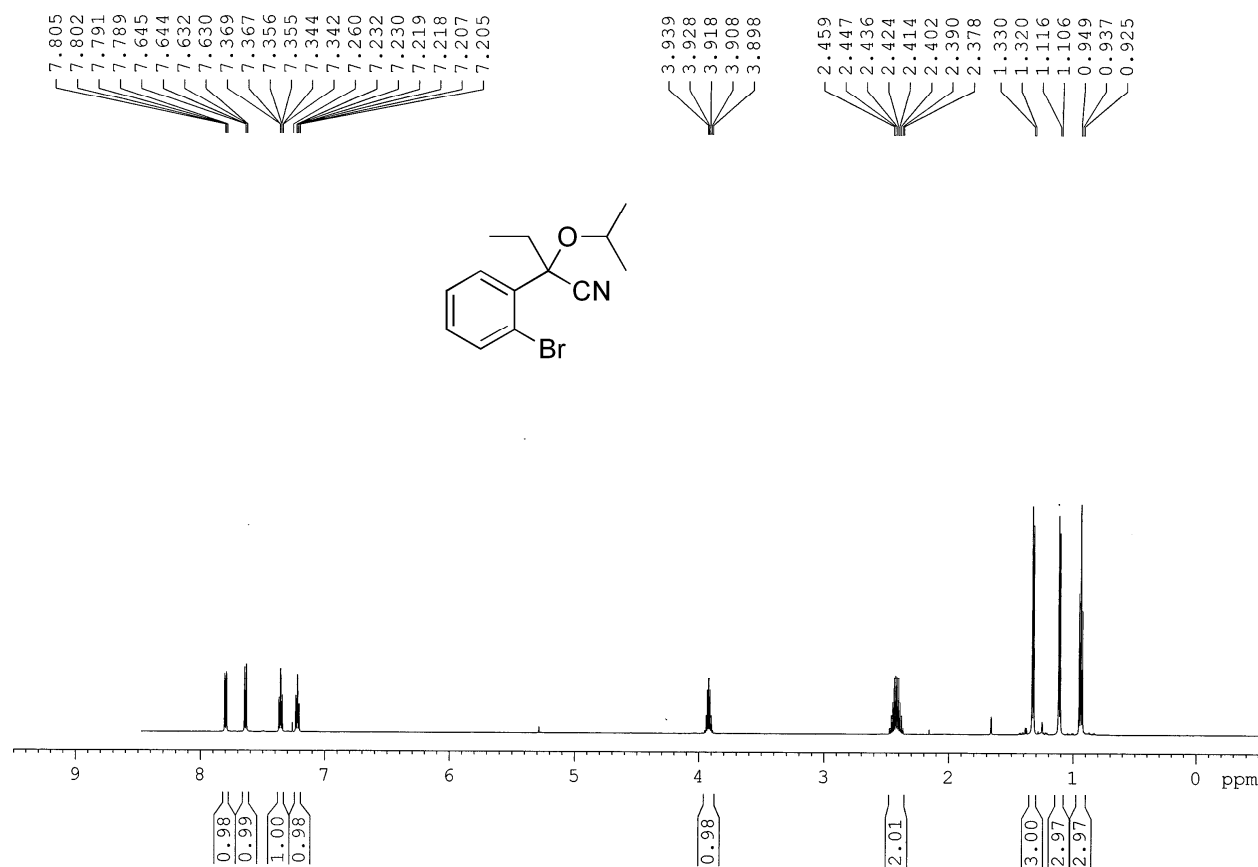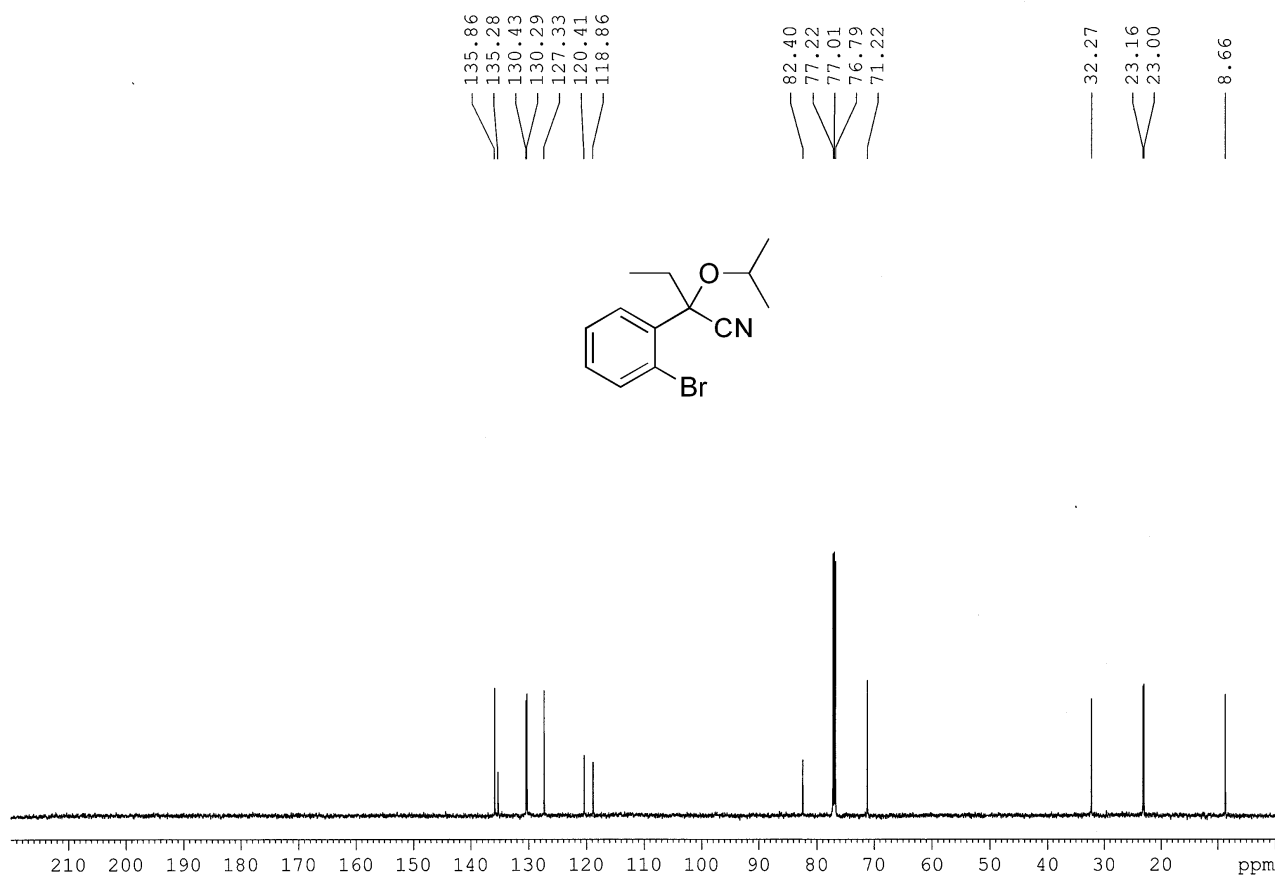

# 2-Bromo-2-(2-bromophenyl)acetonitrile (4o)

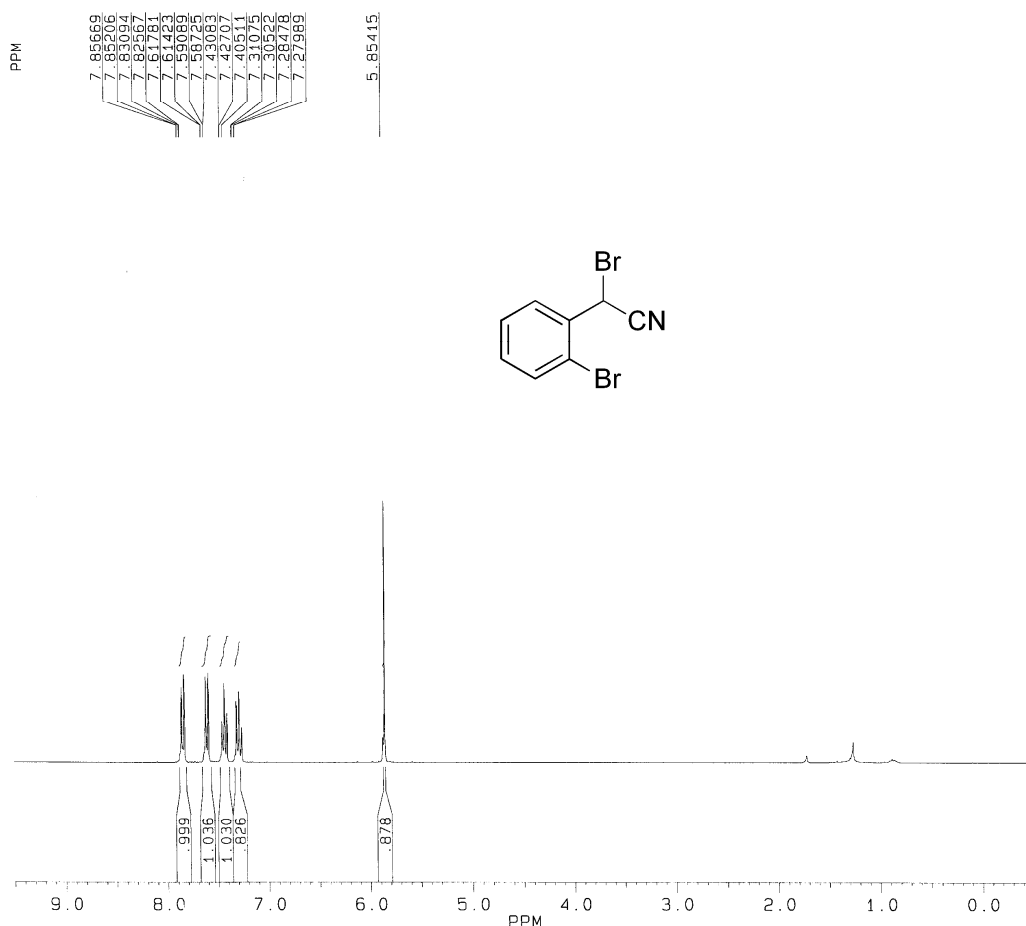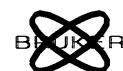

D0214.019  
DATE ??-??-??

SF 300.133  
SY 299.0  
Q1 5018.332  
SI 16384  
TD 16384  
SW 4807.692  
HZ/PT .587

PW 1.4  
RD 1.000  
AQ 1.704  
RG 20  
NS 32  
TE 297

FW 6100  
O2 0.0  
DP 63L P0  
LB 0.0  
GB 0.0  
CX 21.00  
CY 0.0  
F1 9.501P  
F2 -.499P  
HZ/CM 142.918  
PPM/CM .476  
SR 3367.55

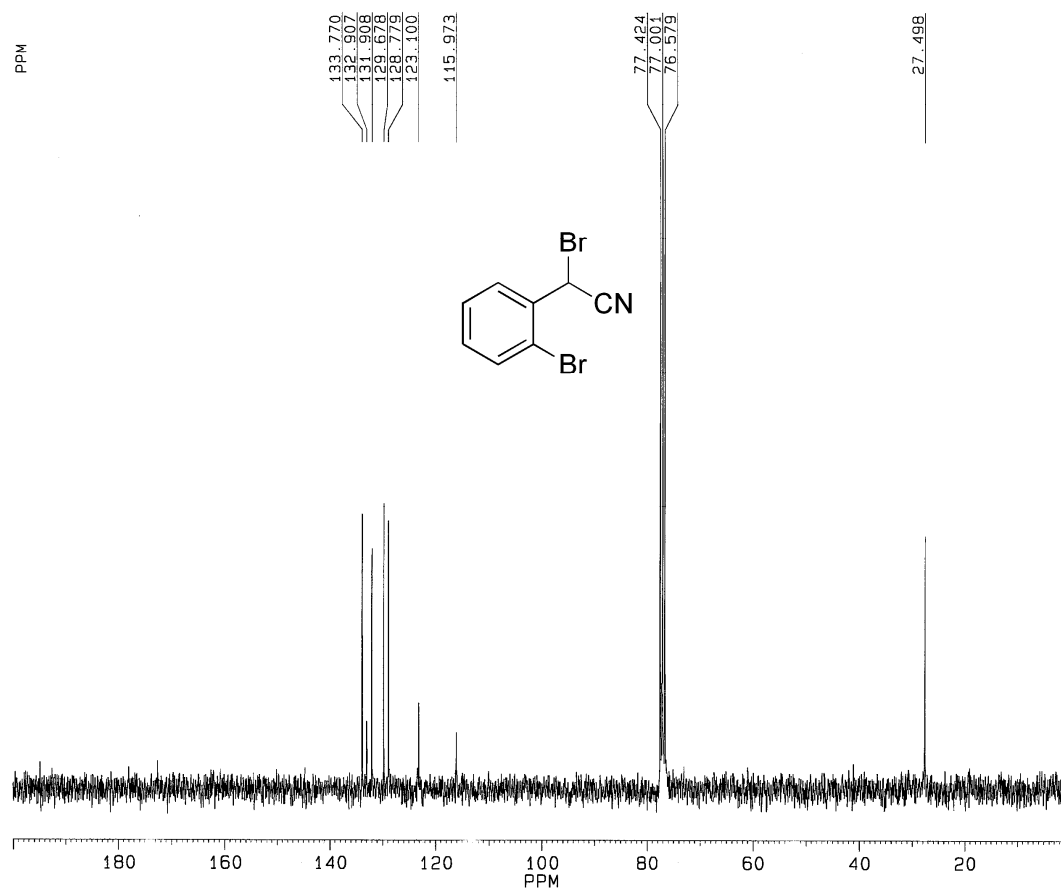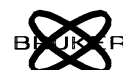

D1121.903  
DATE ??-??-??

SF 75.469  
SY 75.0  
Q1 6517.695  
SI 32768  
TD 32768  
SW 19230.769  
HZ/PT 1.174

PW 1.4  
RD 1.500  
AQ .852  
RG 200  
NS 500  
TE 297

FW 24100  
O2 4869.082  
DP 15H CPD

LB 2.000  
GB 0.0  
CX 21.00  
CY 0.0  
F1 200.008P  
F2 .013P  
HZ/CM 718.728  
PPM/CM 9.524  
SR -1404.97



## 2-(2-Bromophenyl)-2-phenoxyacetonitrile (5o)

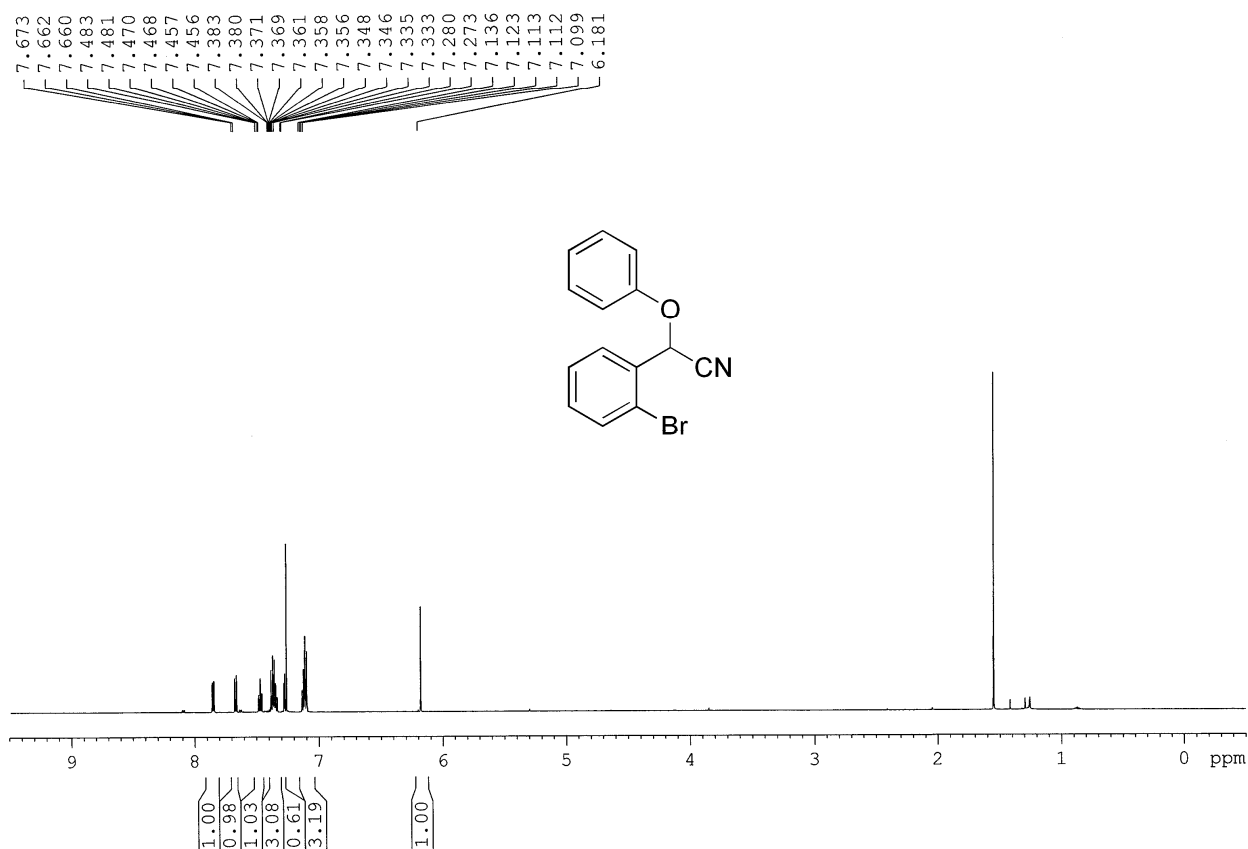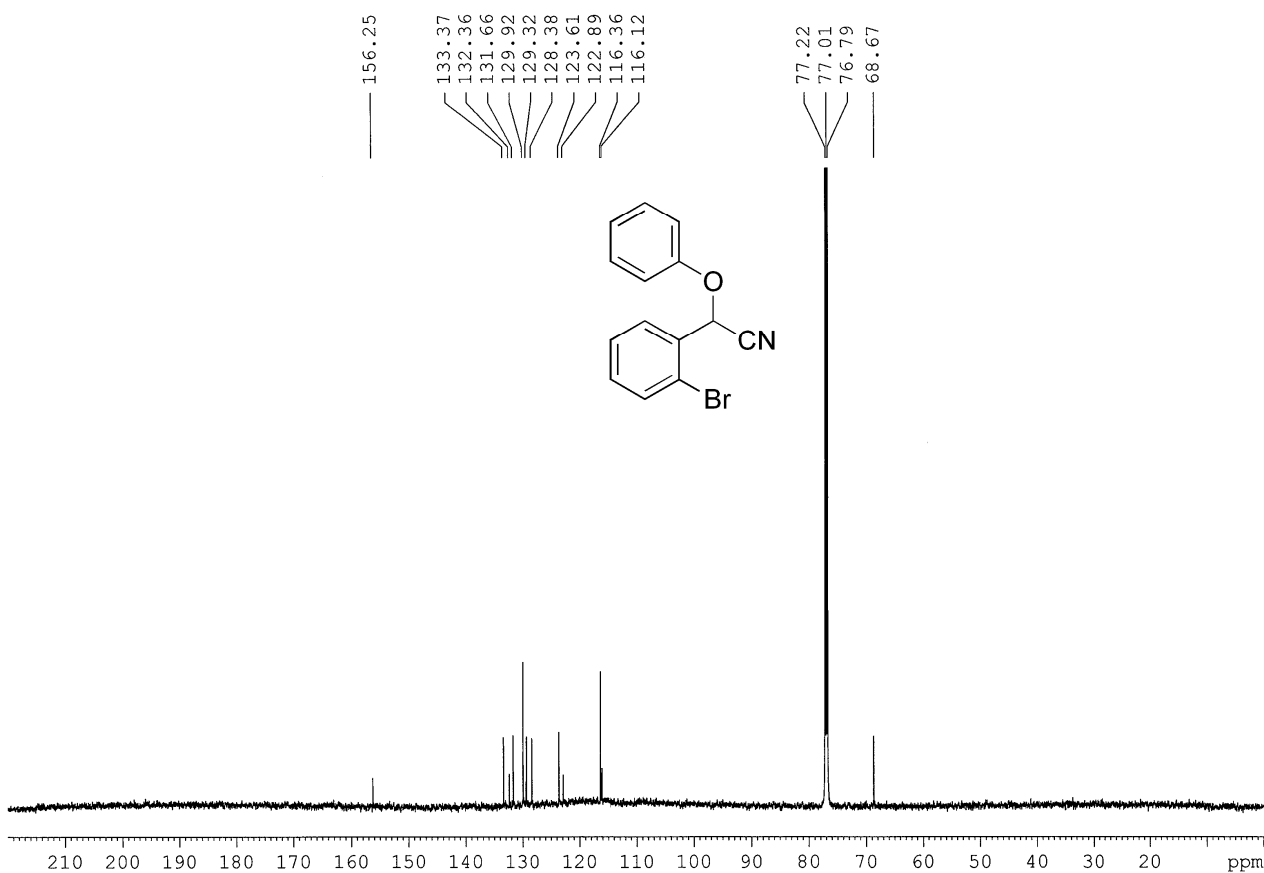

2-(2-Bromophenyl)-2-phenoxybutanenitrile (1o)

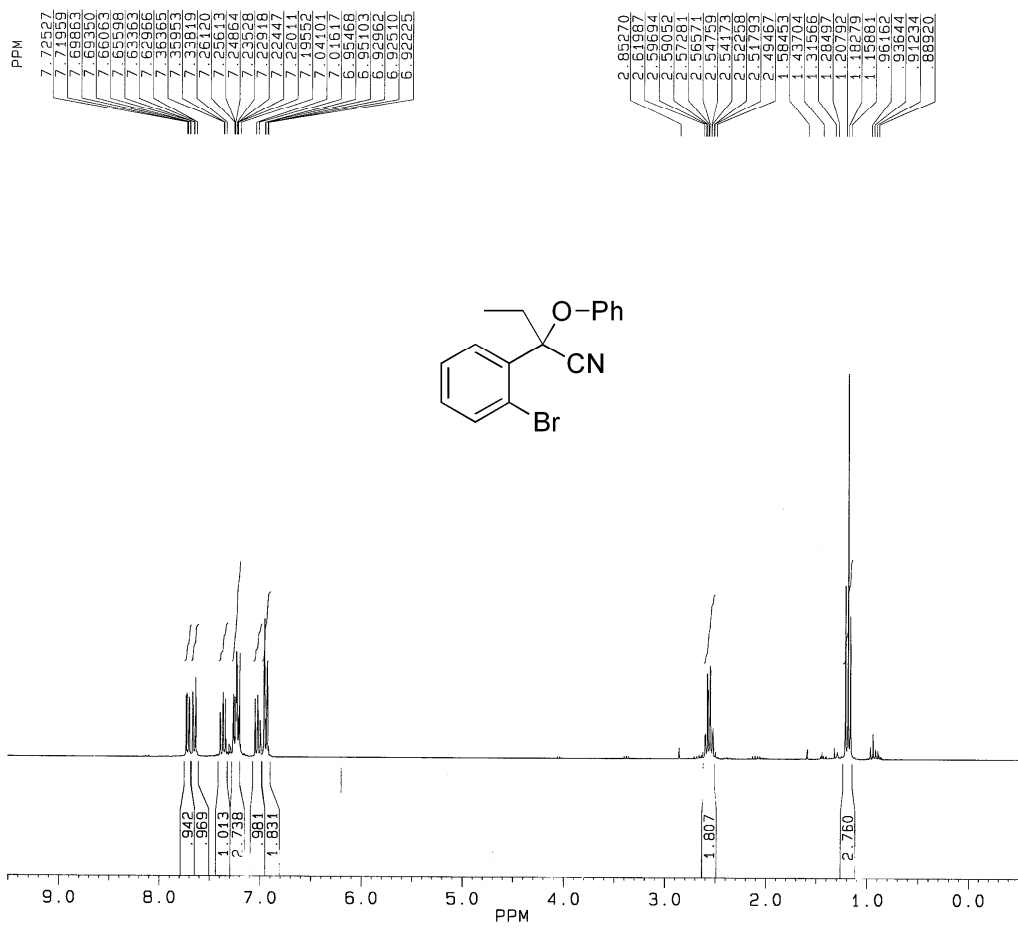

**BRUKER**

D1215.015  
DATE ??-??-??

SF 300.133  
SY 299.0  
O1 5018.332  
SI 16384  
TD 16384  
SW 4807.692  
HZ/PT .587

PW 1.4  
RD 1.000  
AQ 1.704  
RG 20  
NS 35  
TE 297

FW 6100  
O2 0.0  
DP 63L P0

LB 0.0  
GB 0.0  
CX 21.00  
CY 0.0  
F1 9.501P  
F2 -.499P  
HZ/CM 142.918  
PPM/CM .476  
SR 3367.55

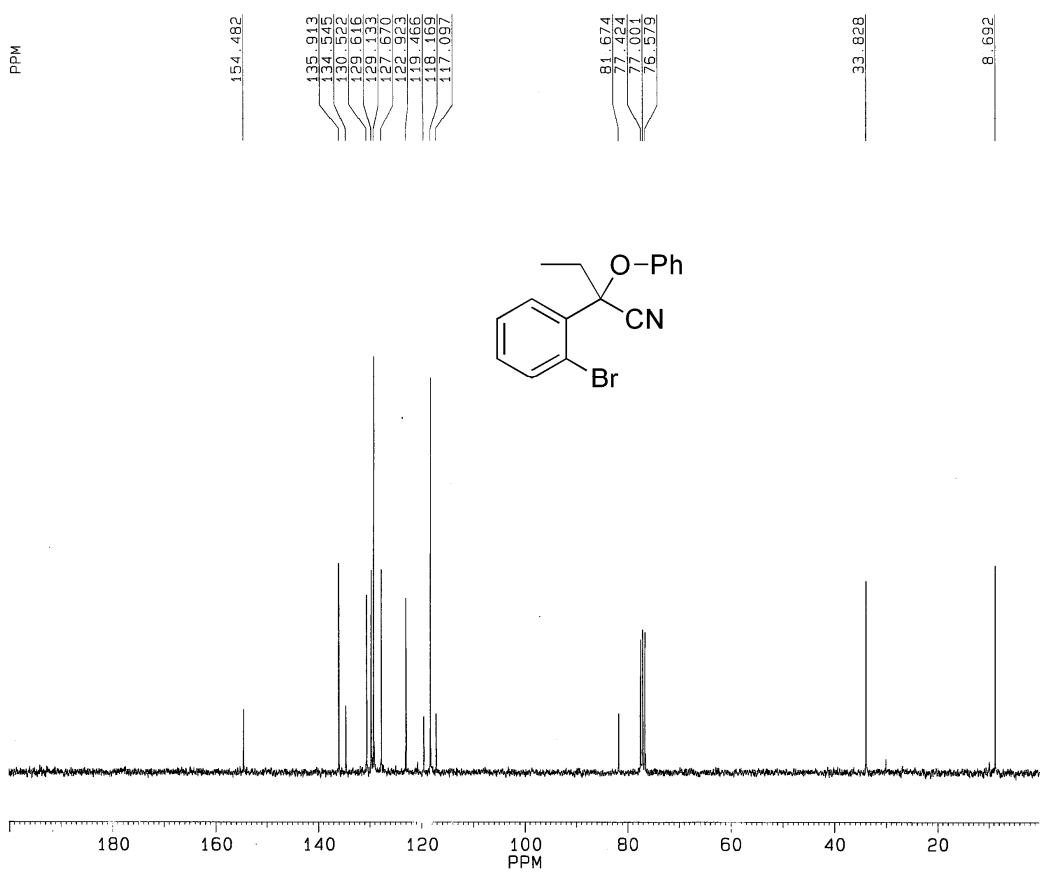

**BRUKER**

D1215.905  
DATE ??-??-??

SF 75.469  
SY 75.0  
O1 6517.695  
SI 32768  
TD 32768  
SW 19230.769  
HZ/PT 1.174

PW 1.4  
RD 1.500  
AQ .852  
RG 160  
NS 250  
TE 297

FW 24100  
O2 4869.082  
DP 15H CPD

LB 2.000  
GB 0.0  
CX 21.00  
CY 0.0  
F1 200.008P  
F2 .013P  
HZ/CM 718.728  
PPM/CM 9.524  
SR -1400.27

# 2-(2-Bromophenyl)-2-(phenylthio)acetonitrile (5p)

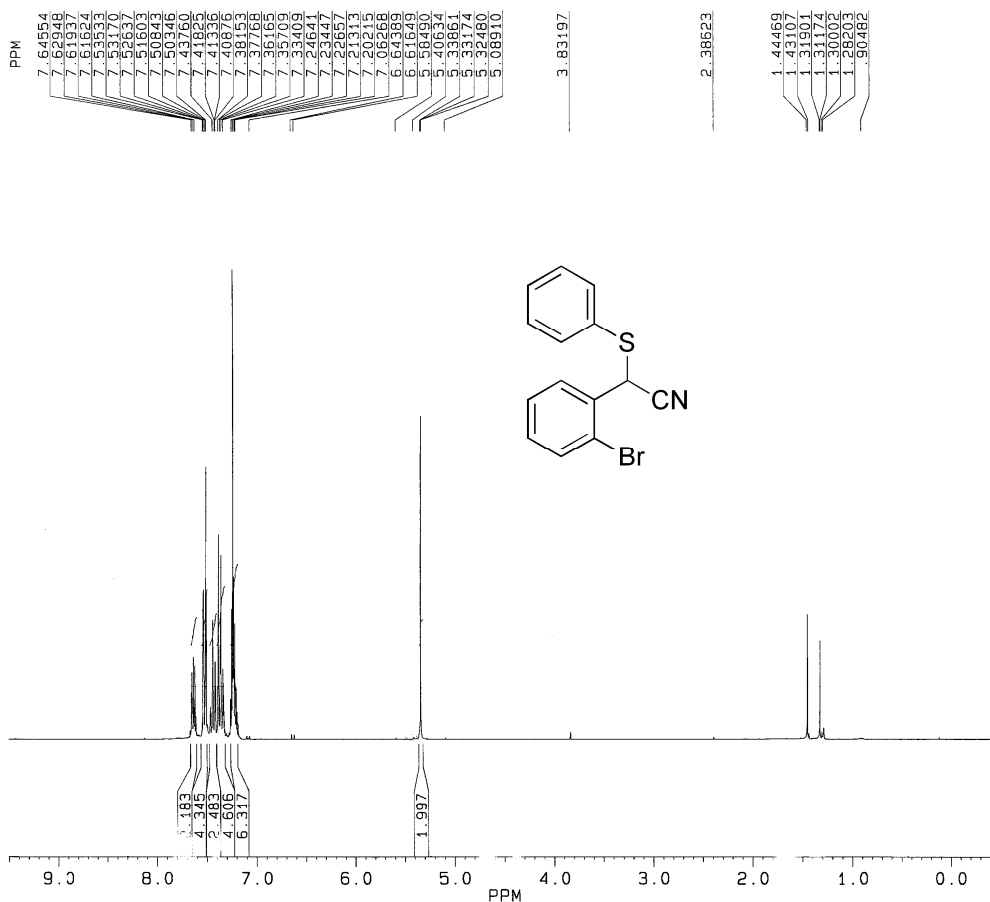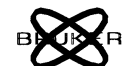

D1209.008  
DATE ??-??-??  
SF 300.133  
SY 299.0  
O1 5018.332  
SI 16384  
TD 16384  
SW 4807.692  
HZ/PT .587  
PW 1.4  
RD 1.000  
AQ 1.704  
RG 20  
NS 32  
TE 297  
FW 6100  
O2 0.0  
DP 63L P0  
LB 0.0  
GB 0.0  
CX 21.00  
CY 0.0  
F1 9.501P  
F2 -.499P  
HZ/CM 142.918  
PPM/CM .476  
SR 3367.55

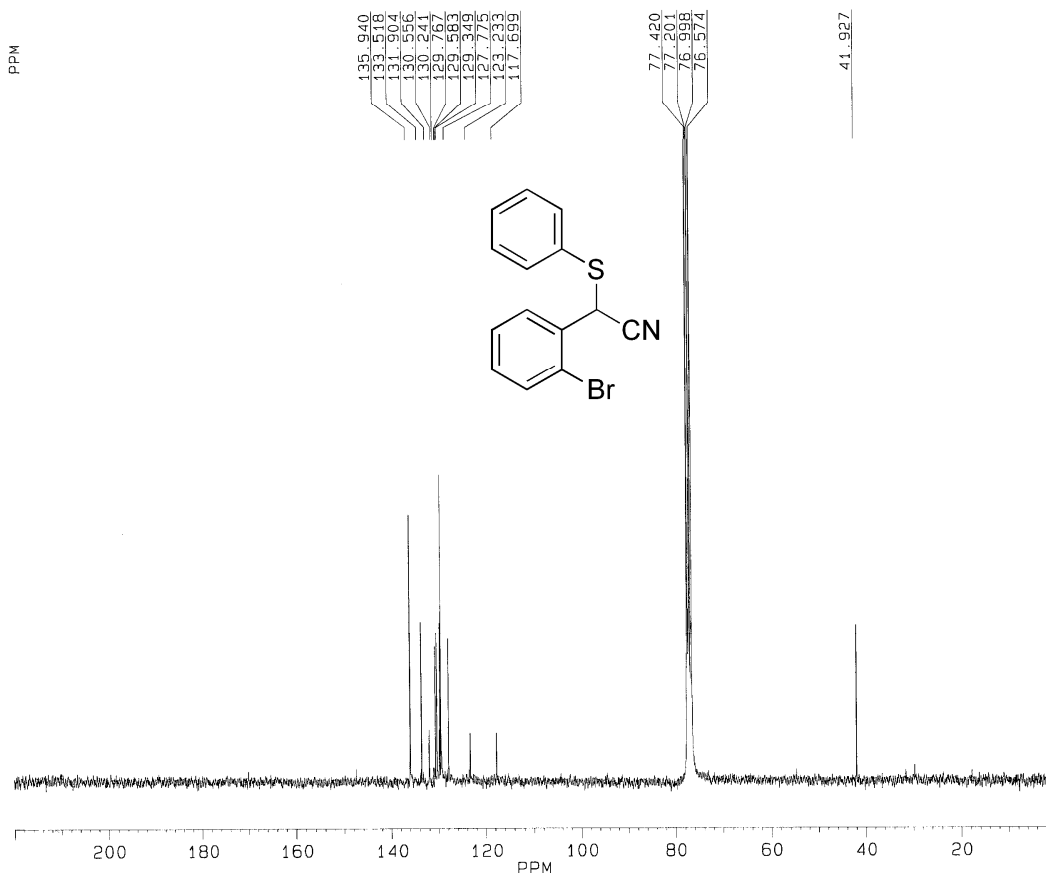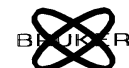

D0209.901  
DATE ??-??-??  
SF 75.469  
SY 75.0  
O1 6517.695  
SI 32768  
TD 32768  
SW 19230.769  
HZ/PT 1.174  
PW 1.4  
RD 1.500  
AQ .852  
RG 200  
NS 21336  
TE 297  
FW 24100  
O2 4869.082  
DP 15H CPD  
LB 2.000  
GB 0.0  
CX 21.00  
CY 0.0  
F1 220.009P  
F2 .013P  
HZ/CM 790.606  
PPM/CM 10.476  
SR -1404.97

# 2-(2-Bromophenyl)-2-(phenylthio)butanenitrile (1p)

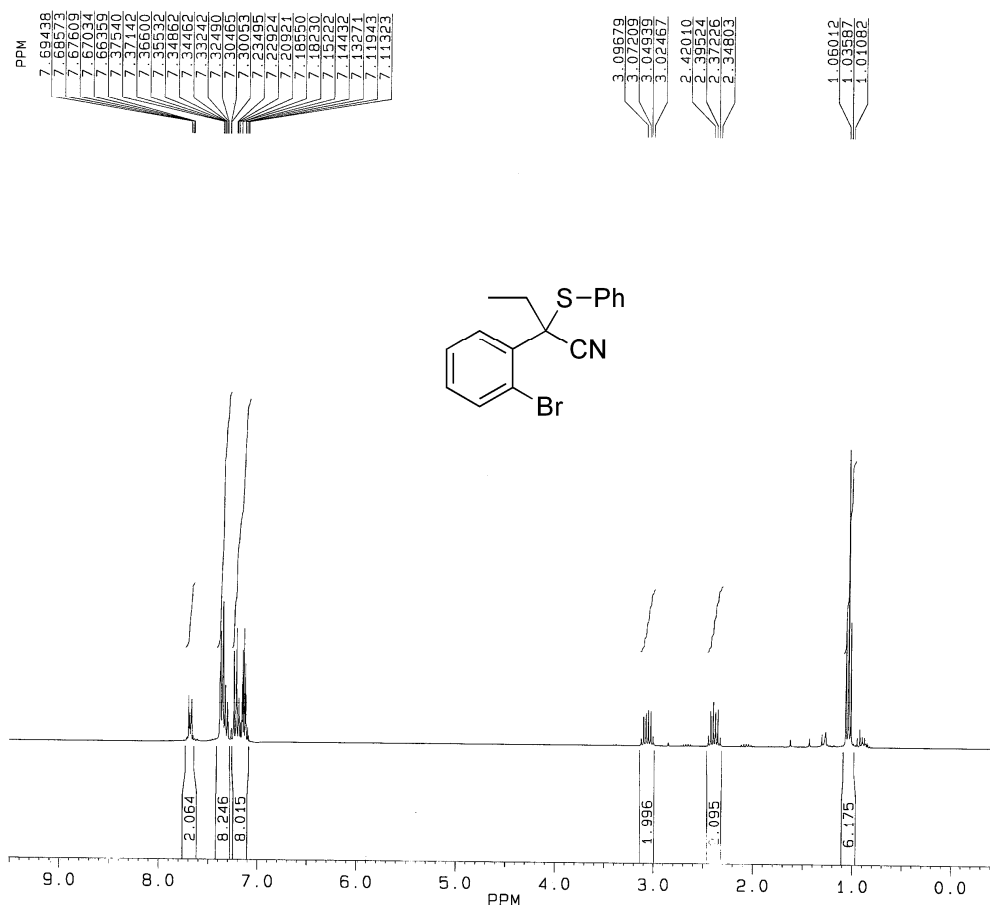

~~BLANK~~

D1224.016  
DATE ??-??-??

SF 300.133  
SY 299.0  
Q1 5018.332  
SI 16384  
TD 16384  
SW 4807.692  
HZ/PT .587

PW 1.4  
RD 1.000  
AQ 1.704  
RG 20  
NS 32  
TE 297

FW 6100  
O2 0.0  
DP 63L P0

LB 0.0  
GB 0.0  
CX 21.00  
CY 0.0  
F1 9.501P  
F2 -.499P  
HZ/CM 142.918  
PPM/CM .476  
SR 3367.00

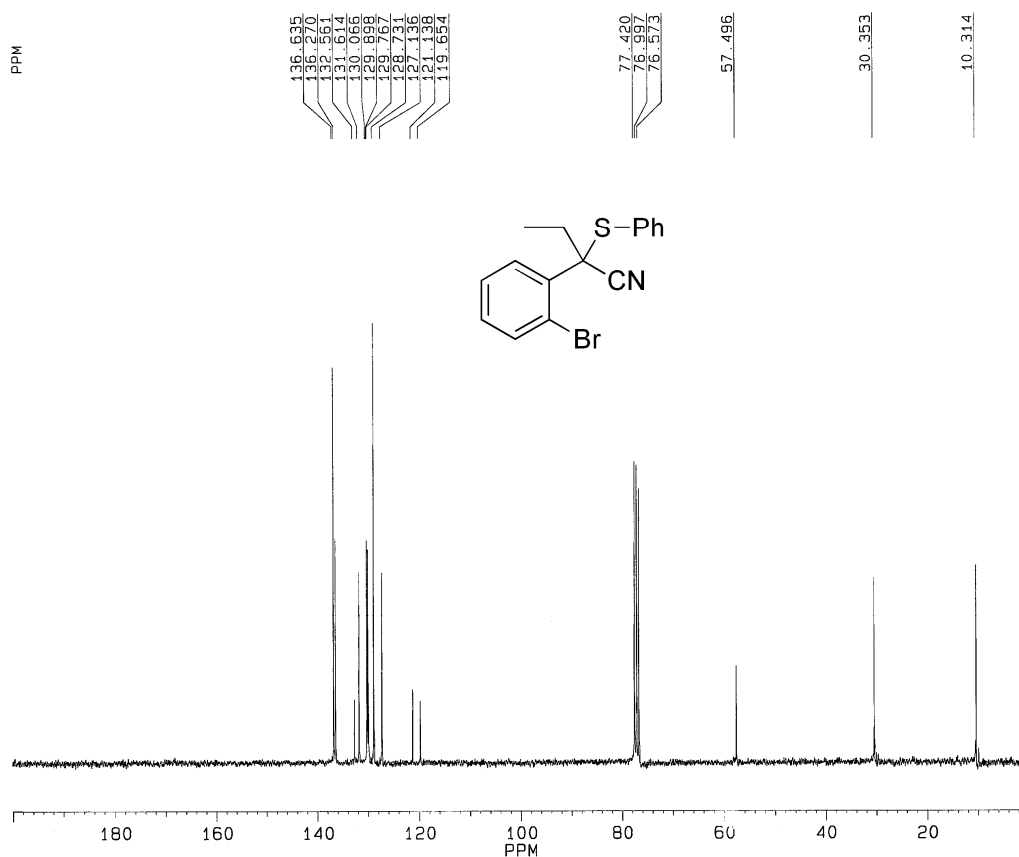

~~BLANK~~

D1224.902  
DATE ??-??-??

SF 75.469  
SY 75.0  
Q1 6517.695  
SI 32768  
TD 32768  
SW 19230.769  
HZ/PT 1.174

PW 1.4  
RD 1.500  
AQ .852  
RG 200  
NS 474  
TE 297

FW 24100  
O2 4869.082  
DP 15H CPD

LB 2.000  
GB 0.0  
CX 21.00  
CY 0.0  
F1 200.008P  
F2 .013P  
HZ/CM 718.728  
PPM/CM 9.524  
SR -1399.10

# 2-(2-Bromophenyl)-2-(phenylthio)butanenitrile (1q)

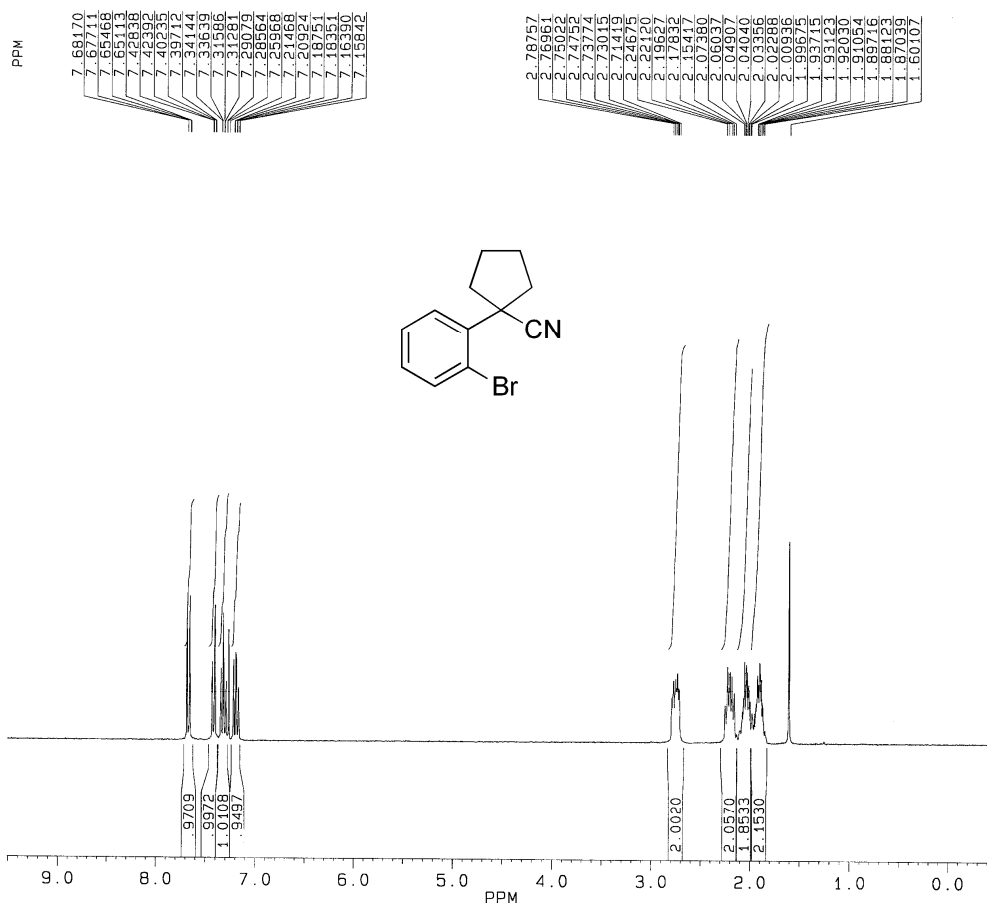

~~BRUKER~~

D0718.002  
DATE ??-??-??

SF 300.133  
SY 299.0  
O1 5018.332  
SI 16384  
TD 16384  
SW 4807.692  
HZ/PT .587

PW 1.4  
RD 1.000  
AQ 1.704  
RG 160  
NS 32  
TE 297

FW 6100  
O2 0.0  
DP 63L P0  
LB 0.0  
GB 0.0  
CX 21.00  
CY 0.0  
F1 9.501P  
F2 -.499P  
HZ/CM 142.918  
PPM/CM .476  
SR 3367.55

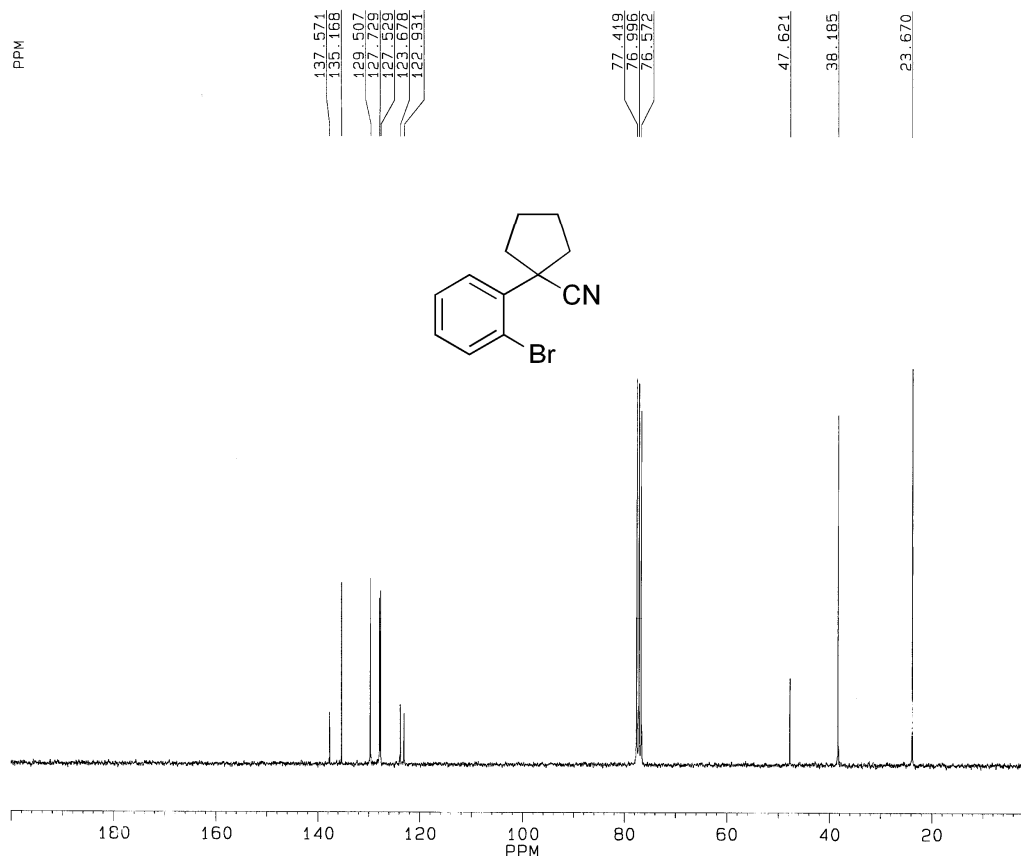

~~BRUKER~~

D0709.901  
DATE ??-??-??

SF 75.469  
SY 75.0  
O1 6517.695  
SI 32768  
TD 32768  
SW 19230.769  
HZ/PT 1.174

PW 1.4  
RD 1.500  
AQ .852  
RG 200  
NS 1141  
TE 297

FW 24100  
O2 4869.082  
DP 15H CPD  
LB 2.000  
GB 0.0  
CX 21.00  
CY 0.0  
F1 200.008P  
F2 .013P  
HZ/CM 718.728  
PPM/CM 9.524  
SR -1401.45

# 1-(2-Bromophenyl)cyclohexanecarbonitrile (1r)

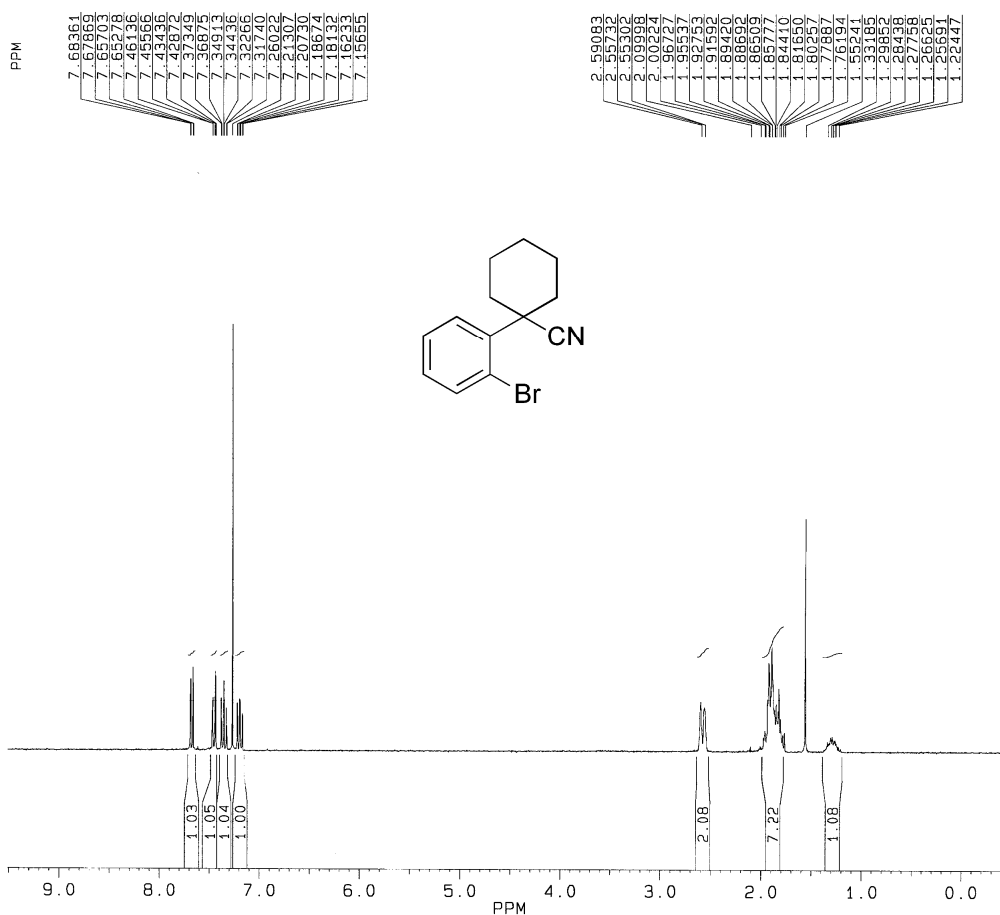

**BLUKER**

D0722.043  
DATE ??-??-??

SF 300.133  
SY 299.0  
O1 5018.332  
SI 16384  
TD 16384  
SW 4807.692  
HZ/PT .587

PW 1.4  
RD 1.000  
AQ 1.704  
RG 40  
NS 64  
TE 297

FW 6100  
O2 0.0  
DP 63L P0  
LB 0.0  
GB 0.0  
CX 21.00  
CY 0.0  
F1 9.501P  
F2 -.499P  
HZ/CM 142.918  
PPM/CM .476  
SR 3366.97

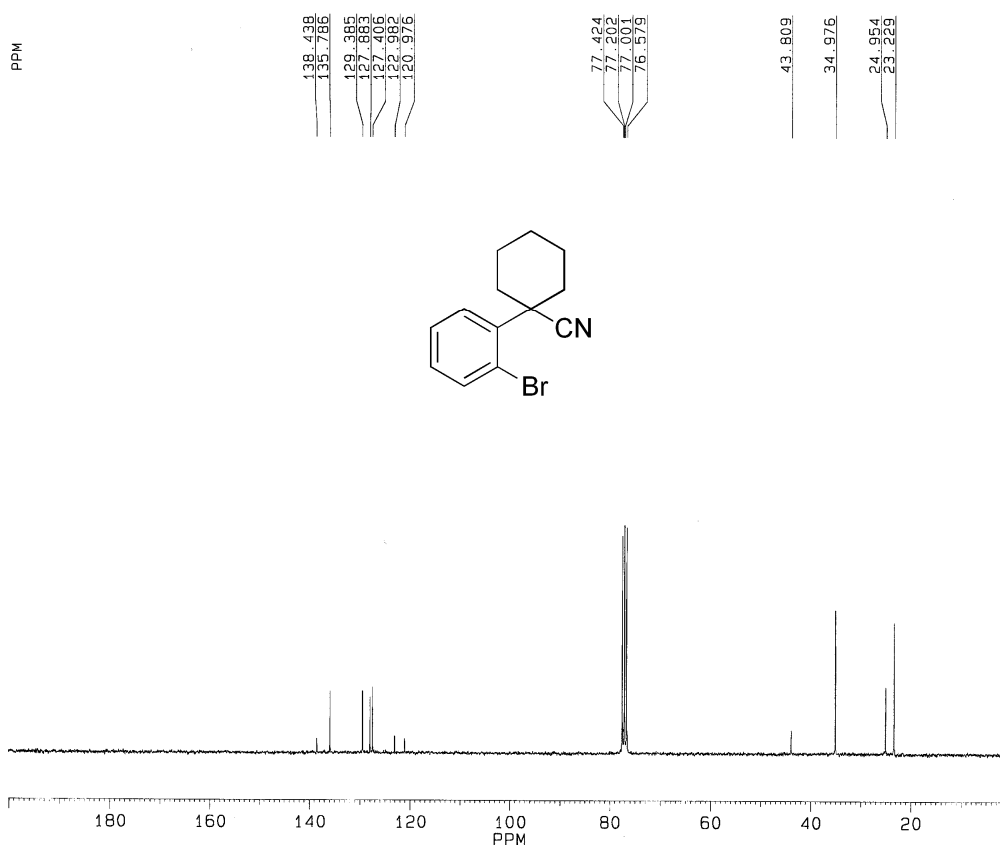

**BLUKER**

D0721.904  
DATE ??-??-??

SF 75.469  
SY 75.0  
O1 6517.695  
SI 32768  
TD 32768  
SW 19230.769  
HZ/PT 1.174

PW 1.4  
RD 1.500  
AQ .852  
RG 200  
NS 2641  
TE 297

FW 24100  
O2 4869.082  
DP 15H CPD  
LB 2.000  
GB 0.0  
CX 21.00  
CY 0.0  
F1 200.008P  
F2 .013P  
HZ/CM 718.728  
PPM/CM 9.524  
SR -1404.97

# 4-(2-Bromophenyl)tetrahydro-2H-pyran-4-carbonitrile (1s)

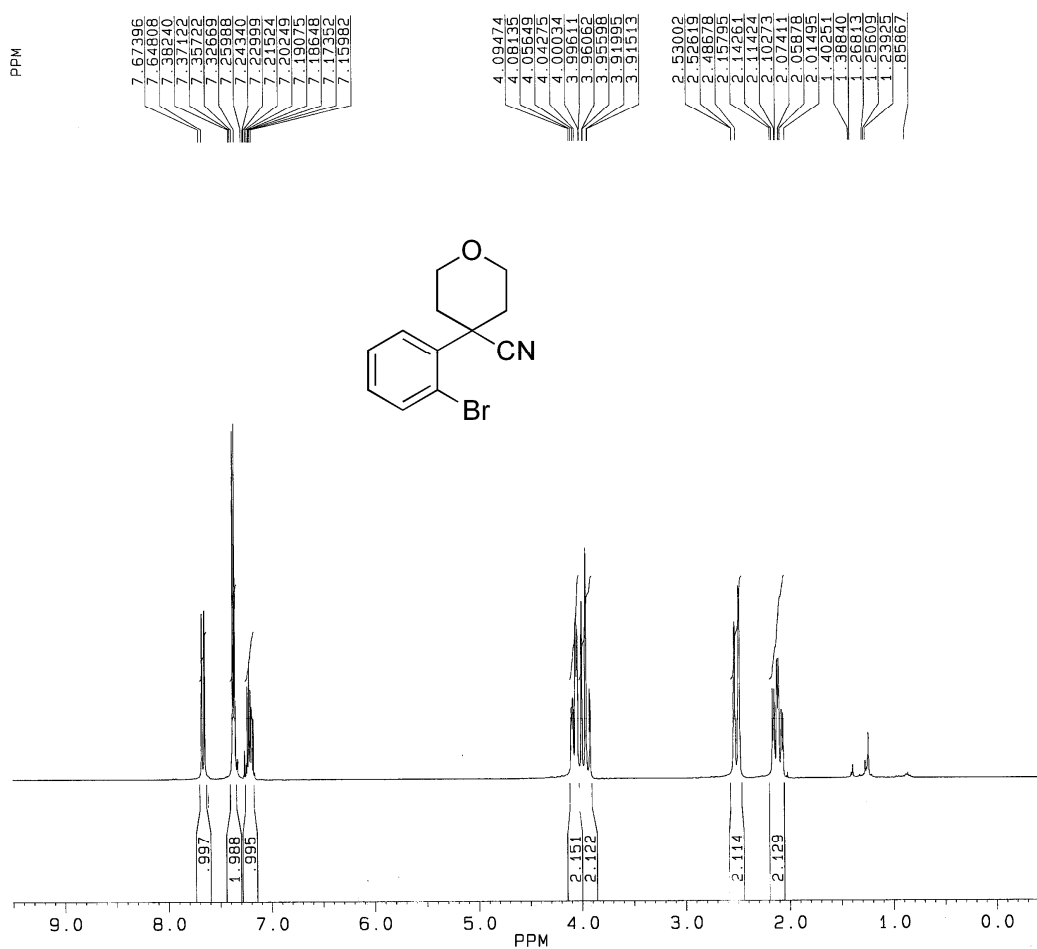

~~BRUKER~~

D1201.005  
DATE ??-??-??

SF 300.133  
SY 299.0  
Q1 5018.332  
SI 16384  
TD 16384  
SW 4807.692  
HZ/PT .587

PW 1.4  
RD 1.000  
AQ 1.704  
RG 16  
NS 32  
TE 297

FW 6100  
Q2 0.0  
DP 63L P0  
LB 0.0  
GB 0.0  
CX 21.00  
CY 0.0  
F1 9.501P  
F2 - .499P  
HZ/CM 142.918  
PPM/CM .476  
SR 3367.55

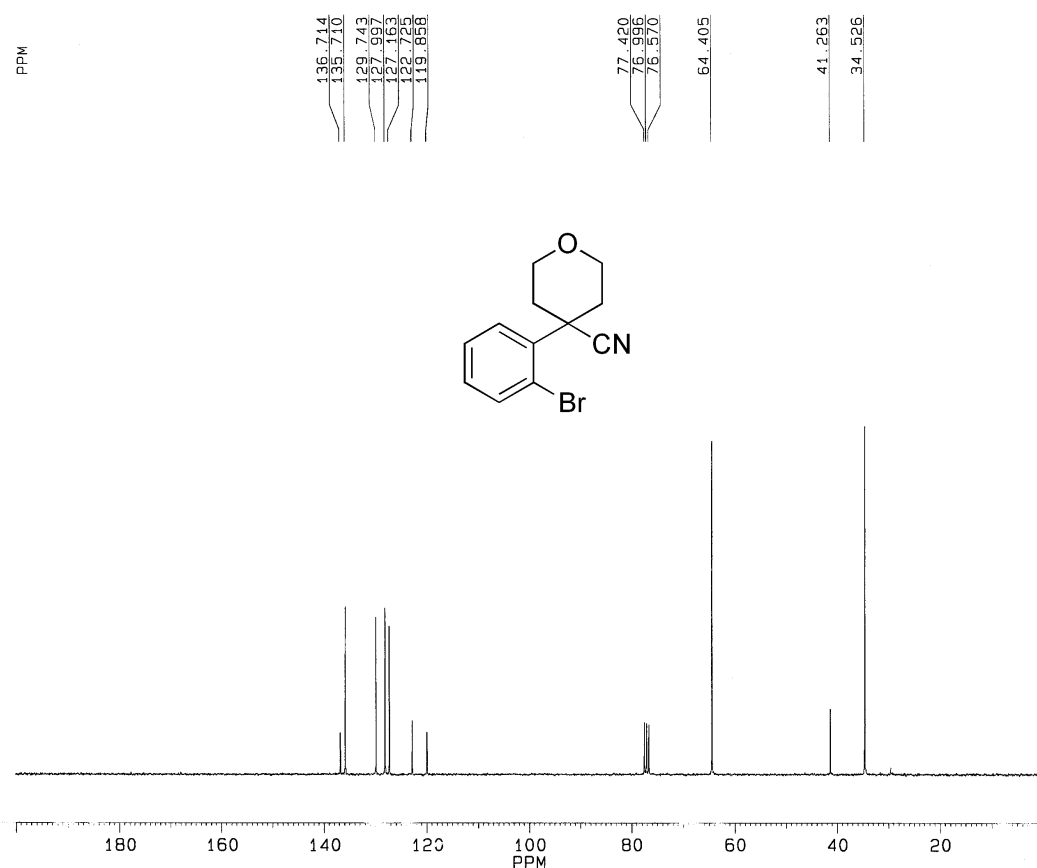

~~BRUKER~~

D1201.902  
DATE ??-??-??

SF 75.469  
SY 75.0  
Q1 6517.695  
SI 32768  
TD 32768  
SW 19230.769  
HZ/PT 1.174

PW 1.4  
RD 1.500  
AQ .852  
RG 160  
NS 410  
TE 297

FW 24100  
Q2 4869.082  
DP 15H CPD  
LB 2.000  
GB 0.0  
CX 21.00  
CY 0.0  
F1 200.008P  
F2 .013P  
HZ/CM 718.728  
PPM/CM 9.524  
SR -1393.23

# Methyl 5-(2-bromophenyl)-5-cyano-2-oxocyclohexanecarboxylate (4t)

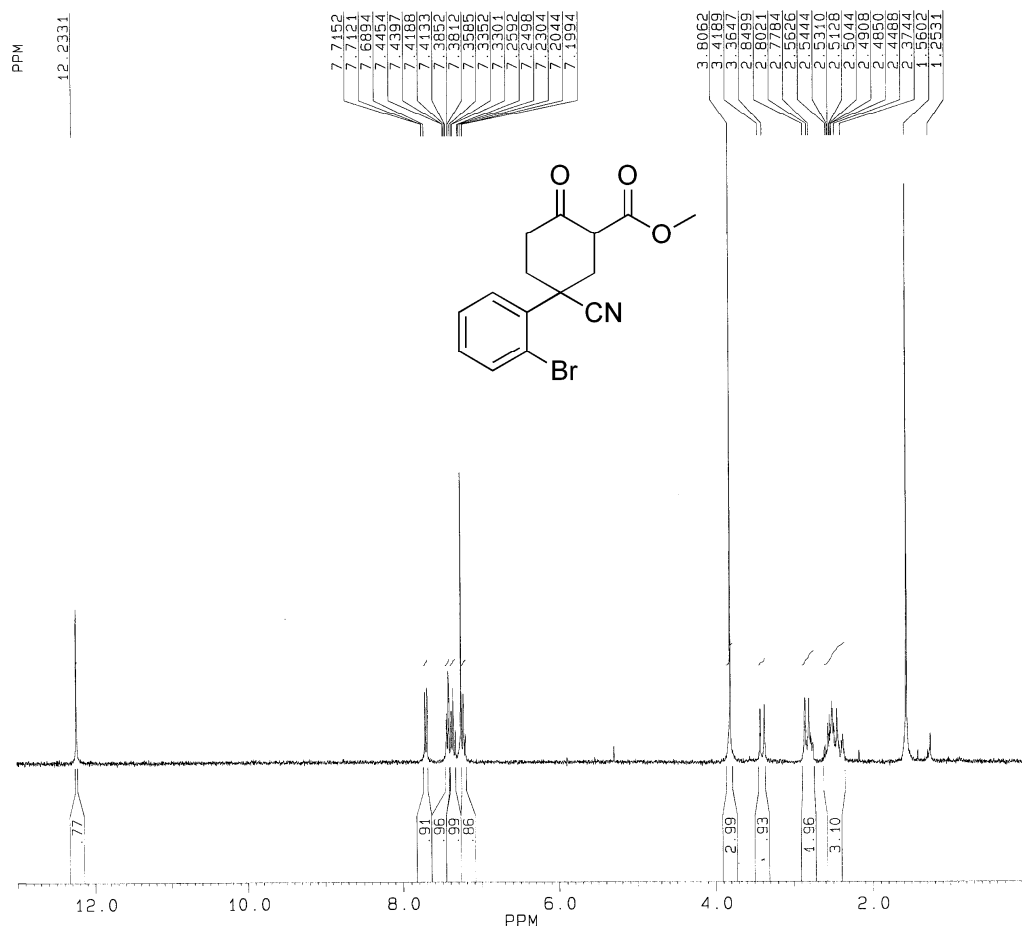

**BRUKER**

D0222.068  
DATE ??-??-??

SF 300.133  
SY 299.0  
O1 5018.332  
SI 16384  
TD 16384  
SW 4807.692  
HZ/PT .587

PW 1.4  
RD 1.000  
AQ 1.704  
RG 320  
NS 32  
TE 297

FW 6100  
O2 0.0  
DP 63L P0  
LB 0.0  
GB 0.0  
CX 21.00  
CY 0.0  
F1 13.001P  
F2 .002P  
HZ/CM 185.788  
PPM/CM .619  
SR 3368.14

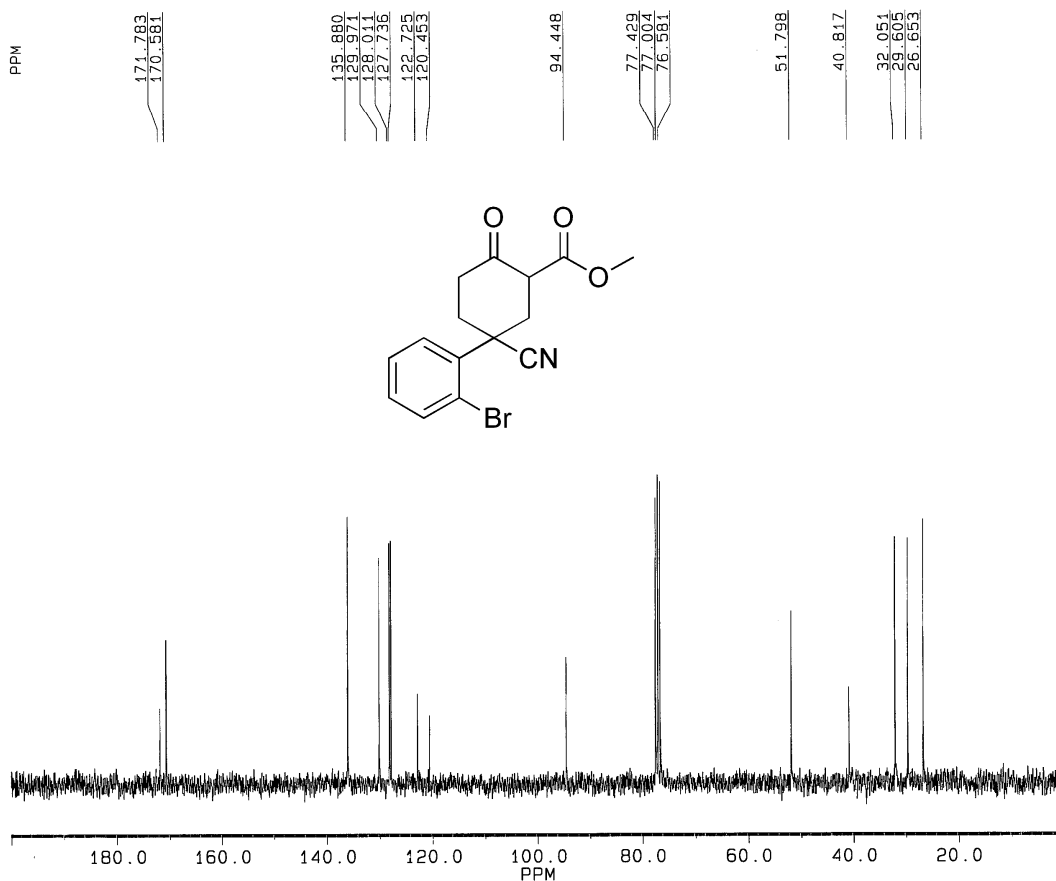

**BRUKER**

C  
DATE ??-??-??

SF 75.469  
SY 75.0  
O1 6517.695  
SI 32768  
TD 32768  
SW 19230.769  
HZ/PT 1.174

PW 1.4  
RD 1.500  
AQ .852  
RG 40  
NS 122  
TE 297

FW 24100  
O2 4869.082  
DP 15H CPD

LB 2.000  
GB 0.0  
CX 21.00  
CY 0.0  
F1 200.008P  
F2 .013P  
HZ/CM 718.728  
PPM/CM 9.524  
SR -1401.45



# 1-(2-Bromophenyl)-4-oxocyclohexanecarbonitrile (5t)

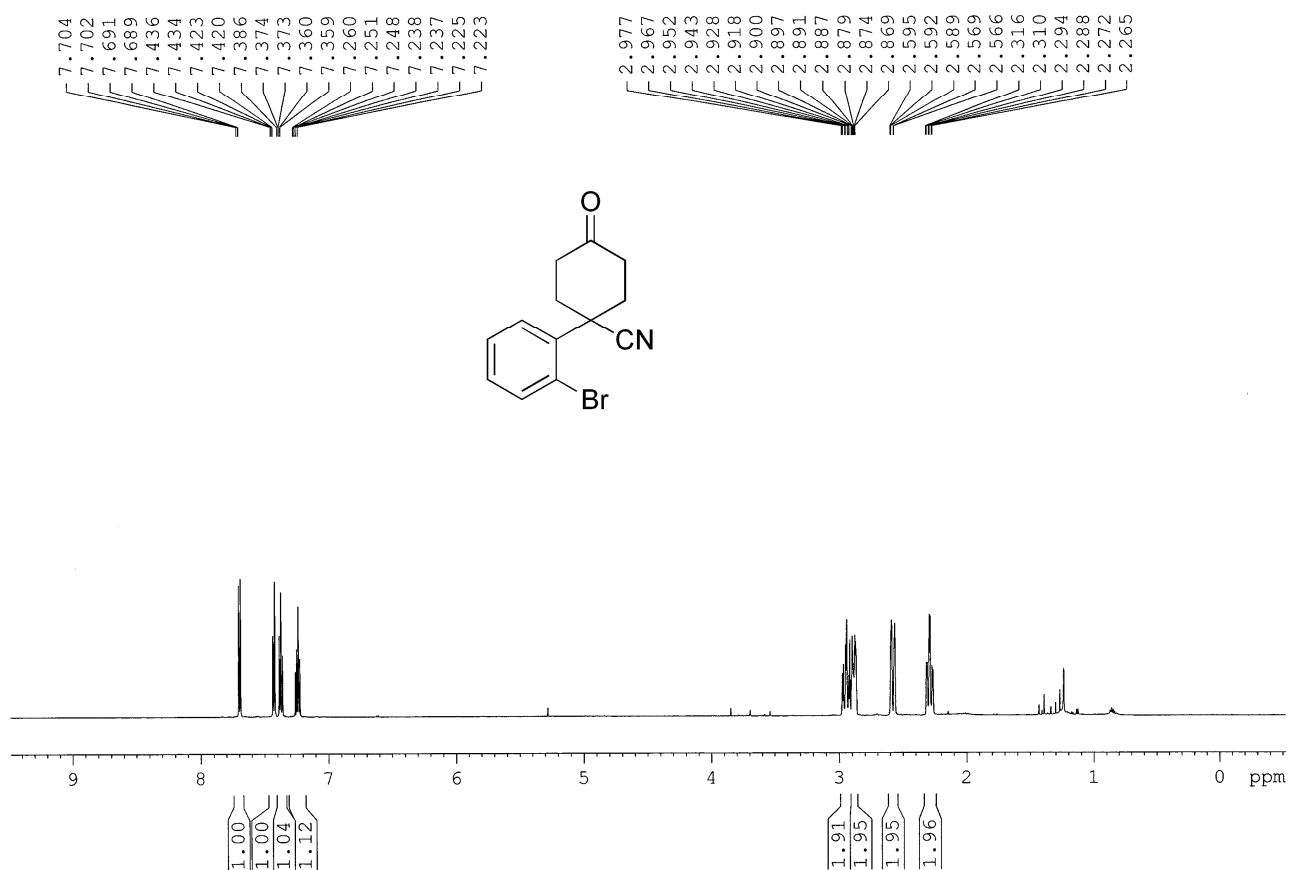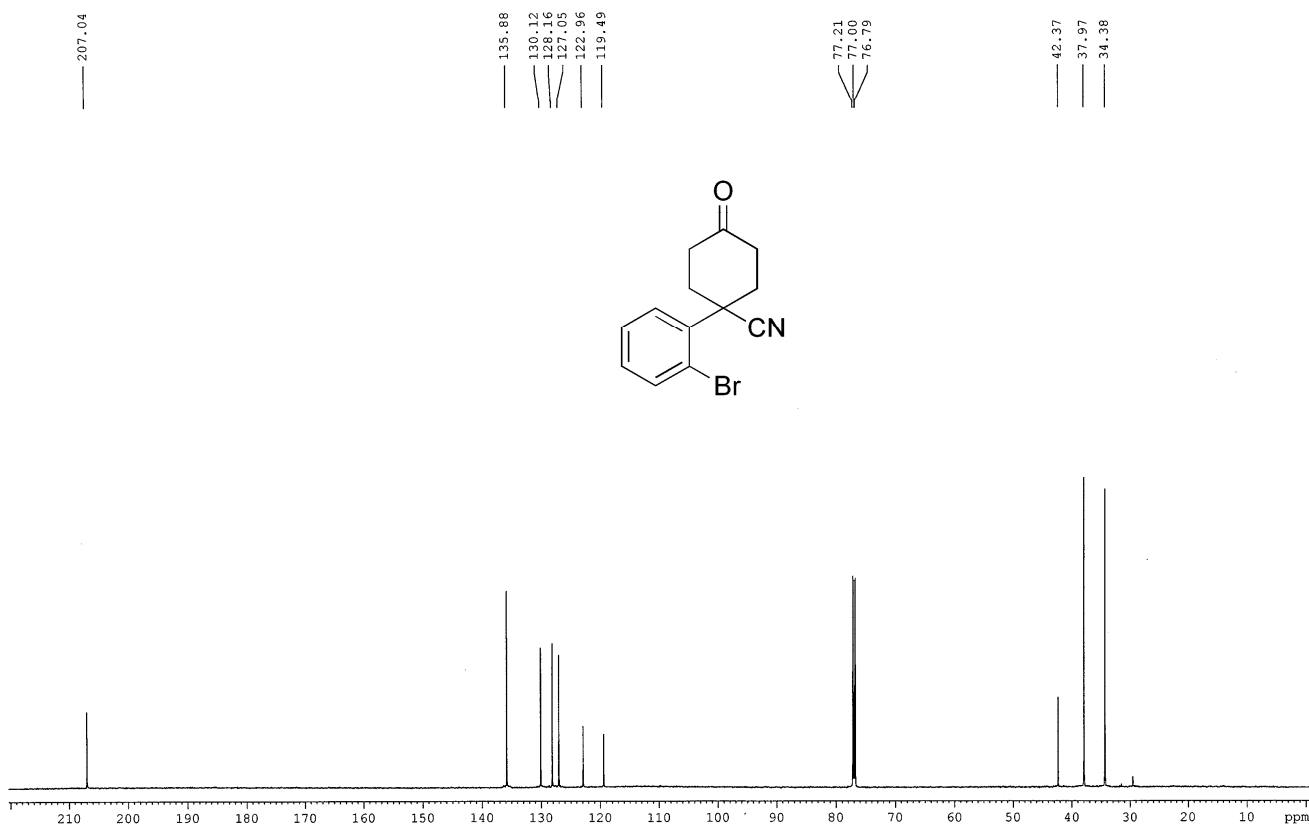

**8-(2-Bromophenyl)-1,4-dioxaspiro[4.5]decane-8-carbonitrile (1t)**

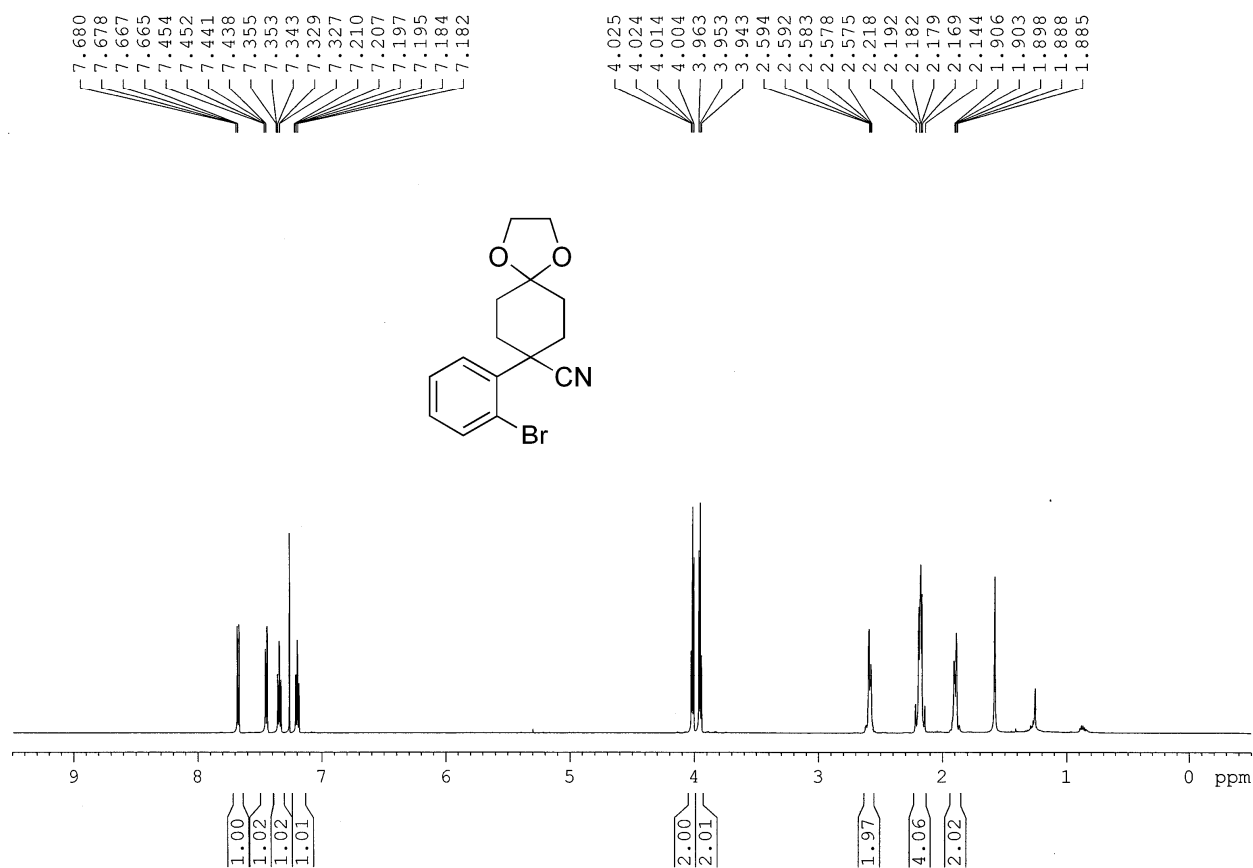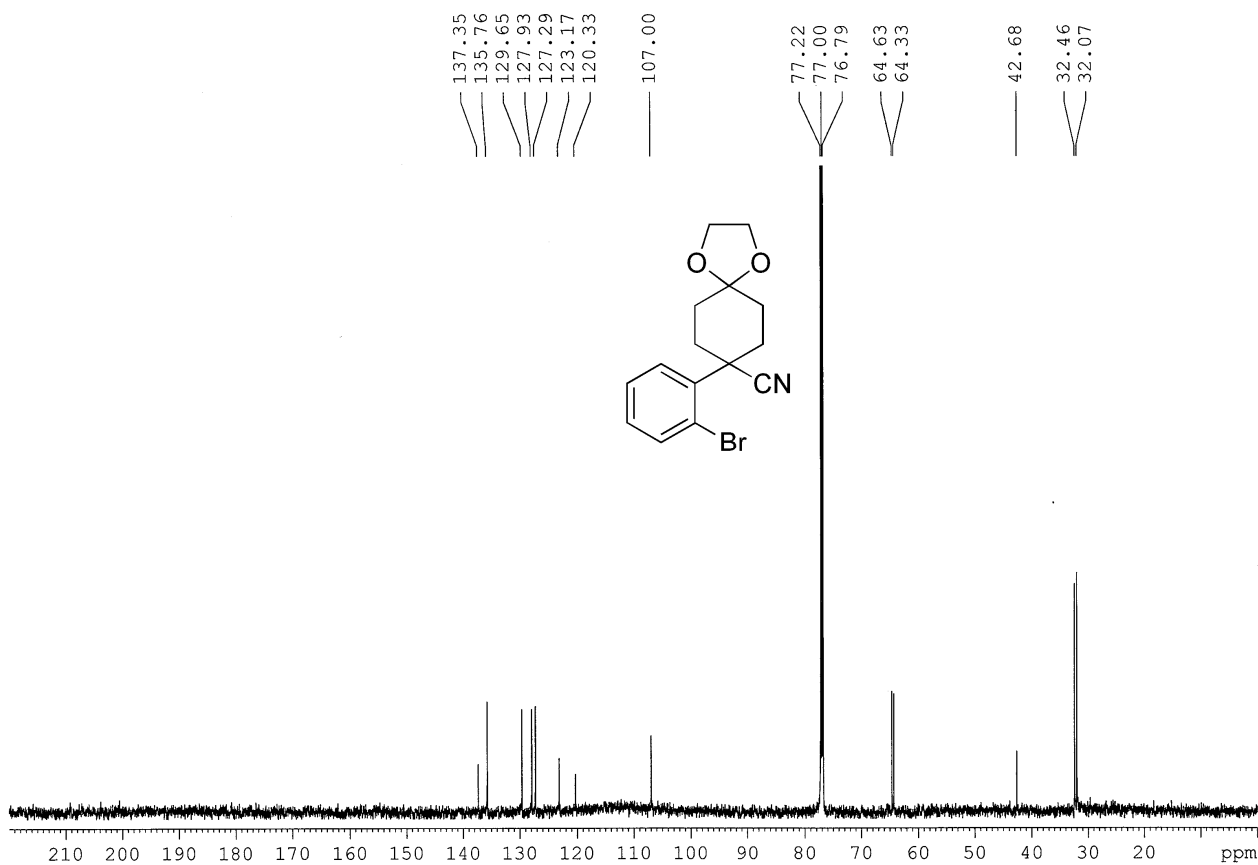

**2-(2-Bromophenyl)-2,3-dihydro-1H-indene-2-carbonitrile (1u)**

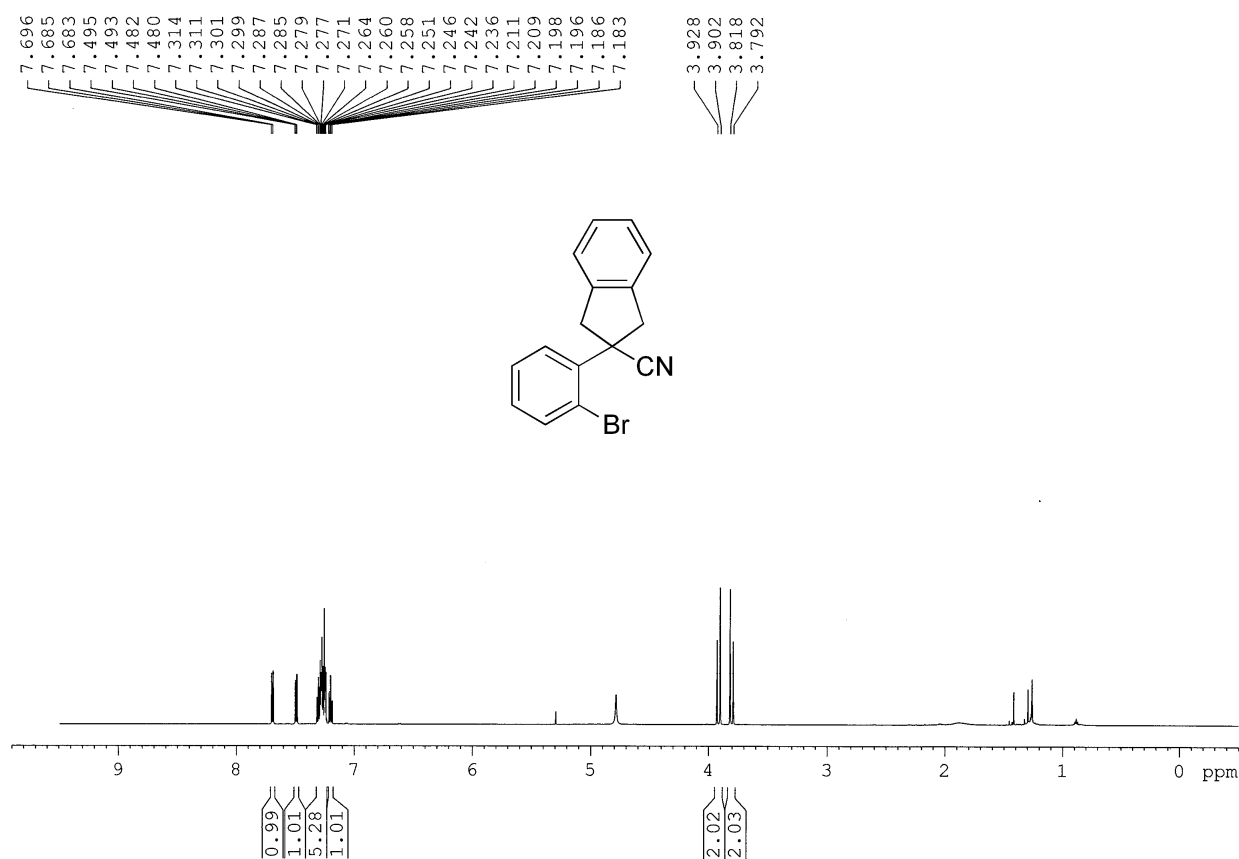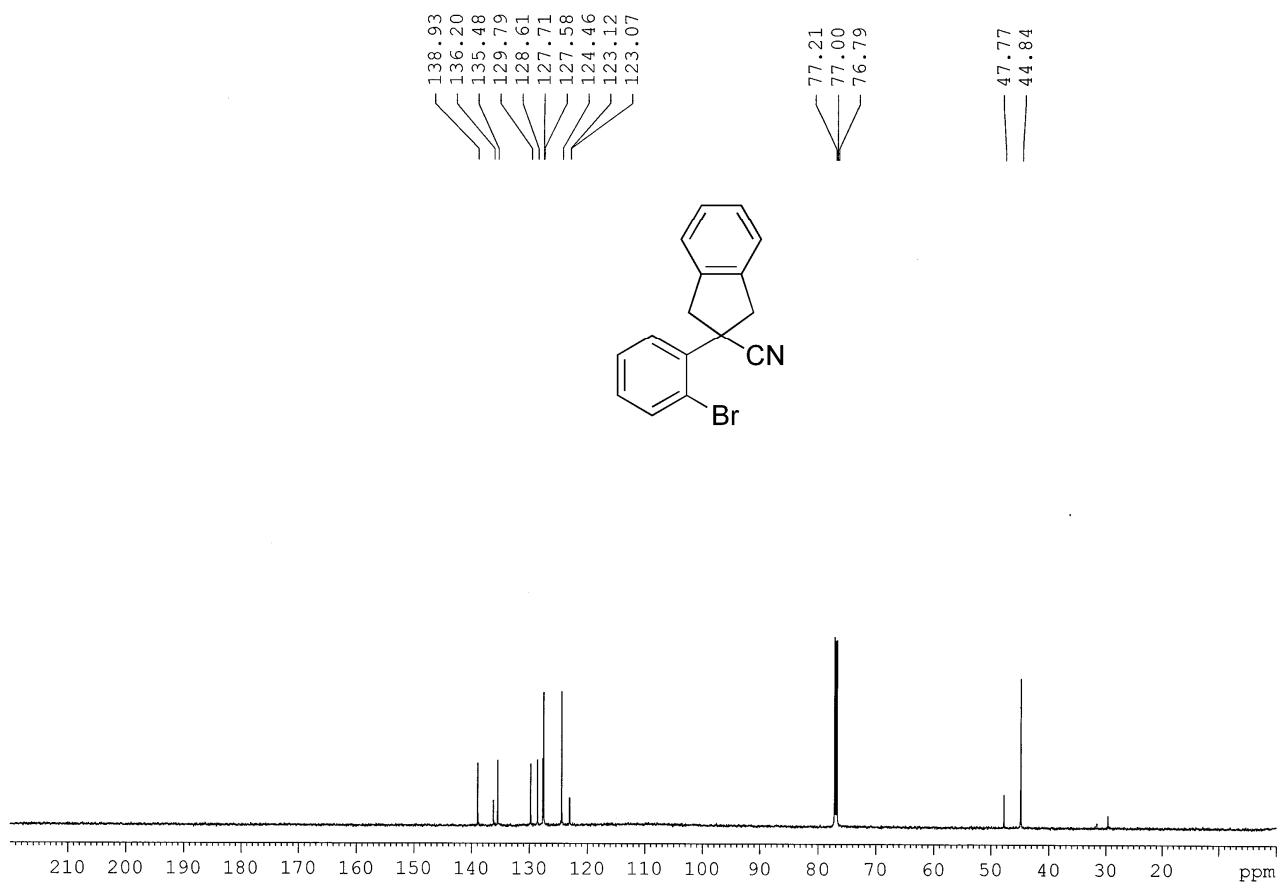

**2-(2-Bromophenyl)-2-cyclohexylideneacetonitrile (1v)**

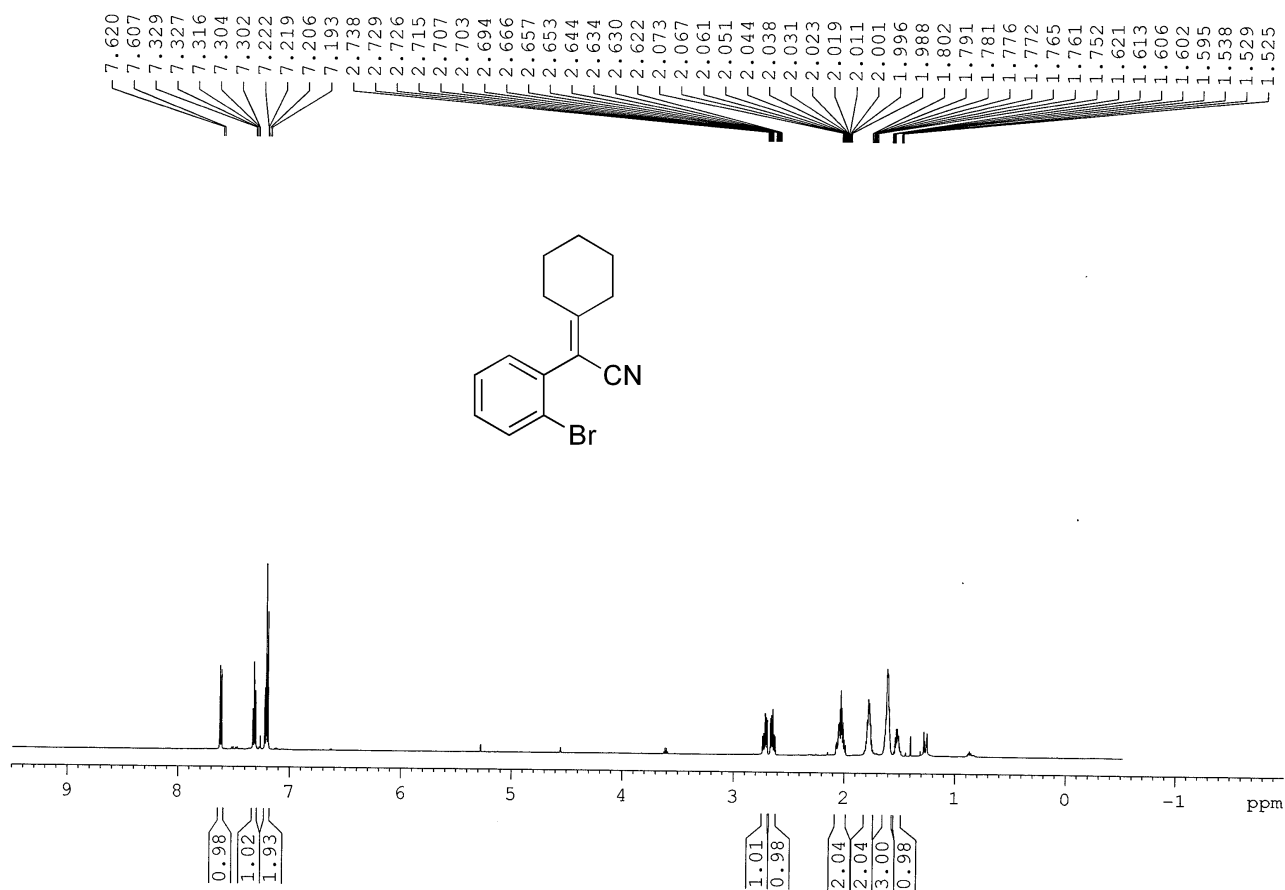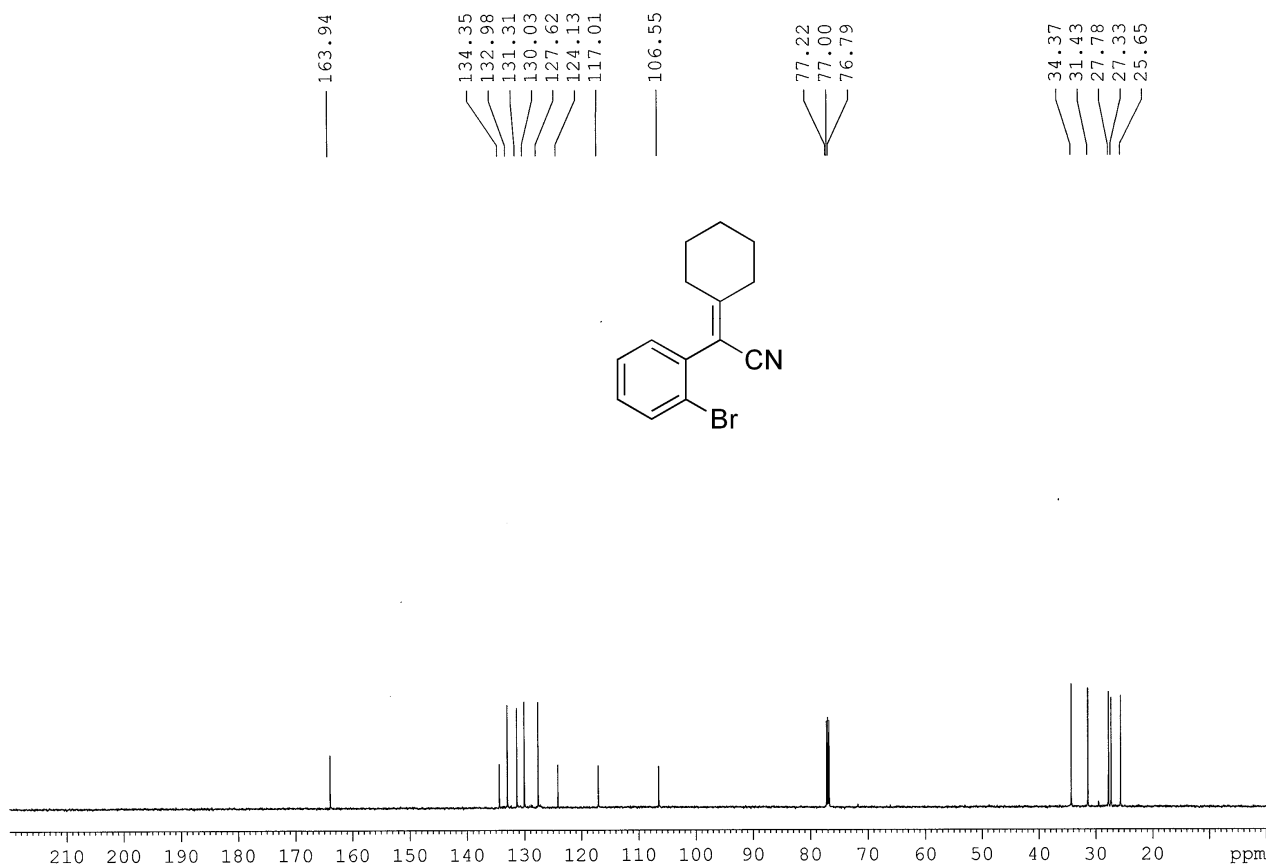

### 3-(2-Bromophenyl)-2,2-dimethylpropanenitrile (1w)

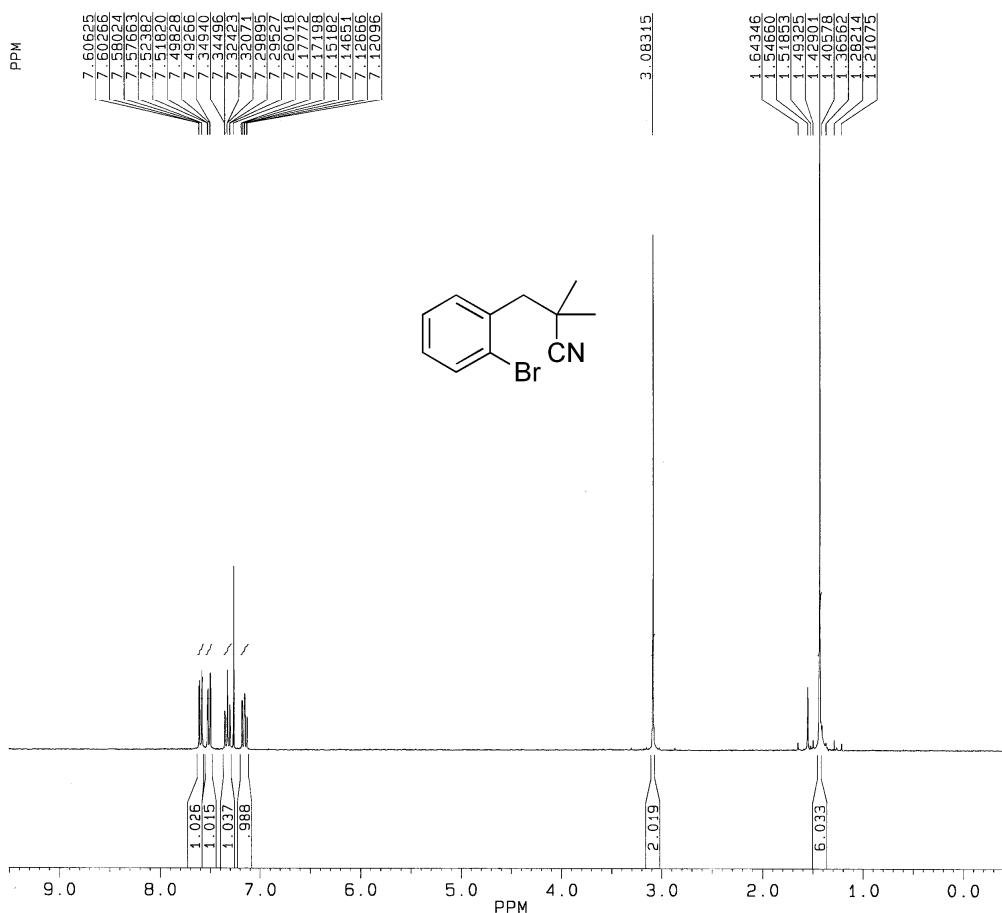

~~BRUKER~~

D1020.009  
DATE ??-??-??

SF 300.133  
SY 299.0  
Q1 5018.332  
SI 16384  
TD 16384  
SW 4807.692  
HZ/PT .587

PW 1.4  
RD 1.000  
AQ 1.704  
RG 160  
NS 32  
TE 297

FW 6100  
Q2 0.0  
DP 63L P0  
LB 0.0  
GB 0.0  
CX 21.00  
CY 0.0  
F1 9.501P  
F2 .499P  
HZ/CM 142.918  
PPM/CM .476  
SR 3367.55

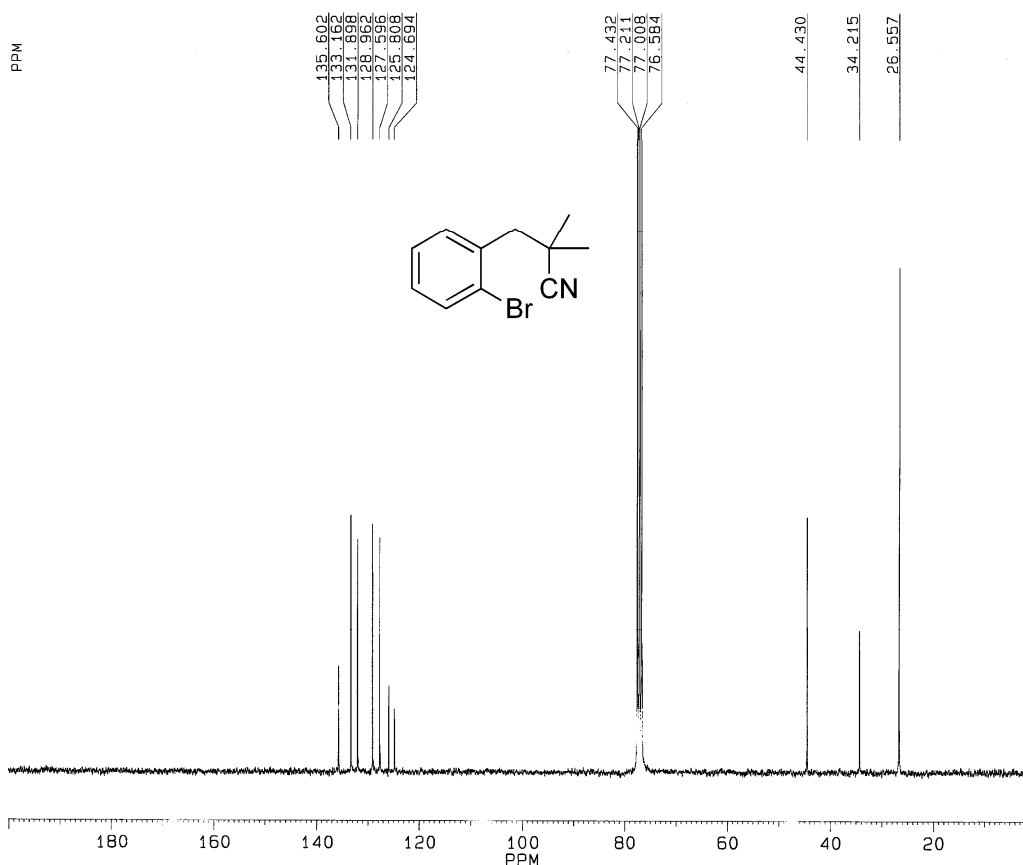

~~BRUKER~~

D1021.901  
DATE ??-??-??

SF 75.469  
SY 75.0  
Q1 6517.695  
SI 32768  
TD 32768  
SW 19230.769  
HZ/PT 1.174

PW 1.4  
RD 1.500  
AQ .852  
RG 200  
NS 8197  
TE 297

FW 24100  
Q2 4869.082  
DP 15H CPD  
LB 2.000  
GB 0.0  
CX 21.00  
CY 0.0  
F1 200.008P  
F2 .013P  
HZ/CM 718.728  
PPM/CM 9.524  
SR -1404.97

**1-(2-Bromo-6-chlorophenyl)cyclopentanecarbonitrile (1A)**

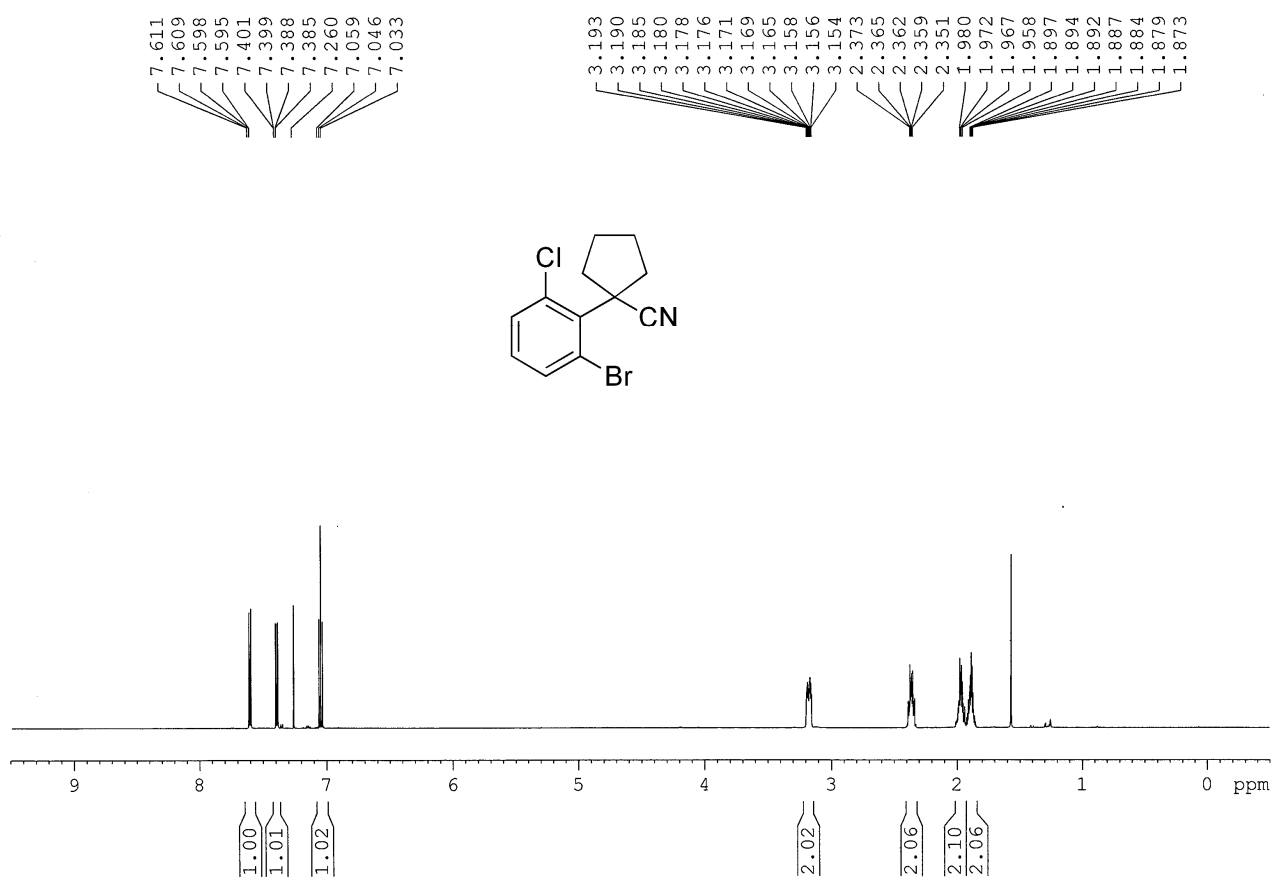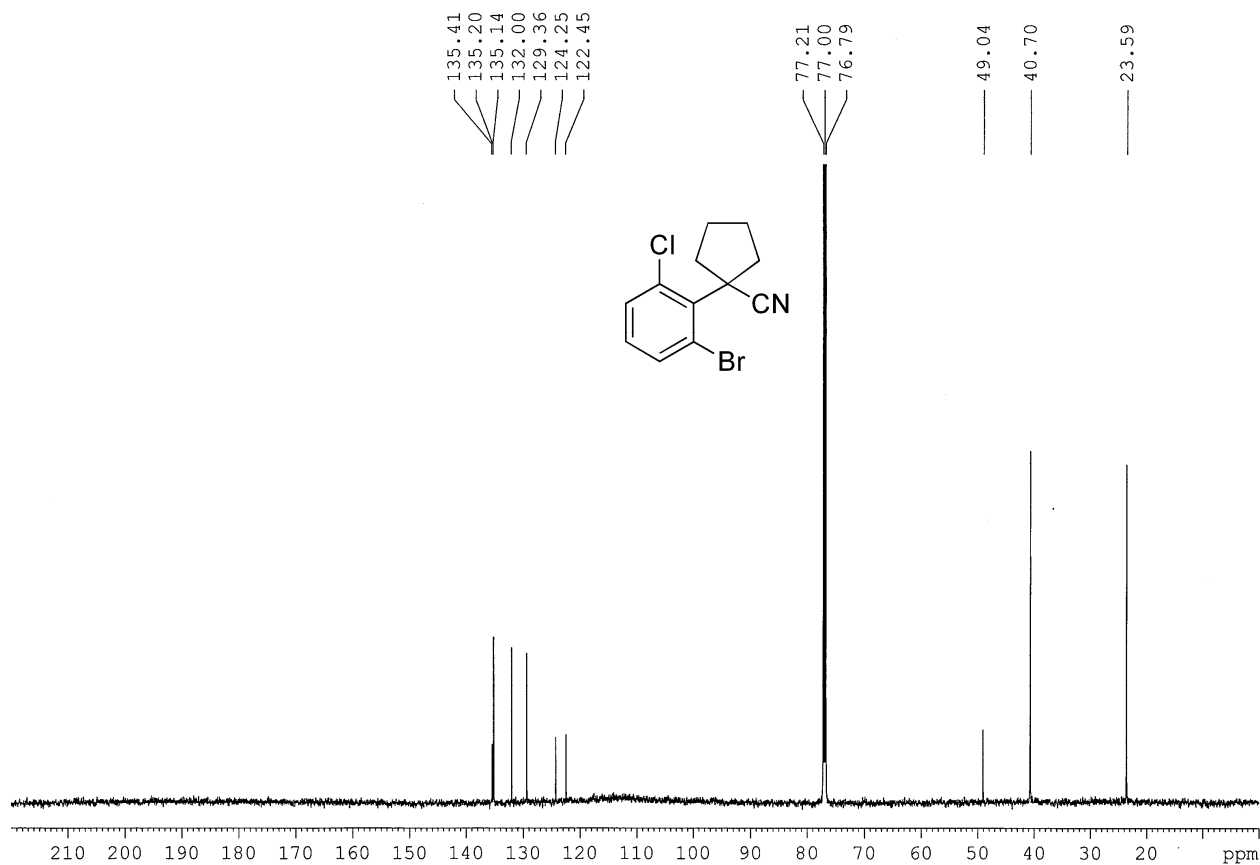

# 1-(2-Bromo-5-(trifluoromethyl)phenyl)cyclohexanecarbonitrile (1B)

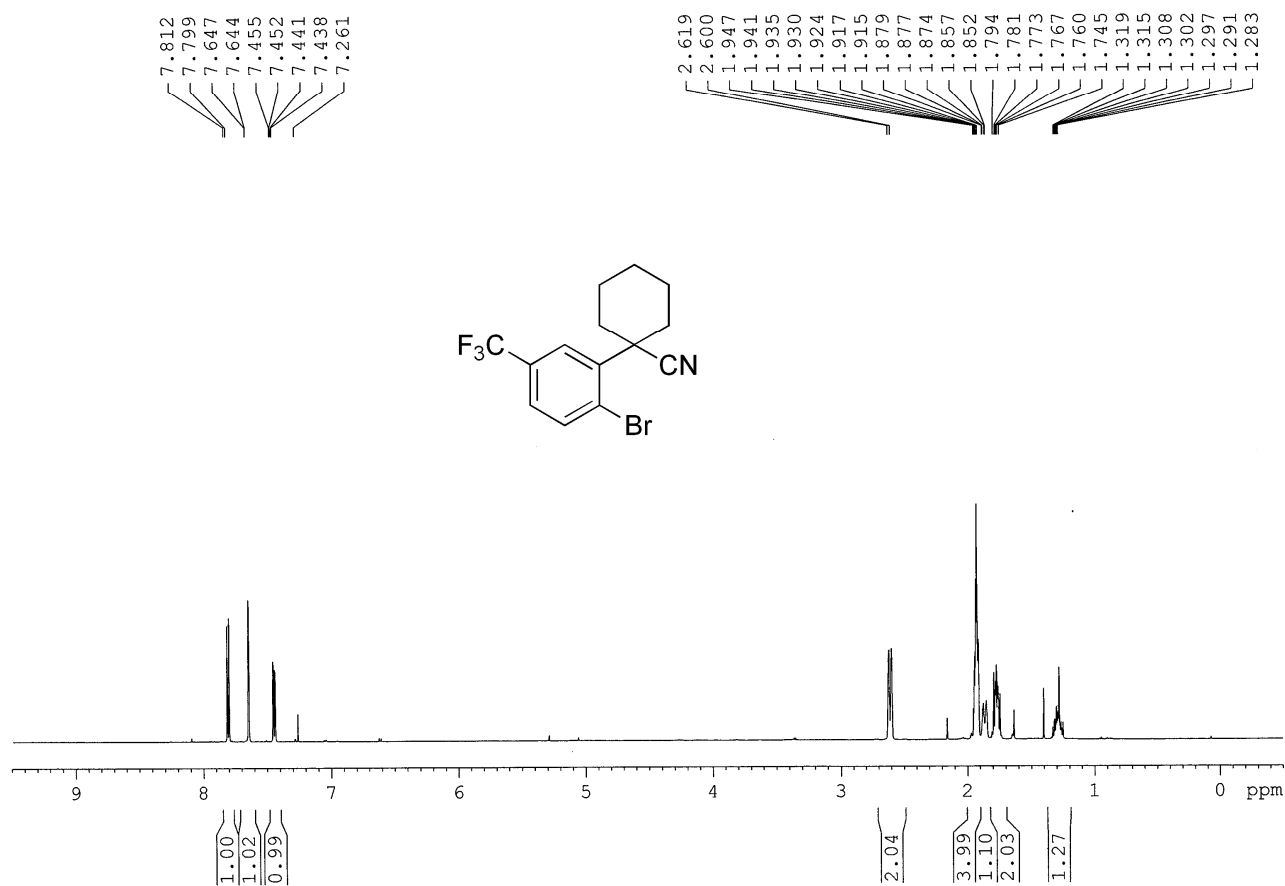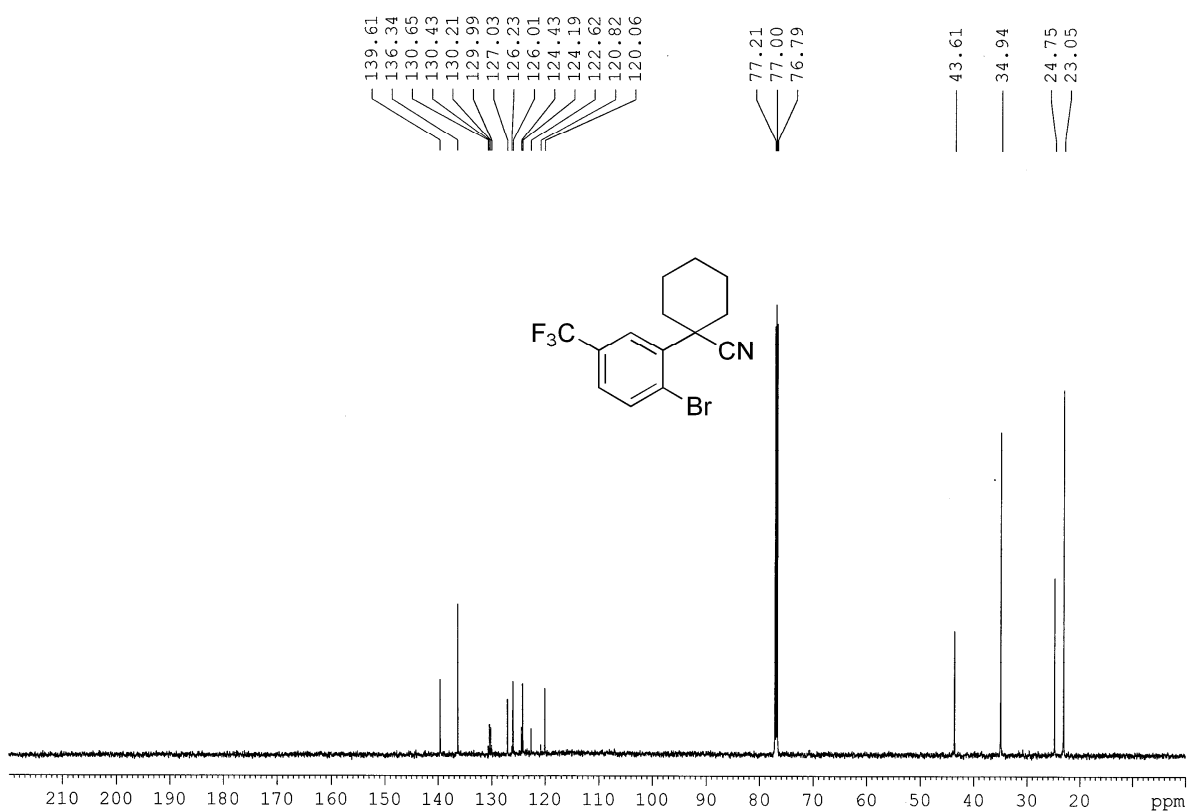

# 1-(2-Bromo-5-methoxyphenyl)cyclopentanecarbonitrile (1C)

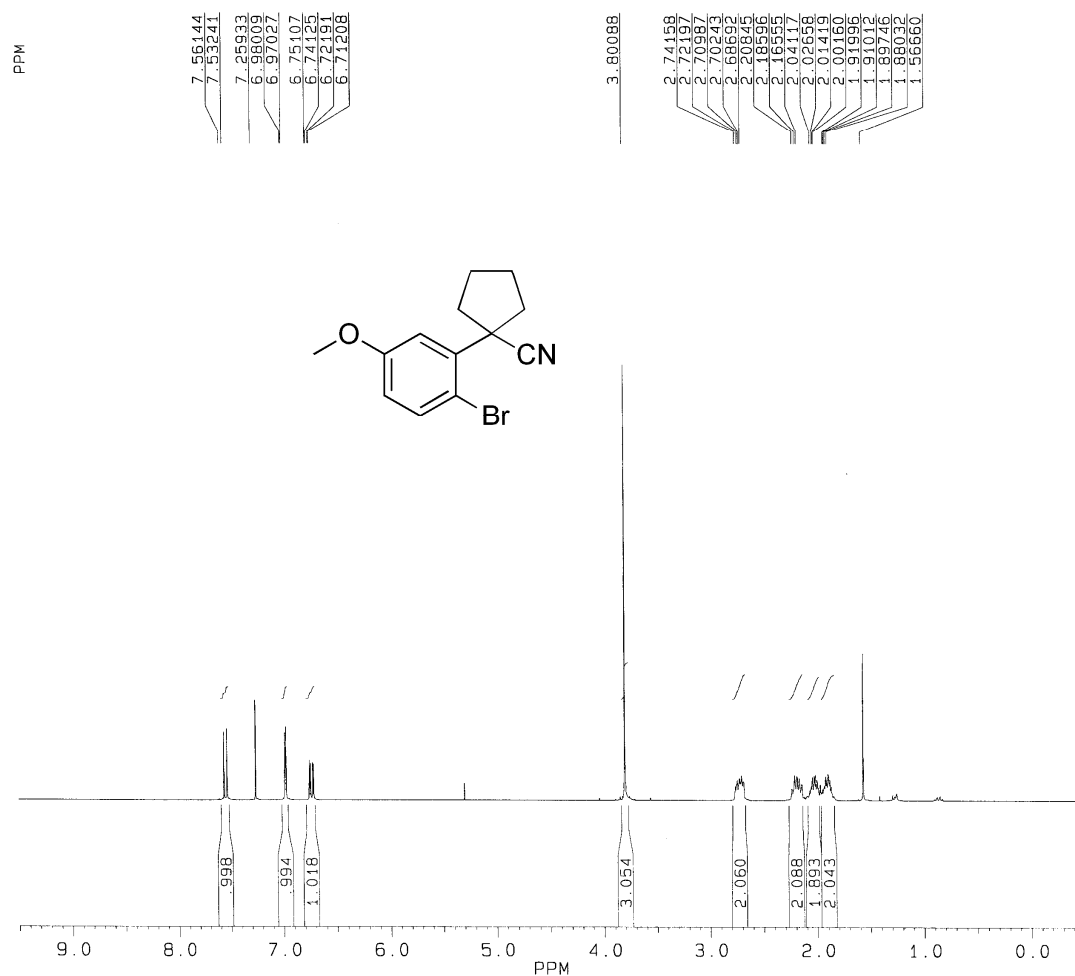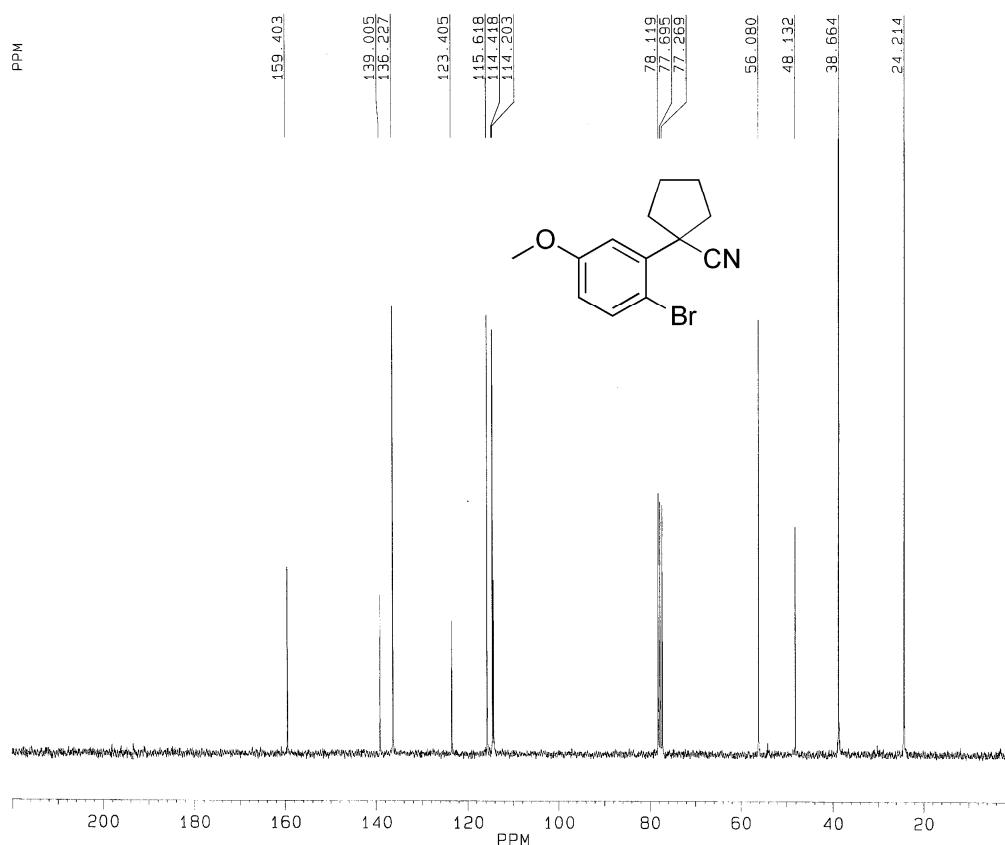

**BRUKER**

D0229.904  
DATE ??-??-??

SF 75.469  
SY 75.0  
Q1 6517.695  
SI 32768  
TD 32768  
SW 19230.769  
HZ/PT 1.174

PW 1.4  
RD 1.500  
AQ .652  
RG 200  
NS 207  
TE 297

FW 24100  
O2 4869.082  
DP 15H CPD

LB 2.000  
GB 0.0  
CX 21.00  
CY 0.0  
F1 220.009P  
F2 .013P  
HZ/CM 790.606  
PPM/CM 10.476  
SR -1443.71



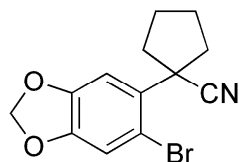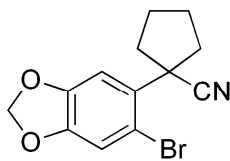

**4-(6-Bromobenzo[d][1,3]dioxol-5-yl)tetrahydro-2H-pyran-4-carbonitrile (1E)**

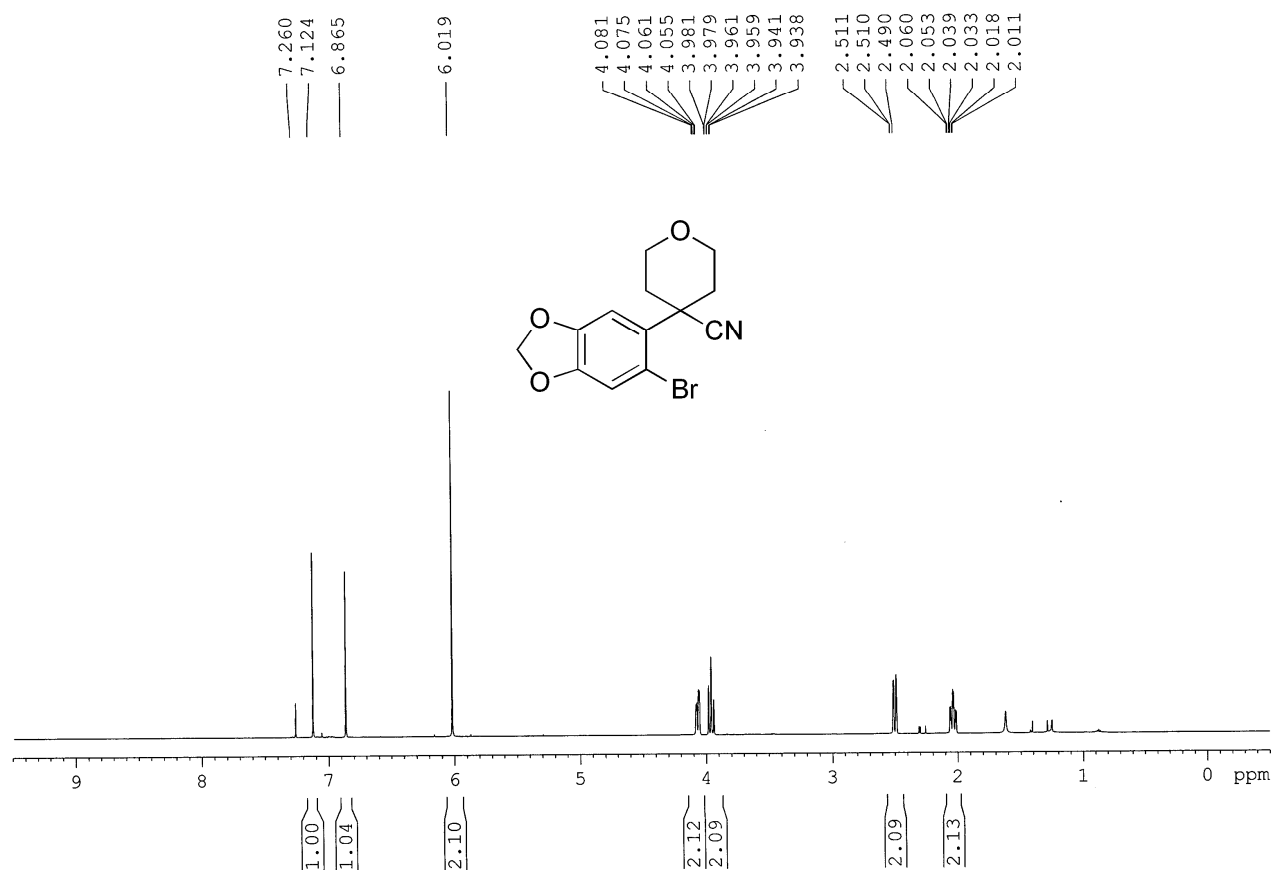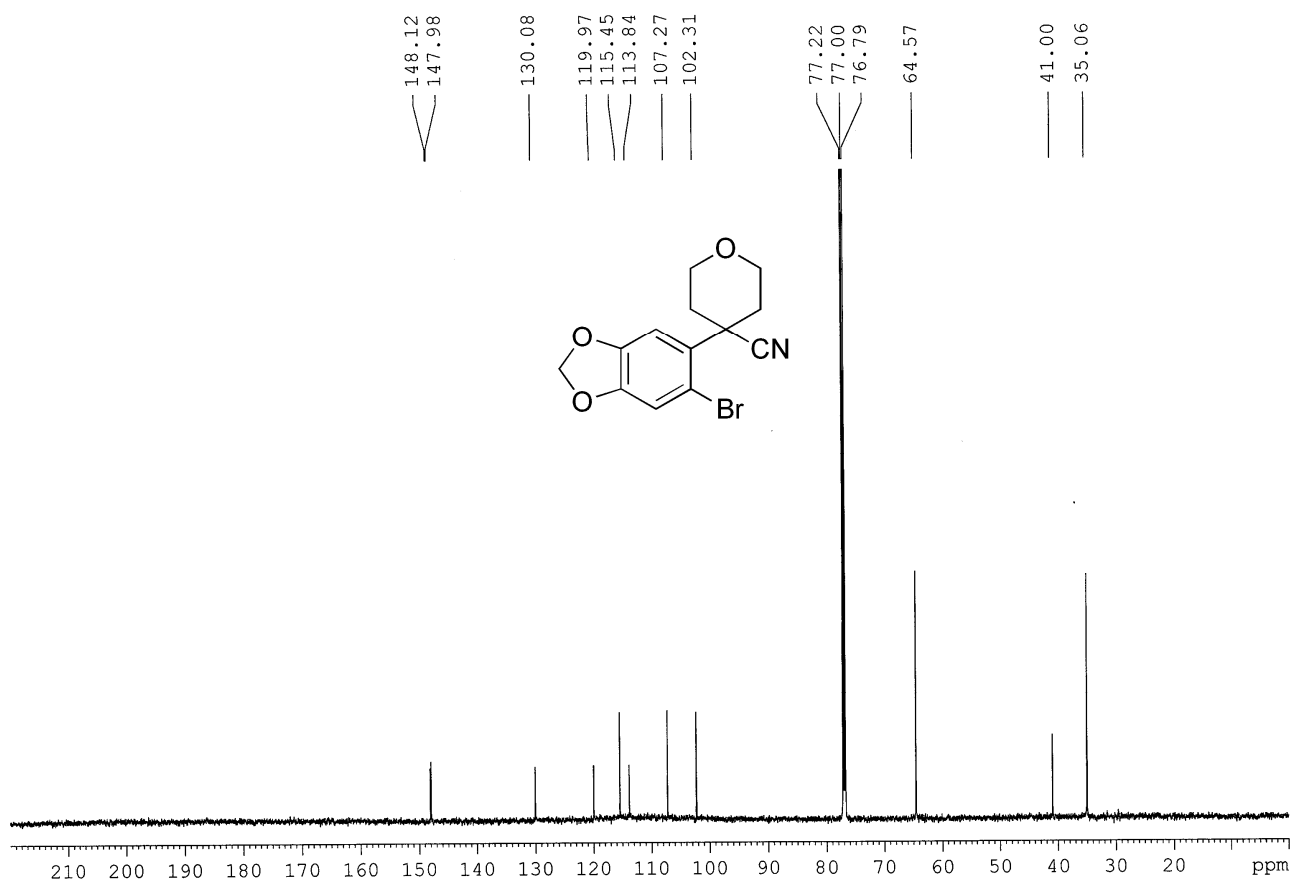

# **2-(2-Bromophenyl)-2-methylpropanamide (3a)**

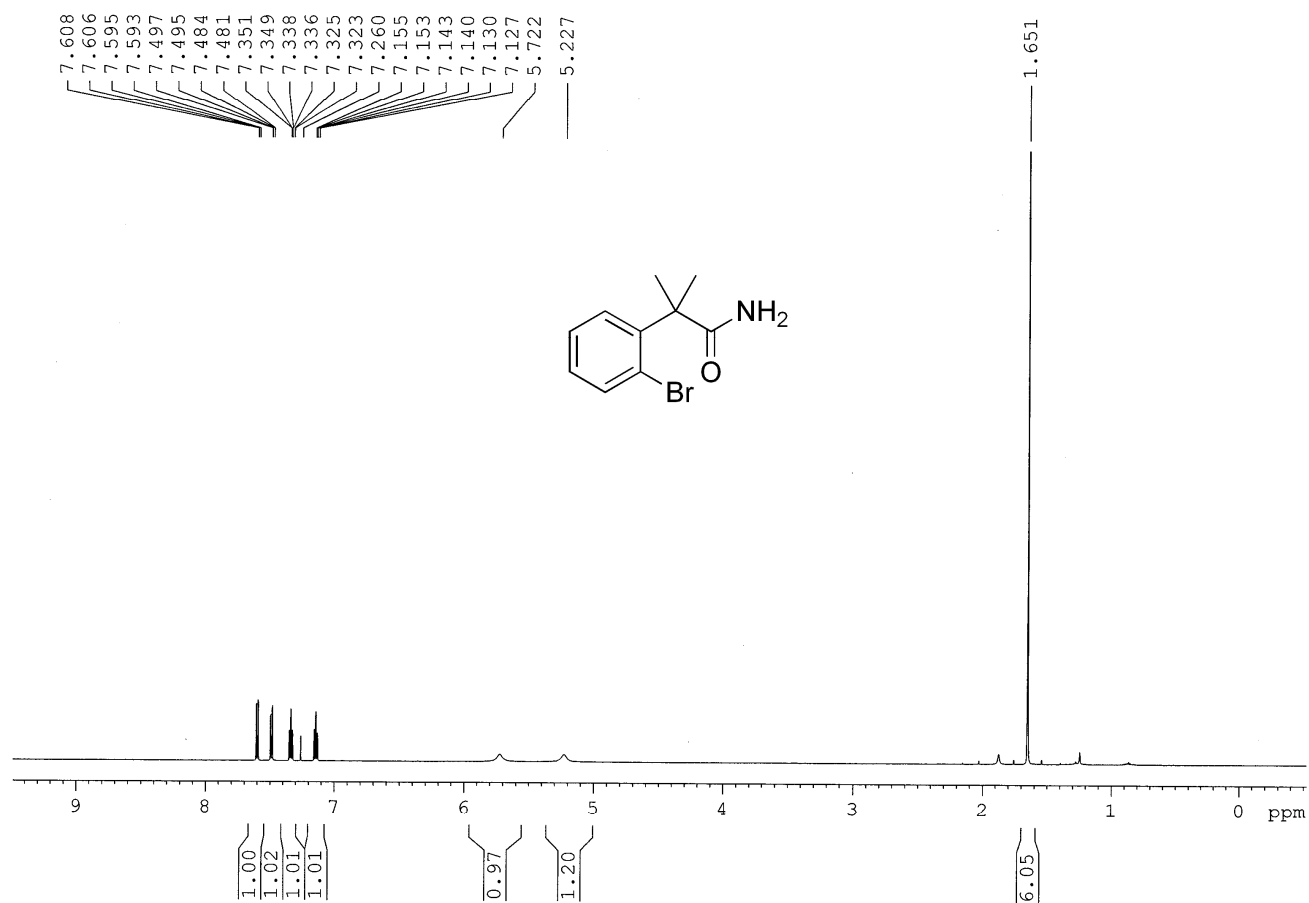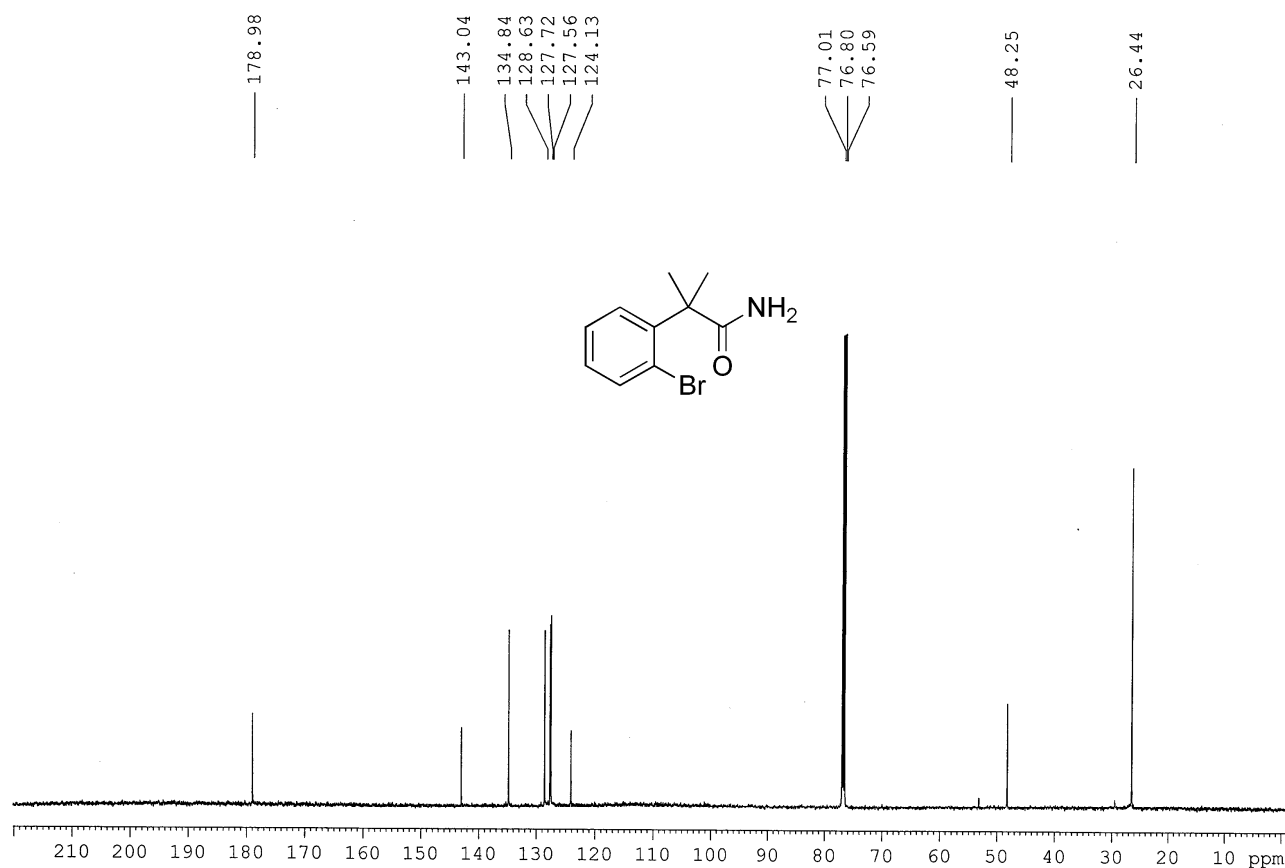

2-(2-Bromophenyl)acrylonitrile (5x)

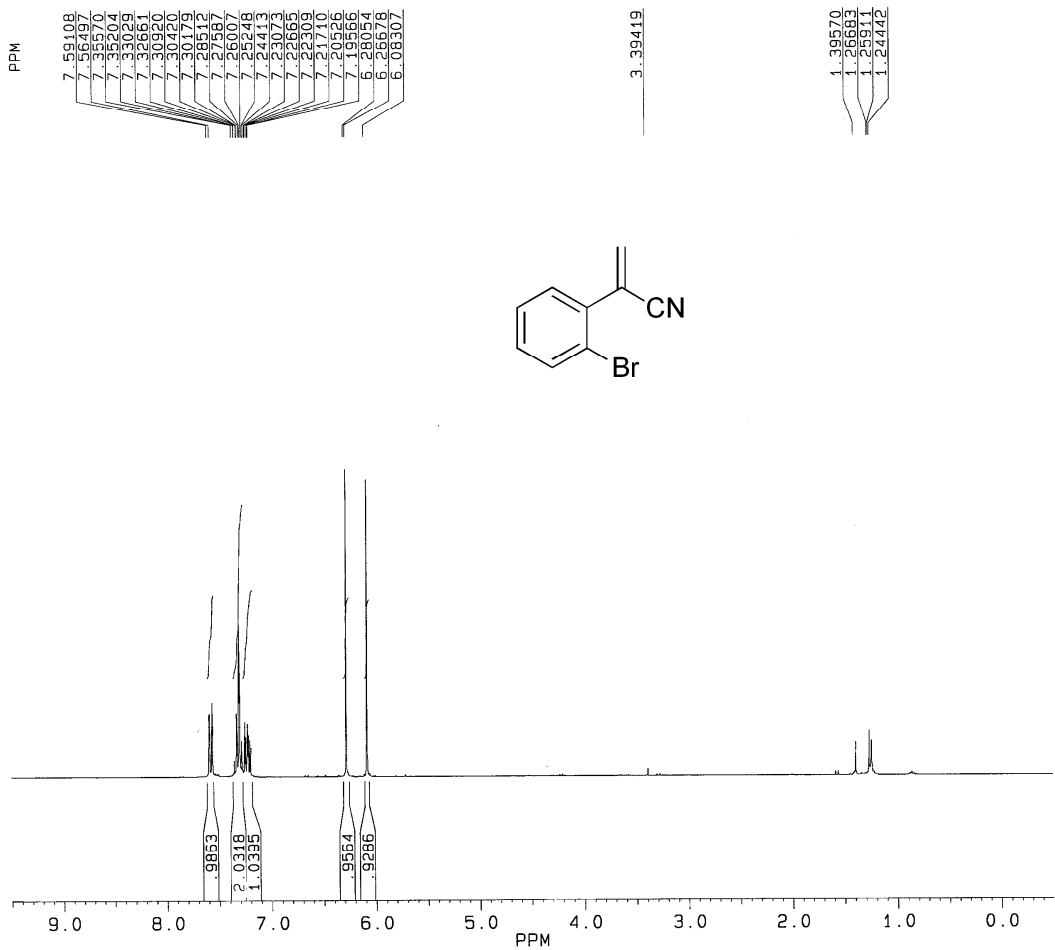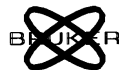

D1222.008  
DATE ??-??-??  
SF 300.133  
SY 299.0  
O1 5018.332  
SI 16384  
TD 16384  
SW 4807.692  
HZ/PT .587  
PW 1.4  
RD 1.000  
AQ 1.704  
RG 10  
NS 16  
TE 297  
FW 6100  
O2 0.0  
DP 63L P0  
LB 0.0  
GB 0.0  
CX 21.00  
CY 0.0  
F1 9.501P  
F2 -.499P  
HZ/CM 142.918  
PPM/CM .476  
SR 3367.55

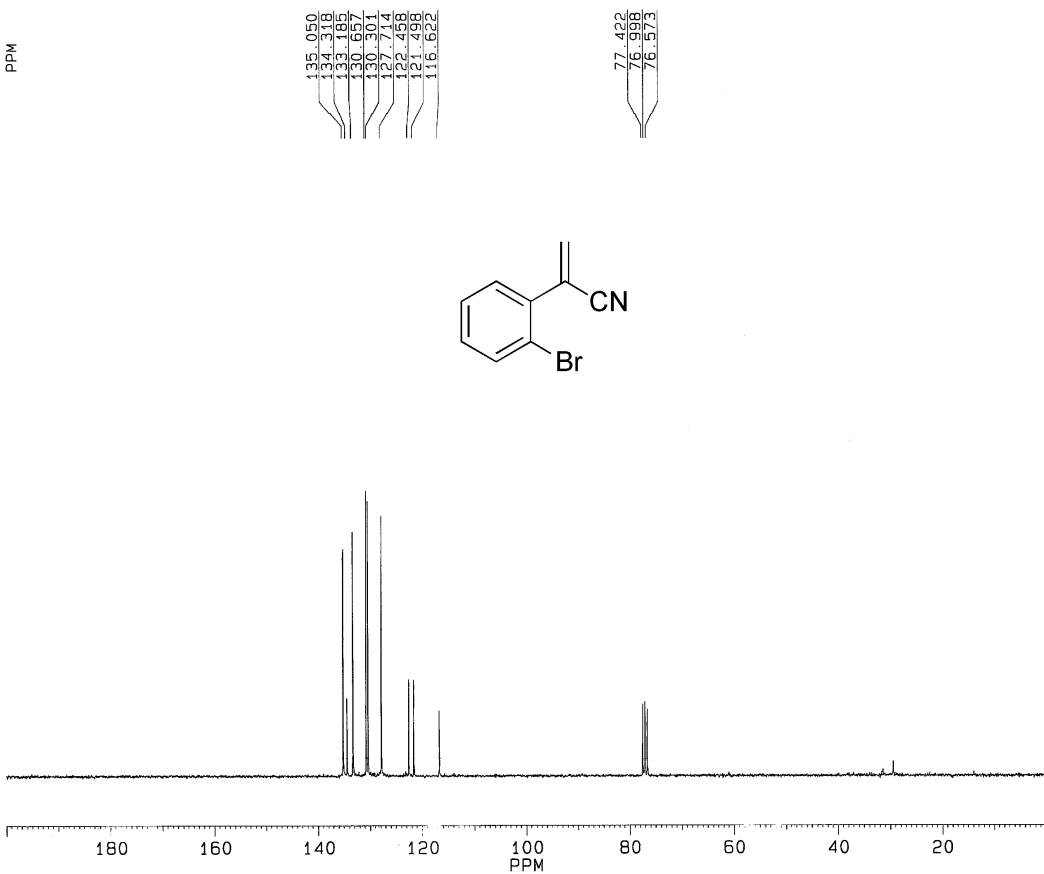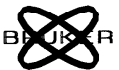

D1221.908  
DATE ??-??-??  
SF 75.469  
SY 75.0  
O1 6517.695  
SI 32768  
TD 32768  
SW 19230.769  
HZ/PT 1.174  
PW 1.4  
RD 1.500  
AQ .852  
RG 160  
NS 160  
TE 297  
FW 24100  
O2 4869.082  
DP 15H CPD  
LB 2.000  
GB 0.0  
CX 21.00  
CY 0.0  
F1 200.008P  
F2 .013P  
HZ/CM 718.728  
PPM/CM 9.524  
SR -1378.5

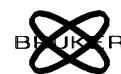

|        |         |
|--------|---------|
| FW     | 6100    |
| O2     | 0.0     |
| DP     | 63L P0  |
| LB     | 0.0     |
| GB     | 0.0     |
| CX     | 21.00   |
| CY     | 0.0     |
| F1     | 9.501P  |
| F2     | -.499P  |
| HZ/CM  | 142.918 |
| PPM/CM | .476    |
| SR     | 3367.55 |

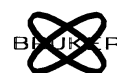

|        |          |
|--------|----------|
| LB     | 2.000    |
| GB     | 0.0      |
| CX     | 21.00    |
| CY     | 0.0      |
| F1     | 200.008P |
| F2     | .013P    |
| HZ/CM  | 718.728  |
| PPM/CM | 9.524    |
| SR     | -1401.45 |

# 2-(2-Bromo-5-methoxyphenyl)acrylonitrile (5F)

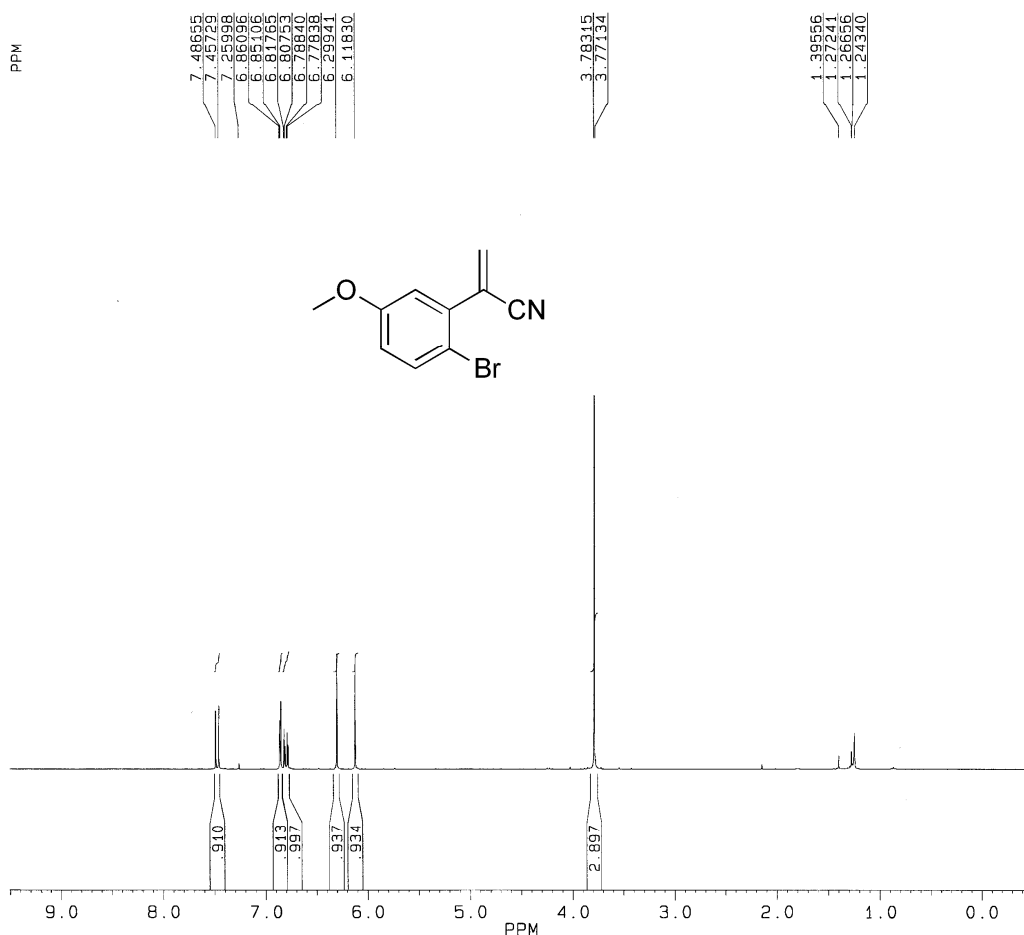

~~BRUKER~~

D1222.019  
DATE ??-??-??

SF 300.133  
SY 299.0  
O1 5018.332  
SI 16384  
TD 16384  
SW 4807.692  
HZ/PT .587

PW 1.4  
RD 1.000  
AQ 1.704  
RG 20  
NS 16  
TE 297

FW 6100  
O2 0.0  
DP 63L P0  
LB 0.0  
GB 0.0  
CX 21.00  
CY 0.0  
F1 9.501P  
F2 .499P  
HZ/CM 142.918  
PPM/CM .476  
SR 3367.55

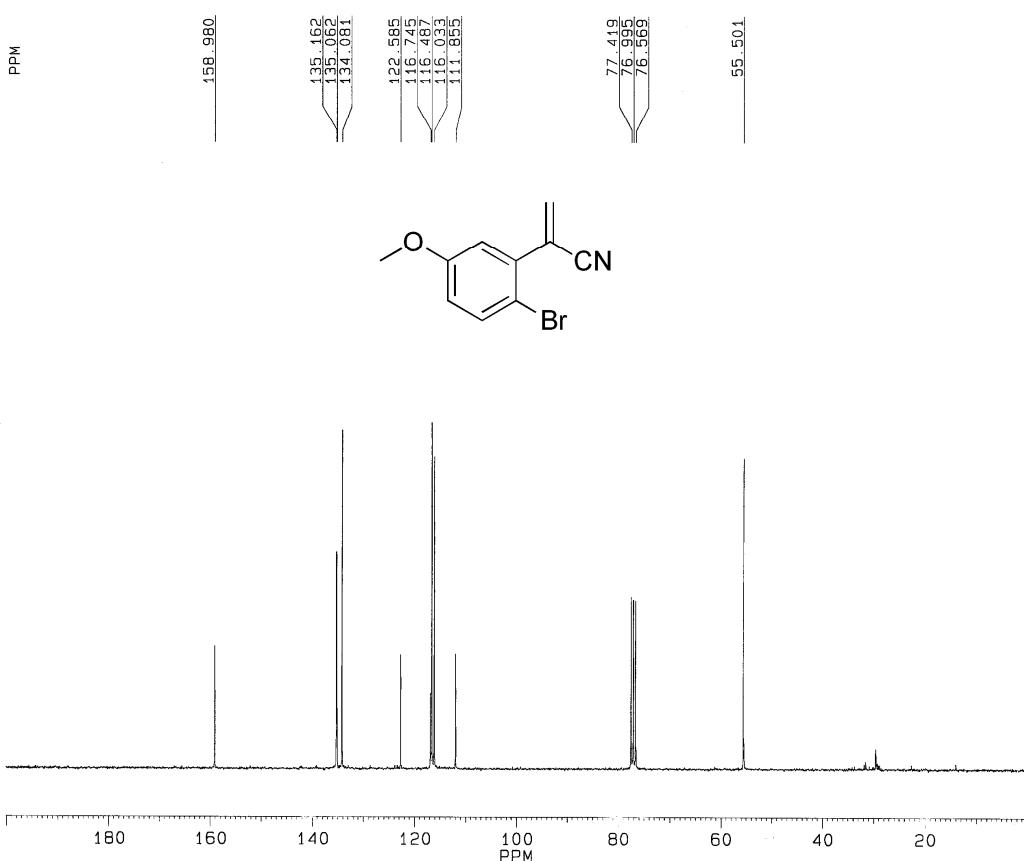

~~BRUKER~~

D1222.901  
DATE ??-??-??

SF 75.469  
SY 75.0  
O1 6517.695  
SI 32768  
TD 32768  
SW 19230.769  
HZ/PT 1.174

PW 1.4  
RD 1.500  
AQ .852  
RG 200  
NS 1200  
TE 297

FW 24100  
O2 4869.082  
DP 15H CPD  
LB 2.000  
GB 0.0  
CX 21.00  
CY 0.0  
F1 200.008P  
F2 .013P  
HZ/CM 718.728  
PPM/CM 9.524  
SR -1392.06

### 3-(2-Bromo-5-methoxyphenyl)-1-methylpyrrolidine-3-carbonitrile (1F)

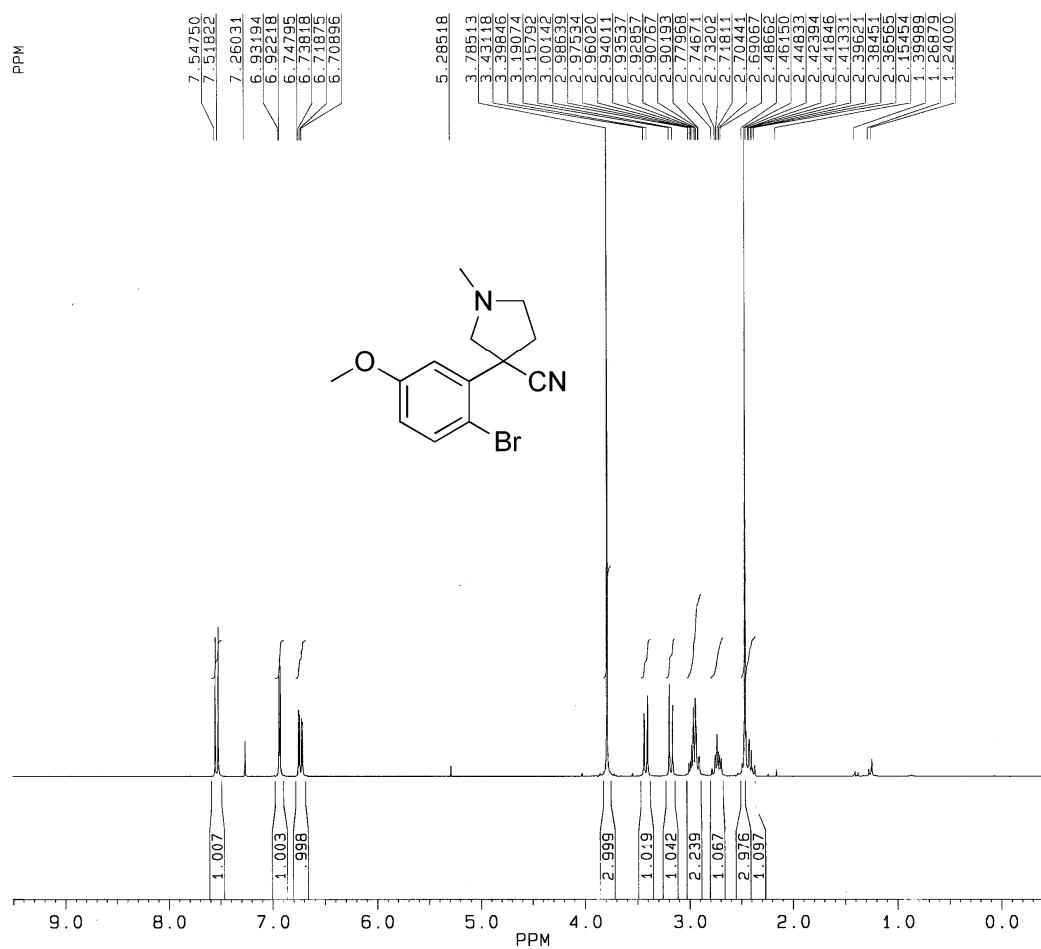

~~BRUKER~~

D1215.019  
DATE ??-??-??

SF 300.133  
SY 299.0  
Q1 5018.332  
SI 16384  
TD 16384  
SW 4807.692  
HZ/PT .587

PW 1.4  
RD 1.000  
AQ 1.704  
RG 32  
NS 16  
TE 297

FW 6100  
Q2 0.0  
DP 63L P0

LB 0.0  
GB 0.0  
CX 21.00  
CY 0.0  
F1 9.501P  
F2 -.499P  
HZ/CM 142.918  
PPM/CM .476  
SR 3367.55

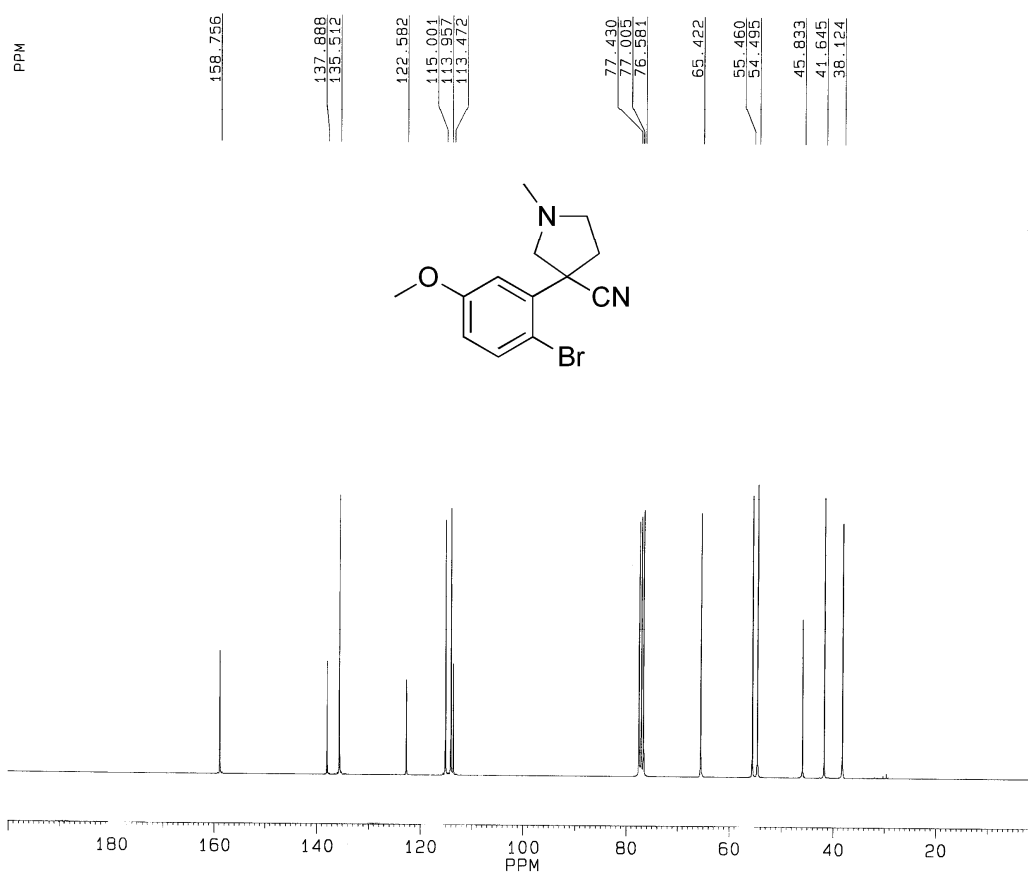

~~BRUKER~~

D0827.902  
DATE ??-??-??

SF 75.469  
SY 75.0  
Q1 6517.695  
SI 32768  
TD 32768  
SW 19230.769  
HZ/PT 1.174

PW 1.4  
RD 1.500  
AQ .852  
RG 200  
NS 50290  
TE 297

FW 24100  
Q2 4869.082  
DP 15H CPD

LB 2.000  
GB 0.0  
CX 21.00  
CY 0.0  
F1 200.008P  
F2 .013P  
HZ/CM 718.728  
PPM/CM 9.524  
SR -1395.58

# <sup>1</sup>H and <sup>13</sup>C NMR Spectra (600 MHz, CDCl<sub>3</sub>) for Products

## 3,3-Dimethylindolin-2-one (2a)

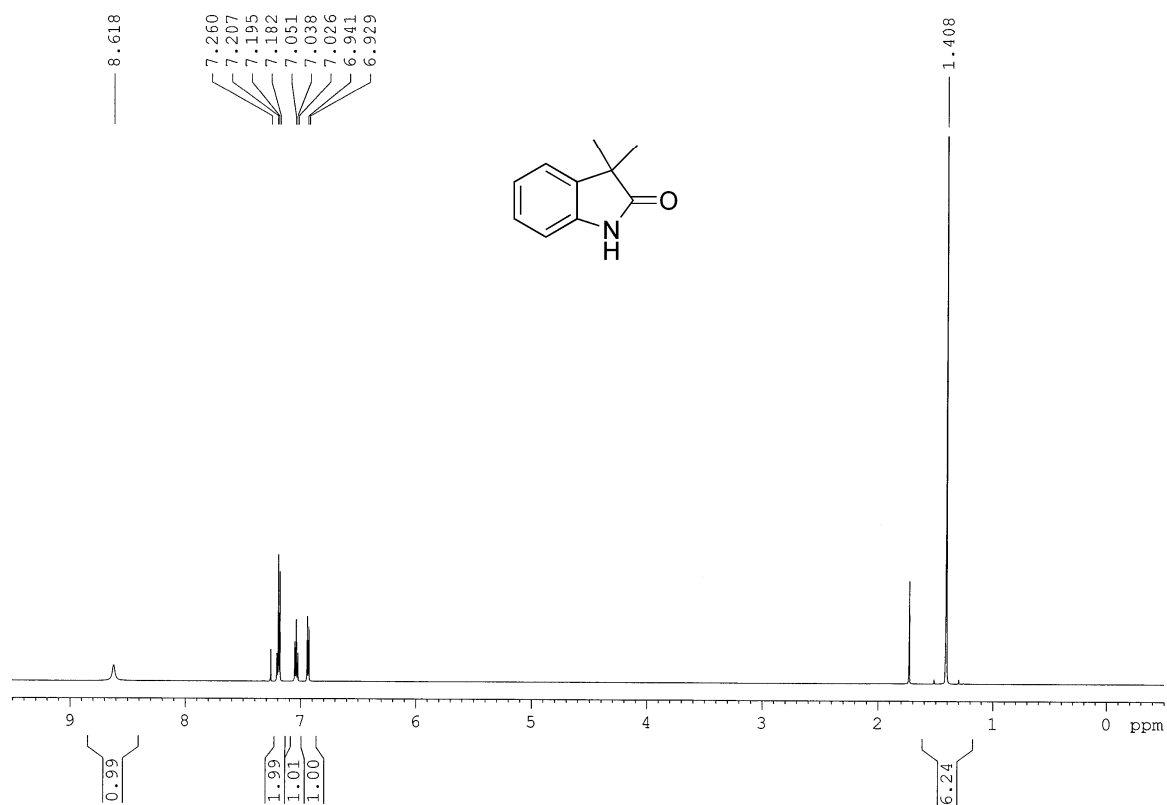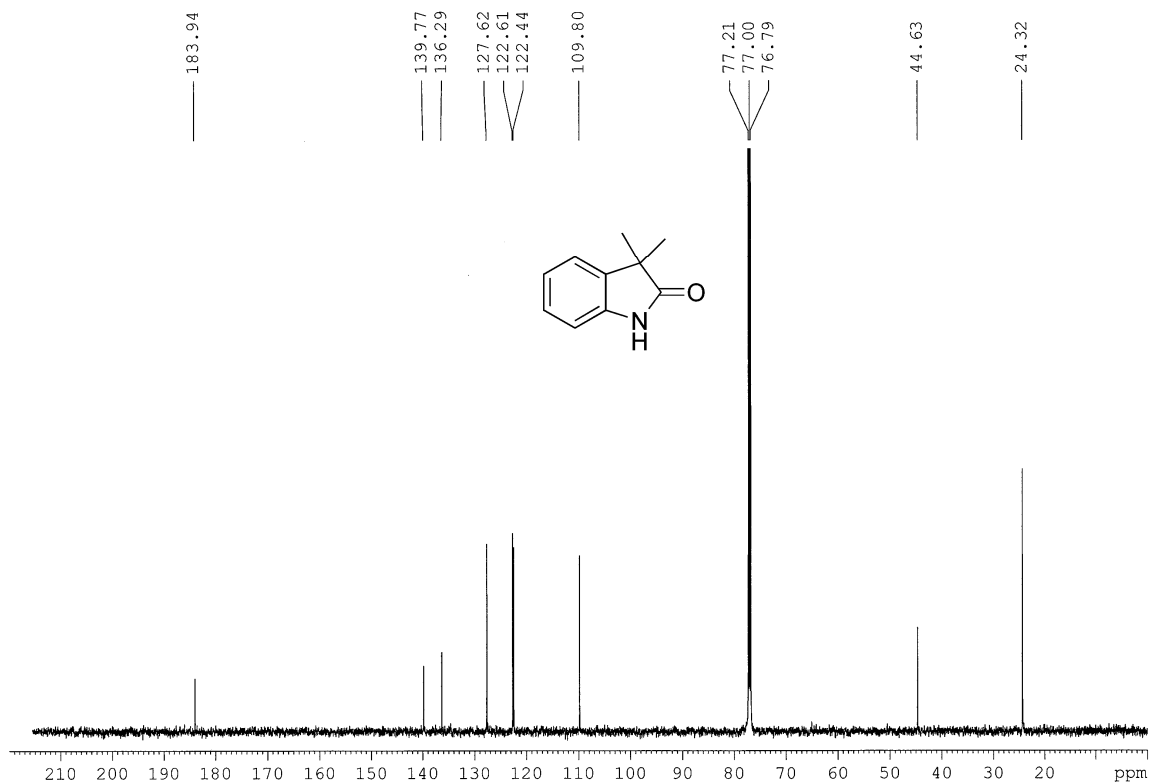



### 3,3-Dimethyl-5-(trifluoromethyl)indolin-2-one (2b)

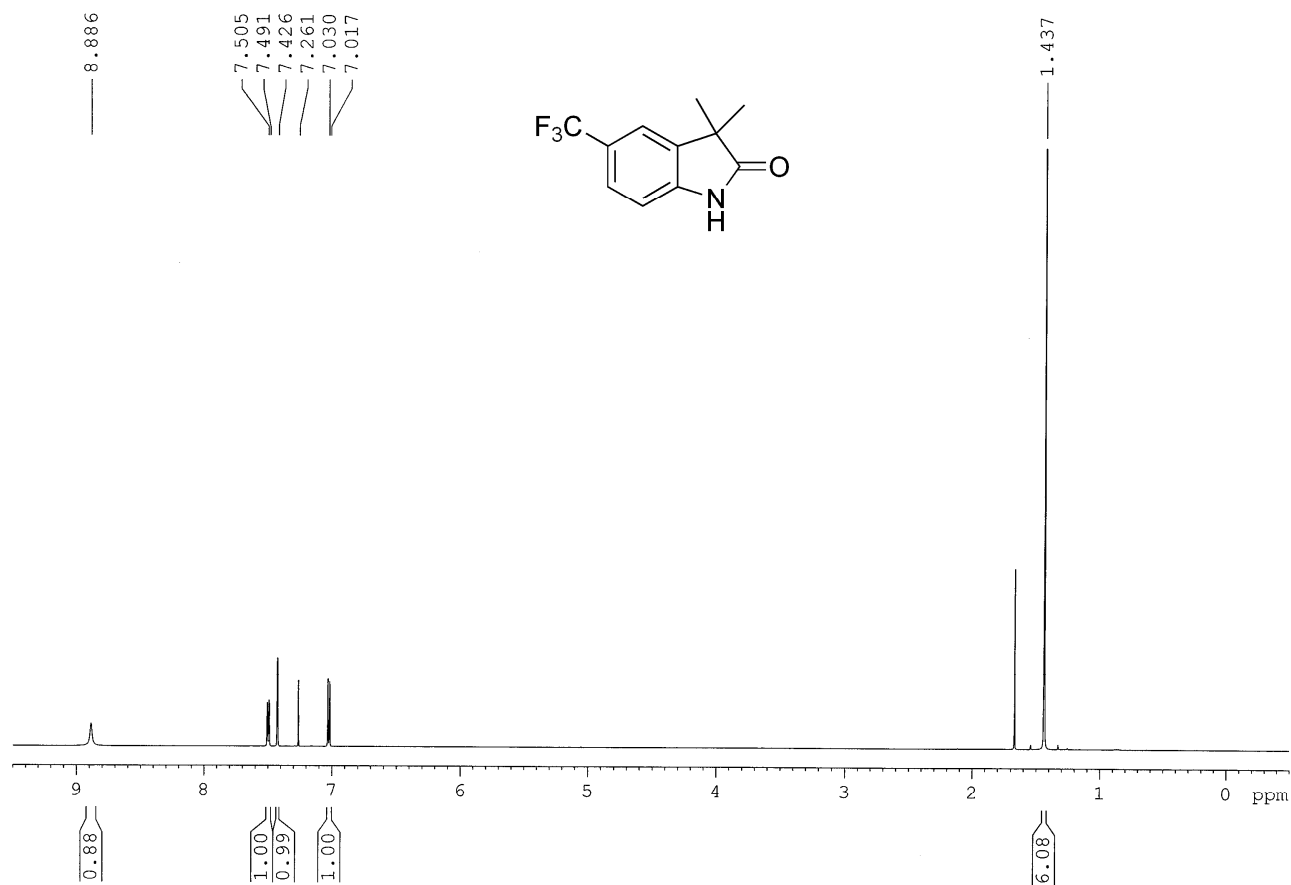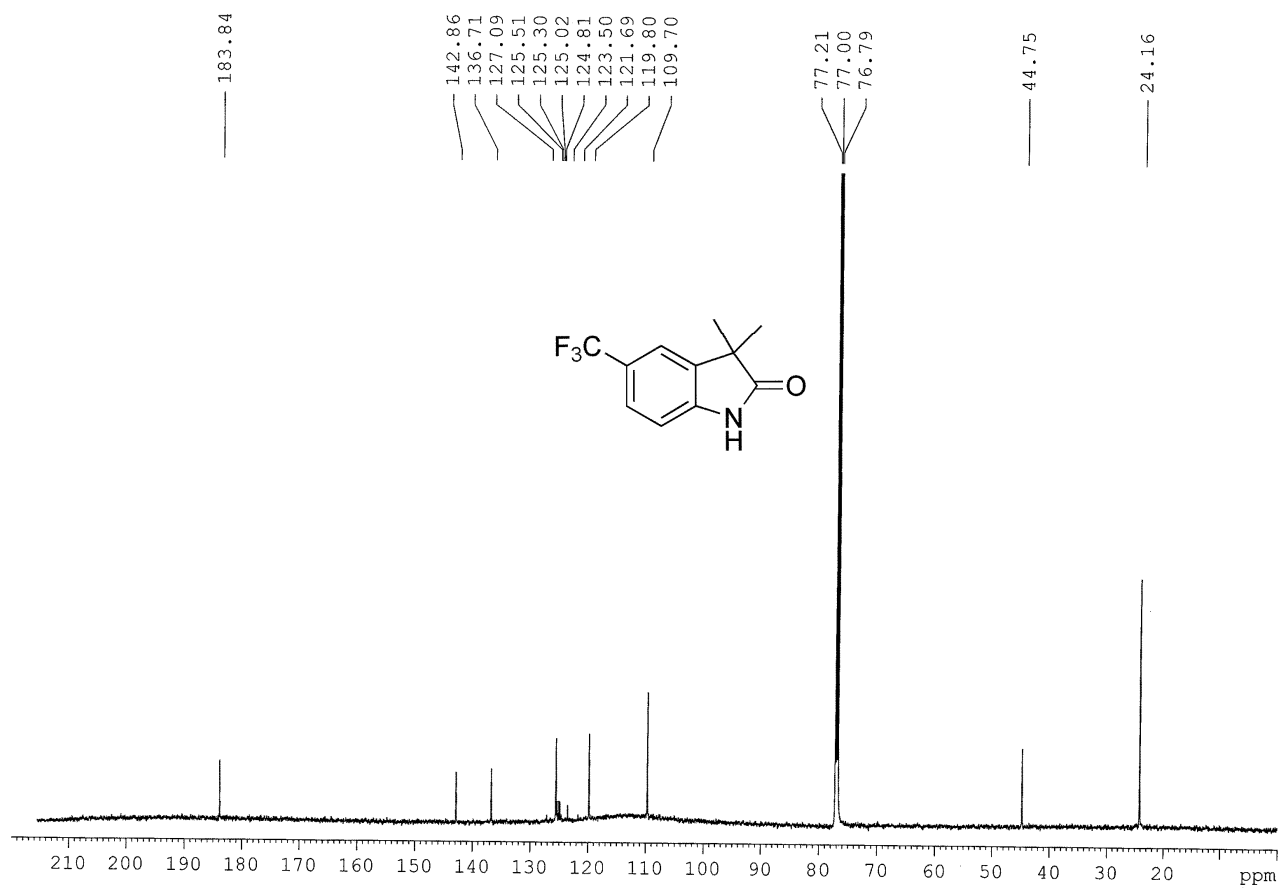

**5-Chloro-3,3-dimethylindolin-2-one (2c)**

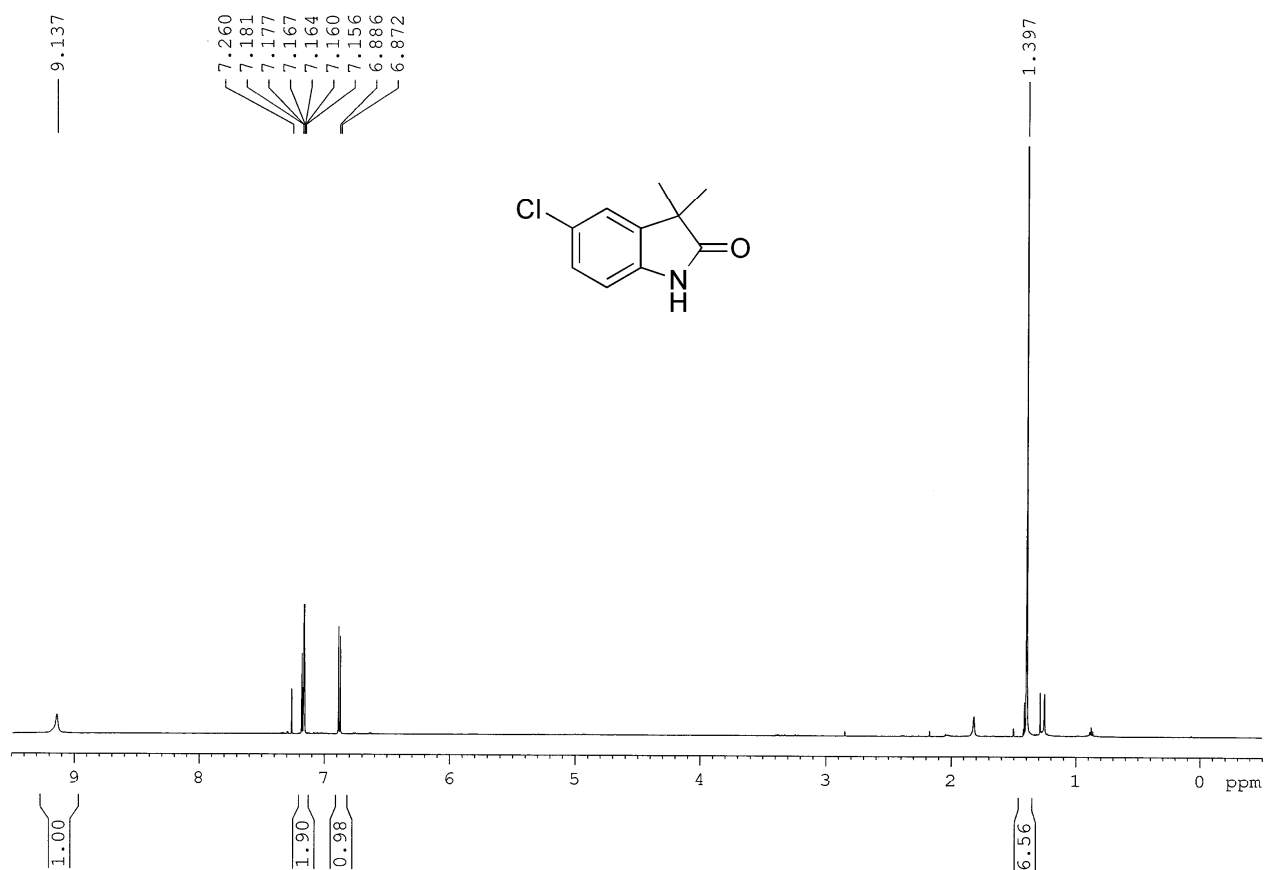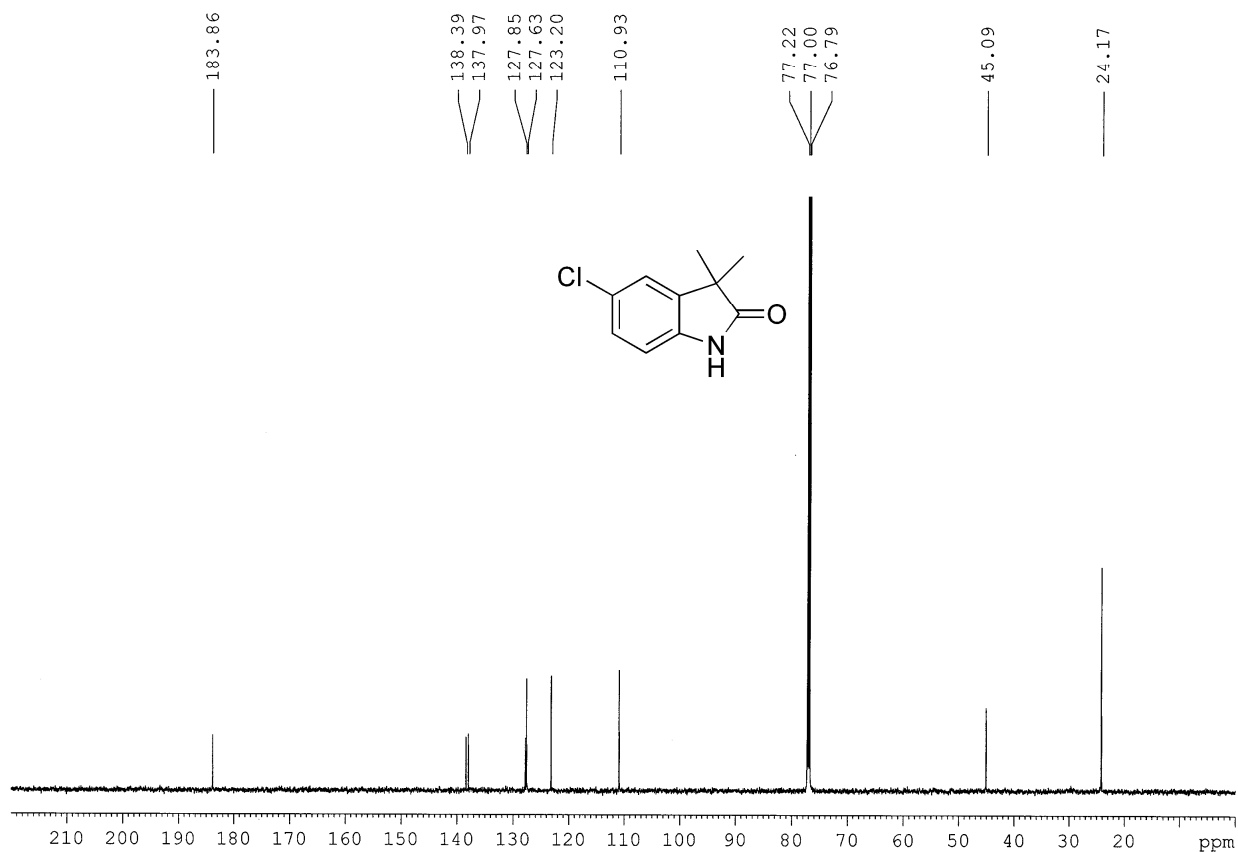

# 5-Methoxy-3,3-dimethylindolin-2-one (2d)

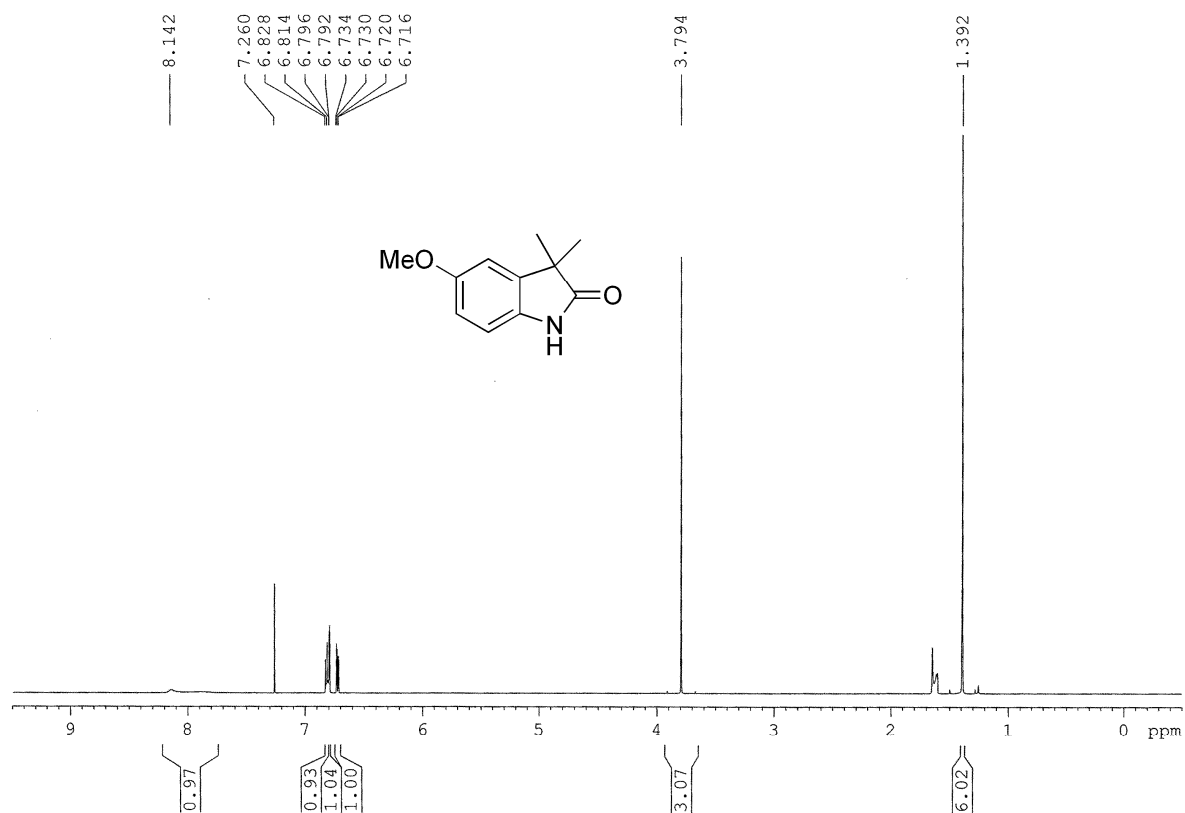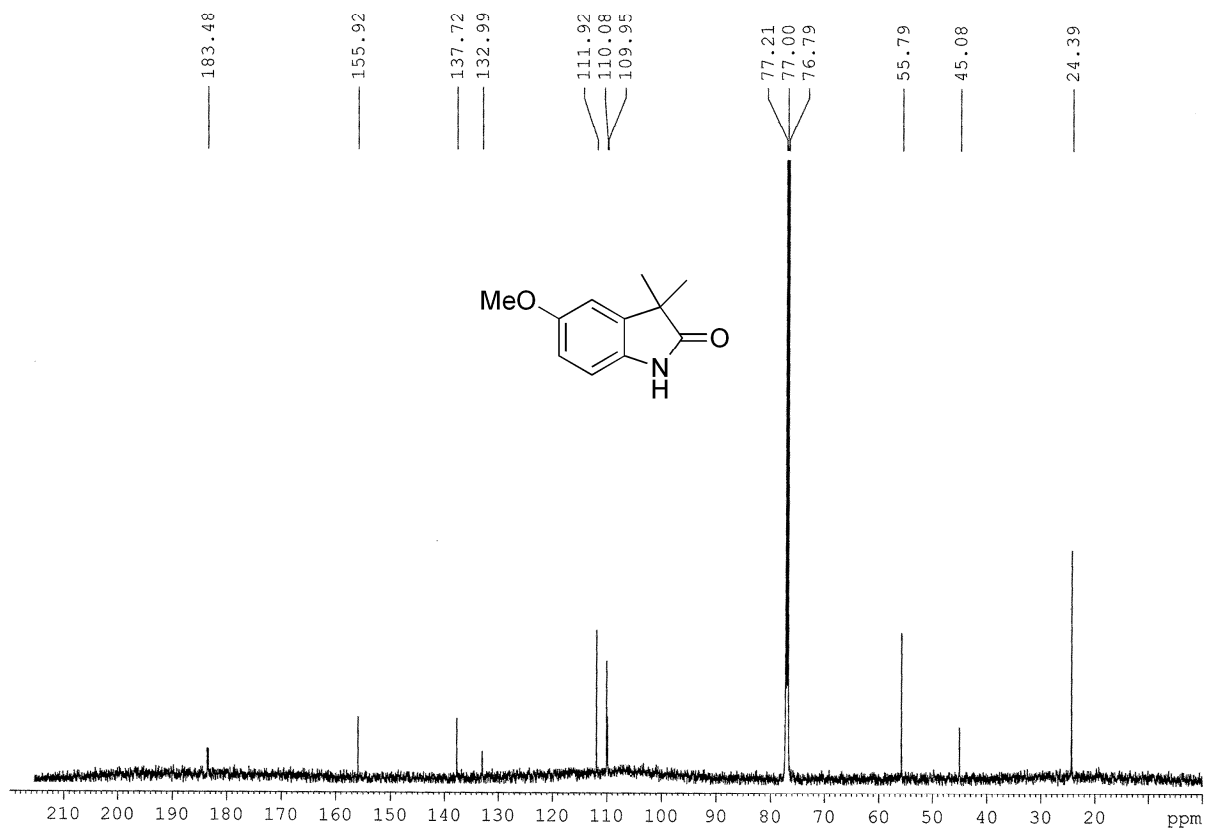

**7,7-Dimethyl-5H-[1,3]dioxolo[4,5-f]indol-6(7H)-one (2e)**

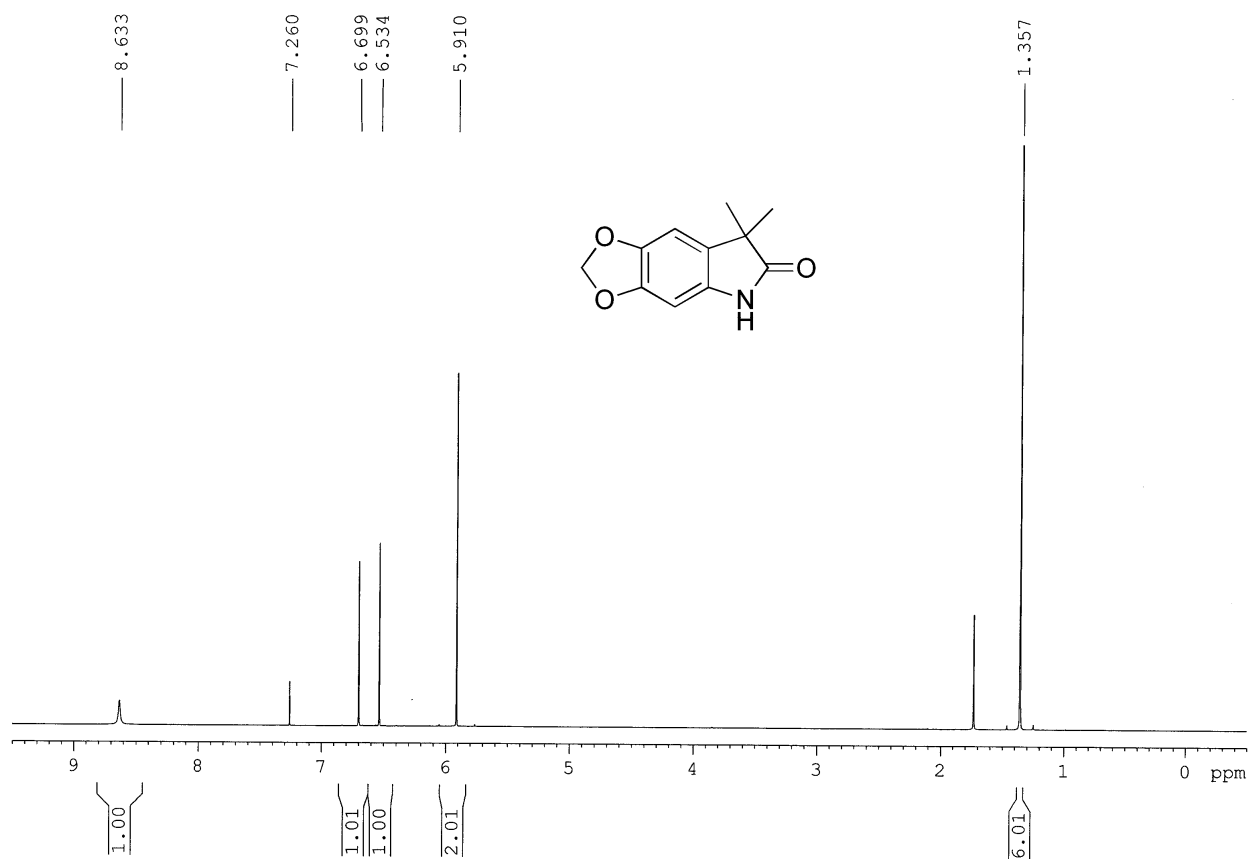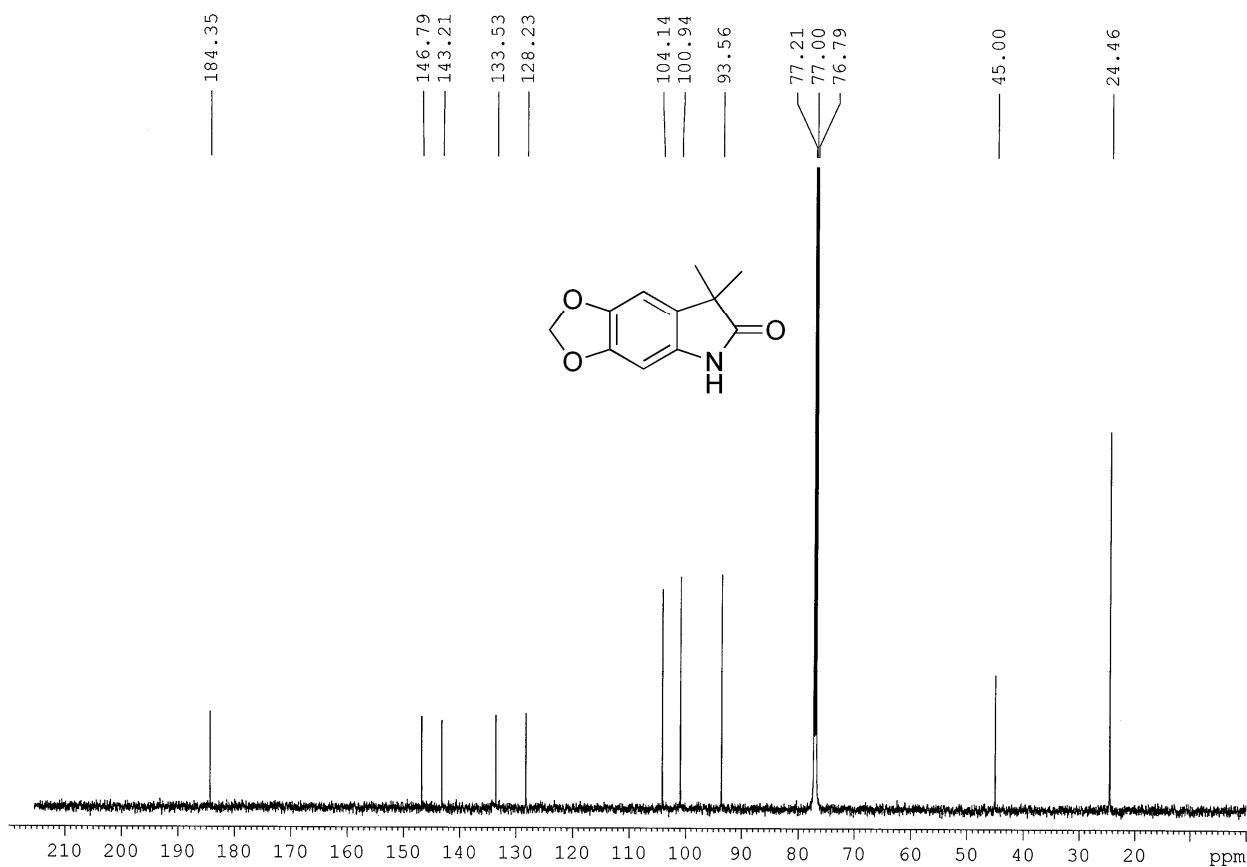

### 3,3-Dimethyl-6-(trifluoromethyl)indolin-2-one (2f)

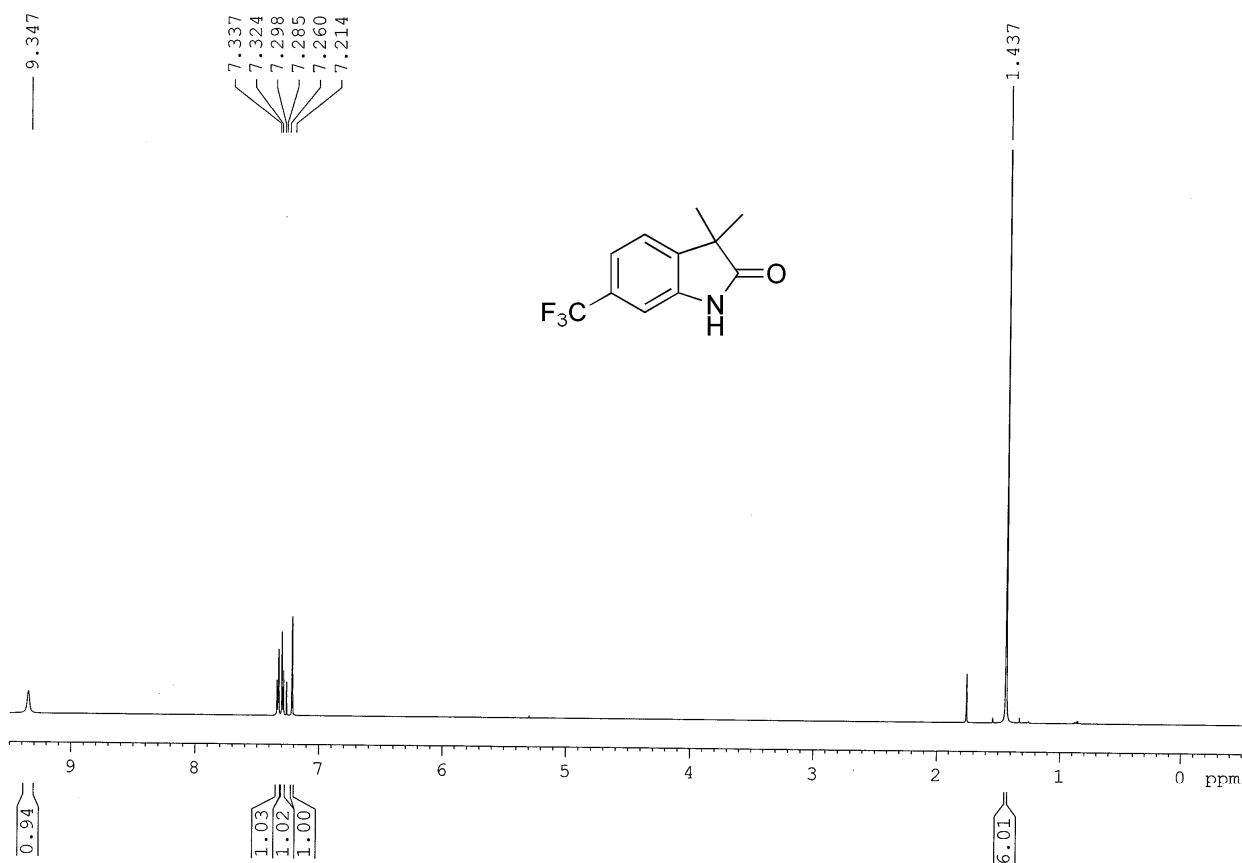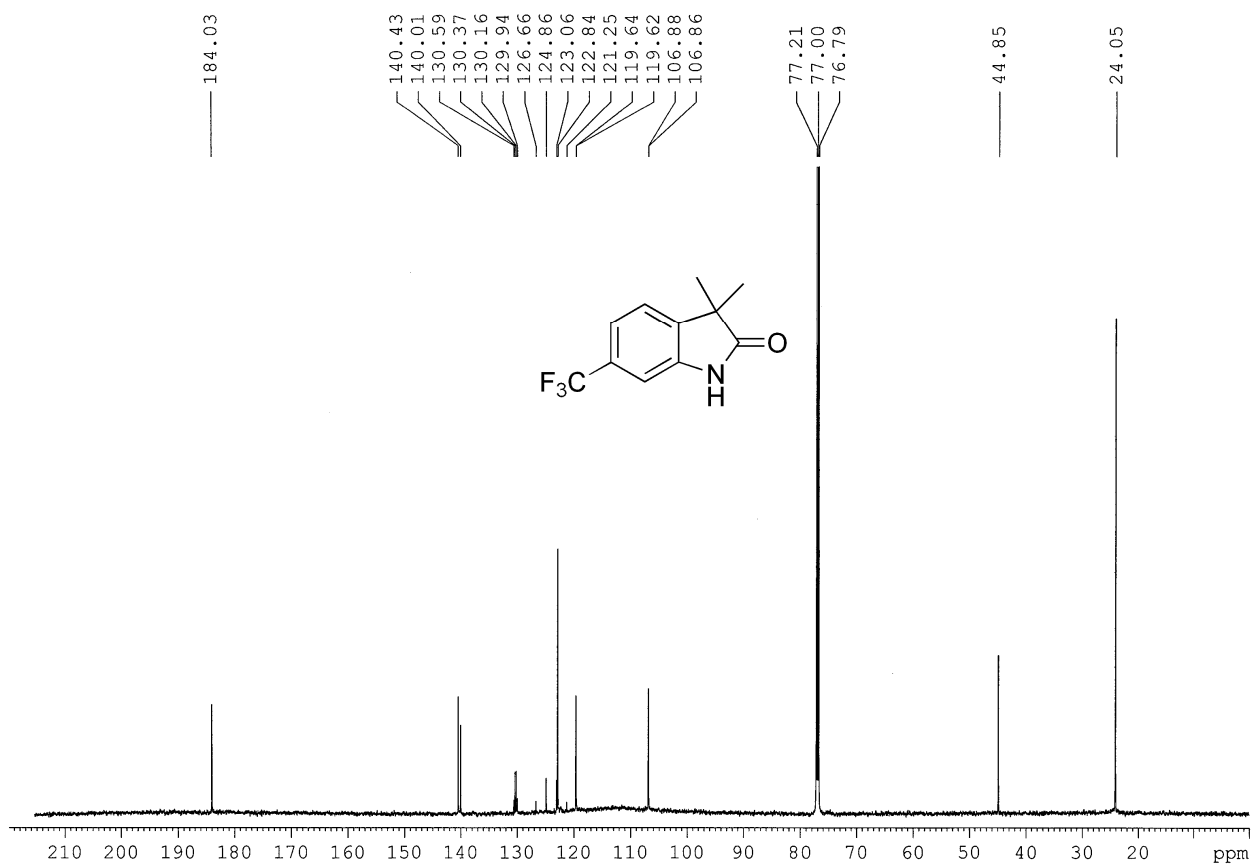

6-Methoxy-3,3-dimethylindolin-2-one (2g)

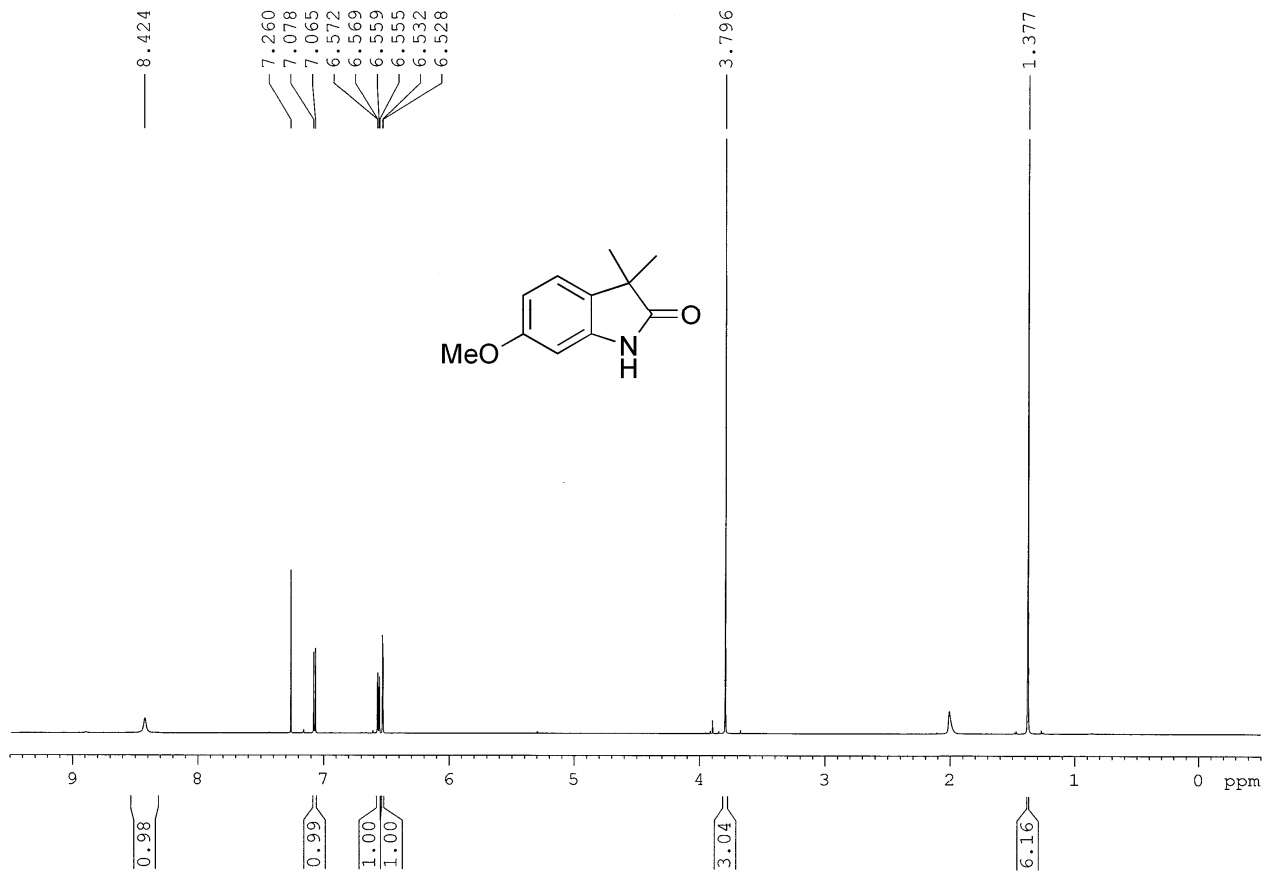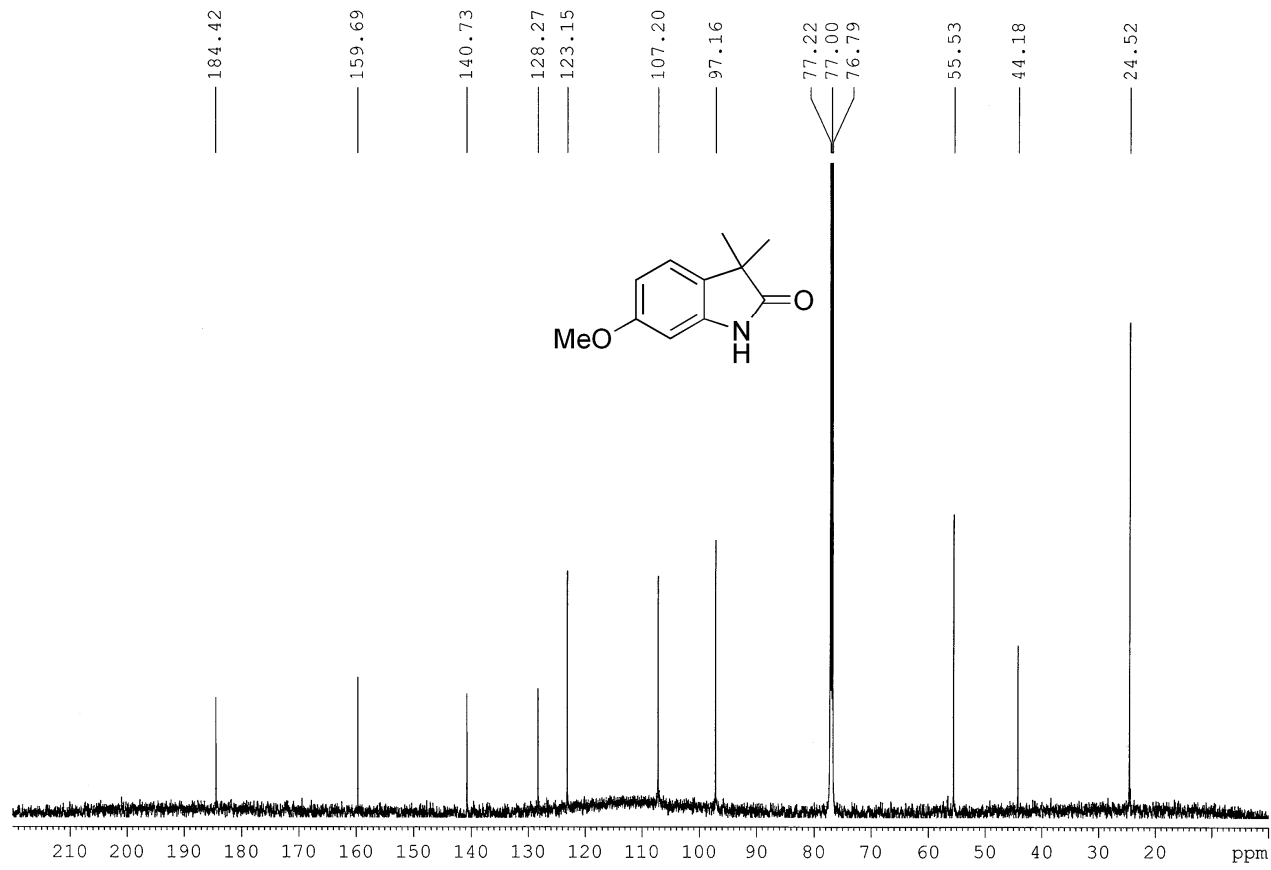

**4-Chloro-3,3-dimethylindolin-2-one (2h)**

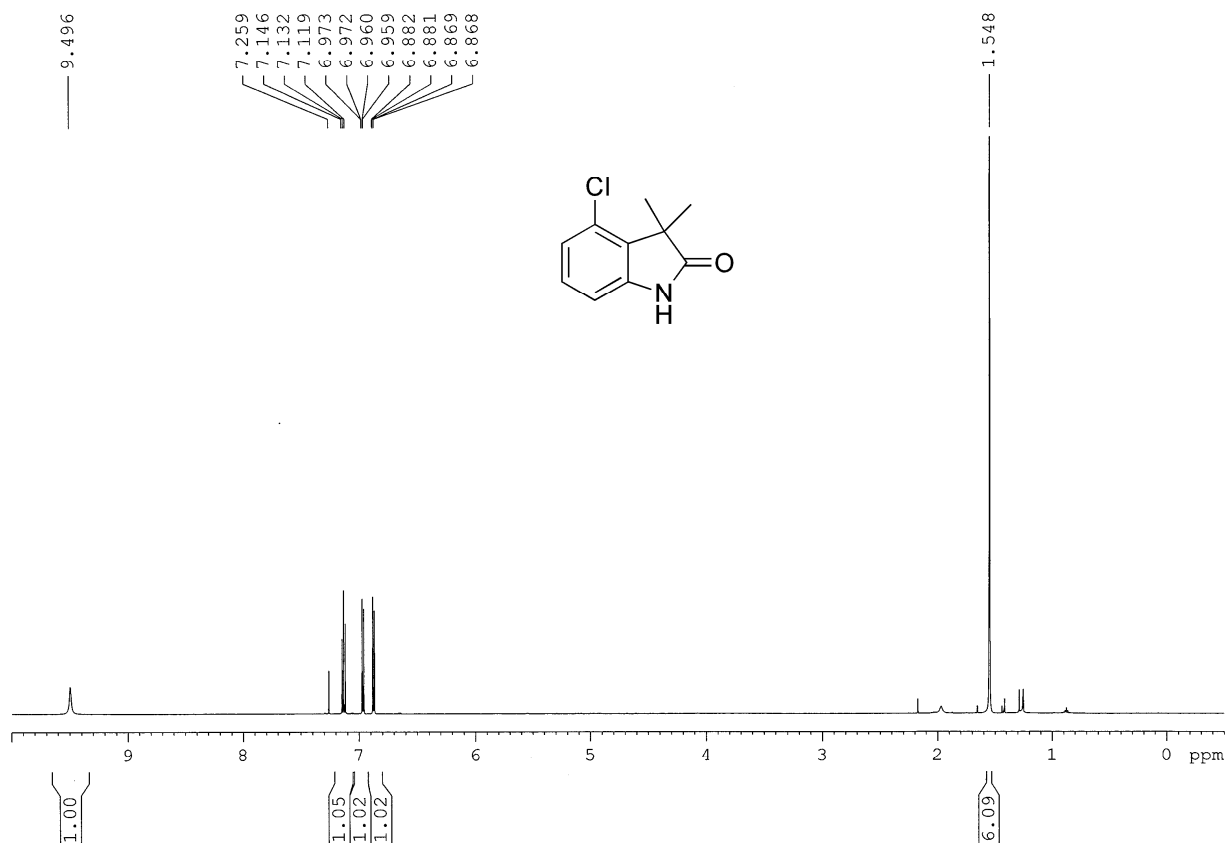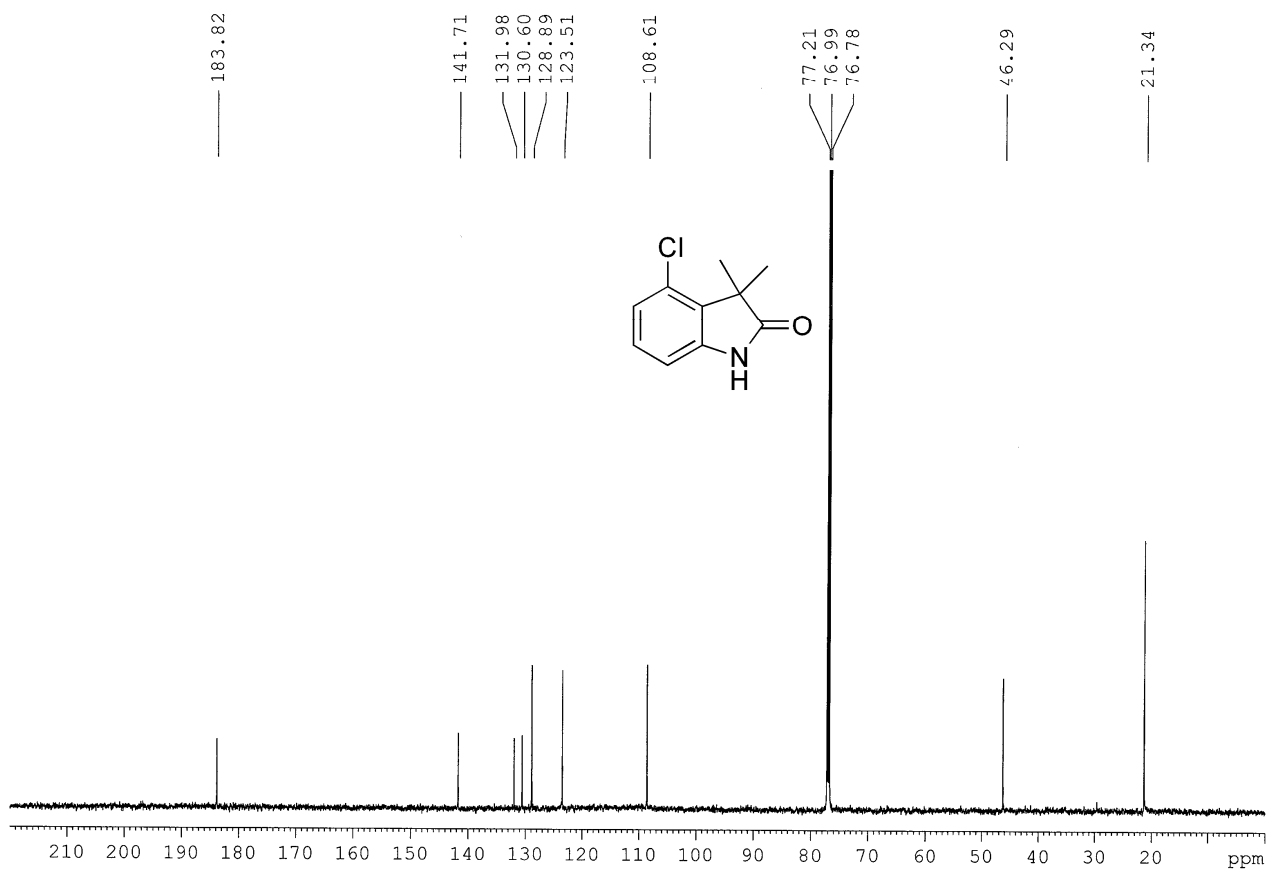

**3,3-Dimethyl-1*H*-benzo[*g*]indol-2(3*H*)-one (2i)**

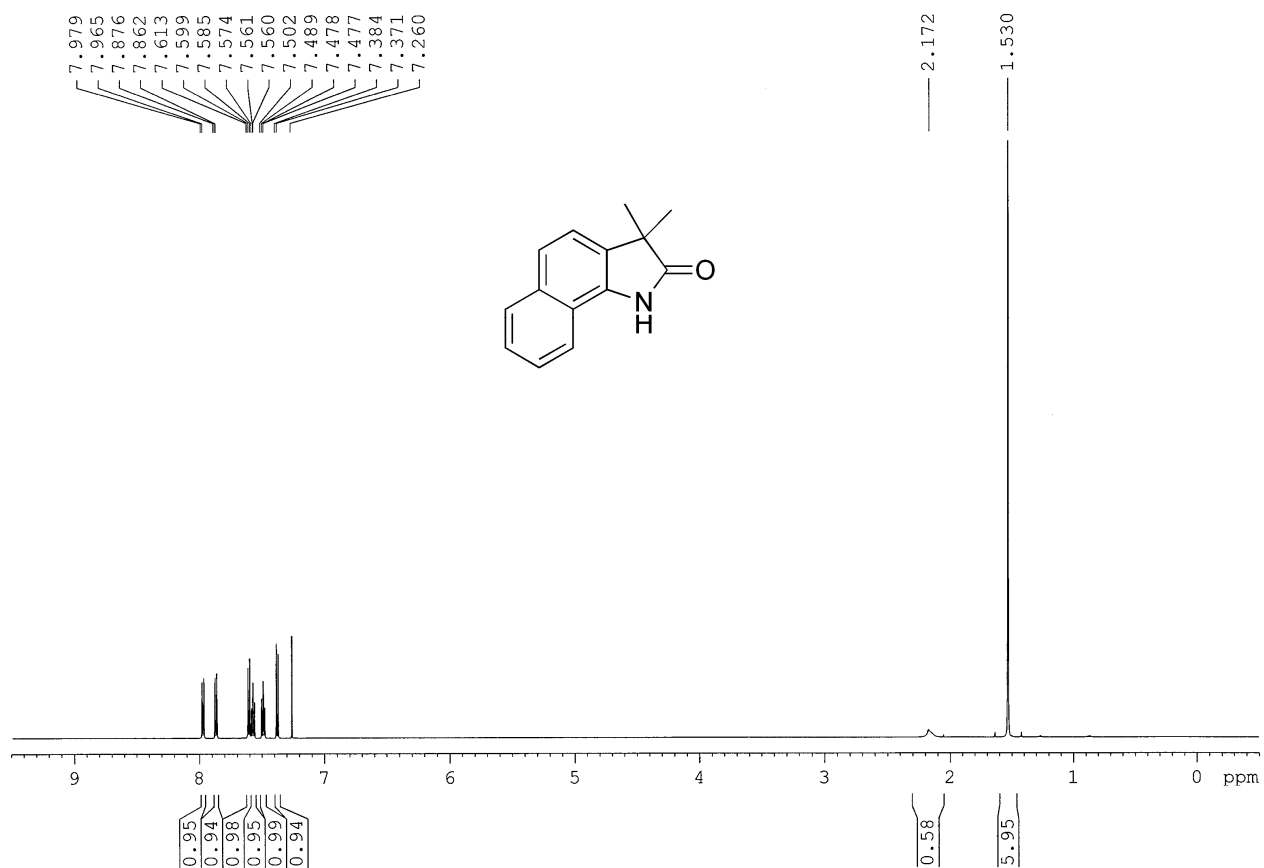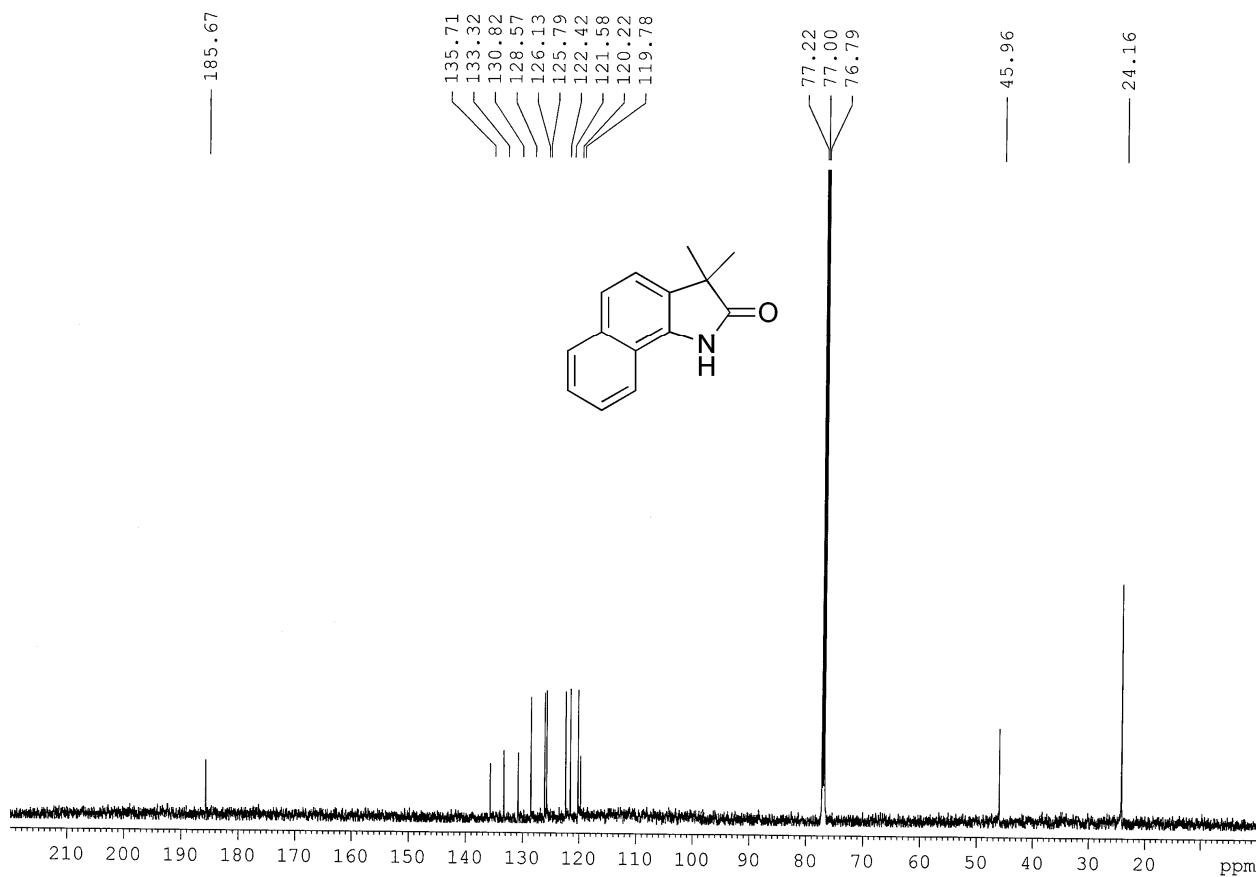



**3,3-Dimethyl-1*H*-pyrrolo[2,3-*b*]pyridin-2(3*H*)-one (2j)**

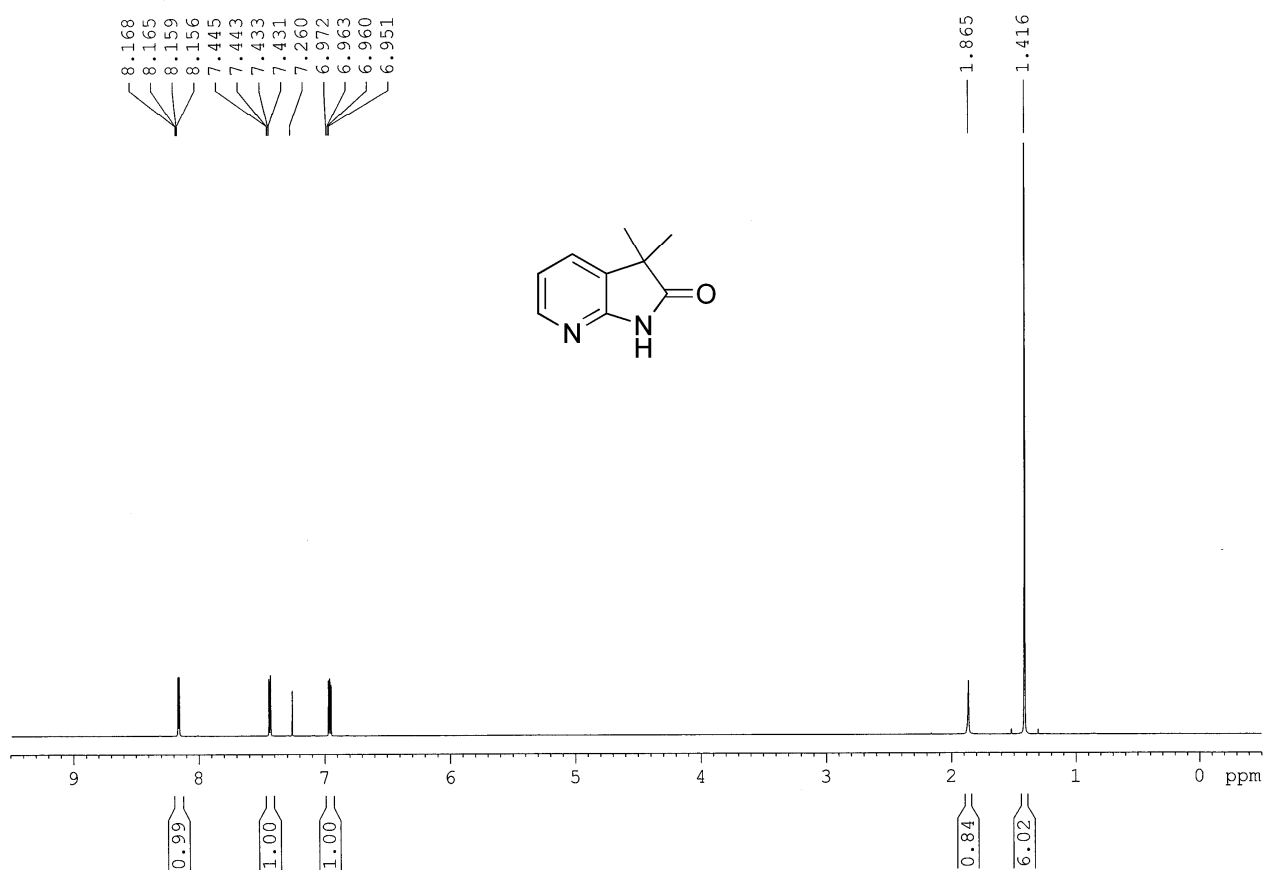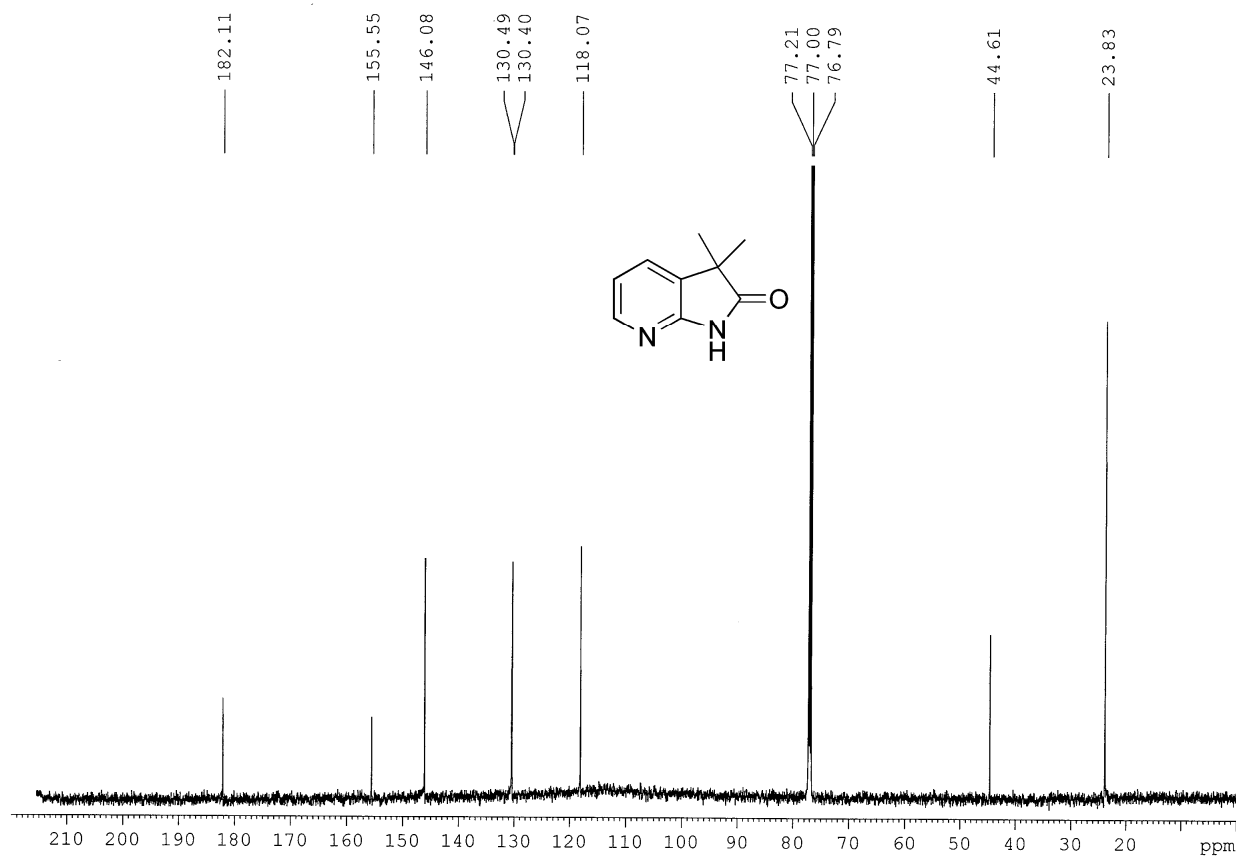

3,3-Diethylindolin-2-one (2k)

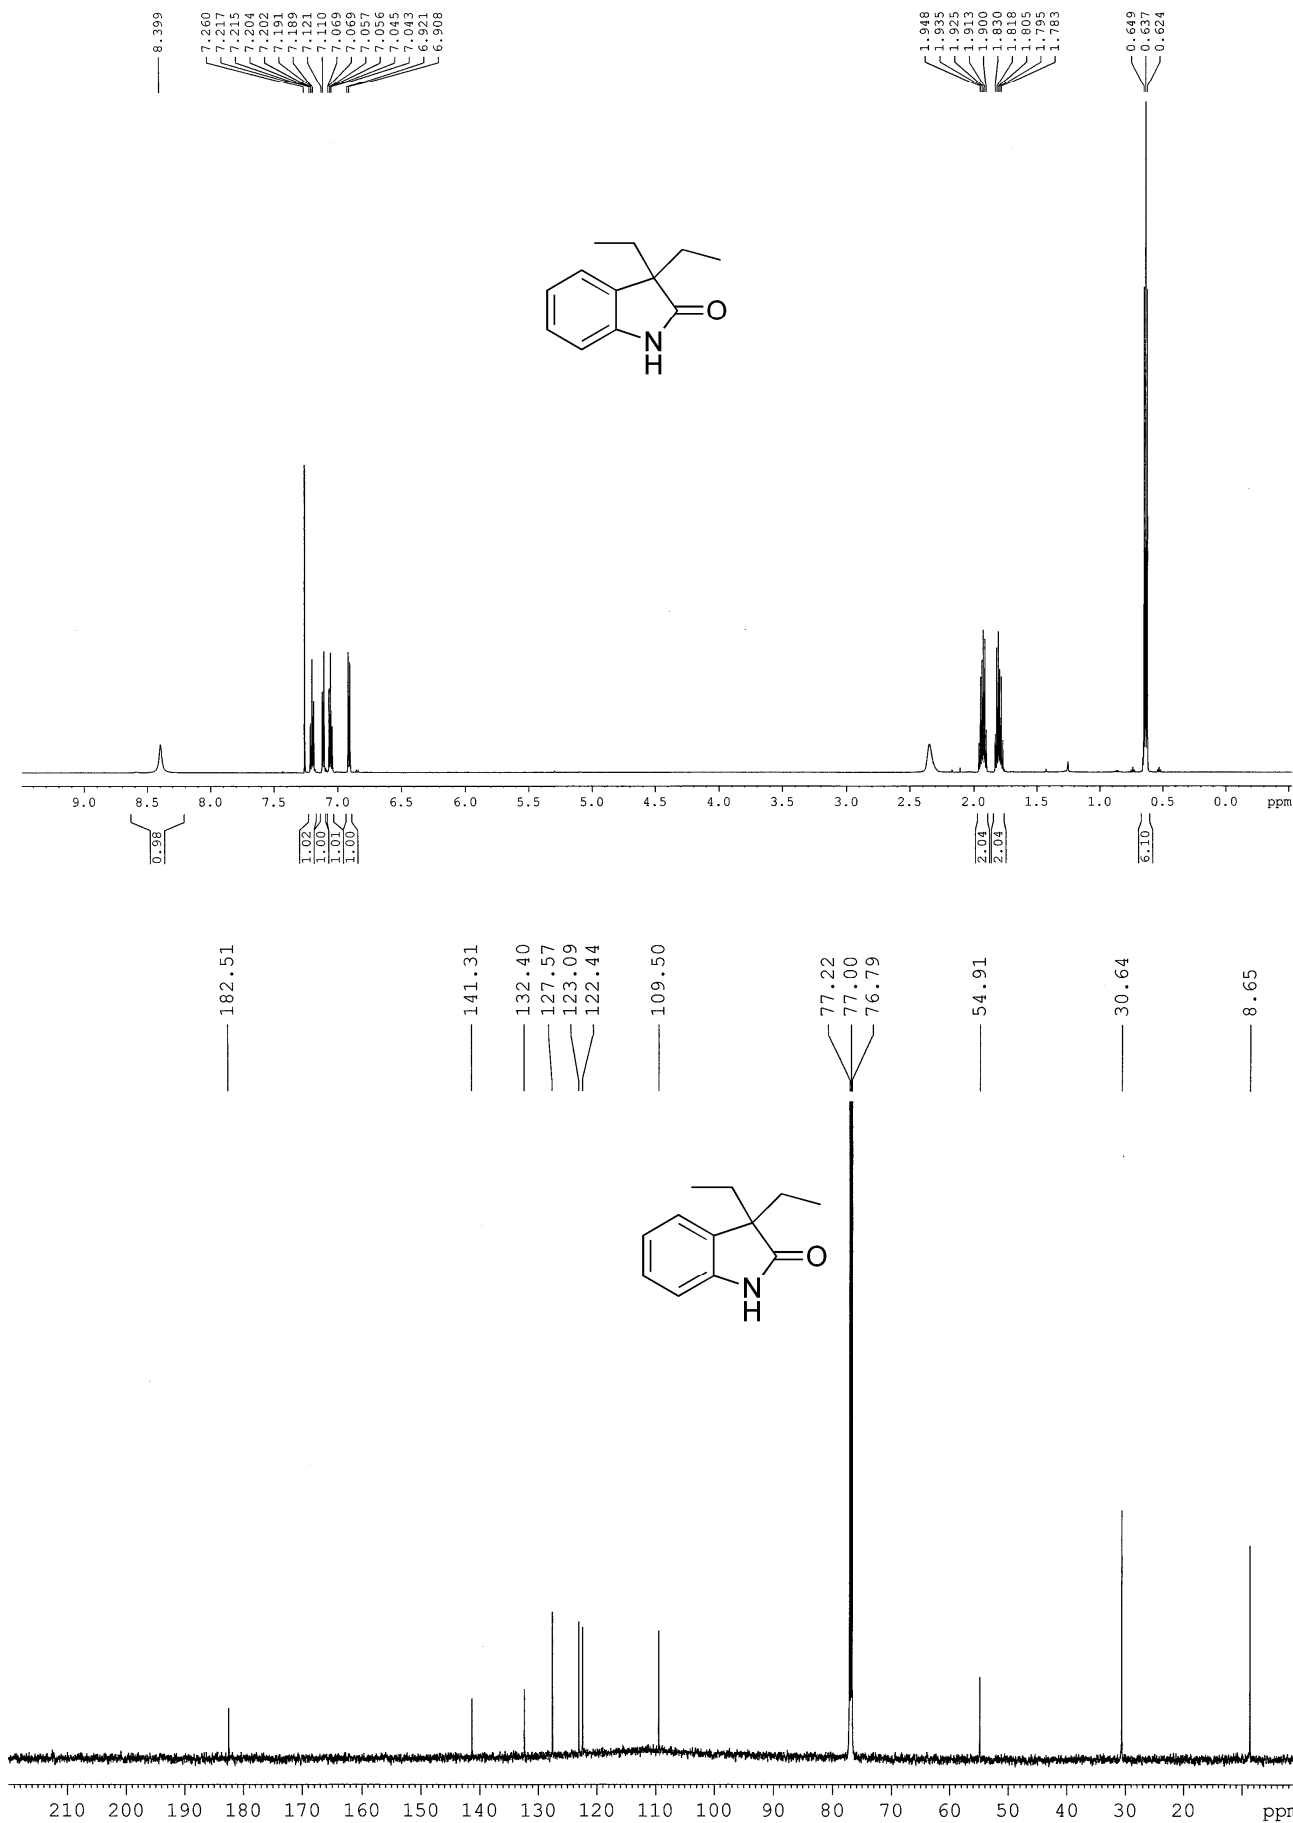

### 3,3-Dibenzylindolin-2-one (2l)

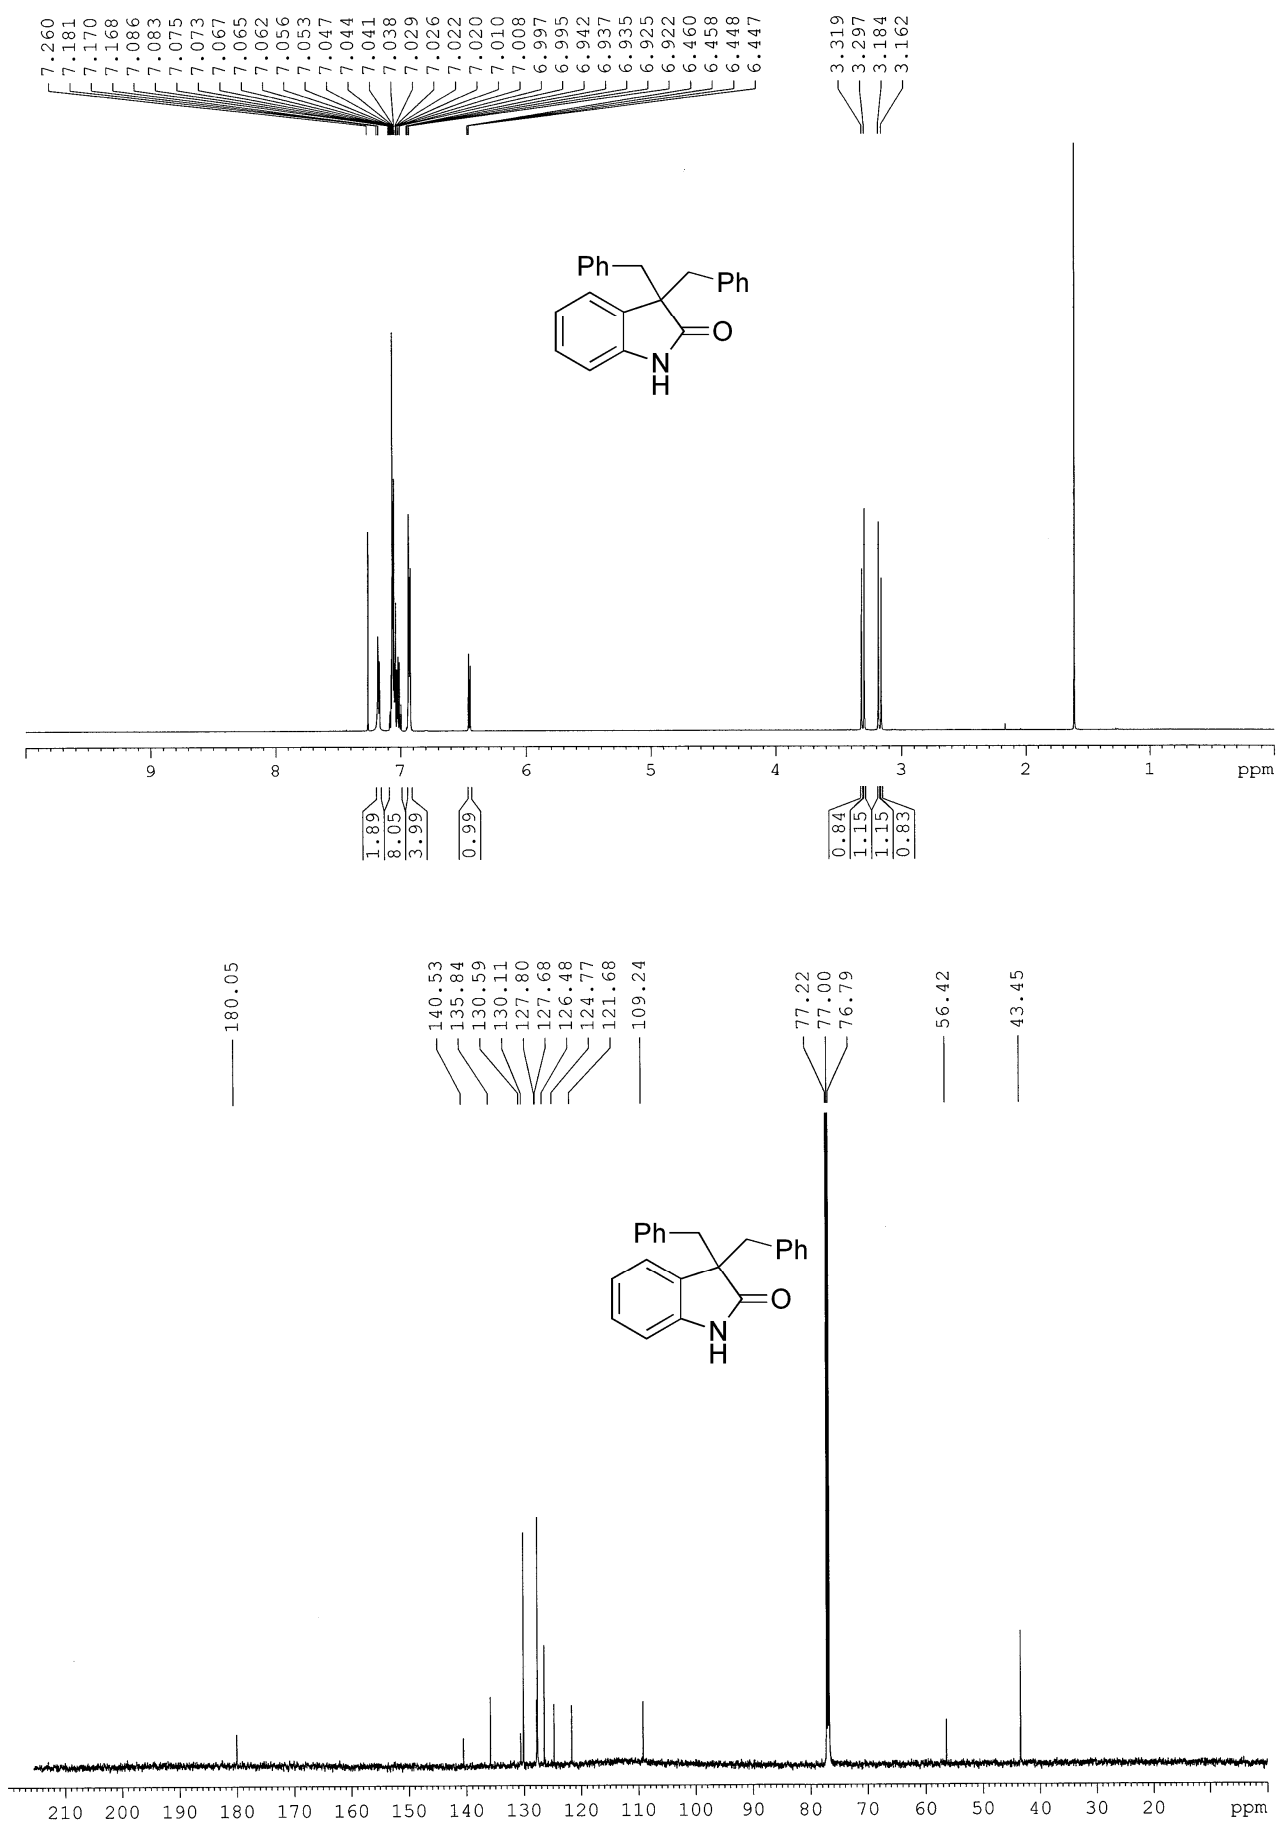

### 3-Ethyl-3-methoxyindolin-2-one (2m)

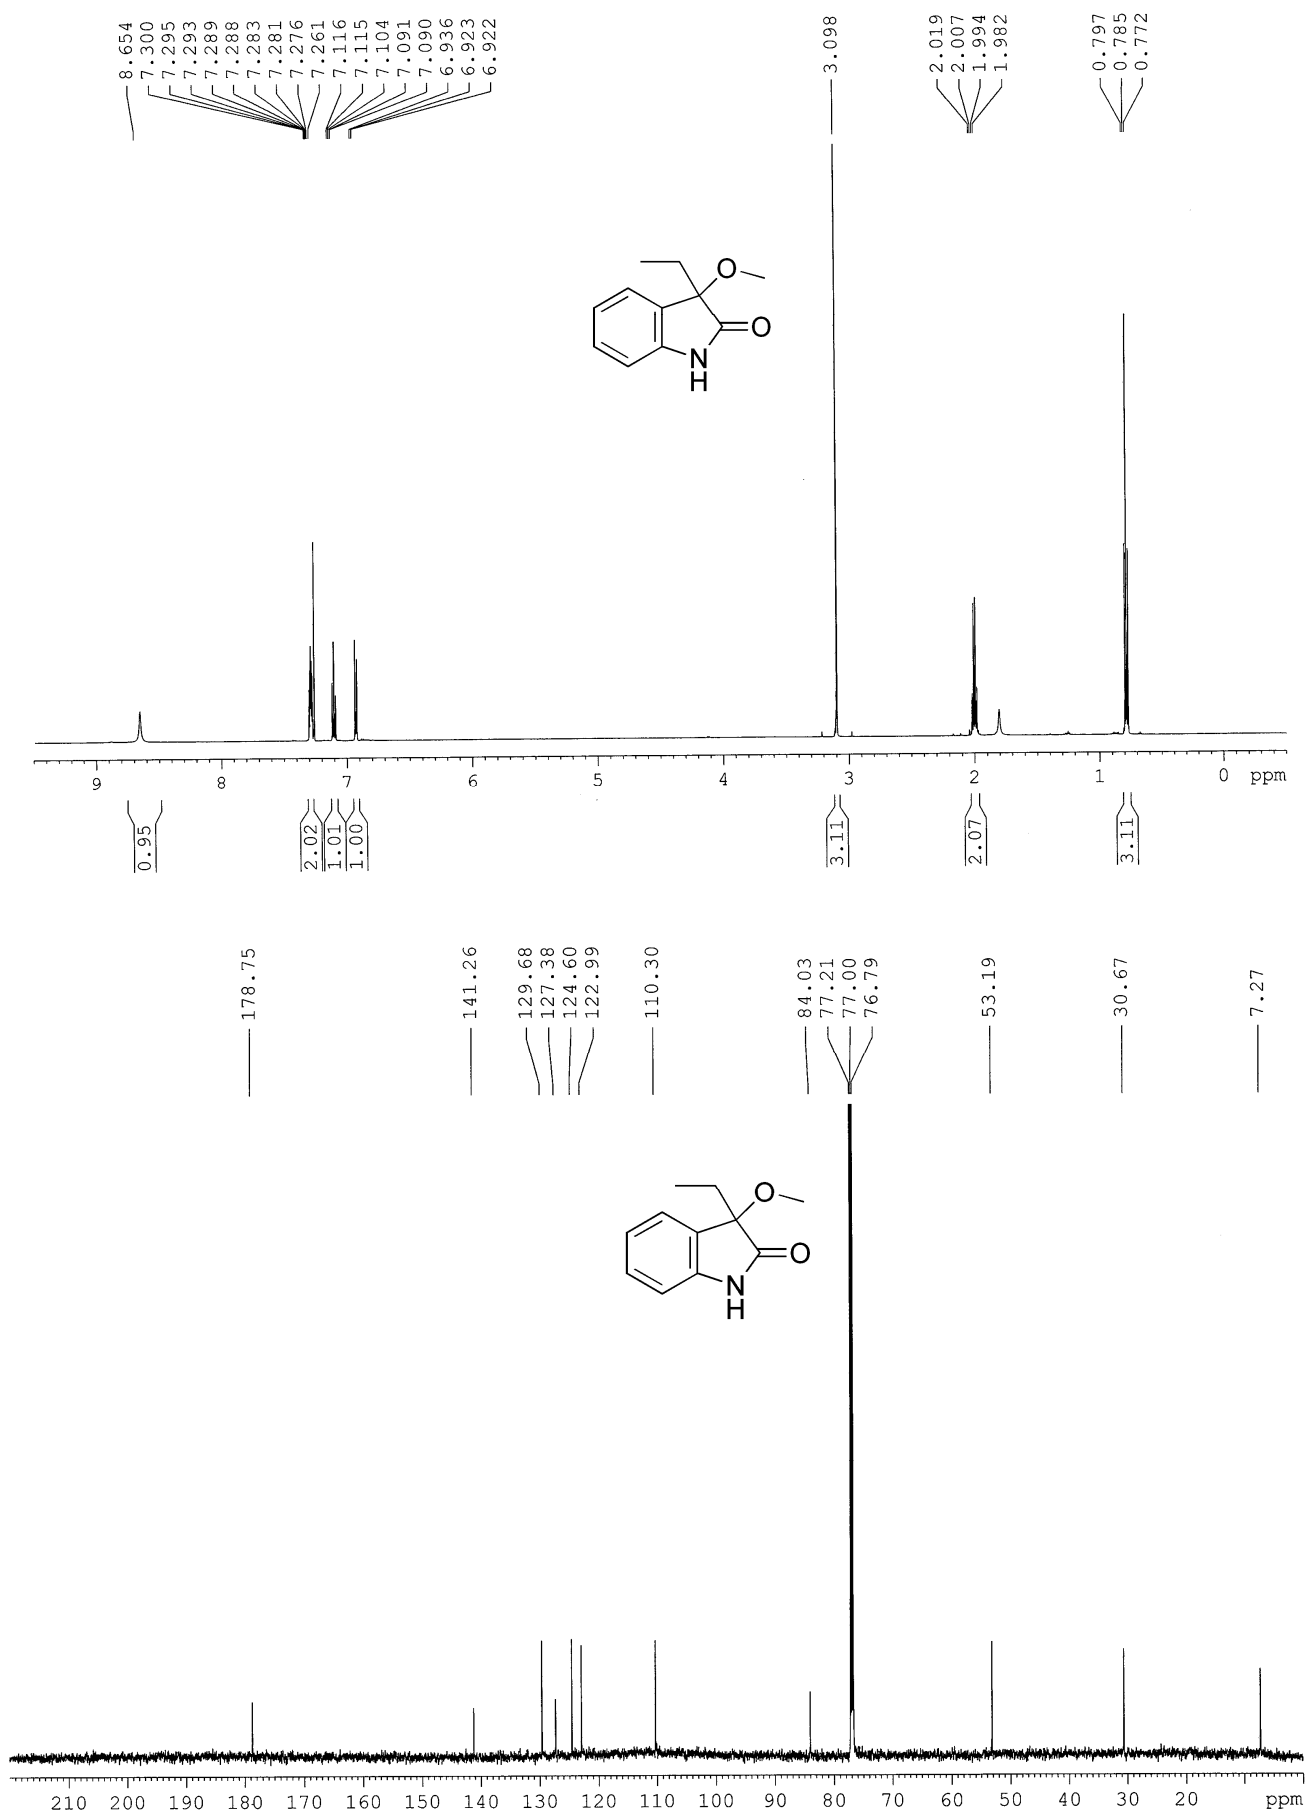

### 3-Ethyl-3-isopropoxyindolin-2-one (2n)

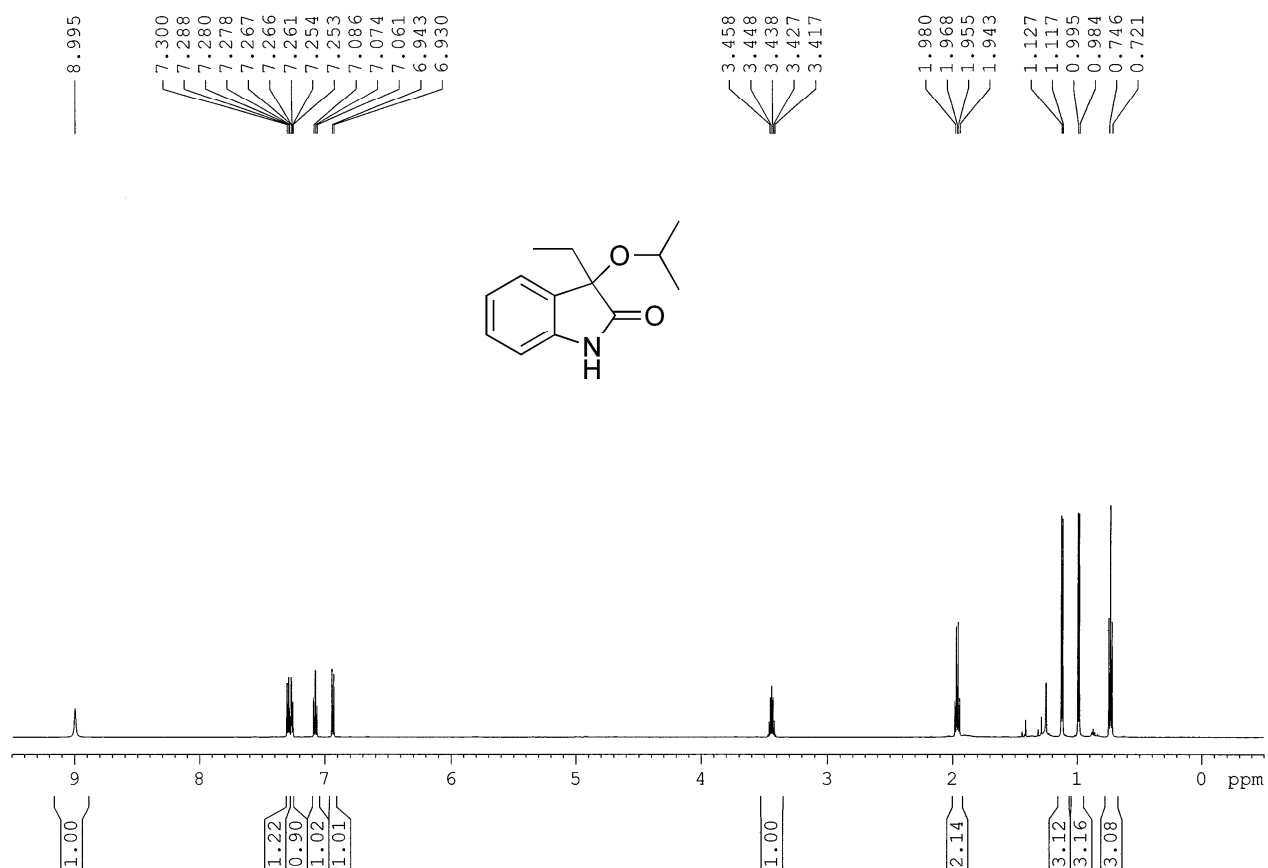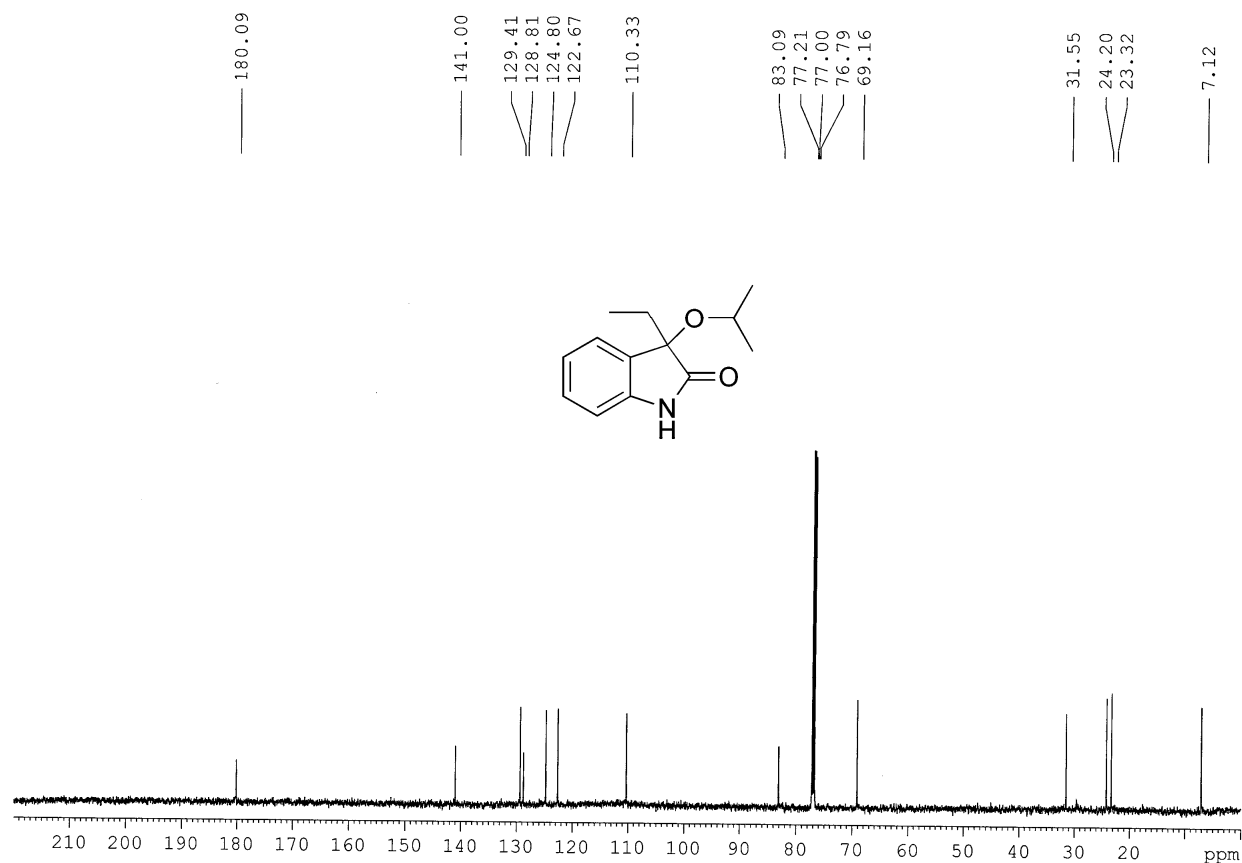

### 3-Ethyl-3-phenoxyindolin-2-one (2o)

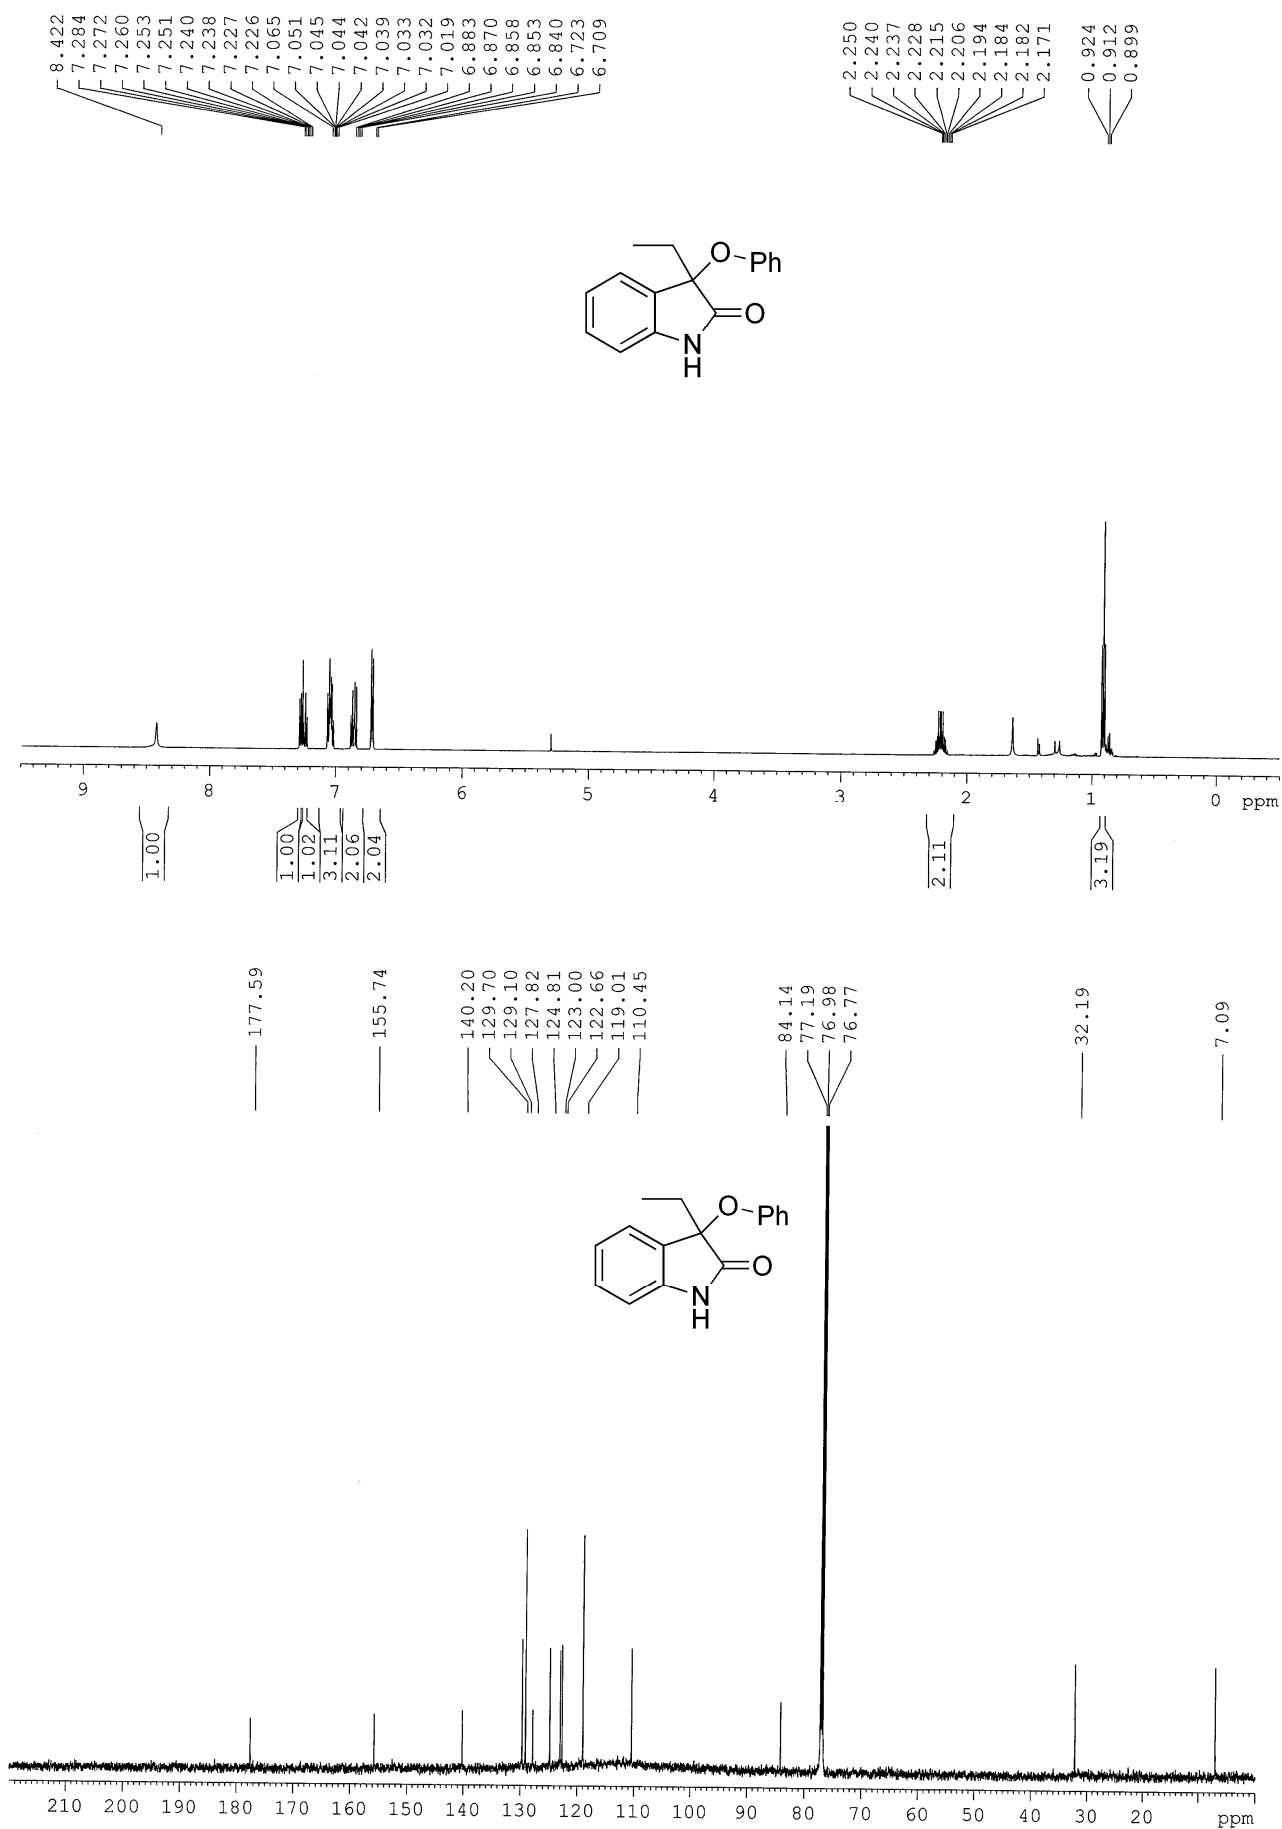

### 3-Ethyl-3-(phenylthio)indolin-2-one (2p)

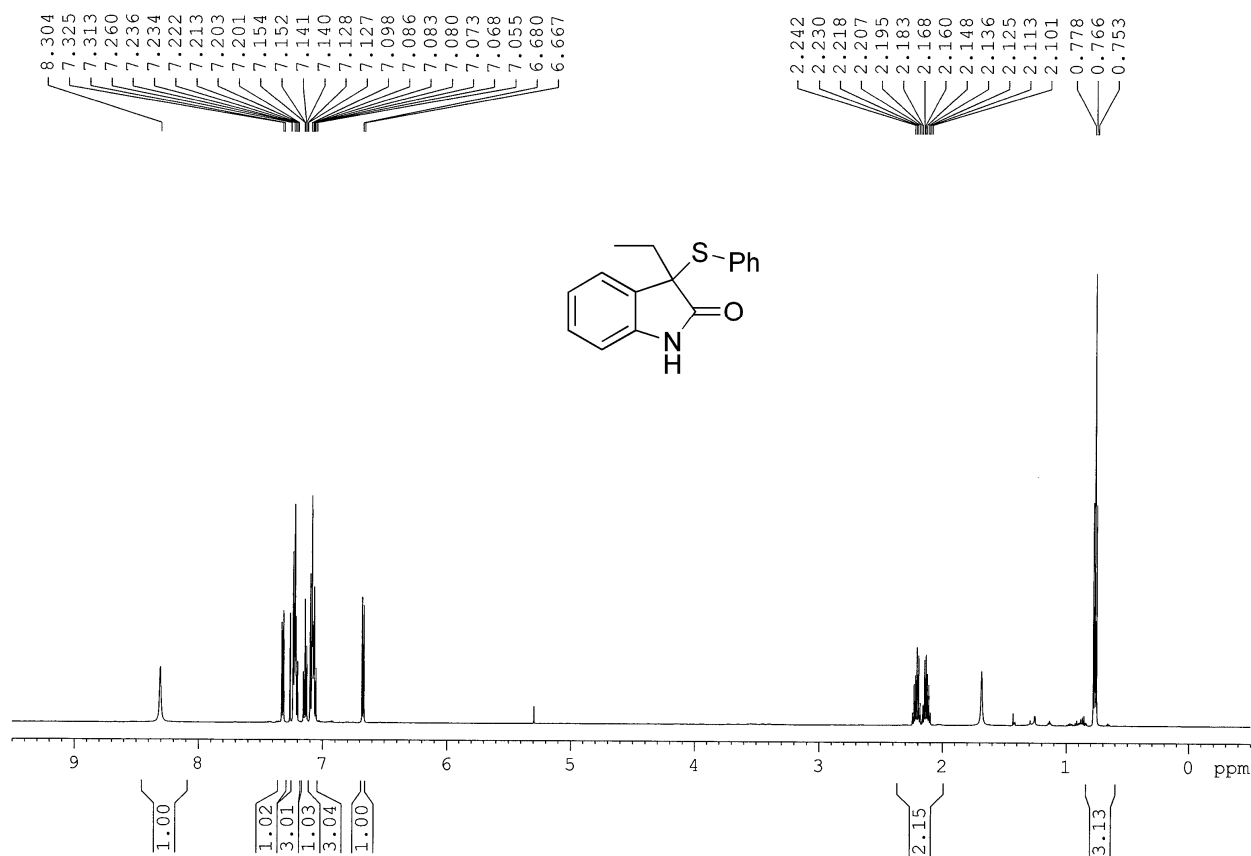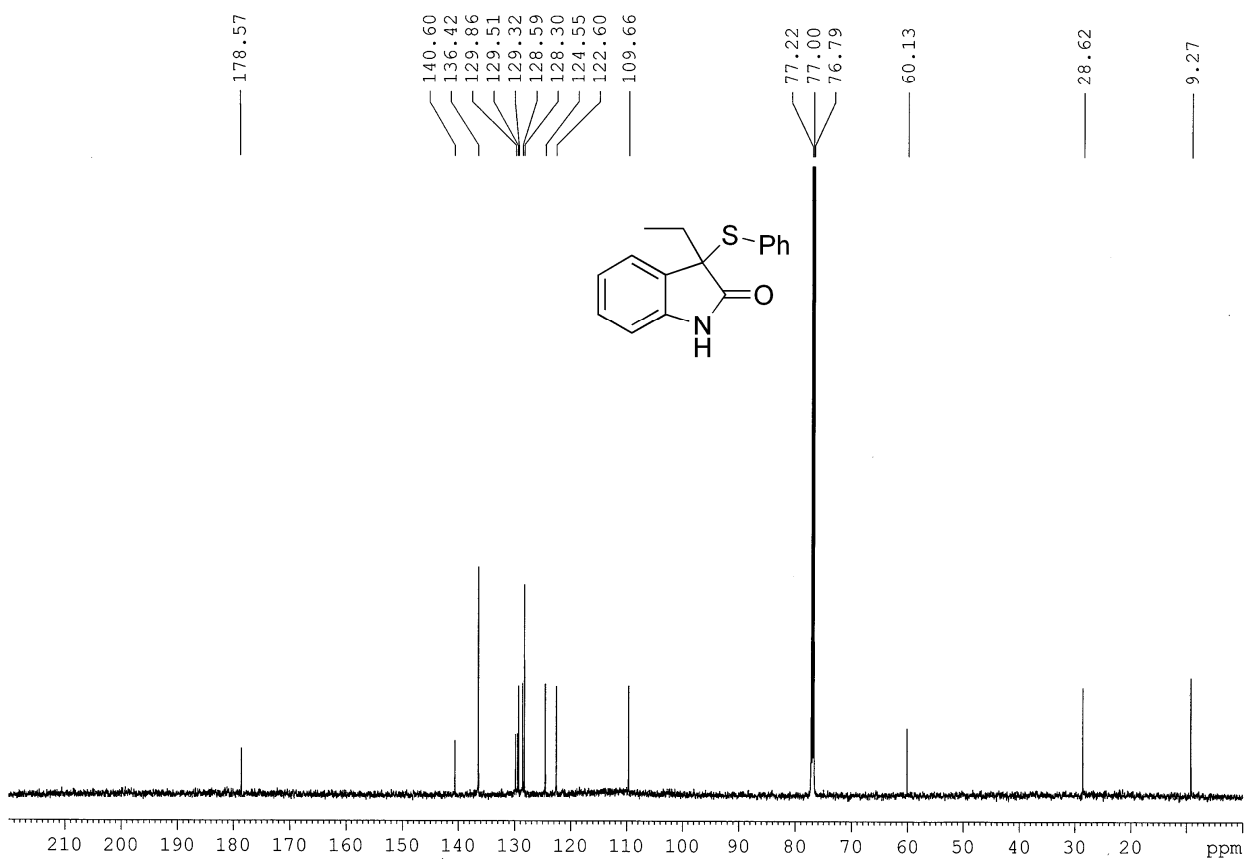

# **Spiro[cyclopentane-1,3'-indolin]-2'-one (2q)**

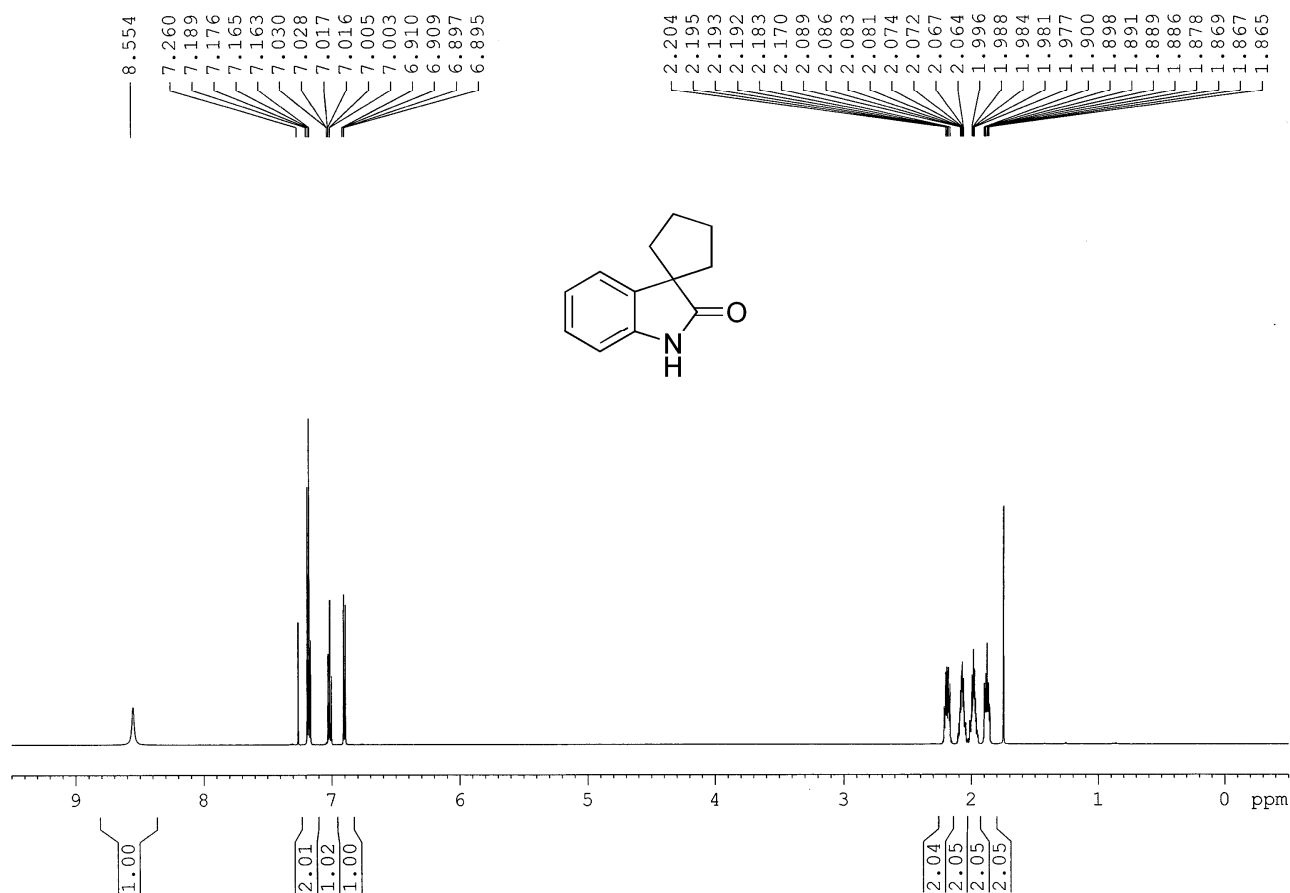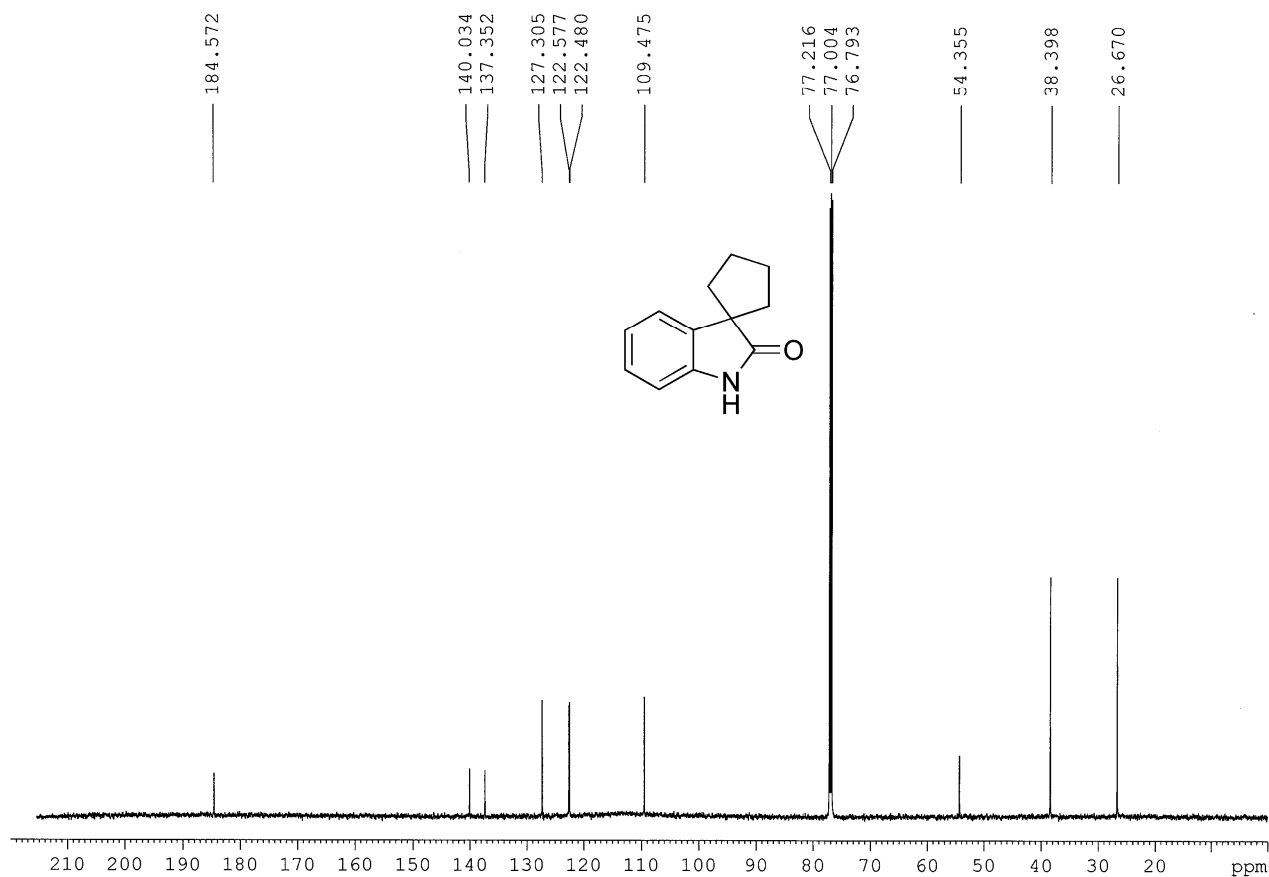



**Spiro[cyclohexane-1,3'-indolin]-2'-one (2r)**

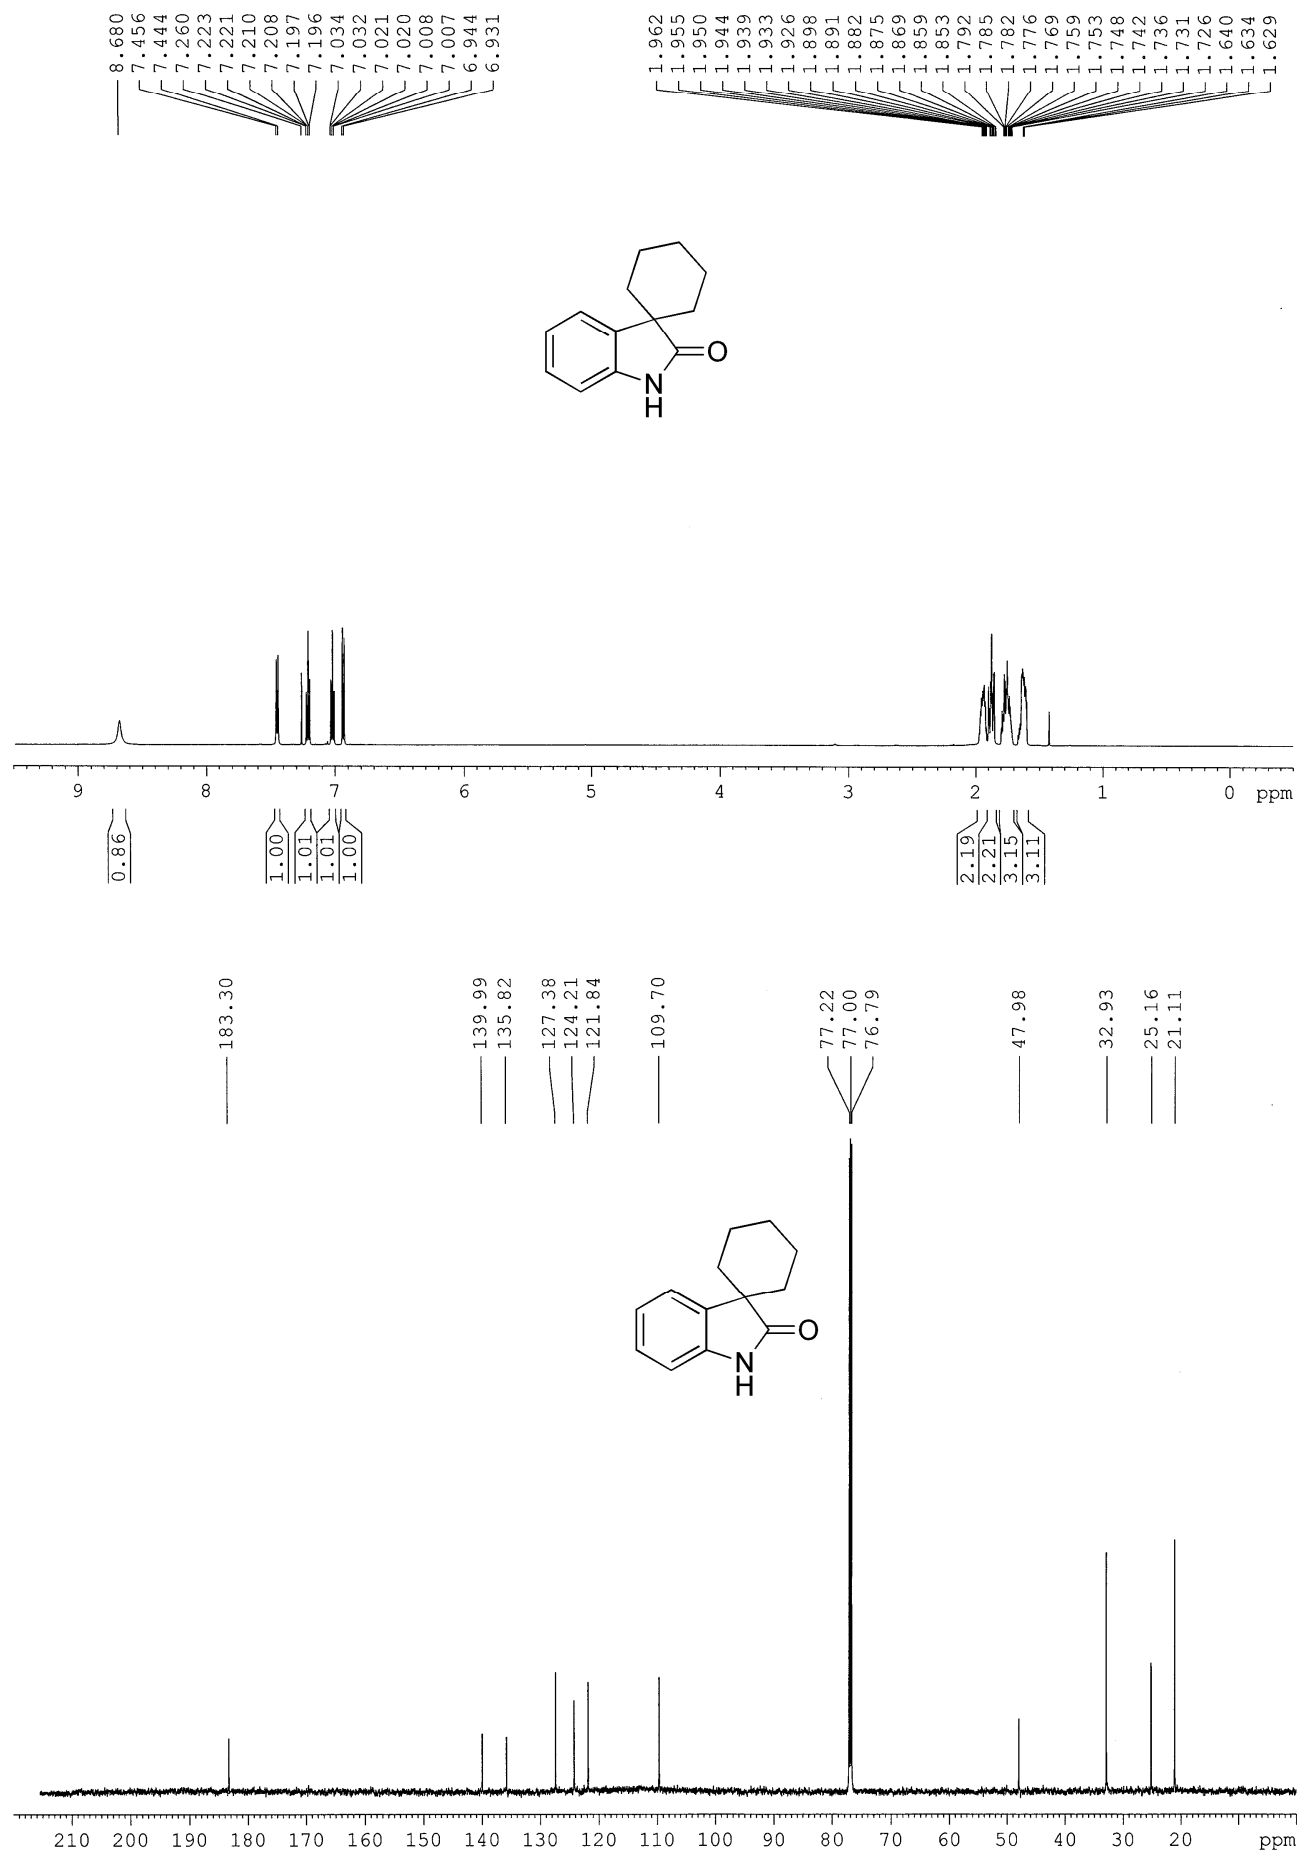

# **2',3',5',6'-Tetrahydrospiro[indoline-3,4'-pyran]-2-one (2s)**

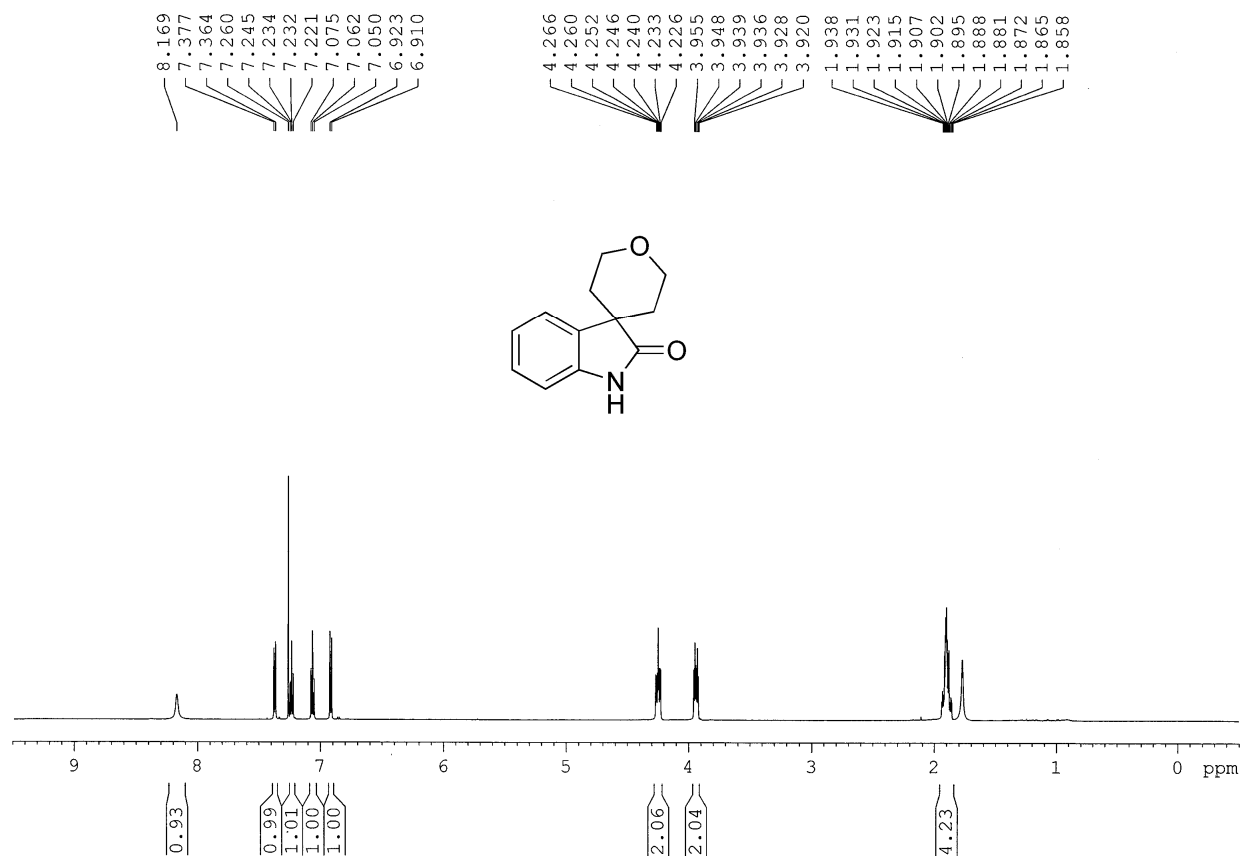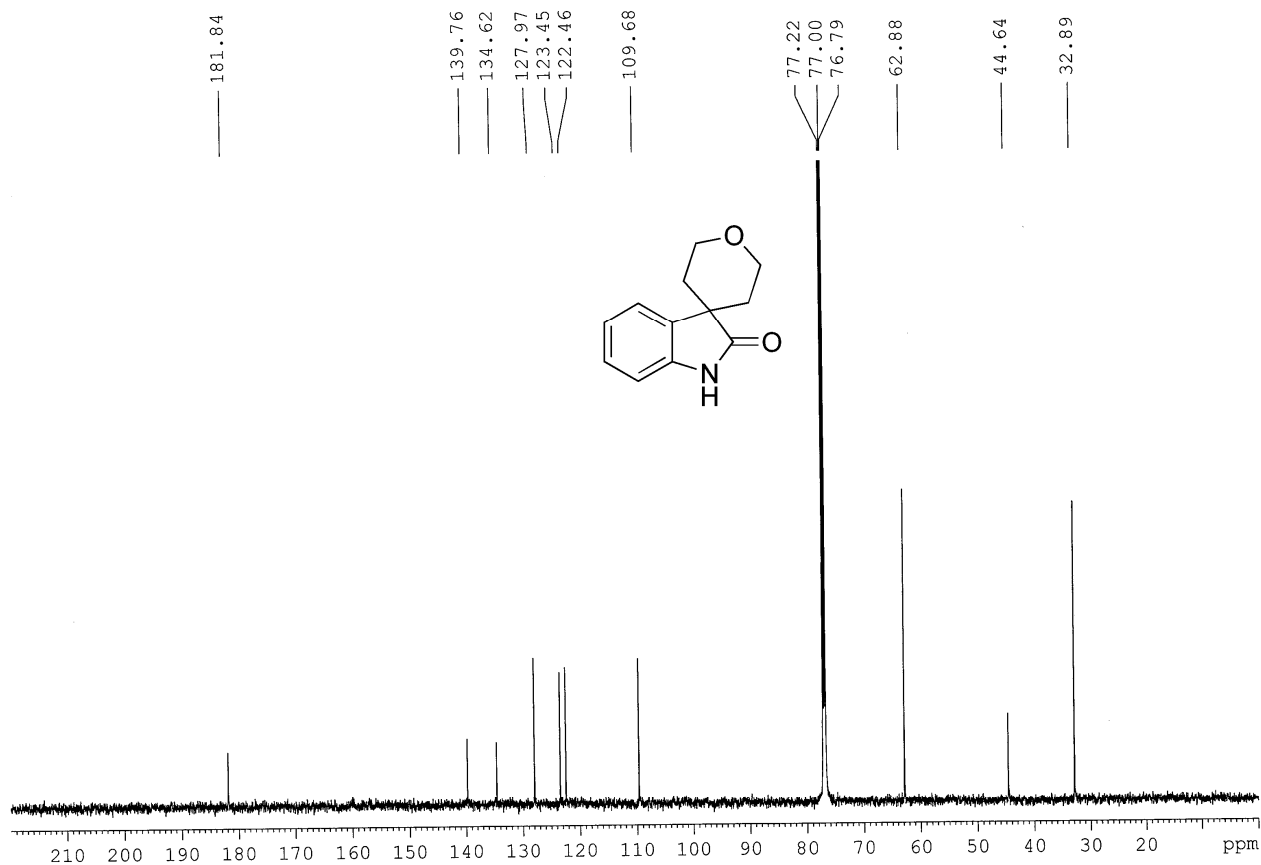

**Dispiro[1,3-dioxolane-2,1'-cyclohexane-4',3''-[3H]indol]-2''(1''H)-one (2t)**

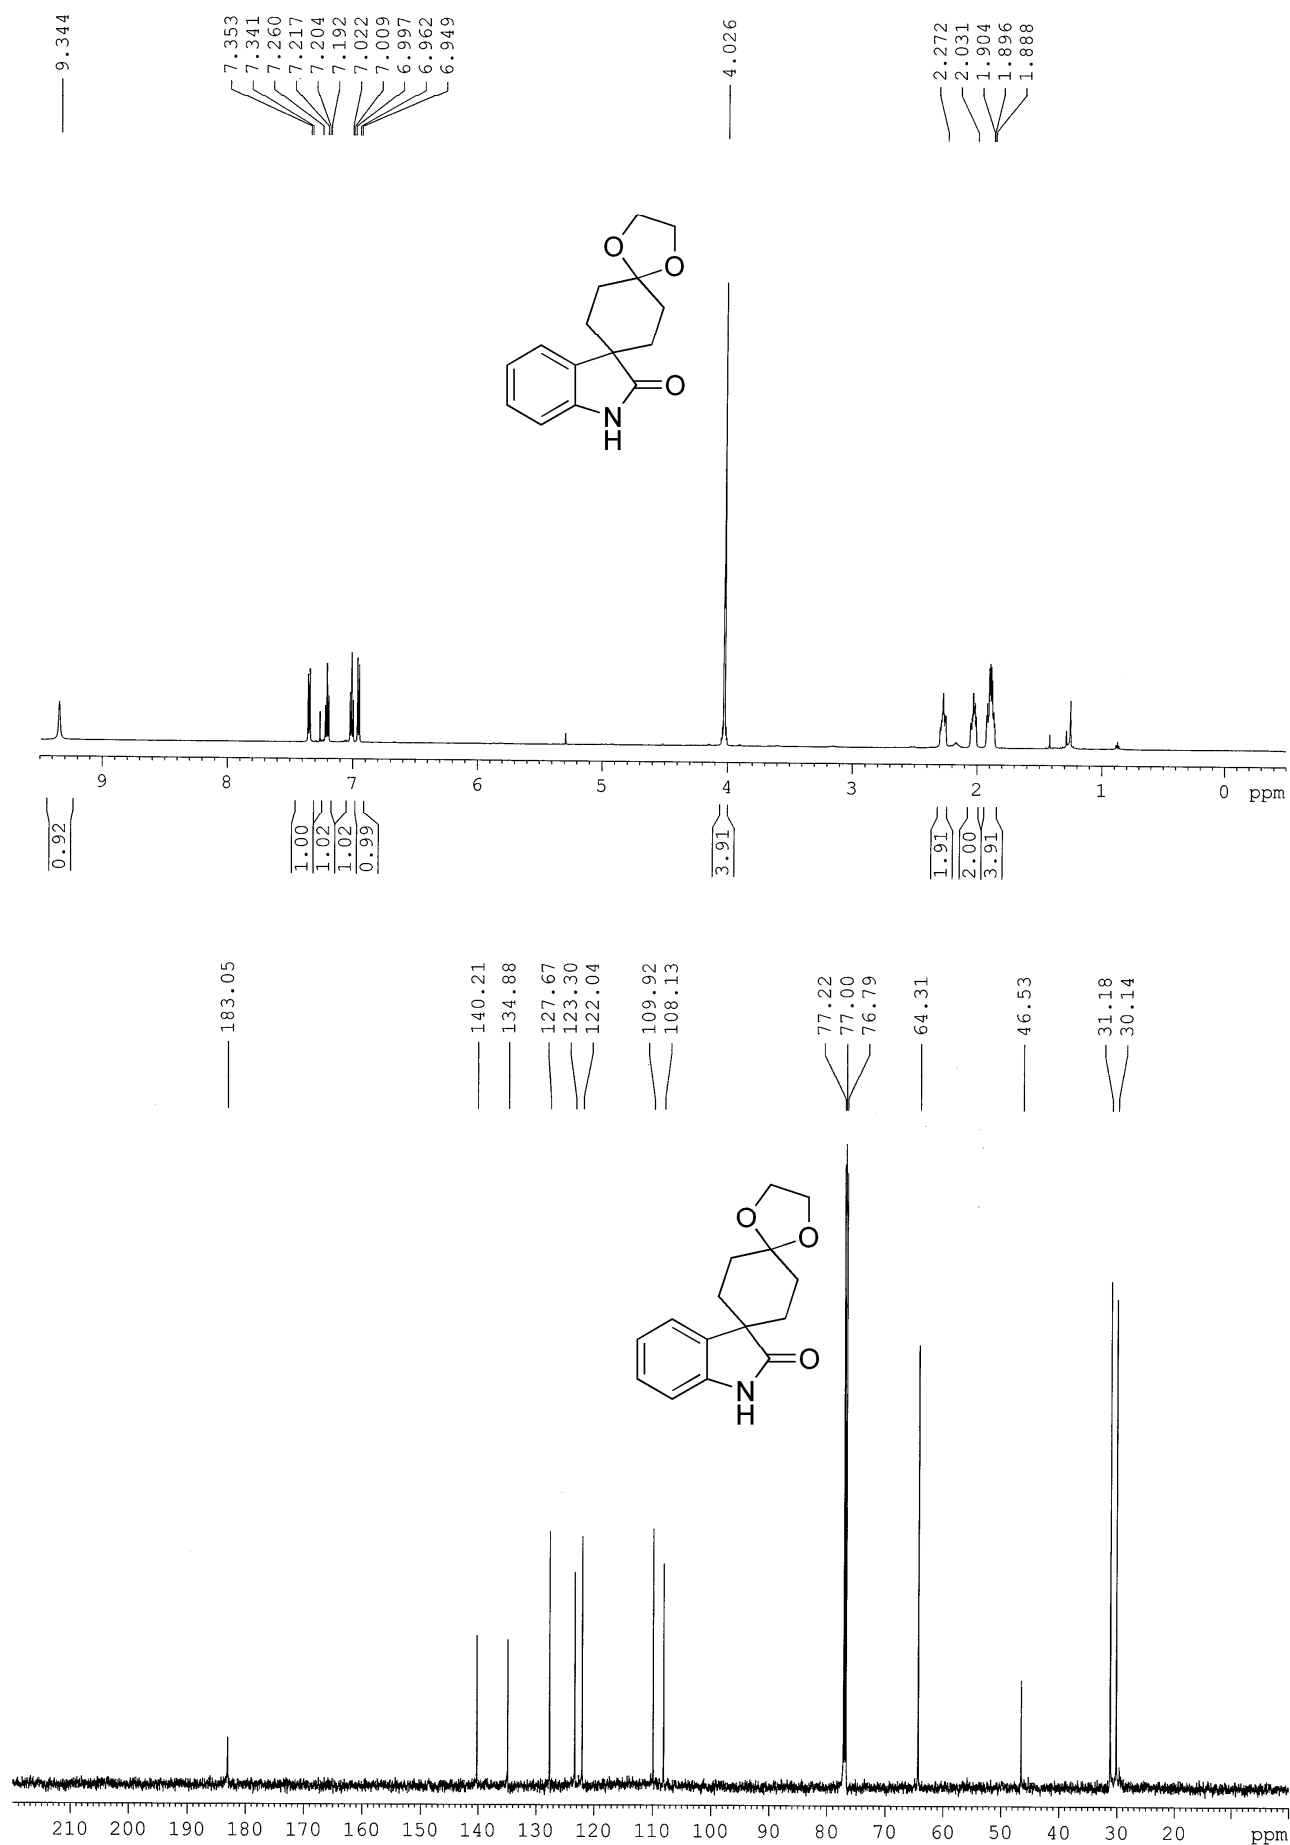

# 1,3-Dihydrospiro[indene-2,3'-indolin]-2'-one (2u)

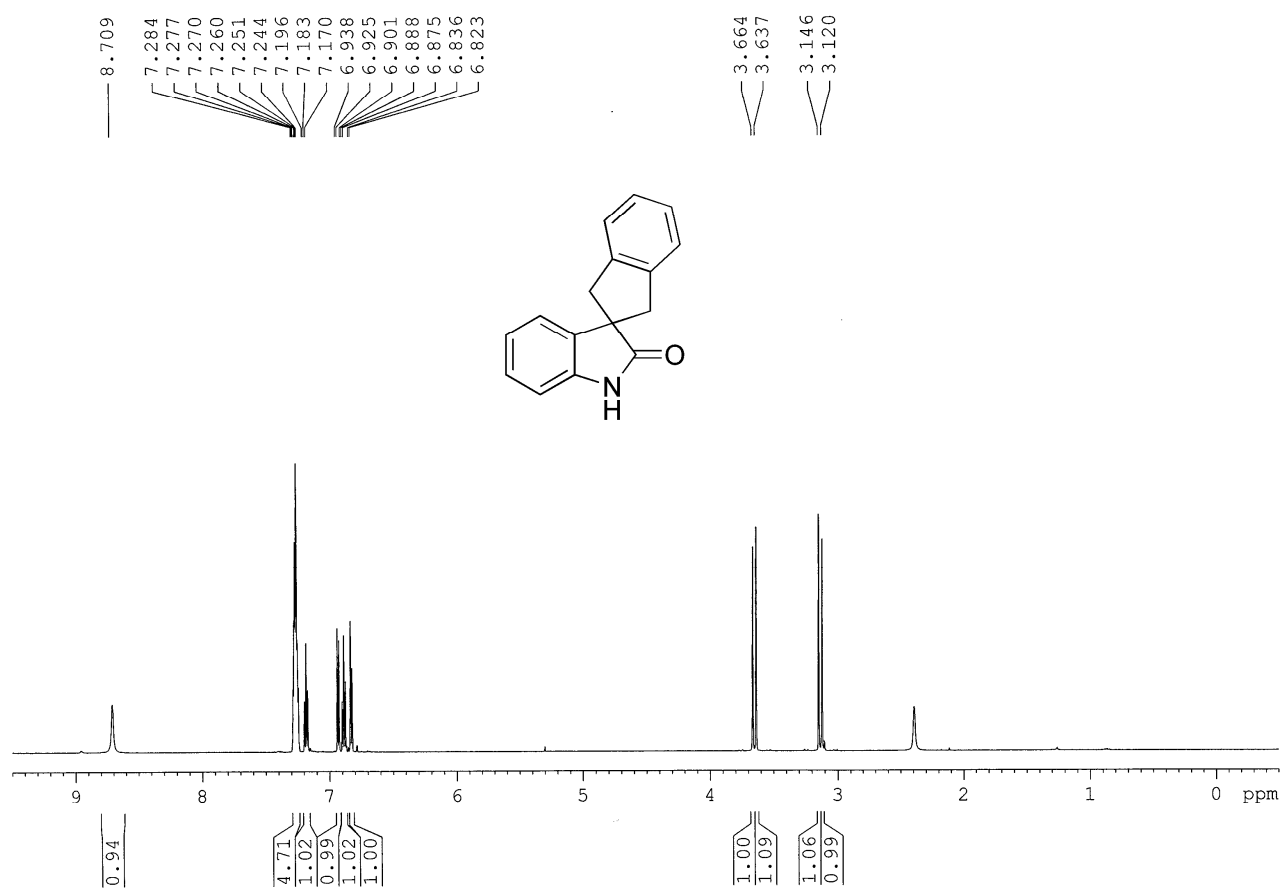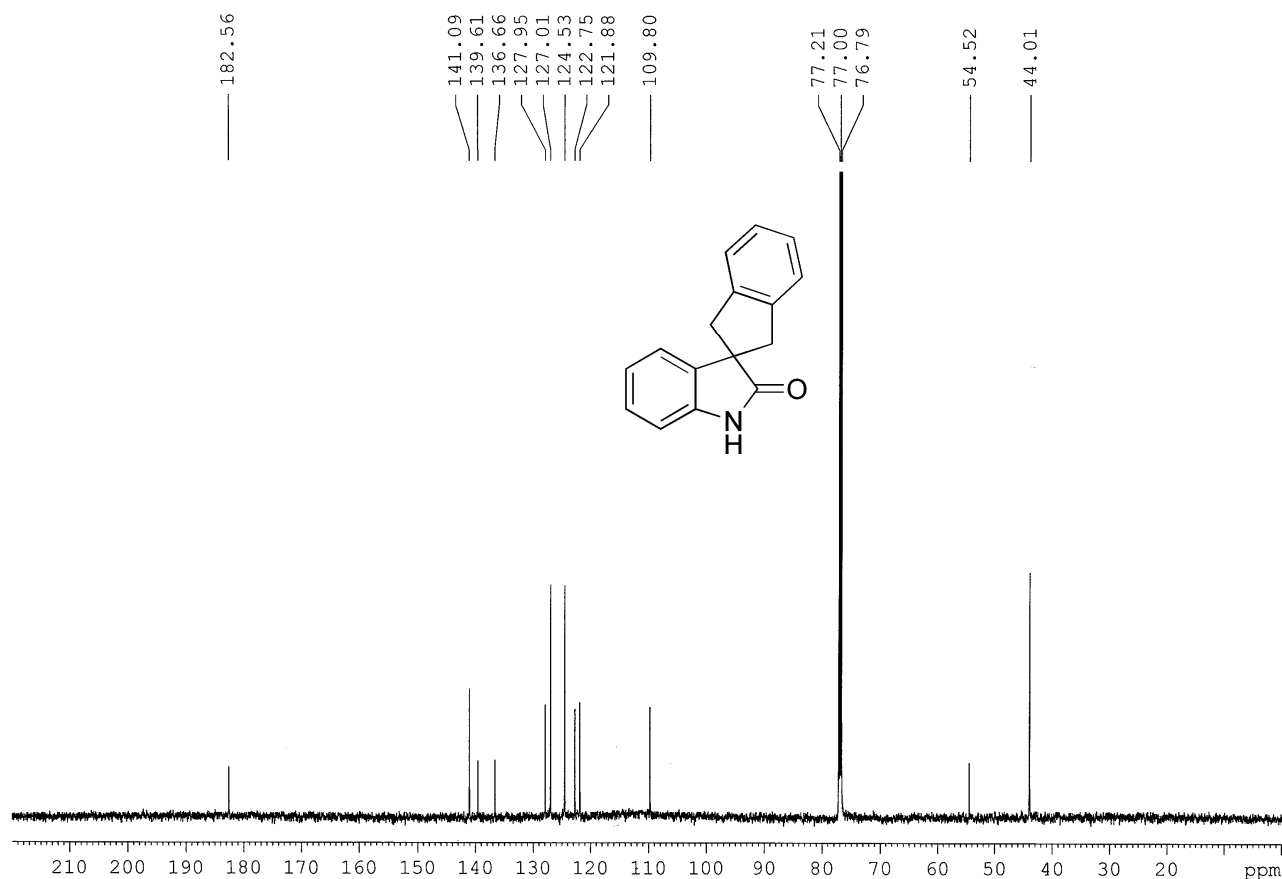

### 3-Cyclohexylideneindolin-2-one (2v)

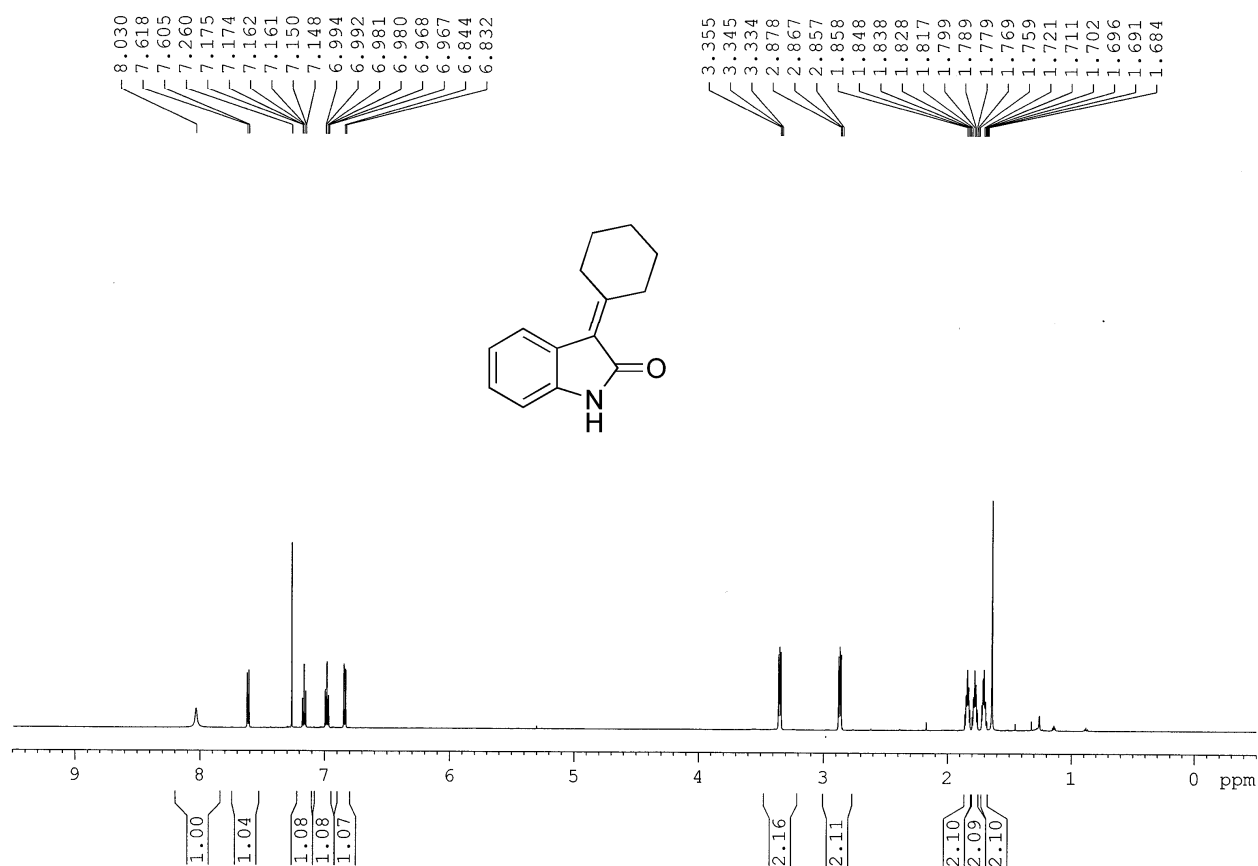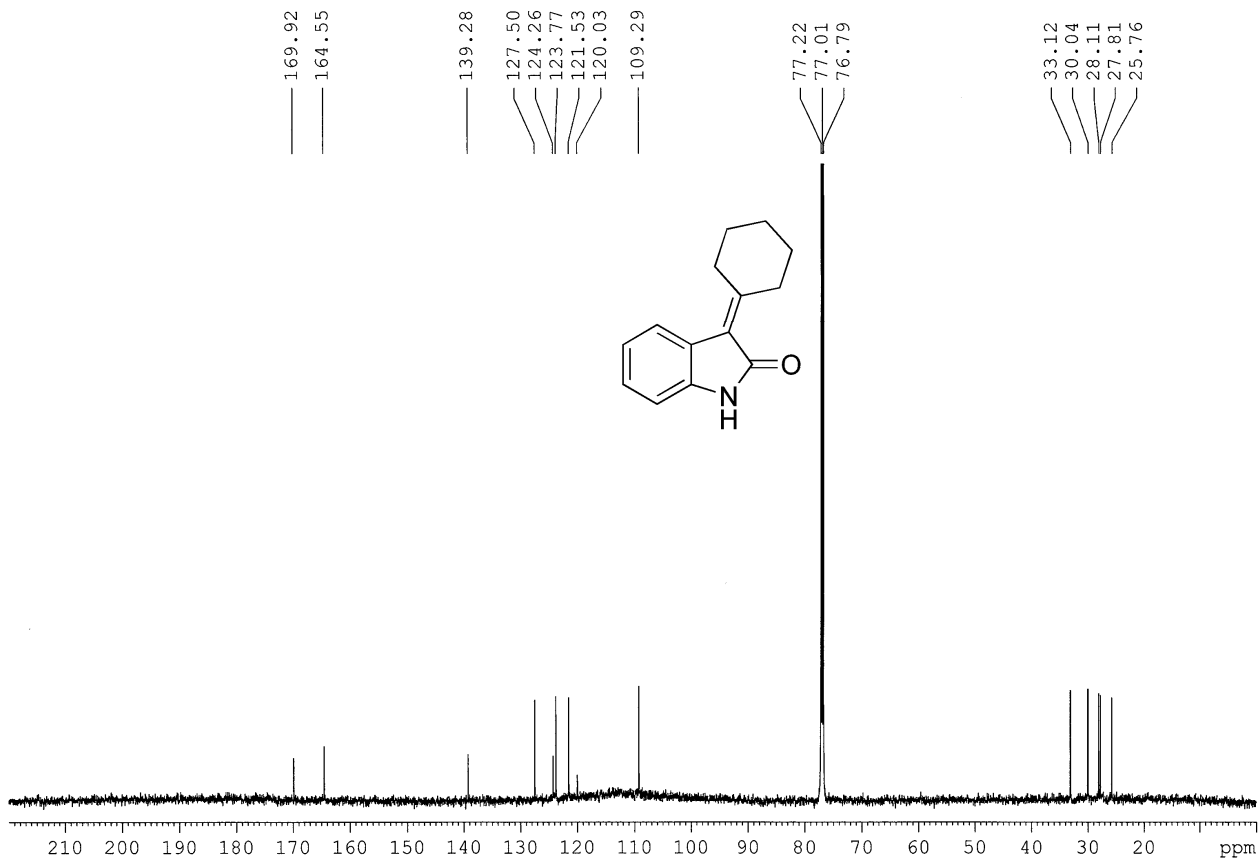

**3,3-Dimethyl-3,4-dihydroquinolin-2(1H)-one (2y)**

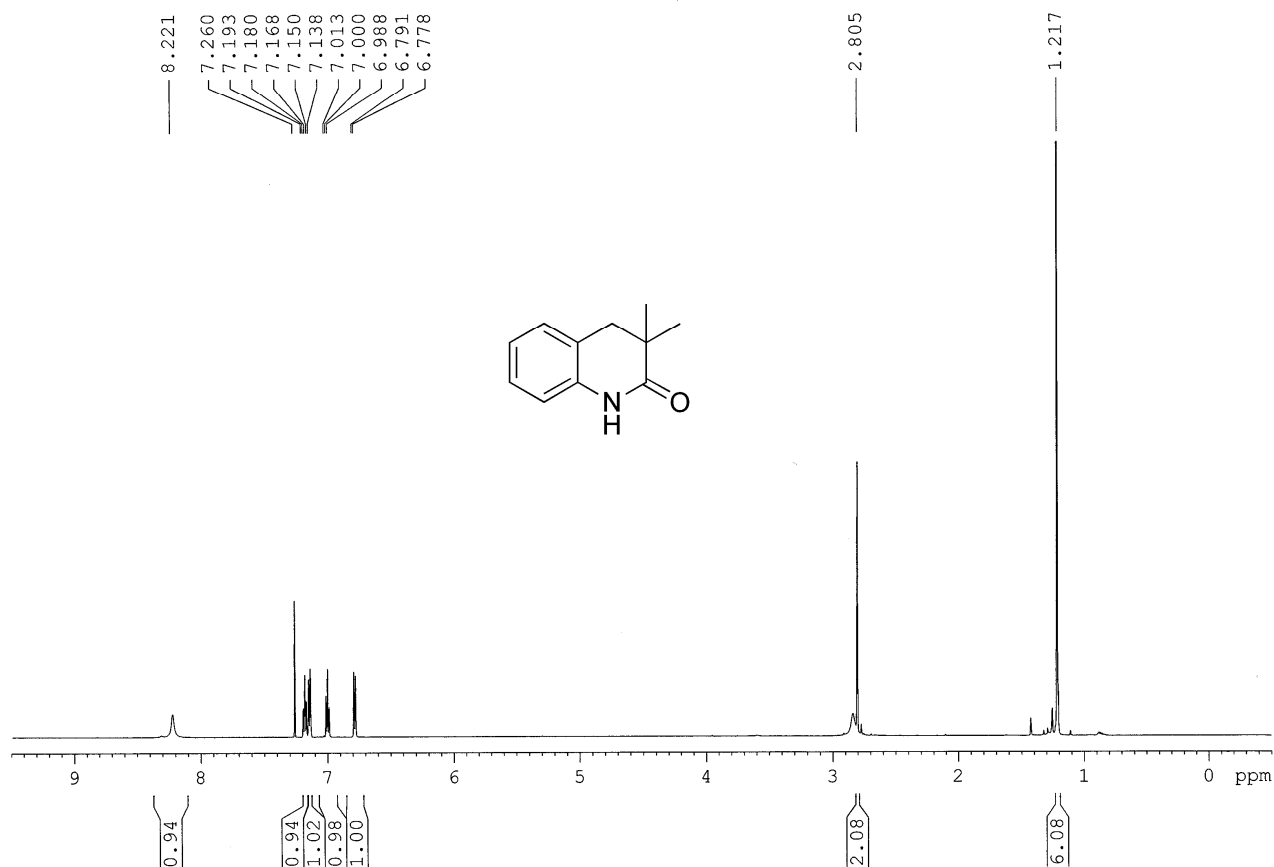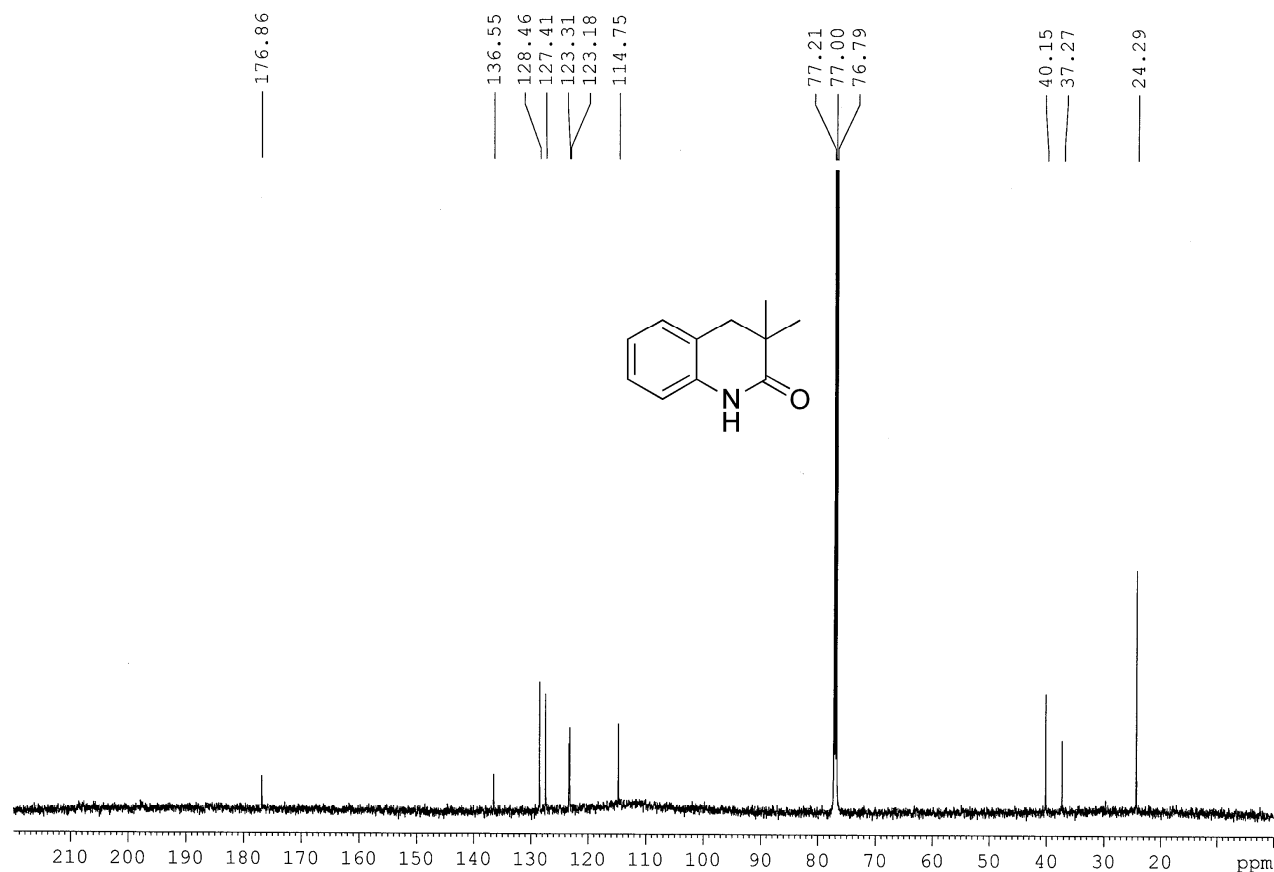

**5-Chloroindolin-2-one (2w, 300 MHz, CDCl<sub>3</sub>)**

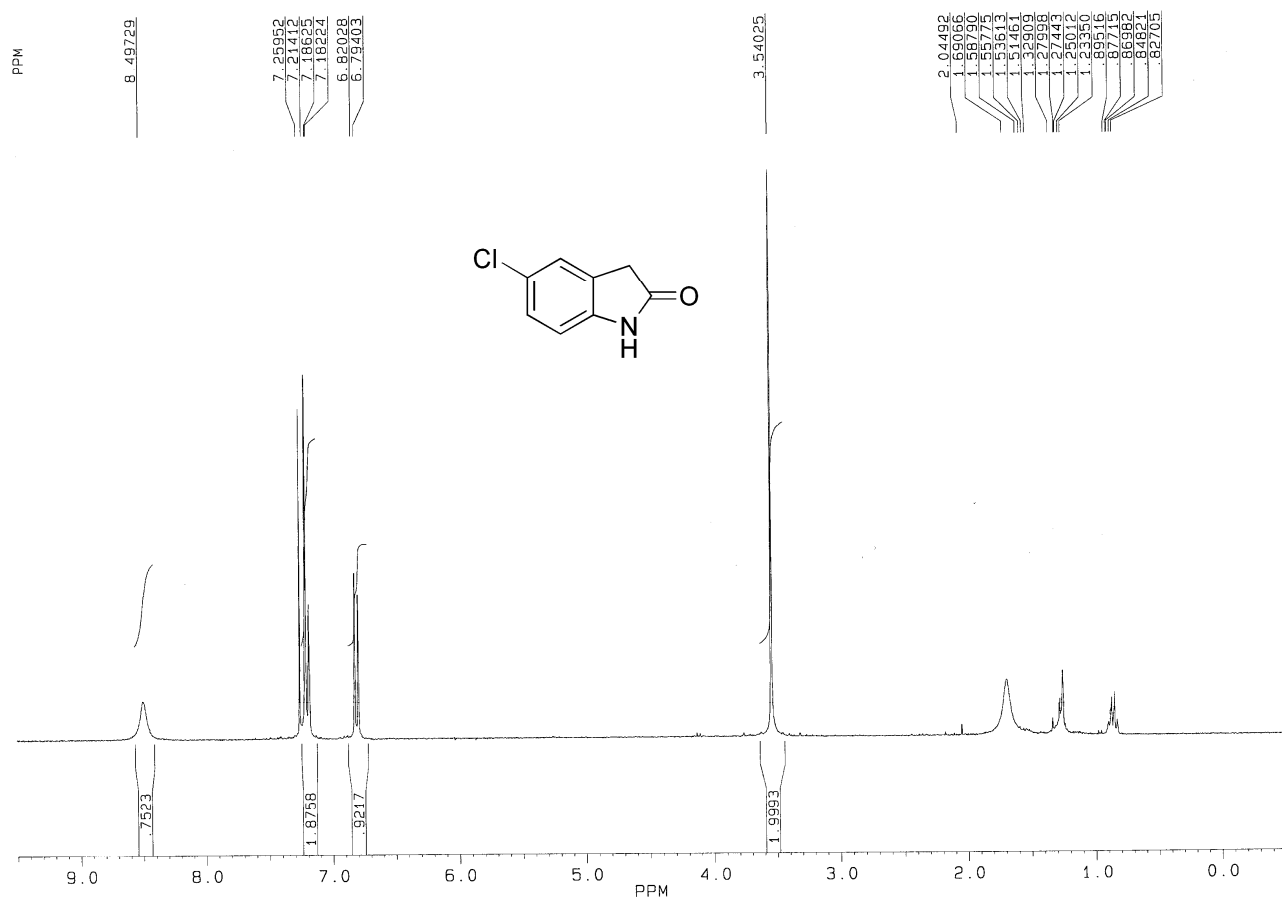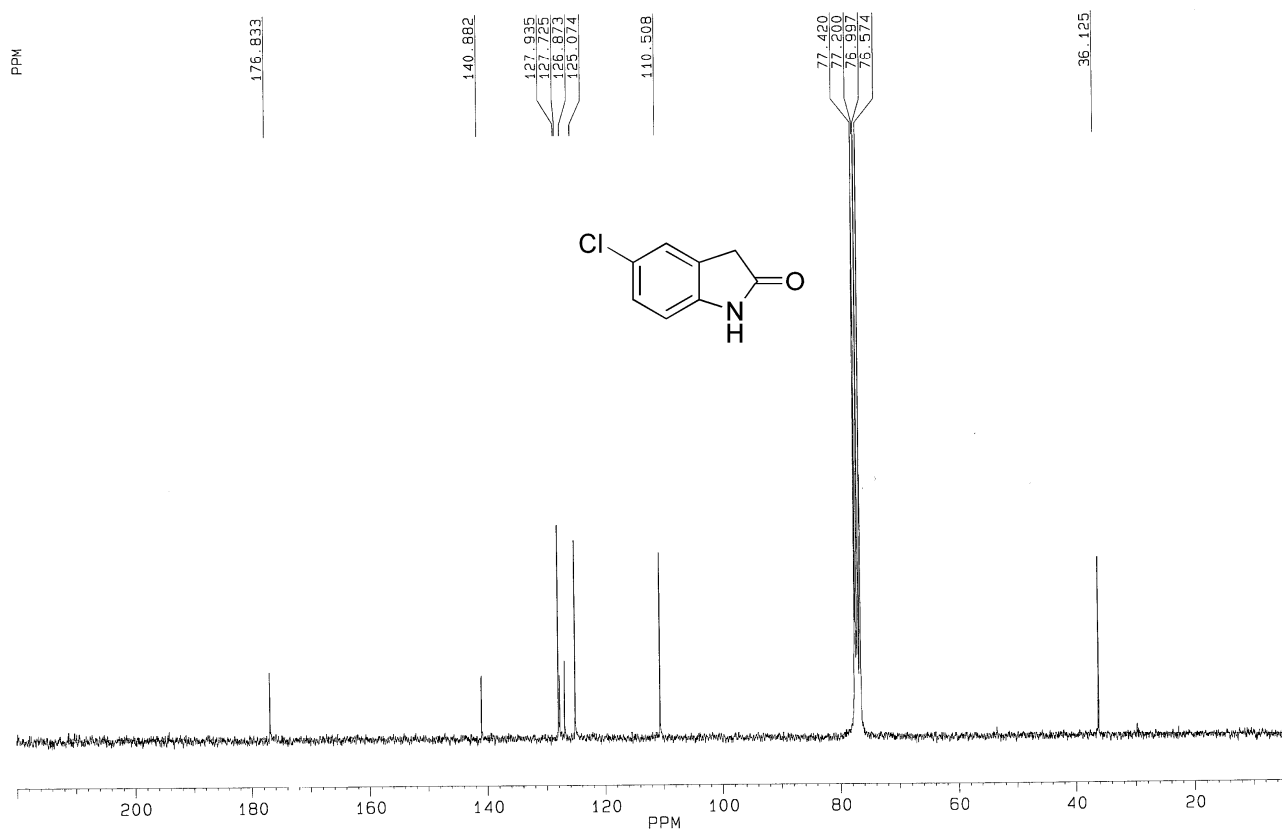

**5*H*-[1,3]dioxolo[4,5-*f*]indol-6(7*H*)-one (2x)**

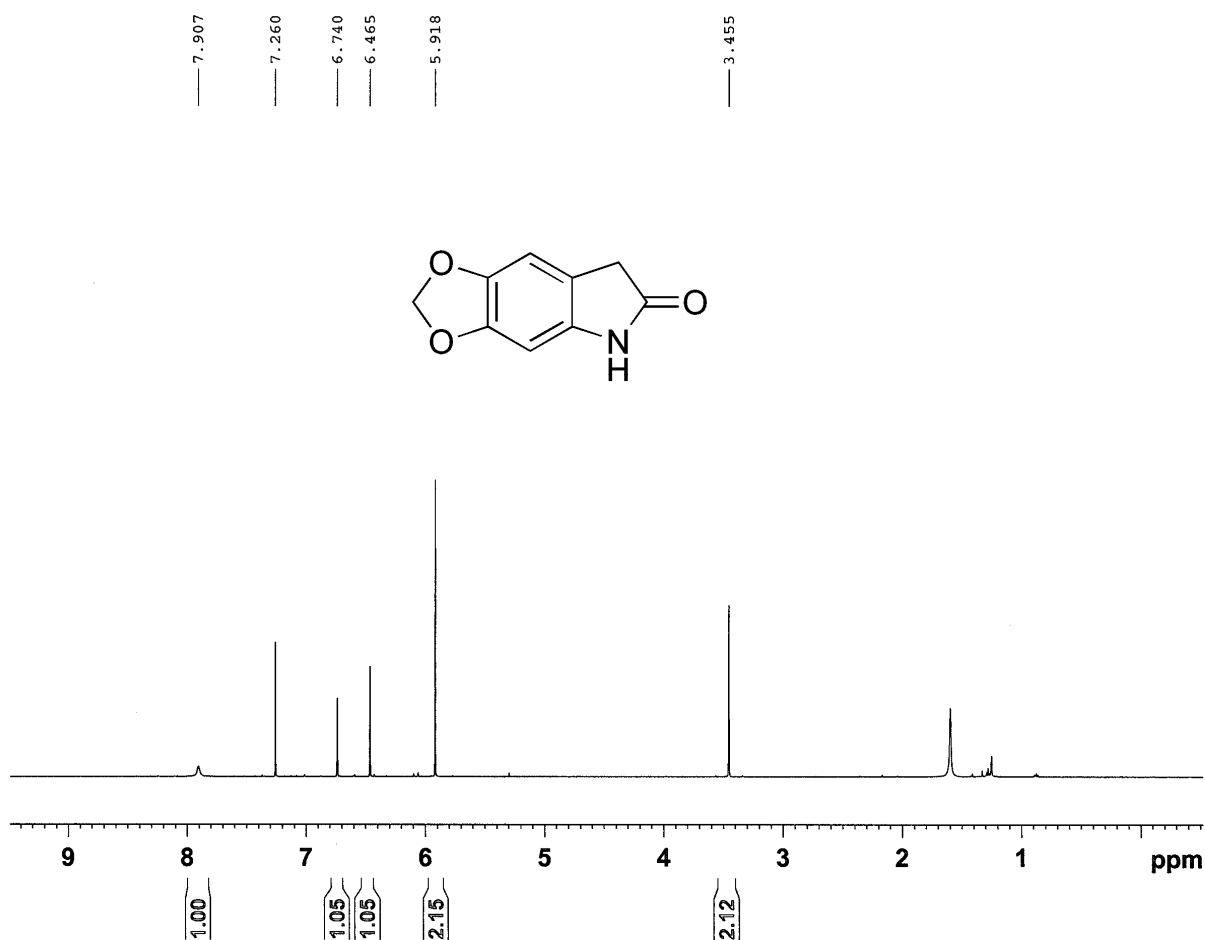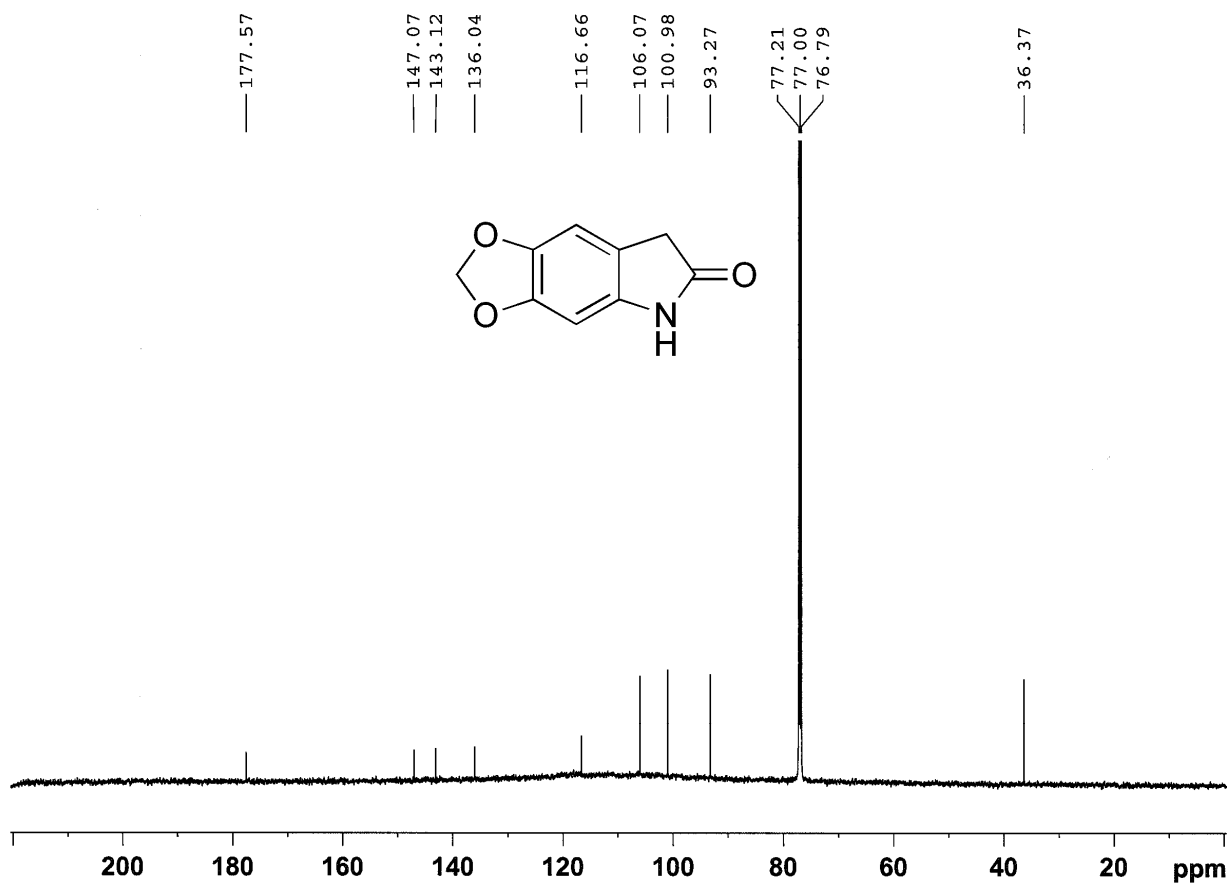



4'-Chlorospiro[cyclopentane-1,3'-indolin]-2'-one (2A)

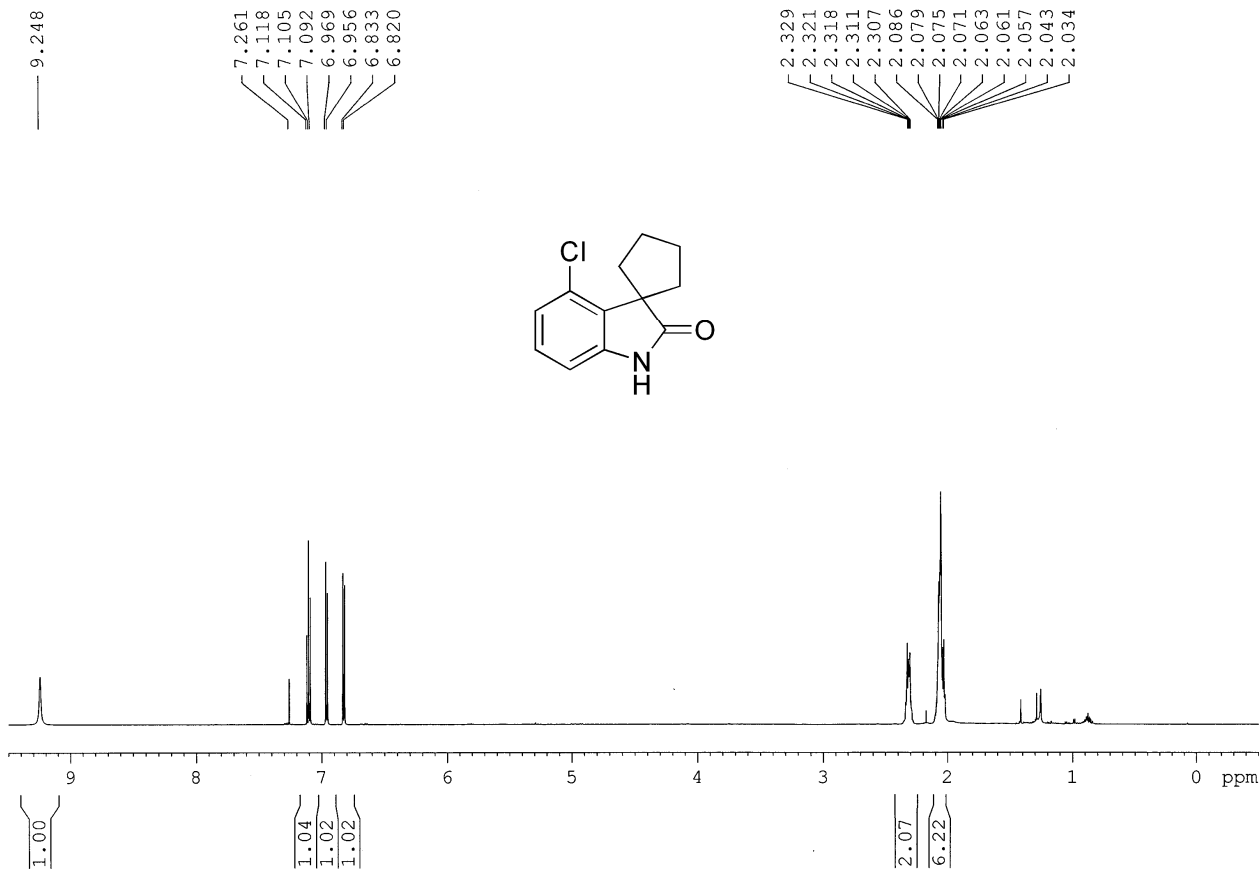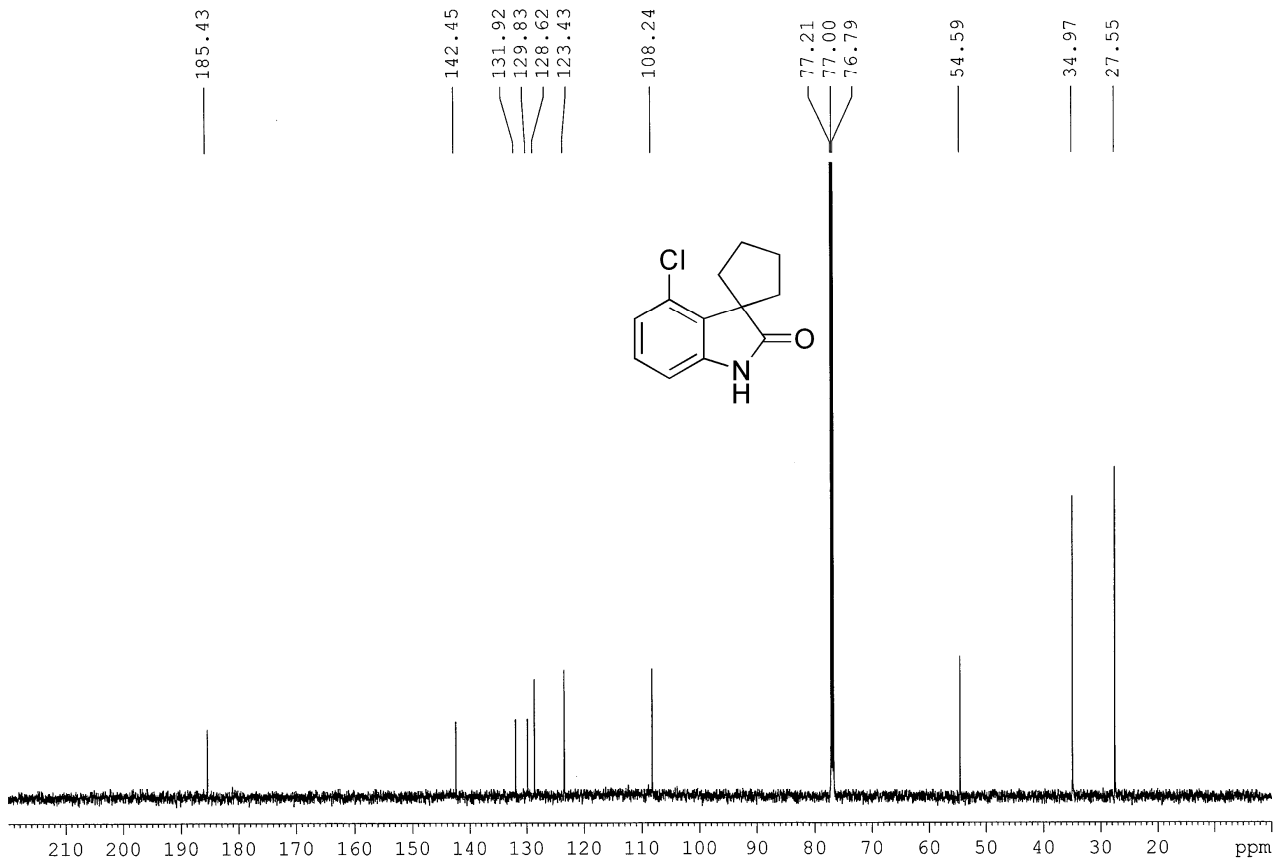

**5'-(Trifluoromethyl)spiro[cyclohexane-1,3'-indolin]-2'-one (2B)**

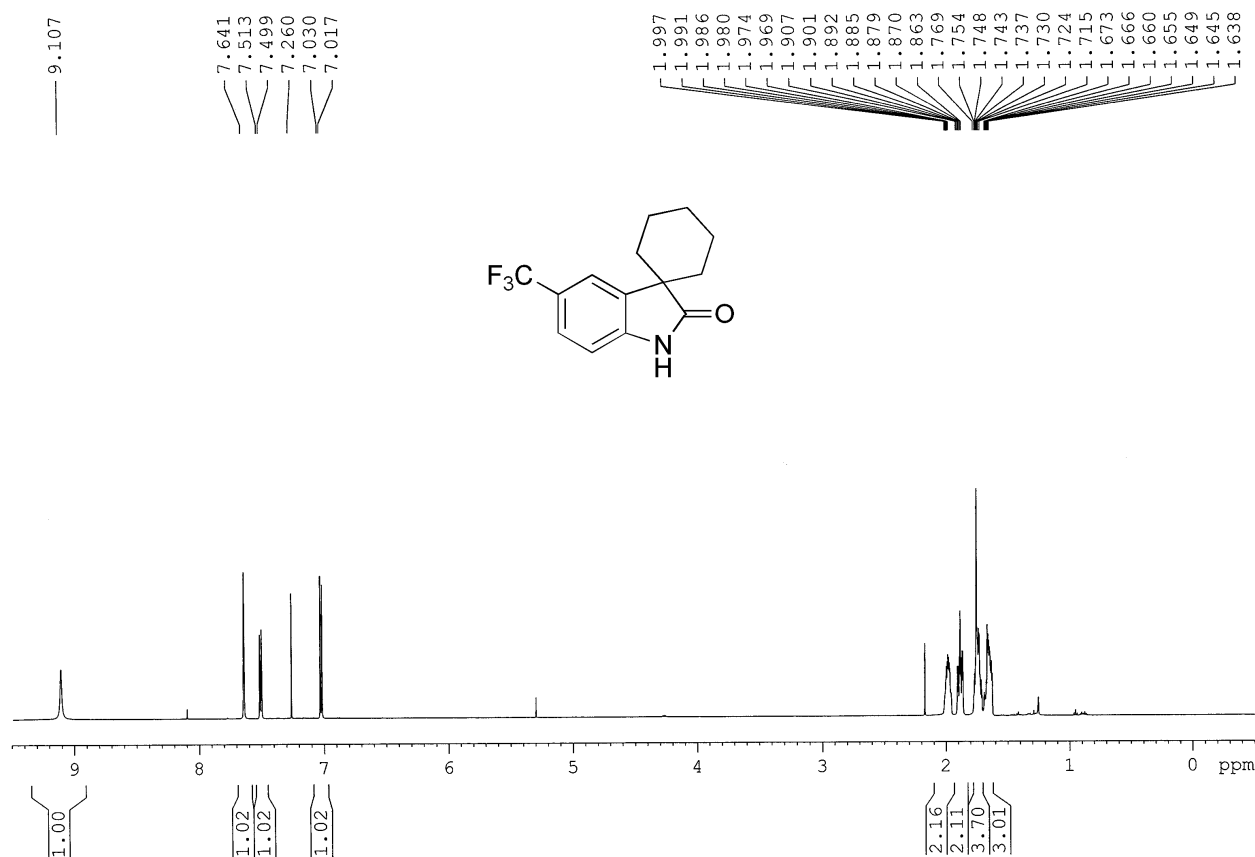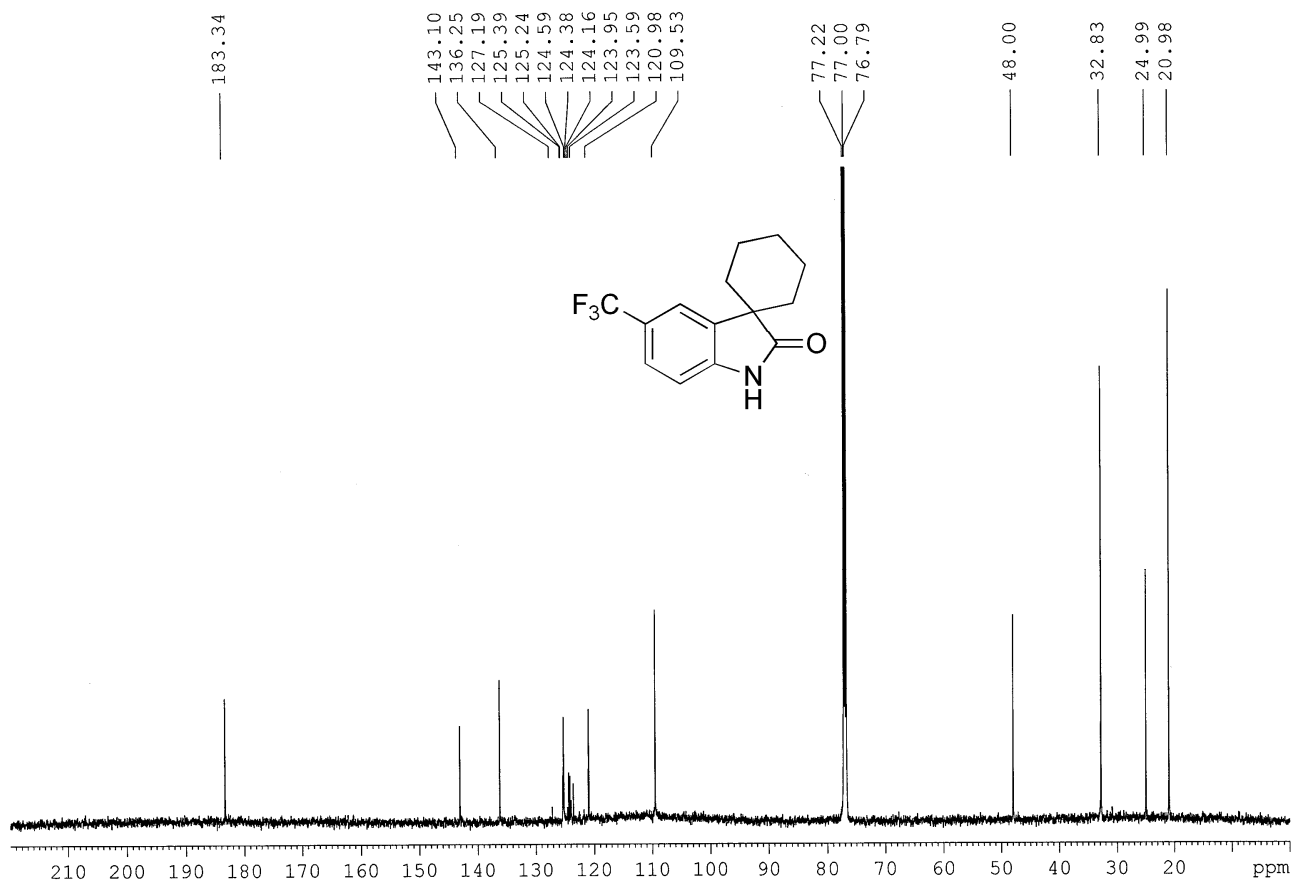

**5'-Methoxyspiro[cyclopentane-1,3'-indolin]-2'-one (2C)**

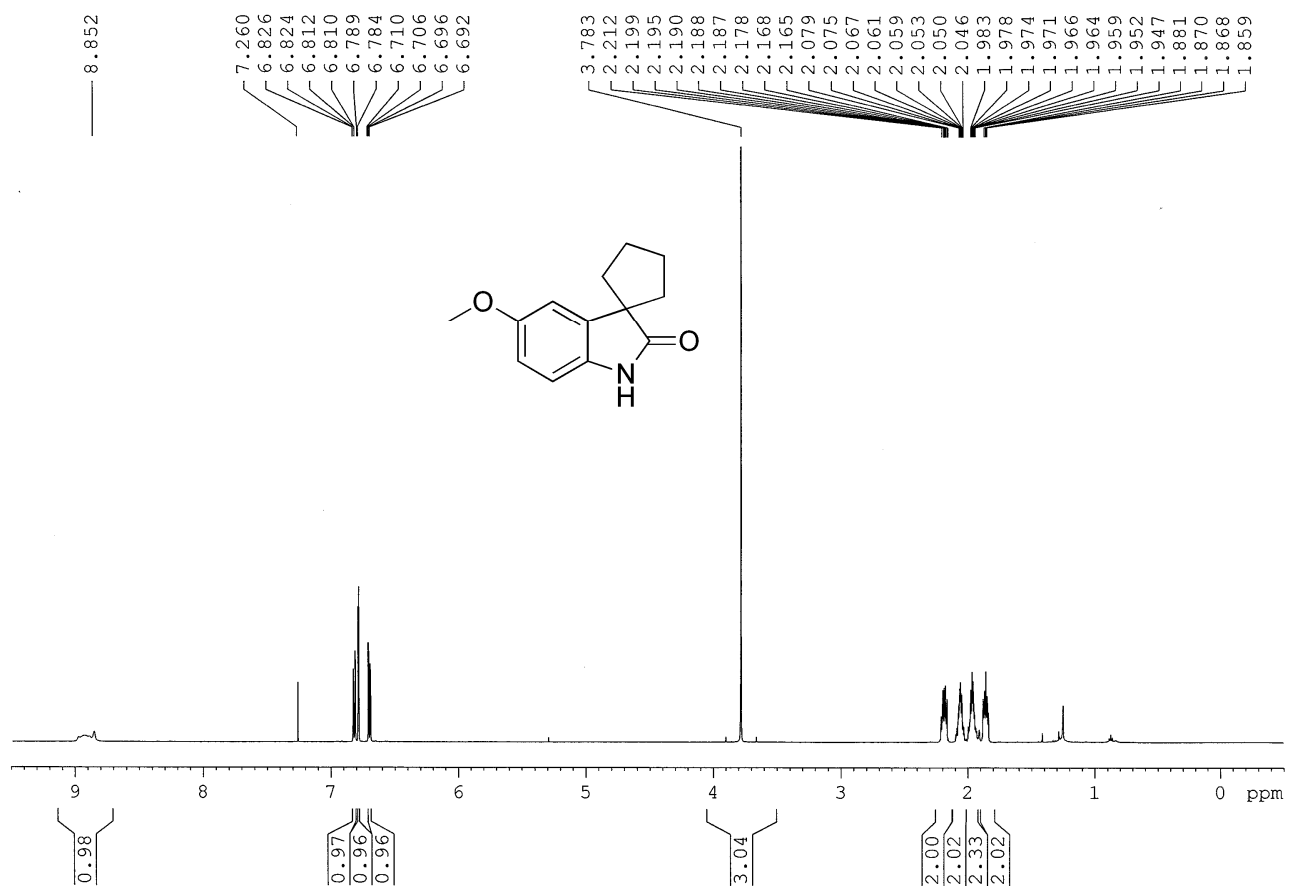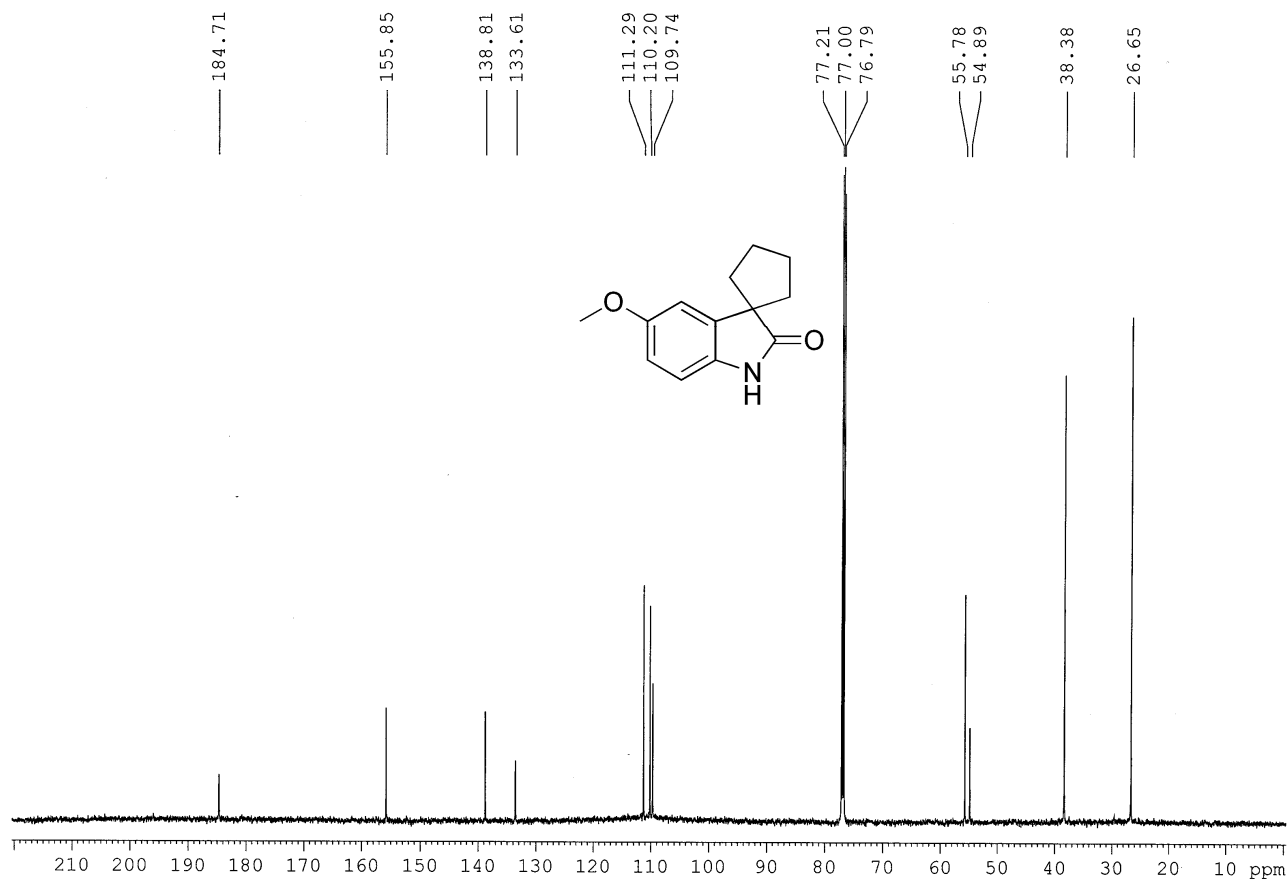

**Spiro[[1,3]dioxolo[4,5-f]indole-7,1'-cyclopentan]-6(5H)-one (2D')**

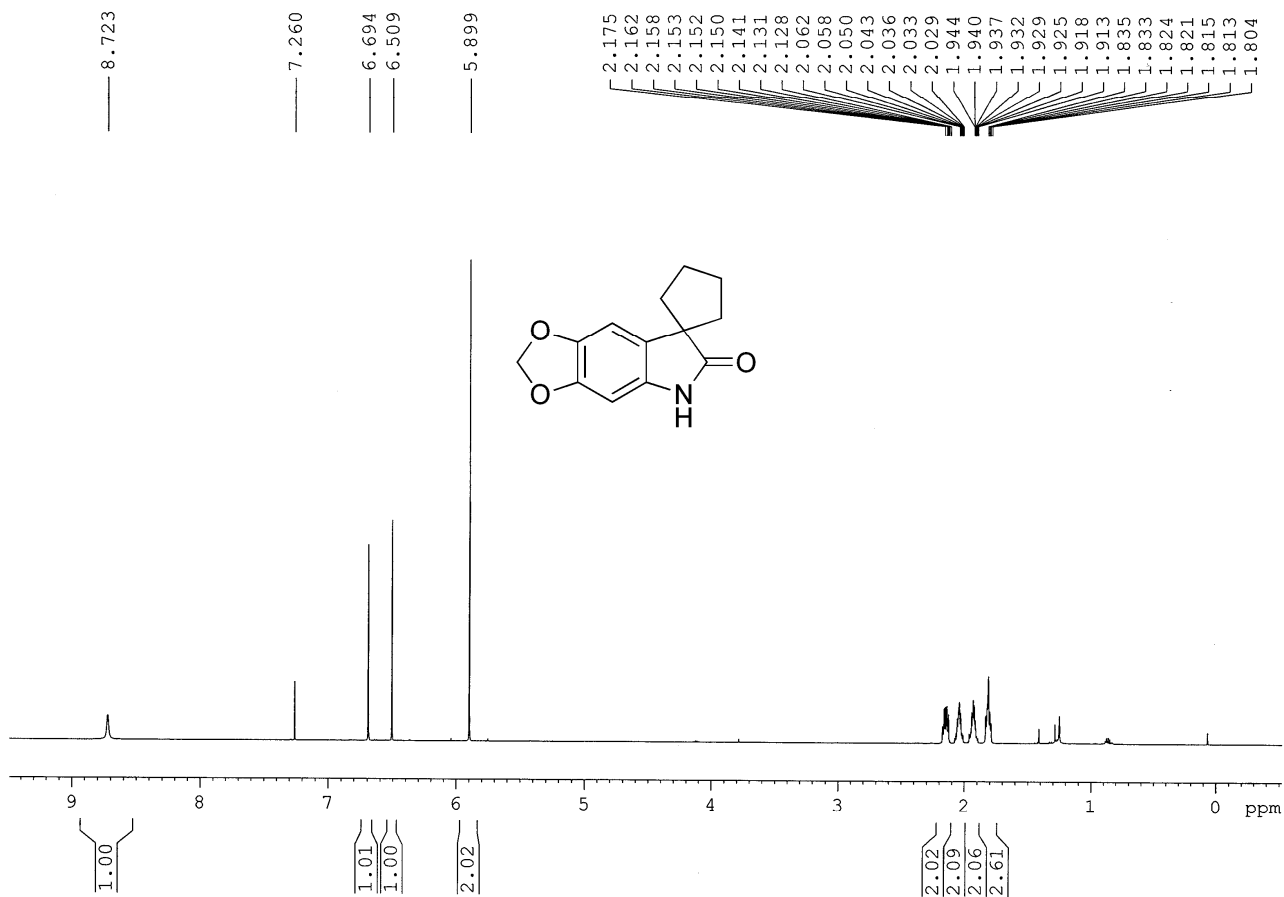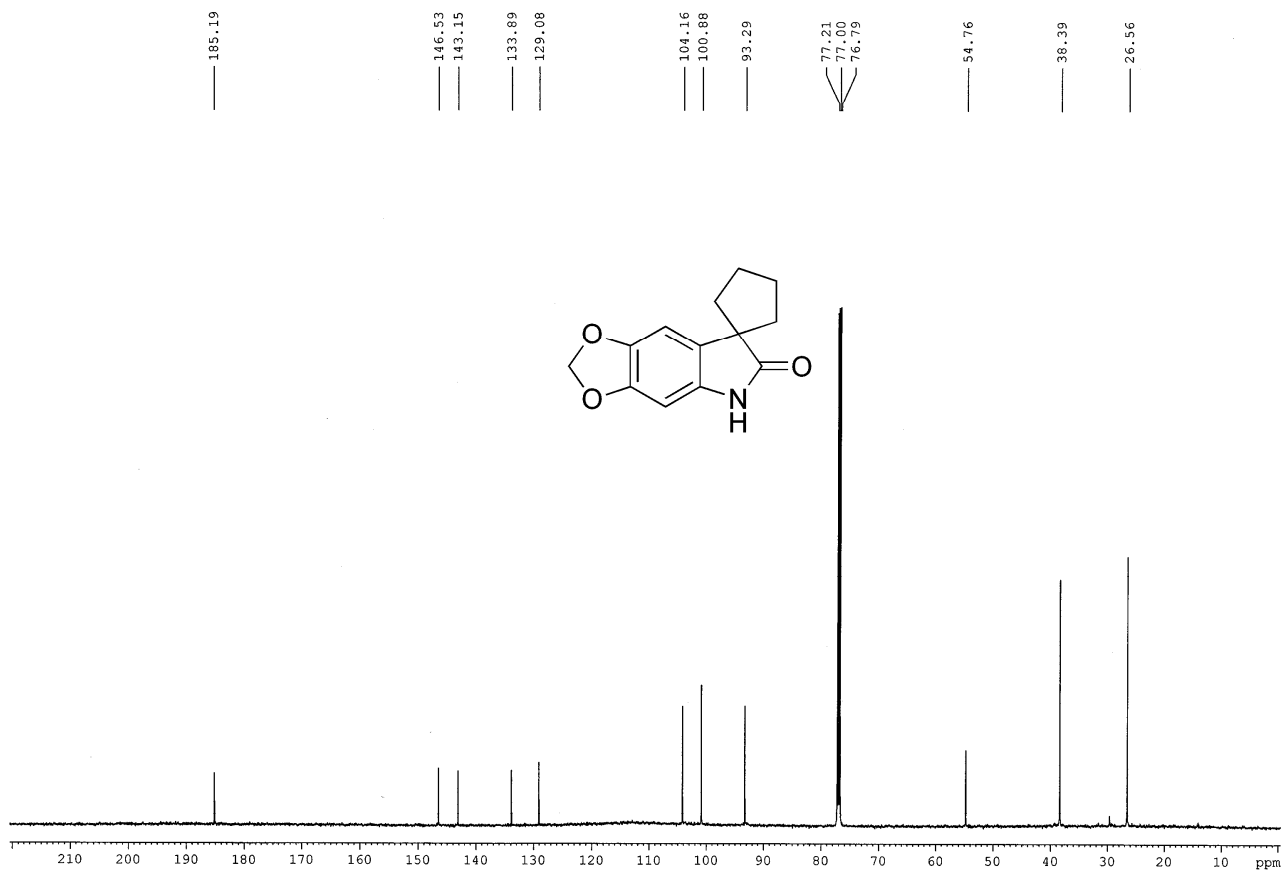

2',3',5',6'-Tetrahydrospiro[[1,3]dioxolo[4,5-f]indole-7,4'-pyran]-6(5*H*)-one (2D)

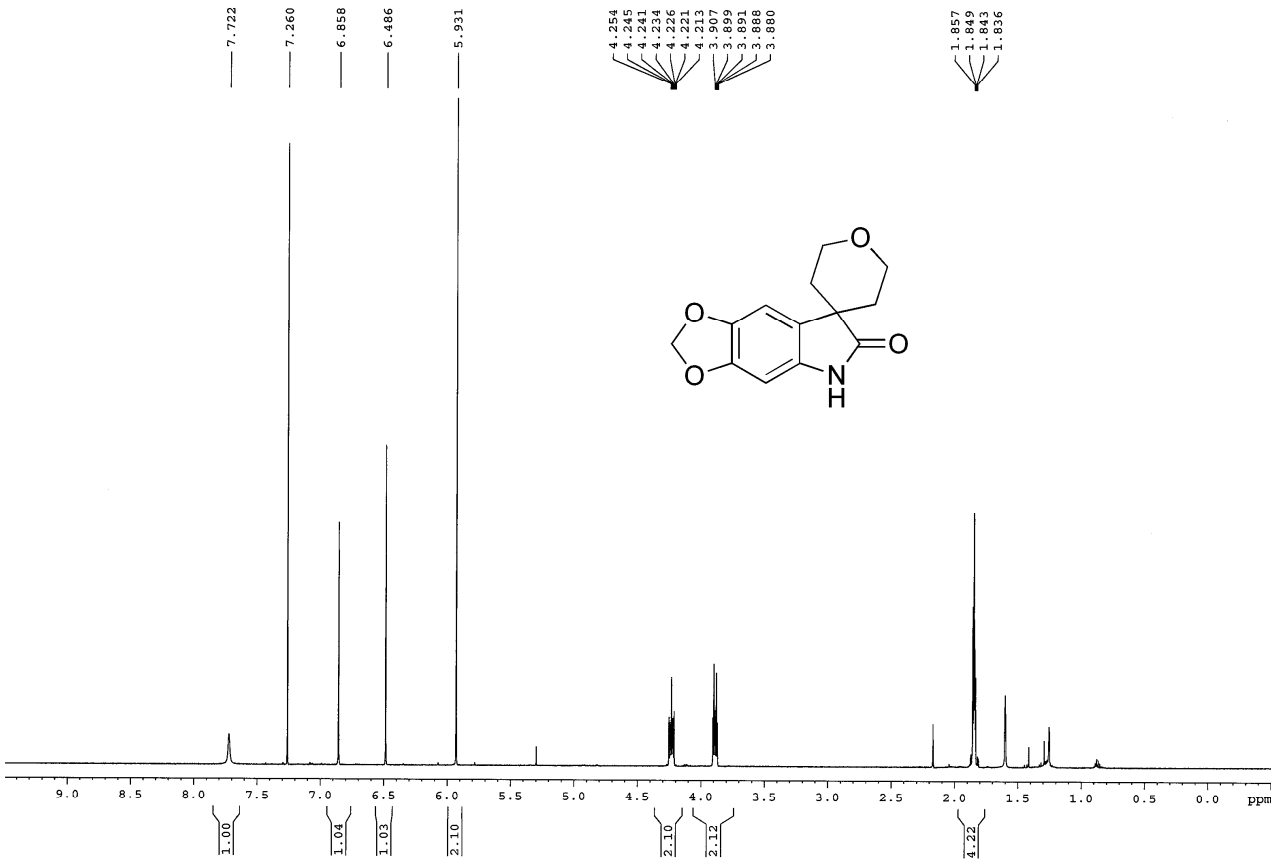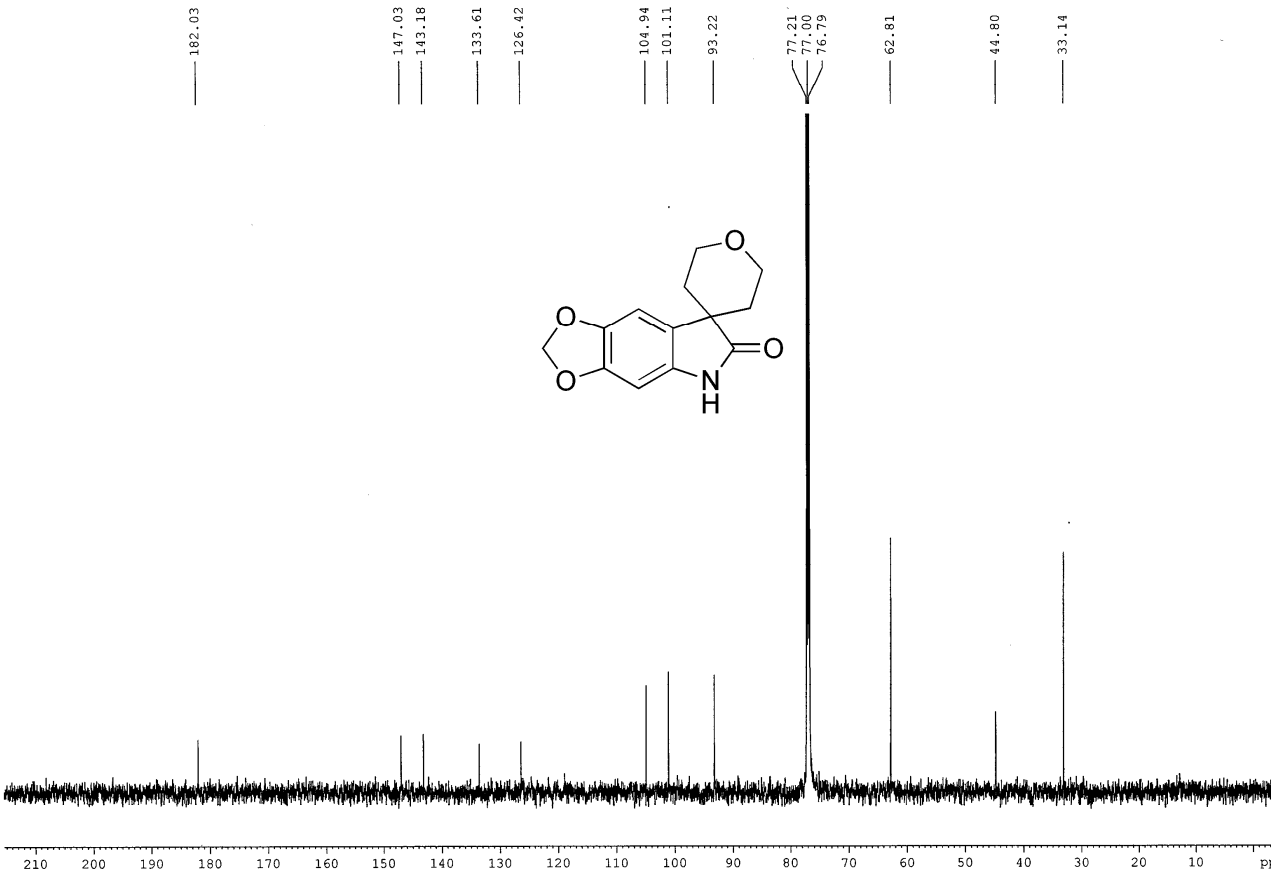

**(±)-Coerulescine (2y)**

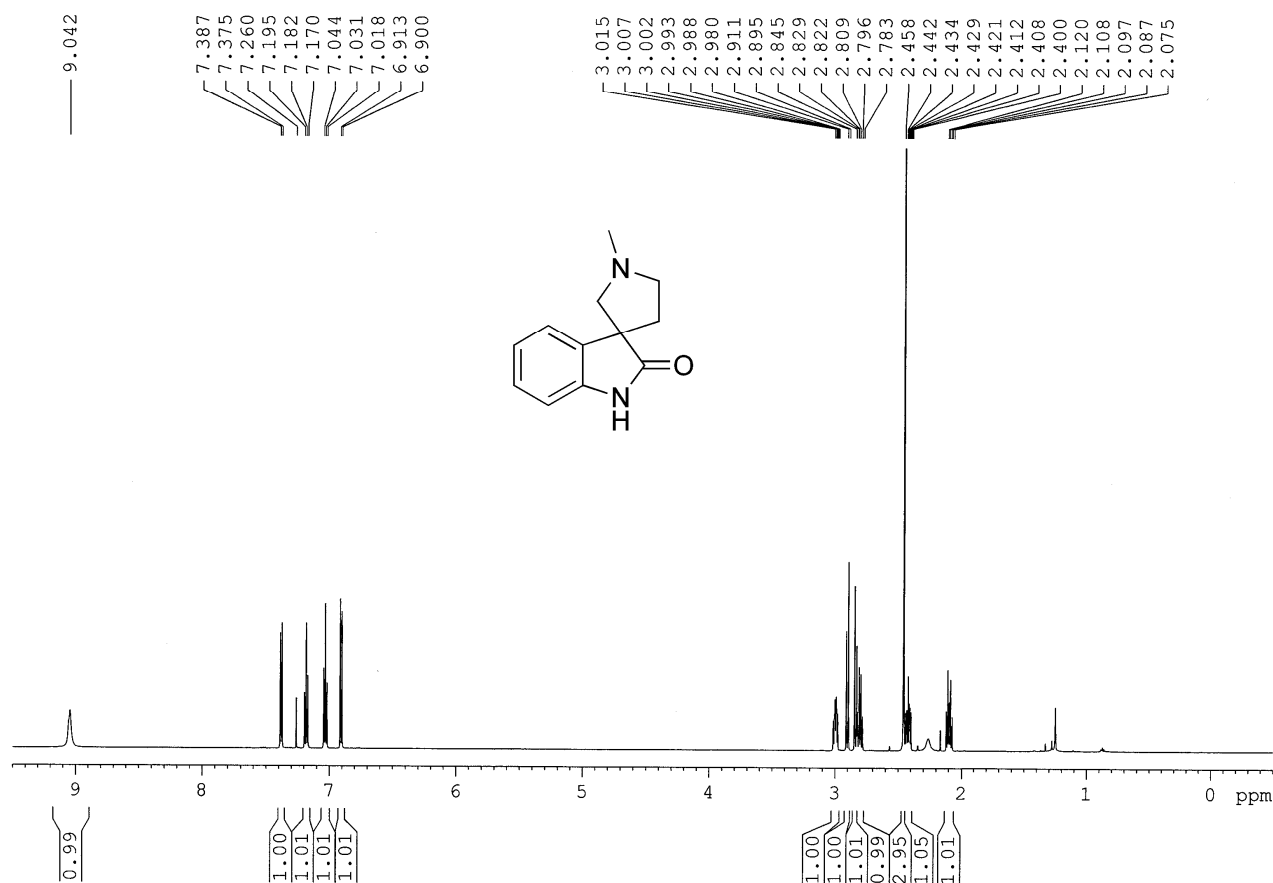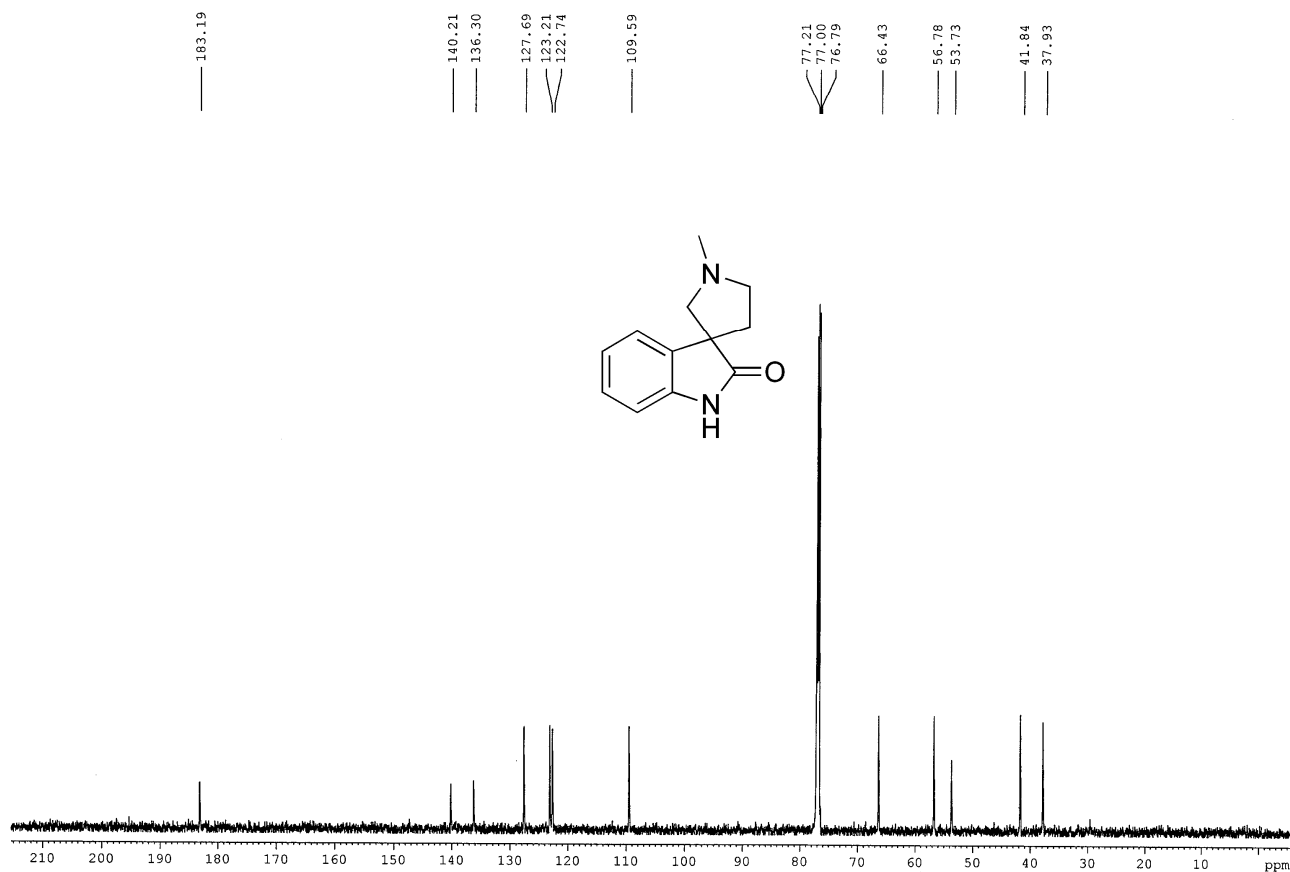

**(±)-Horsfiline (2F)**

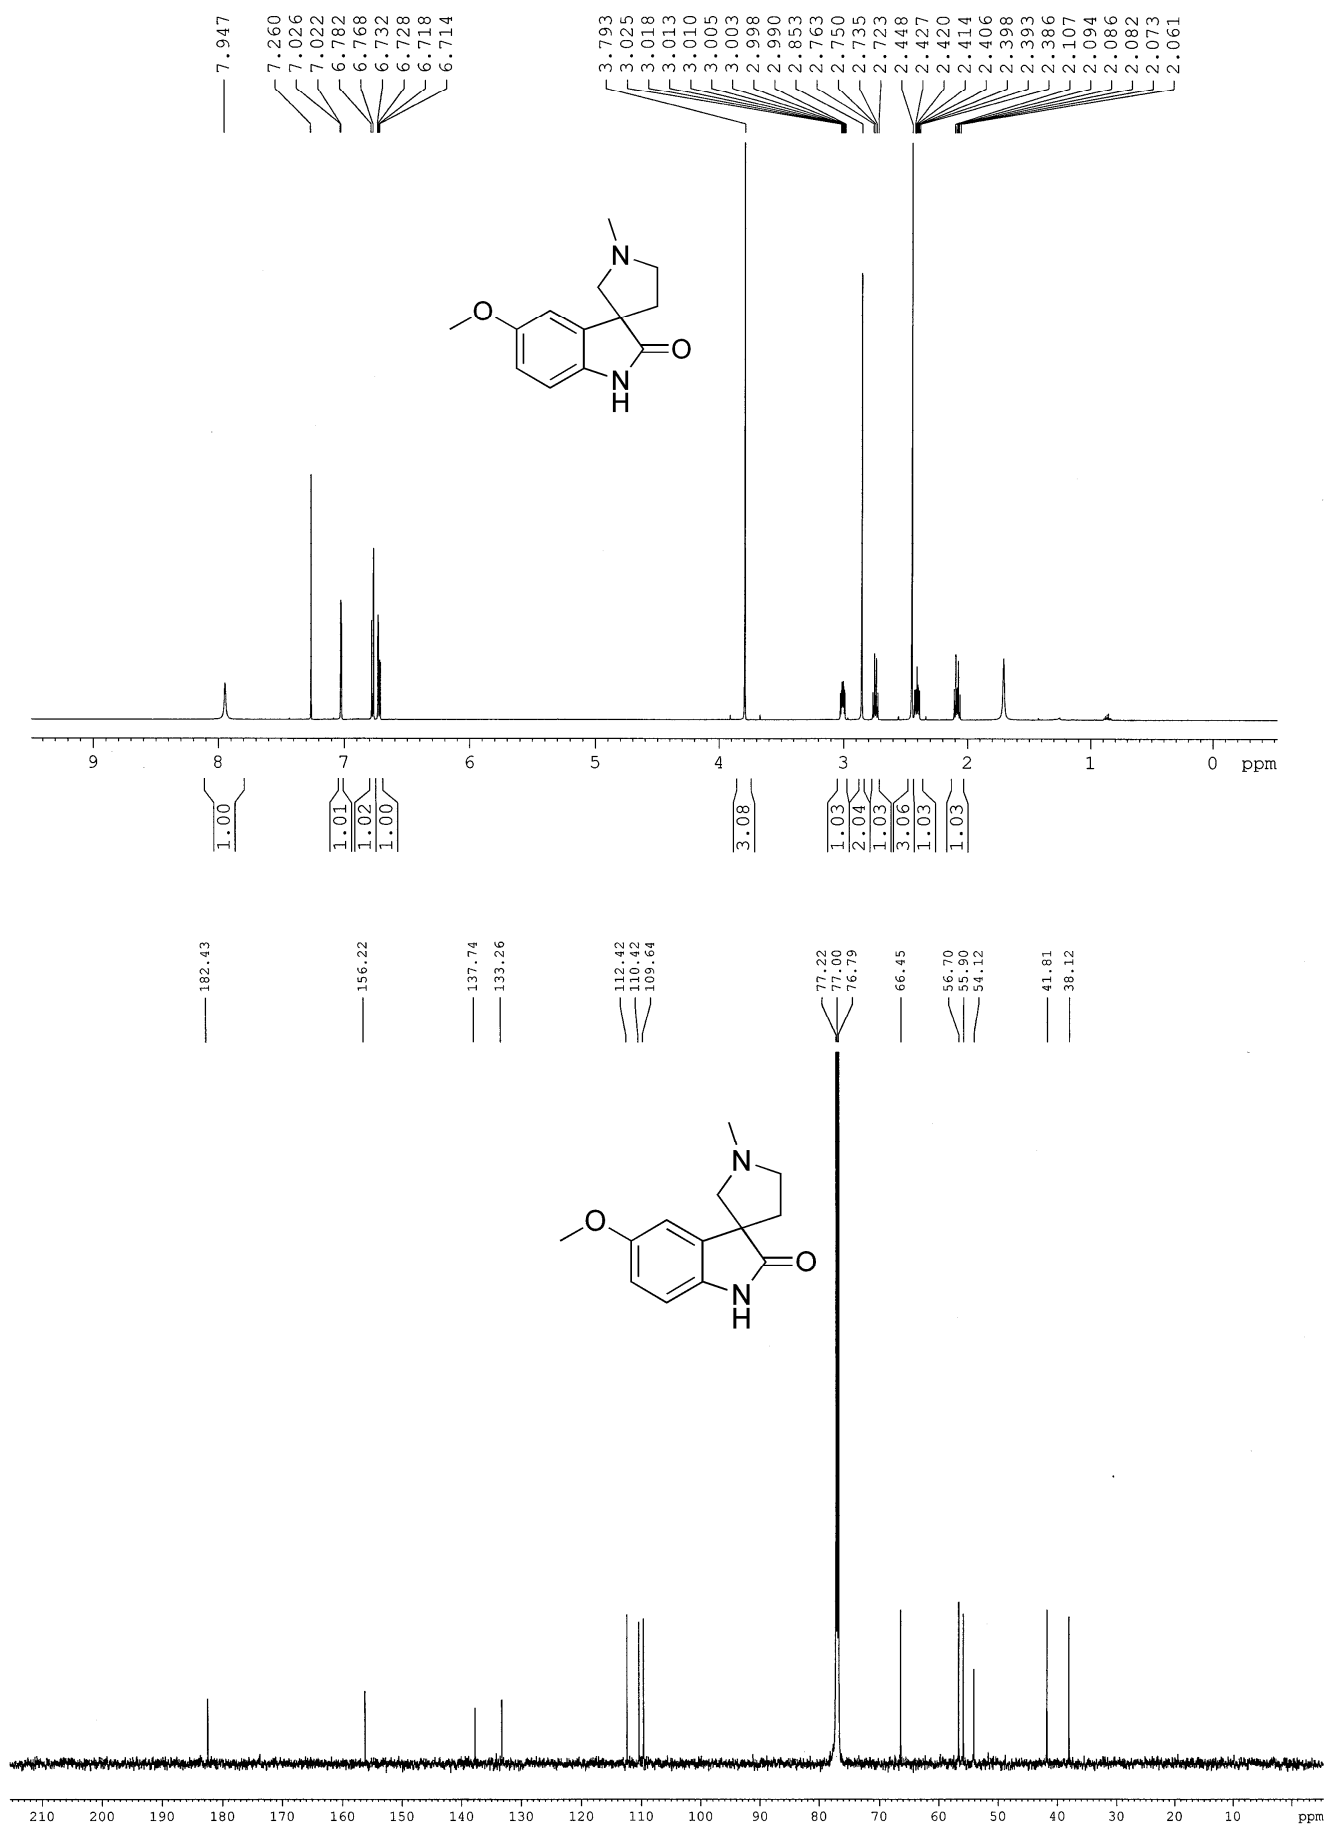

Supplement: c2ob26110c.pdf [file c2ob26110c.pdf]
